# Supplementary material for: A qRT-PCR Method Capable of Quantifying Specific Microorganisms Compared to NGS-Based Metagenome Profiling Data
Source: MDPI journal article supplement (doi:10.3390/microorganisms10020324), 2022-01-30
Supplement: s1 [file s1]

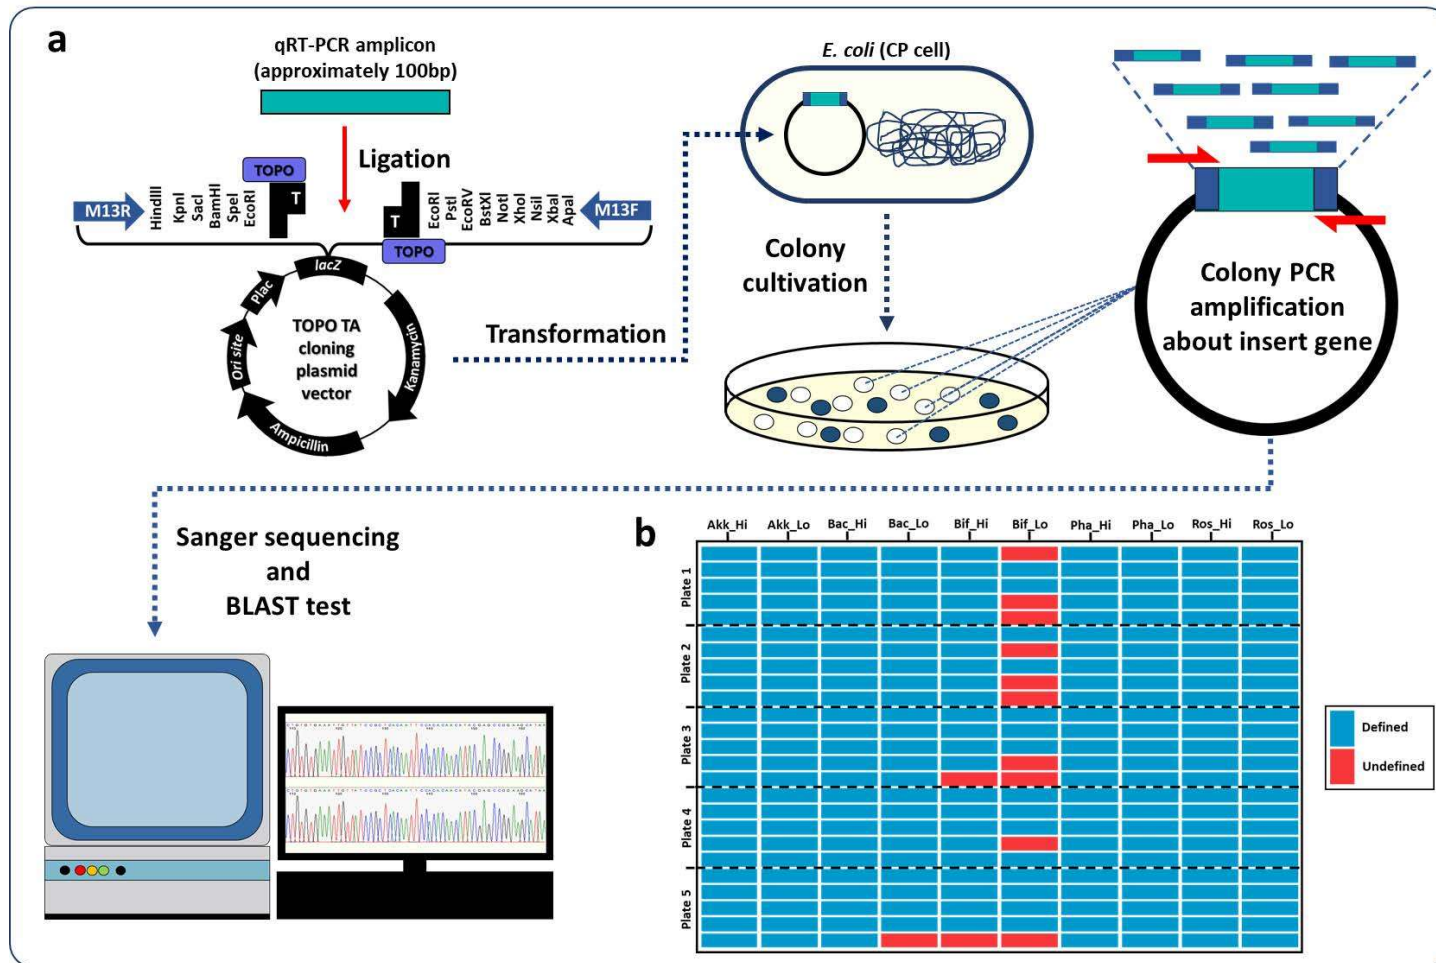

**Figure S2.** Verification of the specificity and accuracy of primers for quantifying the five bacterial genera using Sanger sequencing.
