# Supplementary material for: A qRT-PCR Method Capable of Quantifying Specific Microorganisms Compared to NGS-Based Metagenome Profiling Data
Source: MDPI journal article supplement (doi:10.3390/microorganisms10020324), 2022-01-30
Supplement: s1 [file s1]

## Akkermansia in silico test

Forward primer: 5'-CTTCGTGCTGGAAATCAACACC-3'

| Sequences producing significant alignments                                                                                            |                                                                                       |                                  |           |             |             |         |            |          |                            |
|---------------------------------------------------------------------------------------------------------------------------------------|---------------------------------------------------------------------------------------|----------------------------------|-----------|-------------|-------------|---------|------------|----------|----------------------------|
| Download <span>▼</span> <span>New</span> Select columns <span>▼</span> Show 100 <span>▼</span> <span>?</span>                         |                                                                                       |                                  |           |             |             |         |            |          |                            |
| <input checked="" type="checkbox"/> select all 100 sequences selected                                                                 |                                                                                       |                                  |           |             |             |         |            |          |                            |
| <a href="#">GenBank</a> <a href="#">Graphics</a> <a href="#">Distance tree of results</a> <span>New</span> <a href="#">MSA Viewer</a> |                                                                                       |                                  |           |             |             |         |            |          |                            |
|                                                                                                                                       | Description                                                                           | Scientific Name                  | Max Score | Total Score | Query Cover | E value | Per. Ident | Acc. Len | Accession                  |
| <input checked="" type="checkbox"/>                                                                                                   | <a href="#">Akkermansia muciniphila strain JCM 30893 chromosome, complete genome</a>  | <a href="#">Akkermansia m...</a> | 44.1      | 74.3        | 100%        | 0.047   | 100.00%    | 2878261  | <a href="#">CP048438.1</a> |
| <input checked="" type="checkbox"/>                                                                                                   | <a href="#">Akkermansia muciniphila strain EB-AMDK-49 chromosome, complete genome</a> | <a href="#">Akkermansia m...</a> | 44.1      | 74.3        | 100%        | 0.047   | 100.00%    | 2844808  | <a href="#">CP029706.1</a> |
| <input checked="" type="checkbox"/>                                                                                                   | <a href="#">Akkermansia muciniphila strain EB-AMDK-48 chromosome, complete genome</a> | <a href="#">Akkermansia m...</a> | 44.1      | 74.3        | 100%        | 0.047   | 100.00%    | 2844777  | <a href="#">CP029705.1</a> |

Reverse primer: 5'-CGATAATTCCGCTATTTTTCGC-3'

| Sequences producing significant alignments                                                                                            |                                                                                      |                                  |           |             |             |         |            |          |                            |
|---------------------------------------------------------------------------------------------------------------------------------------|--------------------------------------------------------------------------------------|----------------------------------|-----------|-------------|-------------|---------|------------|----------|----------------------------|
| Download <span>▼</span> <span>New</span> Select columns <span>▼</span> Show 100 <span>▼</span> <span>?</span>                         |                                                                                      |                                  |           |             |             |         |            |          |                            |
| <input checked="" type="checkbox"/> select all 100 sequences selected                                                                 |                                                                                      |                                  |           |             |             |         |            |          |                            |
| <a href="#">GenBank</a> <a href="#">Graphics</a> <a href="#">Distance tree of results</a> <span>New</span> <a href="#">MSA Viewer</a> |                                                                                      |                                  |           |             |             |         |            |          |                            |
|                                                                                                                                       | Description                                                                          | Scientific Name                  | Max Score | Total Score | Query Cover | E value | Per. Ident | Acc. Len | Accession                  |
| <input checked="" type="checkbox"/>                                                                                                   | <a href="#">Akkermansia muciniphila strain JCM 30893 chromosome, complete genome</a> | <a href="#">Akkermansia m...</a> | 46.1      | 46.1        | 100%        | 0.018   | 100.00%    | 2878261  | <a href="#">CP048438.1</a> |
| <input checked="" type="checkbox"/>                                                                                                   | <a href="#">Akkermansia muciniphila JCM 30893 DNA, complete genome</a>               | <a href="#">Akkermansia m...</a> | 46.1      | 46.1        | 100%        | 0.018   | 100.00%    | 2845645  | <a href="#">AP021898.1</a> |
| <input checked="" type="checkbox"/>                                                                                                   | <a href="#">Akkermansia muciniphila strain EB-AMDK-4 chromosome, complete genome</a> | <a href="#">Akkermansia m...</a> | 46.1      | 46.1        | 100%        | 0.018   | 100.00%    | 2664010  | <a href="#">CP024740.1</a> |

Bacteroides in silico test

Forward primer: 5'-GGTGCCTCTCAGACAATCAG-3'

| Sequences producing significant alignments                                                                                            |                                                                                       |                                    |           |             |             |         |            |          |                            |
|---------------------------------------------------------------------------------------------------------------------------------------|---------------------------------------------------------------------------------------|------------------------------------|-----------|-------------|-------------|---------|------------|----------|----------------------------|
| Download <span>▼</span> <span>New</span> Select columns <span>▼</span> Show 100 <span>▼</span> <span>?</span>                         |                                                                                       |                                    |           |             |             |         |            |          |                            |
| <input checked="" type="checkbox"/> select all 100 sequences selected                                                                 |                                                                                       |                                    |           |             |             |         |            |          |                            |
| <a href="#">GenBank</a> <a href="#">Graphics</a> <a href="#">Distance tree of results</a> <span>New</span> <a href="#">MSA Viewer</a> |                                                                                       |                                    |           |             |             |         |            |          |                            |
|                                                                                                                                       | Description                                                                           | Scientific Name                    | Max Score | Total Score | Query Cover | E value | Per. Ident | Acc. Len | Accession                  |
| <input checked="" type="checkbox"/>                                                                                                   | <a href="#">Bacteroides thetaiotaomicron strain 7330, complete genome</a>             | <a href="#">Bacteroides the...</a> | 40.1      | 40.1        | 100%        | 0.73    | 100.00%    | 6487685  | <a href="#">CP012937.1</a> |
| <input checked="" type="checkbox"/>                                                                                                   | <a href="#">Bacteroides ovatus strain CL06T03C20 chromosome, complete genome</a>      | <a href="#">Bacteroides ov...</a>  | 40.1      | 40.1        | 100%        | 0.73    | 100.00%    | 6651367  | <a href="#">CP072244.1</a> |
| <input checked="" type="checkbox"/>                                                                                                   | <a href="#">Bacteroides xylanisolvens strain APCS1/XY chromosome, complete genome</a> | <a href="#">Bacteroides xyl...</a> | 40.1      | 40.1        | 100%        | 0.73    | 100.00%    | 6461058  | <a href="#">CP042282.1</a> |

Reverse primer: 5'-CAATGATACCACTGAATCCGCT-3'

| Sequences producing significant alignments                                                                                            |                                                                                      |                                    |           |             |             |         |            |          |                            |
|---------------------------------------------------------------------------------------------------------------------------------------|--------------------------------------------------------------------------------------|------------------------------------|-----------|-------------|-------------|---------|------------|----------|----------------------------|
| Download <span>▼</span> <span>New</span> Select columns <span>▼</span> Show 100 <span>▼</span> <span>?</span>                         |                                                                                      |                                    |           |             |             |         |            |          |                            |
| <input checked="" type="checkbox"/> select all 96 sequences selected                                                                  |                                                                                      |                                    |           |             |             |         |            |          |                            |
| <a href="#">GenBank</a> <a href="#">Graphics</a> <a href="#">Distance tree of results</a> <span>New</span> <a href="#">MSA Viewer</a> |                                                                                      |                                    |           |             |             |         |            |          |                            |
|                                                                                                                                       | Description                                                                          | Scientific Name                    | Max Score | Total Score | Query Cover | E value | Per. Ident | Acc. Len | Accession                  |
| <input checked="" type="checkbox"/>                                                                                                   | <a href="#">Bacteroides fragilis strain FDAARGOS_763 chromosome, complete genome</a> | <a href="#">Bacteroides fra...</a> | 44.1      | 44.1        | 100%        | 0.046   | 100.00%    | 5460140  | <a href="#">CP054003.1</a> |
| <input checked="" type="checkbox"/>                                                                                                   | <a href="#">Bacteroides thetaiotaomicron strain 7330, complete genome</a>            | <a href="#">Bacteroides the...</a> | 44.1      | 44.1        | 100%        | 0.046   | 100.00%    | 6487685  | <a href="#">CP012937.1</a> |
| <input checked="" type="checkbox"/>                                                                                                   | <a href="#">Bacteroides ovatus strain CL06T03C20 chromosome, complete genome</a>     | <a href="#">Bacteroides ov...</a>  | 44.1      | 44.1        | 100%        | 0.046   | 100.00%    | 6651367  | <a href="#">CP072244.1</a> |

# Bifidobacterium in silico test

Forward primer: 5'-AAGGGCATCTCCGTCAACG-3'

| Sequences producing significant alignments                                                                                                                                                      |                                                                                       |                                          |           |             |             |         |            |          |                            |
|-------------------------------------------------------------------------------------------------------------------------------------------------------------------------------------------------|---------------------------------------------------------------------------------------|------------------------------------------|-----------|-------------|-------------|---------|------------|----------|----------------------------|
| Download <span>▼</span> <span>New</span> Select columns <span>▼</span> Show 100 <span>▼</span> <span>?</span>                                                                                   |                                                                                       |                                          |           |             |             |         |            |          |                            |
| <input checked="" type="checkbox"/> select all 100 sequences selected <span>GenBank</span> <span>Graphics</span> <span>Distance tree of results</span> <span>New</span> <span>MSA Viewer</span> |                                                                                       |                                          |           |             |             |         |            |          |                            |
|                                                                                                                                                                                                 | Description                                                                           | Scientific Name                          | Max Score | Total Score | Query Cover | E value | Per. Ident | Acc. Len | Accession                  |
| <input checked="" type="checkbox"/>                                                                                                                                                             | <a href="#">Bifidobacterium breve strain JTL chromosome, complete genome</a>          | <a href="#">Bifidobacterium breve</a>    | 38.2      | 38.2        | 100%        | 2.9     | 100.00%    | 2289549  | <a href="#">CP053940.1</a> |
| <input checked="" type="checkbox"/>                                                                                                                                                             | <a href="#">Bifidobacterium animalis strain Probio-M8 chromosome, complete genome</a> | <a href="#">Bifidobacterium animalis</a> | 38.2      | 38.2        | 100%        | 2.9     | 100.00%    | 1937197  | <a href="#">CP047190.1</a> |
| <input checked="" type="checkbox"/>                                                                                                                                                             | <a href="#">Bifidobacterium breve strain JR01 chromosome, complete genome</a>         | <a href="#">Bifidobacterium breve</a>    | 38.2      | 68.4        | 100%        | 2.9     | 100.00%    | 2304912  | <a href="#">CP040931.1</a> |

Reverse primer: 5'-GGAGACGAAGAAGGAAGCGA-3'

| Sequences producing significant alignments                                                                                                                                                     |                                                                                     |                                          |           |             |             |         |            |          |                            |
|------------------------------------------------------------------------------------------------------------------------------------------------------------------------------------------------|-------------------------------------------------------------------------------------|------------------------------------------|-----------|-------------|-------------|---------|------------|----------|----------------------------|
| Download <span>▼</span> <span>New</span> Select columns <span>▼</span> Show 50 <span>▼</span> <span>?</span>                                                                                   |                                                                                     |                                          |           |             |             |         |            |          |                            |
| <input checked="" type="checkbox"/> select all 10 sequences selected <span>GenBank</span> <span>Graphics</span> <span>Distance tree of results</span> <span>New</span> <span>MSA Viewer</span> |                                                                                     |                                          |           |             |             |         |            |          |                            |
|                                                                                                                                                                                                | Description                                                                         | Scientific Name                          | Max Score | Total Score | Query Cover | E value | Per. Ident | Acc. Len | Accession                  |
| <input checked="" type="checkbox"/>                                                                                                                                                            | <a href="#">Bifidobacterium longum Jih1 DNA, complete genome</a>                    | <a href="#">Bifidobacterium longum</a>   | 40.1      | 70.4        | 100%        | 0.73    | 100.00%    | 2371107  | <a href="#">AP022868.1</a> |
| <input checked="" type="checkbox"/>                                                                                                                                                            | <a href="#">Raphanus sativus genome assembly, chromosome: 2</a>                     | <a href="#">Raphanus sativus</a>         | 40.1      | 163         | 100%        | 0.73    | 100.00%    | 53721154 | <a href="#">LR778311.1</a> |
| <input checked="" type="checkbox"/>                                                                                                                                                            | <a href="#">Bifidobacterium adolescentis strain ZJ2 chromosome, complete genome</a> | <a href="#">Bifidobacterium adole...</a> | 40.1      | 40.1        | 100%        | 0.73    | 100.00%    | 2401766  | <a href="#">CP047129.1</a> |



Phascolarctobacterium in silico test

Forward primer: 5'-TTCCTGGTTATGTGCTTAGAG-3'

| Sequences producing significant alignments                                                                                            |                                                                                                                    |                                    |           |             |             |         |            |          |                            |
|---------------------------------------------------------------------------------------------------------------------------------------|--------------------------------------------------------------------------------------------------------------------|------------------------------------|-----------|-------------|-------------|---------|------------|----------|----------------------------|
| Download <span>▼</span> <span>New</span> Select columns <span>▼</span> Show 100 <span>▼</span> <span>?</span>                         |                                                                                                                    |                                    |           |             |             |         |            |          |                            |
| <input checked="" type="checkbox"/> select all 100 sequences selected                                                                 |                                                                                                                    |                                    |           |             |             |         |            |          |                            |
| <a href="#">GenBank</a> <a href="#">Graphics</a> <a href="#">Distance tree of results</a> <span>New</span> <a href="#">MSA Viewer</a> |                                                                                                                    |                                    |           |             |             |         |            |          |                            |
|                                                                                                                                       | Description                                                                                                        | Scientific Name                    | Max Score | Total Score | Query Cover | E value | Per. Ident | Acc. Len | Accession                  |
| <input checked="" type="checkbox"/>                                                                                                   | <a href="#">Rodentibacter pneumotropicus strain NCTC8284 genome assembly, chromosome: 1</a>                        | <a href="#">Rodentibacter p...</a> | 46.1      | 46.1        | 100%        | 0.018   | 100.00%    | 2439769  | <a href="#">LR134405.1</a> |
| <input checked="" type="checkbox"/>                                                                                                   | <a href="#">Phascolarctobacterium faecium isolate Phascolarctobacterium succinatutens 82G5 genome assembly,...</a> | <a href="#">Phascolarctoba...</a>  | 46.1      | 46.1        | 100%        | 0.018   | 100.00%    | 2550003  | <a href="#">LR215982.1</a> |
| <input checked="" type="checkbox"/>                                                                                                   | <a href="#">Phascolarctobacterium faecium JCM 30894 DNA, complete genome</a>                                       | <a href="#">Phascolarctoba...</a>  | 46.1      | 46.1        | 100%        | 0.018   | 100.00%    | 2454371  | <a href="#">AP019004.1</a> |

Reverse primer: 5'-CAGTCAAAGGAATCGGTTTAGTA-3'

| Sequences producing significant alignments                                                                                            |                                                                                                                    |                                   |           |             |             |         |            |          |                            |
|---------------------------------------------------------------------------------------------------------------------------------------|--------------------------------------------------------------------------------------------------------------------|-----------------------------------|-----------|-------------|-------------|---------|------------|----------|----------------------------|
| Download <span>▼</span> <span>New</span> Select columns <span>▼</span> Show 100 <span>▼</span> <span>?</span>                         |                                                                                                                    |                                   |           |             |             |         |            |          |                            |
| <input checked="" type="checkbox"/> select all 100 sequences selected                                                                 |                                                                                                                    |                                   |           |             |             |         |            |          |                            |
| <a href="#">GenBank</a> <a href="#">Graphics</a> <a href="#">Distance tree of results</a> <span>New</span> <a href="#">MSA Viewer</a> |                                                                                                                    |                                   |           |             |             |         |            |          |                            |
|                                                                                                                                       | Description                                                                                                        | Scientific Name                   | Max Score | Total Score | Query Cover | E value | Per. Ident | Acc. Len | Accession                  |
| <input checked="" type="checkbox"/>                                                                                                   | <a href="#">Phascolarctobacterium faecium isolate Phascolarctobacterium succinatutens 82G5 genome assembly,...</a> | <a href="#">Phascolarctoba...</a> | 46.1      | 46.1        | 100%        | 0.018   | 100.00%    | 2550003  | <a href="#">LR215982.1</a> |
| <input checked="" type="checkbox"/>                                                                                                   | <a href="#">Phascolarctobacterium faecium JCM 30894 DNA, complete genome</a>                                       | <a href="#">Phascolarctoba...</a> | 46.1      | 46.1        | 100%        | 0.018   | 100.00%    | 2454371  | <a href="#">AP019004.1</a> |
| <input checked="" type="checkbox"/>                                                                                                   | <a href="#">Phascolarctobacterium faecium strain G104 chromosome, complete genome</a>                              | <a href="#">Phascolarctoba...</a> | 46.1      | 46.1        | 100%        | 0.018   | 100.00%    | 2364938  | <a href="#">CP061002.1</a> |

Roseburia in silico test

Forward primer: 5'-AAATACCCGTGGTGTACCG-3'

| Sequences producing significant alignments                                                                                            |                                                                                          |                                    |           |             |             |         |            |          |                            |
|---------------------------------------------------------------------------------------------------------------------------------------|------------------------------------------------------------------------------------------|------------------------------------|-----------|-------------|-------------|---------|------------|----------|----------------------------|
| Download <span>New</span> Select columns <span>Show</span> 100 <span>?</span>                                                         |                                                                                          |                                    |           |             |             |         |            |          |                            |
| <input checked="" type="checkbox"/> select all 100 sequences selected                                                                 |                                                                                          |                                    |           |             |             |         |            |          |                            |
| <a href="#">GenBank</a> <a href="#">Graphics</a> <a href="#">Distance tree of results</a> <span>New</span> <a href="#">MSA Viewer</a> |                                                                                          |                                    |           |             |             |         |            |          |                            |
|                                                                                                                                       | Description                                                                              | Scientific Name                    | Max Score | Total Score | Query Cover | E value | Per. Ident | Acc. Len | Accession                  |
| <input checked="" type="checkbox"/>                                                                                                   | <a href="#">Roseburia intestinalis L1-82 genome assembly, chromosome: 1</a>              | <a href="#">Roseburia intes...</a> | 40.1      | 40.1        | 100%        | 0.73    | 100.00%    | 4493348  | <a href="#">LR027880.1</a> |
| <input checked="" type="checkbox"/>                                                                                                   | <a href="#">Acetobacterium sp. KB-1 chromosome</a>                                       | <a href="#">Acetobacterium...</a>  | 40.1      | 40.1        | 100%        | 0.73    | 100.00%    | 3988368  | <a href="#">CP030040.1</a> |
| <input checked="" type="checkbox"/>                                                                                                   | <a href="#">Acetobacterium woodii DSM 1030, complete genome</a>                          | <a href="#">Acetobacterium...</a>  | 40.1      | 40.1        | 100%        | 0.73    | 100.00%    | 4044777  | <a href="#">CP002987.1</a> |
| <input checked="" type="checkbox"/>                                                                                                   | <a href="#">Roseburia hominis isolate MGYG-HGUT-02517 genome assembly, chromosome: 1</a> | <a href="#">Roseburia homi...</a>  | 40.1      | 40.1        | 100%        | 0.73    | 100.00%    | 3592125  | <a href="#">LR699011.1</a> |
| <input checked="" type="checkbox"/>                                                                                                   | <a href="#">Roseburia intestinalis XB6B4 draft genome</a>                                | <a href="#">Roseburia intes...</a> | 40.1      | 40.1        | 100%        | 0.73    | 100.00%    | 4286292  | <a href="#">FP929050.1</a> |
| <input checked="" type="checkbox"/>                                                                                                   | <a href="#">Roseburia intestinalis M50/1 draft genome</a>                                | <a href="#">Roseburia intes...</a> | 40.1      | 40.1        | 100%        | 0.73    | 100.00%    | 4143550  | <a href="#">FP929049.1</a> |

Reverse primer: 5'-GTGTCTCCCTCTGTAAAGTCA-3'

| Sequences producing significant alignments                                                                                            |                                                                             |                                    |           |             |             |         |            |          |                            |
|---------------------------------------------------------------------------------------------------------------------------------------|-----------------------------------------------------------------------------|------------------------------------|-----------|-------------|-------------|---------|------------|----------|----------------------------|
| Download <span>New</span> Select columns <span>Show</span> 100 <span>?</span>                                                         |                                                                             |                                    |           |             |             |         |            |          |                            |
| <input checked="" type="checkbox"/> select all 100 sequences selected                                                                 |                                                                             |                                    |           |             |             |         |            |          |                            |
| <a href="#">GenBank</a> <a href="#">Graphics</a> <a href="#">Distance tree of results</a> <span>New</span> <a href="#">MSA Viewer</a> |                                                                             |                                    |           |             |             |         |            |          |                            |
|                                                                                                                                       | Description                                                                 | Scientific Name                    | Max Score | Total Score | Query Cover | E value | Per. Ident | Acc. Len | Accession                  |
| <input checked="" type="checkbox"/>                                                                                                   | <a href="#">Roseburia intestinalis L1-82 genome assembly, chromosome: 1</a> | <a href="#">Roseburia intes...</a> | 42.1      | 42.1        | 100%        | 0.18    | 100.00%    | 4493348  | <a href="#">LR027880.1</a> |
| <input checked="" type="checkbox"/>                                                                                                   | <a href="#">Roseburia intestinalis XB6B4 draft genome</a>                   | <a href="#">Roseburia intes...</a> | 42.1      | 42.1        | 100%        | 0.18    | 100.00%    | 4286292  | <a href="#">FP929050.1</a> |
| <input checked="" type="checkbox"/>                                                                                                   | <a href="#">Roseburia intestinalis M50/1 draft genome</a>                   | <a href="#">Roseburia intes...</a> | 42.1      | 42.1        | 100%        | 0.18    | 100.00%    | 4143550  | <a href="#">FP929049.1</a> |

Figure S1. In silico test to confirm of primer specificity for targeted bacterial genus.
