# Supplementary material for: A qRT-PCR Method Capable of Quantifying Specific Microorganisms Compared to NGS-Based Metagenome Profiling Data
Source: Microorganisms. 2022 Jan 30;10(2):324. doi: 10.3390/microorganisms10020324 (PMC8875016; doi:10.3390/microorganisms10020324)
Supplement: Supplementary file 1 [file microorganisms-10-00324-s001.zip]

Archive with 9 entries (9 files):
- Supplementary data Table S7.xlsx
- Supplementary Figure S1.pdf
- Supplementary Figure S2.pdf
- Supplementary Table S1.xlsx
- Supplementary Table S2.xlsx
- Supplementary Table S3.xlsx
- Supplementary Table S4..xlsx
- Supplementary Table S5.xlsx
- Supplementary Table S6.xlsx
