# Supplementary material for: A qRT-PCR Method Capable of Quantifying Specific Microorganisms Compared to NGS-Based Metagenome Profiling Data
Source: Microorganisms. 2022 Jan 30;10(2):324. doi: 10.3390/microorganisms10020324 (PMC8875016; doi:10.3390/microorganisms10020324)
Supplement: Supplementary file 1 [file microorganisms-10-00324-s001.zip › Supplementary data Table S7.xlsx]

## Sheet: Akkermansia_Hgih
Supplementary Table S7. Bacterial identification results of each genus by BLAST test
Akkermansia. sp High Top 5 BLAST Results
No.	Sample	Name	Colony no.	Input sequence	Description	Accession
1	Candidate 2 (Ct: 18.40)	Akk_Ma_01	1	CGCCAGTGTGATGGATATCTGCAGAATTCGCCCTTCTTCGTGCTGGGAAATCAACACCATTCCCGGCATGACCCCTTCCAGCCTGCTTCCCAAGGCGGCGGCGGCCTCCGGATGGCCCTATGAAGACCTCTGCGAAAAAATAGCGGAATTATCGAAGGGCGAATTCCAGCACACTGGCGGCCGTTACTAGTGGATCCGAGCTCGGTACCAAGCTTGGCGTAATCATGGTCATAGCTGTTTCCTGKGTGAAATTGTTATCCGCAA	Akkermansia muciniphila strain JCM 30893 chromosome, complete genome	CP048438.1
					Akkermansia muciniphila JCM 30893 DNA, complete genome	AP021898.1
					Akkermansia muciniphila strain DSM 22959 chromosome, complete genome	CP042830.1
					Akkermansia muciniphila isolate MGYG-HGUT-02454 genome assembly, chromosome: 1	LR699001.1
					Akkermansia muciniphila strain 139 chromosome, complete genome	CP036293.1
			2	CGCCAGTGTGATGGATATCTGCAGAATTCGCCCTTCTTCGTGCTGGAAATCAACACCATTCCCGGCATGACCCCTTCCAGCCTGCTTCCCAAGGCGGCGGCGGCCTCCGGATGGCCCTATGAAGACCTCTGCGAAAAAATAGCGGAATTATCGAAGGGCGAATTCCAGCACACTGGCGGCCGTTACTAGTGGATCCGAGCTCGGTACCAAGCTTGGCGTAATCATGGTCATAGCTGTTTCCTGKGKGAAATTGKTATCCGCAA	Akkermansia muciniphila strain JCM 30893 chromosome, complete genome	CP048438.1
					Akkermansia muciniphila JCM 30893 DNA, complete genome	AP021898.1
					Akkermansia muciniphila strain DSM 22959 chromosome, complete genome	CP042830.1
					Akkermansia muciniphila isolate MGYG-HGUT-02454 genome assembly, chromosome: 1	LR699001.1
					Akkermansia muciniphila strain 139 chromosome, complete genome	CP036293.1
			3	CGCCAGTGTGATGGATATCTGCAGAATTCGCCCTTCTTCGTGCTGGAAATCAACACCATTCCCGGCATGACCCCTTCCAGCCTGCTTCCCAAGGCGGCGGCGGCCTCCGGATGGCCCTATGAAGACCTCTGCGAAAAAATAGCGGAATTATCGAAGGGCGAATTCCAGCACACTGGCGGCCGTTACTAGTGGATCCGAGCTCGGTACCAAGCTTGGCGTAATCATGGTCATAGCTGTTTCCTGTGTGAAATTGTTATCCGCA	Akkermansia muciniphila strain JCM 30893 chromosome, complete genome	CP048438.1
					Akkermansia muciniphila JCM 30893 DNA, complete genome	AP021898.1
					Akkermansia muciniphila strain DSM 22959 chromosome, complete genome	CP042830.1
					Akkermansia muciniphila isolate MGYG-HGUT-02454 genome assembly, chromosome: 1	LR699001.1
					Akkermansia muciniphila strain 139 chromosome, complete genome	CP036293.1
			4	CGCCAGTGTGATGGATATCTGCAGAATTCGCCCTTCGATAATTCCGCTATTTTTTCGCAGAGGTCTTCATAGGGCCATCCGGAGGCCGCCGCCGCCTTGGGAAGCAGGCTGGAAGGGGTCATGCCGGGAATGGTGTTGATTTCCAGCACGAAGAAGGGCGAATTCCAGCACACTGGCGGCCGTTACTAGTGGATCCGAGCTCGGTACCAAGCTTGGCGTAATCATGGTCATAGCTGTTTCCTGTGTGAATTKGTTATCCGCA	Akkermansia muciniphila strain JCM 30893 chromosome, complete genome	CP048438.1
					Akkermansia muciniphila JCM 30893 DNA, complete genome	AP021898.1
					Akkermansia muciniphila strain DSM 22959 chromosome, complete genome	CP042830.1
					Akkermansia muciniphila isolate MGYG-HGUT-02454 genome assembly, chromosome: 1	LR699001.1
					Akkermansia muciniphila strain 139 chromosome, complete genome	CP036293.1
			5	CGCCAGTGTGATGGATATCTGCAGAATTCGCCCTTCTTCGTTGCTGGAAATCAACACCATTCCCGGCATGACCCCTTCCAGCCTGCTTCCCAAGGCGGCGGCGGCCTCCGGATGGCCCTATGAAGACCTCTGCGAAAAAATAGCGGAATTATCGAAGGGCGAATTCCAGCACACTGGCGGCCGTTACTAGTGGATCCGAGCTCGGTACCAAGCTTGGCGTAATCATGGTCATAGCTGTTTCCTGTGTGAAATTGTTATCCGCA	Akkermansia muciniphila strain JCM 30893 chromosome, complete genome	CP048438.1
					Akkermansia muciniphila JCM 30893 DNA, complete genome	AP021898.1
					Akkermansia muciniphila strain DSM 22959 chromosome, complete genome	CP042830.1
					Akkermansia muciniphila isolate MGYG-HGUT-02454 genome assembly, chromosome: 1	LR699001.1
					Akkermansia muciniphila strain 139 chromosome, complete genome	CP036293.1
2	Candidate 100 (Ct: 19.05)	Akk_Ma_02	1	CGCCAGTGTGATGGATATCTGCAGAATTCGCCCTTCTTCGTGCTGGAAATCAACACCATTCCCGGCATGACCCCTTCCAGCCTGCTTCCCAAGGCGGCGGCGGCCTCCGGATGGCCCTATGAAGACCTCTGCGAAAAAATAGCGGAATTATCGAAGGGCGAATTCCAGCACACTGGCGGCCGTTACTAGTGGATCCGAGCTCGGTACCAAGCTTGGCGTAATCATGGTCATAGCTGTTTCCTGTGTGAAATTGTTATCCGCA	Akkermansia muciniphila strain JCM 30893 chromosome, complete genome	CP048438.1
					Akkermansia muciniphila JCM 30893 DNA, complete genome	AP021898.1
					Akkermansia muciniphila strain DSM 22959 chromosome, complete genome	CP042830.1
					Akkermansia muciniphila isolate MGYG-HGUT-02454 genome assembly, chromosome: 1	LR699001.1
					Akkermansia muciniphila strain 139 chromosome, complete genome	CP036293.1
			2	CGCCAGTGTGATGGATATCTGCAGAATTCGCCCTTCTTCGTGCTGGAAATCAACACCATTCCCGGCATGACCCCTTCCAGCCTGCTTCCCAAGGCGGCGGCGGCCTCCGGATGGCCCTATGAAGACCTCTGCGAAAAAATAGCGGAATTATCGAAGGGCGAATTCCAGCACACTGGCGGCCGTTACTAGTGGATCCGAGCTCGGTACCAAGCTTGGCGTAATCATGGTCATAGCTGTTTCCTGTGTGAAATTGTTATCCGCA	Akkermansia muciniphila strain JCM 30893 chromosome, complete genome	CP048438.1
					Akkermansia muciniphila JCM 30893 DNA, complete genome	AP021898.1
					Akkermansia muciniphila strain DSM 22959 chromosome, complete genome	CP042830.1
					Akkermansia muciniphila isolate MGYG-HGUT-02454 genome assembly, chromosome: 1	LR699001.1
					Akkermansia muciniphila strain 139 chromosome, complete genome	CP036293.1
			3	CGCCAGTGTGATGGATATCTGCAGAATTCGCCCTTCTTCGTGCTGGAAATCAACACCATTCCCGGCATGACCCCTTCCAGCCTGCTTCCCAAGGCGGCGGCGGCCTCCGGATGGCCCTATGAAGACCTCTGCGAAAAAATAGCGGAATTATCGAAGGGCGAATTCCAGCACACTGGCGGCCGTTACTAGTGGATCCGAGCTCGGTACCAAGCTTGGCGTAATCATGGTCATAGCTGTTTCCTGTGTGAAATTGTTATCCGCA	Akkermansia muciniphila strain JCM 30893 chromosome, complete genome	CP048438.1
					Akkermansia muciniphila JCM 30893 DNA, complete genome	AP021898.1
					Akkermansia muciniphila strain DSM 22959 chromosome, complete genome	CP042830.1
					Akkermansia muciniphila isolate MGYG-HGUT-02454 genome assembly, chromosome: 1	LR699001.1
					Akkermansia muciniphila strain 139 chromosome, complete genome	CP036293.1
			4	CGCCAGTGTGATGGATATCTGCMGAATTCGCCCTTCTTCGTGCTGGAAATCAACACCATTCCCGGCATGACCCCTTCCAGCCTGCTTCCCAAGGCGGCGGCGGCCTCCGGATGGCCCTATGAAGACCTCTGCGAAAAAATAGCGGAATTATCGAAGGGCGAATTCCAGCACACTGGCGGCCGTTACTAGTGGATCCGAGCTCGGTACCAAGCTTGGCGTAATCATGGTCATAGCTGTTTCCTGTGTGAAATTGTTATCCGCA	Akkermansia muciniphila strain JCM 30893 chromosome, complete genome	CP048438.1
					Akkermansia muciniphila JCM 30893 DNA, complete genome	AP021898.1
					Akkermansia muciniphila strain DSM 22959 chromosome, complete genome	CP042830.1
					Akkermansia muciniphila isolate MGYG-HGUT-02454 genome assembly, chromosome: 1	LR699001.1
					Akkermansia muciniphila strain 139 chromosome, complete genome	CP036293.1
			5	CGCCAGTGTGATGGATATCTSCMGAATTCGCCCTTCGATAATTCCGCTATTTTTTCGCAGAGGTCTTCATAGGGCCATCCGGAGGCCGCCGCCGCCTTGGGAAGCAGGCTGGAAGGGGTCATGCCGGGAATGGTGTTGATTTCCAGCACGAAGAAGGGCGAATTCCAGCACACTGGCGGCCGTTACTAGTGGATCCGAGCTCGGTACCAAGCTTGGCGTAATCATGGTCATAGCTGTTTCCTGTGTGAAATTGTTATCCGCA	Akkermansia muciniphila strain JCM 30893 chromosome, complete genome	CP048438.1
					Akkermansia muciniphila JCM 30893 DNA, complete genome	AP021898.1
					Akkermansia muciniphila strain DSM 22959 chromosome, complete genome	CP042830.1
					Akkermansia muciniphila isolate MGYG-HGUT-02454 genome assembly, chromosome: 1	LR699001.1
					Akkermansia muciniphila strain 139 chromosome, complete genome	CP036293.1
3	Candidate 67 (Ct: 19.23)	Akk_Ma_03	1	CGCCAGTGTGATGGATATCTGCAGAATTCGCCCTTCTTCGTGCTGGAAATCAACACCATTCCCGGCATGACCCCTTCCAGCCTGCTTCCCAAGGCGGCGGCGGCCTCCGGATGGCCCTATGAAGACCTCTGCGAAAAAATAGCGGAATTATCGAAGGGCGAATTCCAGCACACTGGCGGCCGTTACTAGTGGATCCGAGCTCGGTACCAAGCTTGGCGTAATCATGGTCATAGCTGTTTCCTGTGTGAAATTGTTATCCGCA	Akkermansia muciniphila strain JCM 30893 chromosome, complete genome	CP048438.1
					Akkermansia muciniphila JCM 30893 DNA, complete genome	AP021898.1
					Akkermansia muciniphila strain DSM 22959 chromosome, complete genome	CP042830.1
					Akkermansia muciniphila isolate MGYG-HGUT-02454 genome assembly, chromosome: 1	LR699001.1
					Akkermansia muciniphila strain 139 chromosome, complete genome	CP036293.1
			2	CGCCAGTGTGATGGATATCTGCAGAATTCGCCCTTCTTCGTGCTGGAAATCAACACCATTCCCGGCATGACCCCTTCCAGCCTGCTTCCCAAGGCGGCGGCGGCCTCCGGATGGCCCTATGAAGACCTCTGCGAAAAAATAGCGGAATTATCGAAGGGCGAATTCCAGCACACTGGCGGCCGTTACTAGTGGATCCGAGCTCGGTACCAAGCTTGGCGTAATCATGGTCATAGCTGTTTCCTGTGTGAAATTGTTATCCGCA	Akkermansia muciniphila strain JCM 30893 chromosome, complete genome	CP048438.1
					Akkermansia muciniphila JCM 30893 DNA, complete genome	AP021898.1
					Akkermansia muciniphila strain DSM 22959 chromosome, complete genome	CP042830.1
					Akkermansia muciniphila isolate MGYG-HGUT-02454 genome assembly, chromosome: 1	LR699001.1
					Akkermansia muciniphila strain 139 chromosome, complete genome	CP036293.1
			3	CGCCAGTGTGATGGATATCTGCAGAATTCGCCCTTCTTCGTGCTGGAAATCAACACCATTCCCGGCATGACCCCTTCCAGCCTGCTTCCCAAGGCGGCGGCGGCCTCCGGATGGCCCTATGAAGACCTCTGCGAAAAAATAGCGGAATTATCGAAGGGCGAATTCCAGCACACTGGCGGCCGTTACTAGTGGATCCGAGCTCGGTACCAAGCTTGGCGTAATCATGGTCATAGCTGTTTCCTGTGTGAAATTGTTATCCGCAATA	Akkermansia muciniphila strain JCM 30893 chromosome, complete genome	CP048438.1
					Akkermansia muciniphila JCM 30893 DNA, complete genome	AP021898.1
					Akkermansia muciniphila strain DSM 22959 chromosome, complete genome	CP042830.1
					Akkermansia muciniphila isolate MGYG-HGUT-02454 genome assembly, chromosome: 1	LR699001.1
					Akkermansia muciniphila strain 139 chromosome, complete genome	CP036293.1
			4	CGCCAGTGTGATGGATATCTGCAGAATTCGCCCTTCTTCGTGCTGGAAATCAACACCATTCCCGGCATGACCCCTTCCAGCCTGCTTCCCAAGGCGGCGGCGGCCTCCGGATGGCCCTATGAAGACCTCTGCGAAAAAATAGCGGAATTATCGAAGGGCGAATTCCAGCACACTGGCGGCCGTTACTAGTGGATCCGAGCTCGGTACCAAGCTTGGCGTAATCATGGTCATAGCTGTTTCCTGTGTGAAATTGTTATCCGCAA	Akkermansia muciniphila strain JCM 30893 chromosome, complete genome	CP048438.1
					Akkermansia muciniphila JCM 30893 DNA, complete genome	AP021898.1
					Akkermansia muciniphila strain DSM 22959 chromosome, complete genome	CP042830.1
					Akkermansia muciniphila isolate MGYG-HGUT-02454 genome assembly, chromosome: 1	LR699001.1
					Akkermansia muciniphila strain 139 chromosome, complete genome	CP036293.1
			5	CGCCAGTGTGATGGATATCTGCAGAATTCGCCCTTCTTCGTGCTGGAAATCAACACCATTCCCGGCATGACCCCTTCCAGCCTGCTTCCCAAGGCGGCGGCGGCCTCCGGATGGCCCTATGAAGACCTCTGCGAAAAAATAGCGGAATTATCGAAGGGCGAATTCCAGCACACTGGCGGCCGTTACTAGTGGATCCGAGCTCGGTACCAAGCTTGGCGTAATCATGGTCATAGCTGTTTCCTGTGTGAAATTGTTATCCGCA	Akkermansia muciniphila strain JCM 30893 chromosome, complete genome	CP048438.1
					Akkermansia muciniphila JCM 30893 DNA, complete genome	AP021898.1
					Akkermansia muciniphila strain DSM 22959 chromosome, complete genome	CP042830.1
					Akkermansia muciniphila isolate MGYG-HGUT-02454 genome assembly, chromosome: 1	LR699001.1
					Akkermansia muciniphila strain 139 chromosome, complete genome	CP036293.1
4	Candidate 86 (Ct: 19.69)	Akk_Ma_04	1	CGCCAGTGTGATGGATATCTGCAGAATTCGCCCTTCTTCGTGCTGGAAATCAACACCATTCCCGGCATGACCCCTTCCAGCCTGCTTCCCAAGGCGGCGGCGGCCTCCGGATGGCCCTATGAAGACCTCTGCGAAAAAATAGCGGAATTATCGAAGGGCGAATTCCAGCACACTGGCGGCCGTTACTAGTGGATCCGAGCTCGGTACCAAGCTTGGCGTAATCATGGTCATAGCTGTTTCCTGTGTGAAATTGTTATCCGCA	Akkermansia muciniphila strain JCM 30893 chromosome, complete genome	CP048438.1
					Akkermansia muciniphila JCM 30893 DNA, complete genome	AP021898.1
					Akkermansia muciniphila strain DSM 22959 chromosome, complete genome	CP042830.1
					Akkermansia muciniphila isolate MGYG-HGUT-02454 genome assembly, chromosome: 1	LR699001.1
					Akkermansia muciniphila strain 139 chromosome, complete genome	CP036293.1
			2	CGCCAGTGTGATGGATATCTGCAGAATTCGCCCTTCGATAATTCCGCTATTTTTTCGCAGAGGTCTTCATAGGGCCATCCGGAGGCCGCCGCCGCCTTGGGAAGCAGGCTGGAAGGGGTCATGCCGGGAATGGTGTTGATTTCCAGCACGAAGAAGGGCGAATTCCAGCACACTGGCGGCCGTTACTAGTGGATCCGAGCTCGGTACCAAGCTTGGCGTAATCATGGTCATAGCTGTTTCCTGTGTGAAATTGTTATCCGCA	Akkermansia muciniphila strain JCM 30893 chromosome, complete genome	CP048438.1
					Akkermansia muciniphila JCM 30893 DNA, complete genome	AP021898.1
					Akkermansia muciniphila strain DSM 22959 chromosome, complete genome	CP042830.1
					Akkermansia muciniphila isolate MGYG-HGUT-02454 genome assembly, chromosome: 1	LR699001.1
					Akkermansia muciniphila strain 139 chromosome, complete genome	CP036293.1
			3	CGCCAGTGTGATGGATATCTGCAGAATTCGCCCTTCGATAATTCCGCTATTTTTTCGCAGAGGTCTTCATAGGGCCATCCGGAGGCCGCCGCCGCCTTGGGAAGCAGGCTGGAAGGGGTCATGCCGGGAATGGTGTTGATTTCCAGCACGAAGAAGGGCGAATTCCAGCACACTGGCGGCCGTTACTAGTGGATCCGAGCTCGGTACCAAGCTTGGCGTAATCATGGTCATAGCTGTTTCCTGTGTGAAATTGTTATCCGCA	Akkermansia muciniphila strain JCM 30893 chromosome, complete genome	CP048438.1
					Akkermansia muciniphila JCM 30893 DNA, complete genome	AP021898.1
					Akkermansia muciniphila strain DSM 22959 chromosome, complete genome	CP042830.1
					Akkermansia muciniphila isolate MGYG-HGUT-02454 genome assembly, chromosome: 1	LR699001.1
					Akkermansia muciniphila strain 139 chromosome, complete genome	CP036293.1
			4	CGCCAGTGTGATGGATATCTGCAGAATTCGCCCTTCGATAATTCCGCTATTTTTTCGCAGAGGTCTTCATAGGGCCATCCGGAGGCCGCCGCCGCCTTGGGAAGCAGGCTGGAAGGGGTCATGCCTGGAATGGTGTTGATTTCCAGCACGAAGAAGGGCGAATTCCAGCACACTGGCGGCCGTTACTAGTGGATCCGAGCTCGGTACCAAGCTTGGCGTAATCATGGTCATAGCTGTTTCCTGTGTGAAATTGTTATCCGCA	Akkermansia muciniphila strain JCM 30893 chromosome, complete genome	CP048438.1
					Akkermansia muciniphila JCM 30893 DNA, complete genome	AP021898.1
					Akkermansia muciniphila strain DSM 22959 chromosome, complete genome	CP042830.1
					Akkermansia muciniphila isolate MGYG-HGUT-02454 genome assembly, chromosome: 1	LR699001.1
					Akkermansia muciniphila strain 139 chromosome, complete genome	CP036293.1
			5	CGCCAGTGTGATGGATATCTGCAGAATTCGCCCTTCTTCGTGCTGGAAATCAACACCATTCCCGGCATGACCCCTTCCAGCCTGCTTCCCAAGGCGGCGGCGGCCTCCGGATGGCCCTATGAAGACCTCTGCGAAAAAATAGCGGAATTATCGAAGGGCGAATTCCAGCACACTGGCGGCCGTTACTAGTGGATCCGAGCTCGGTACCAAGCTTGGCGTAATCATGGTCATAGCTGTTTCCTGTGTGAAATTGTTATCCGCAA	Akkermansia muciniphila strain JCM 30893 chromosome, complete genome	CP048438.1
					Akkermansia muciniphila JCM 30893 DNA, complete genome	AP021898.1
					Akkermansia muciniphila strain DSM 22959 chromosome, complete genome	CP042830.1
					Akkermansia muciniphila isolate MGYG-HGUT-02454 genome assembly, chromosome: 1	LR699001.1
					Akkermansia muciniphila strain 139 chromosome, complete genome	CP036293.1
5	Candidate 19 (Ct: 20.02)	Akk_Ma_05	1	CGCCAGTGTGATGGATATCTGCAGAATTCGCCCTTCGATAATTCCGCTATTTTTTCGCAGAGGTCTTCATAGGGCCATCCGGAGGCCGCCGCCGCCTTGGGAAGCAGGCTGGAAGGGGTCATGCCGGGAATGGTGTTGATTTCCAGCACGAAGAAGGGCGAATTCCAGCACACTGGCGGCCGTTACTAGTGGATCCGAGCTCGGTACCAAGCTTGGCGTAATCATGGTCATAGCTGTTTCCTGTGTGAAATTGTTATCCGCAA	Akkermansia muciniphila strain JCM 30893 chromosome, complete genome	CP048438.1
					Akkermansia muciniphila JCM 30893 DNA, complete genome	AP021898.1
					Akkermansia muciniphila strain DSM 22959 chromosome, complete genome	CP042830.1
					Akkermansia muciniphila isolate MGYG-HGUT-02454 genome assembly, chromosome: 1	LR699001.1
					Akkermansia muciniphila strain 139 chromosome, complete genome	CP036293.1
			2	CGCCAGTGTGATGGATATCTGCAGAATTCGCCCTTCGATAATTCCGCTATTTTTTCGCAGAGGTCTTCATAGGGCCATCCGGAGGCCGCCGCCGCCTTGGGAAGCAGGCTGGAAGGGGTCATGCCGGGAATGGTGTTGATTTCCAGCACGAAGAAGGGCGAATTCCAGCACACTGGCGGCCGTTACTAGTGGATCCGAGCTCGGTACCAAGCTTGGCGTAATCATGGTCATAGCTGTTTCCTGTGTGAAATWGTTATCCGCAA	Akkermansia muciniphila strain JCM 30893 chromosome, complete genome	CP048438.1
					Akkermansia muciniphila JCM 30893 DNA, complete genome	AP021898.1
					Akkermansia muciniphila strain DSM 22959 chromosome, complete genome	CP042830.1
					Akkermansia muciniphila isolate MGYG-HGUT-02454 genome assembly, chromosome: 1	LR699001.1
					Akkermansia muciniphila strain 139 chromosome, complete genome	CP036293.1
			3	CGCCAGTGTGATGGATATCTGCAGAATTCGCCCTTCTTCGTGCTGGAAATCAACACCATTCCCGGCATGACCCCTTCCAGCCTGCTTCCCAAGGCGGCGGCGGCCTCCGGATGGCCCTATGAAGACCTCTGCGAAAAAATAGCGGAATTATCGAAGGGCGAATTCCAGCACACTGGCGGCCGTTACTAGTGGATCCGAGCTCGGTACCAAGCTTGGCGTAATCATGGTCATAGCTGTTTCCTGTGTGAAATTGTTATCCGCA	Akkermansia muciniphila strain JCM 30893 chromosome, complete genome	CP048438.1
					Akkermansia muciniphila JCM 30893 DNA, complete genome	AP021898.1
					Akkermansia muciniphila strain DSM 22959 chromosome, complete genome	CP042830.1
					Akkermansia muciniphila isolate MGYG-HGUT-02454 genome assembly, chromosome: 1	LR699001.1
					Akkermansia muciniphila strain 139 chromosome, complete genome	CP036293.1
			4	CGCCAGTGTGATGGATATCTGCAGAATTCGCCCTTCTTCGTGCTGGAAATCAACACCATTCCCGGCATGACCCCTTCCAGCCTGCTTCCCAAGGCGGCGGCGGCCTCCGGATGGCCCTATGAAGACCTCTGCGAAAAAATAGCGGAATTATCGAAGGGCGAATTCCAGCACACTGGCGGCCGTTACTAGTGGATCCGAGCTCGGTACCAAGCTTGGCGTAATCATGGTCATAGCTGTTTCCTGTGTGAAATTGTTATCCGCA	Akkermansia muciniphila strain JCM 30893 chromosome, complete genome	CP048438.1
					Akkermansia muciniphila JCM 30893 DNA, complete genome	AP021898.1
					Akkermansia muciniphila strain DSM 22959 chromosome, complete genome	CP042830.1
					Akkermansia muciniphila isolate MGYG-HGUT-02454 genome assembly, chromosome: 1	LR699001.1
					Akkermansia muciniphila strain 139 chromosome, complete genome	CP036293.1
			5	CGCCAGTGTGATGGATATCTGCAGAATTCGCCCTTCTTCGTGCTGGAAATCAACACCATTCCCGGCATGACCCCTTCCAGCCTGCTTCCCAAGGCGGCGGCGGCCTCCGGATGGCCCTATGAAGACCTCTGCGAAAAAATAGCGGAATTATCGAAGGGCGAATTCCAGCACACTGGCGGCCGTTACTAGTGGATCCGAGCTCGGTACCAAGCTTGGCGTAATCATGGTCATAGCTGTTTCCTGTGTGAAATTGTTATCCGCA	Akkermansia muciniphila strain JCM 30893 chromosome, complete genome	CP048438.1
					Akkermansia muciniphila JCM 30893 DNA, complete genome	AP021898.1
					Akkermansia muciniphila strain DSM 22959 chromosome, complete genome	CP042830.1
					Akkermansia muciniphila isolate MGYG-HGUT-02454 genome assembly, chromosome: 1	LR699001.1
					Akkermansia muciniphila strain 139 chromosome, complete genome	CP036293.1

## Sheet: Akkermansia_Low
Supplementary Table S7. Bacterial identification results of each genus by BLAST test
Akkermansia sp. Low Top 5 BLAST Results
No.	Sample	Name	Colony no.	Input sequence	Description	Accession
1	Candidate 29 (Ct: 32.68)	Akk_Mi_01	1	CGCCAGTGTGATGGATATCTGCAGAATTCGCCCTTCTTCGTGCTGGAAATCAACACCATTCCCGGCATGACCCCTTCCAGCCTGCTTCCCAAGGCGGCGGCGGCCTCCGGATGGCCCTATGAAGACCTCTGCGAAAAAATAGCGGAATTATCGAAGGGCGAATTCCAGCACACTGGCGGCCGTTACTAGTGGATCCGAGCTCGGTACCAAGCTTGGCGTAATCATGGTCATAGCTGTTTCCTGTGTGAAATKGTTATCCGCAA	Akkermansia muciniphila strain JCM 30893 chromosome, complete genome	CP048438.1
					Akkermansia muciniphila JCM 30893 DNA, complete genome	AP021898.1
					Akkermansia muciniphila strain DSM 22959 chromosome, complete genome	CP042830.1
					Akkermansia muciniphila isolate MGYG-HGUT-02454 genome assembly, chromosome: 1	LR699001.1
					Akkermansia muciniphila strain 139 chromosome, complete genome	CP036293.1
			2	CGCCAGTGTGATGGATATCTGCAGAATTCGCCCTTCTTCGTGCTGGAAATCAACACCATTCCCGGCATGACCCCTTCCAGCCTGCTTCCCAAGGCGGCGGCGGCCTCCGGATGGCCCTATGAAGACCTCTGCGAAAAAATAGCGGAATTATCGAAGGGCGAATTCCAGCACACTGGCGGCCGTTACTAGTGGATCCGAGCTCGGTACCAAGCTTGGCGTAATCATGGTCATAGCTGTTTCCTGTGTGAAATTGTTATCCGCA	Akkermansia muciniphila strain JCM 30893 chromosome, complete genome	CP048438.1
					Akkermansia muciniphila JCM 30893 DNA, complete genome	AP021898.1
					Akkermansia muciniphila strain DSM 22959 chromosome, complete genome	CP042830.1
					Akkermansia muciniphila isolate MGYG-HGUT-02454 genome assembly, chromosome: 1	LR699001.1
					Akkermansia muciniphila strain 139 chromosome, complete genome	CP036293.1
			3	CGCCAGTGTGATGGATATCTGCAGAATTCGCCCTTCTTCGTGCTGGAAATCAACACCATTCCCGGCATGACCCCTTCCAGCCTGCTTCCCAAGGCGGCGGCGGCCTCCGGATGGCCCTATGAAGACCTCTGCGAAAAAATAGCGGAATTATCGAAGGGCGAATTCCAGCACACTGGCGGCCGTTACTAGTGGATCCGAGCTCGGTACCAAGCTTGGCGTAATCATGGTCATAGCTGTTTCCTGKGTGAAAWTGTTATCCGCAAA	Akkermansia muciniphila strain JCM 30893 chromosome, complete genome	CP048438.1
					Akkermansia muciniphila JCM 30893 DNA, complete genome	AP021898.1
					Akkermansia muciniphila strain DSM 22959 chromosome, complete genome	CP042830.1
					Akkermansia muciniphila isolate MGYG-HGUT-02454 genome assembly, chromosome: 1	LR699001.1
					Akkermansia muciniphila strain 139 chromosome, complete genome	CP036293.1
			4	CGCCAGTGTGATGGATATCTGCAGAATTCGCCCTTCTTCGTGCTGGAAATCAACACCATTCCCGGCATGACCCCTTCCAGCCTGCTTCCCAAGGCGGCGGCGGCCTCCGGATGGCCCTATGAAGACCTCTGCGAAAAAATAGCGGAATTATCGAAGGGCGAATTCCAGCACACTGGCGGCCGTTACTAGTGGATCCGAGCTCGGTACCAAGCTTGGCGTAATCATGGTCATAGCTGTTTCCTGTGTGAAATTGRWTATCCGCAA	Akkermansia muciniphila strain JCM 30893 chromosome, complete genome	CP048438.1
					Akkermansia muciniphila JCM 30893 DNA, complete genome	AP021898.1
					Akkermansia muciniphila strain DSM 22959 chromosome, complete genome	CP042830.1
					Akkermansia muciniphila isolate MGYG-HGUT-02454 genome assembly, chromosome: 1	LR699001.1
					Akkermansia muciniphila strain 139 chromosome, complete genome	CP036293.1
			5	CGCCAGTGTGATGGATATCTGCAGAATTCGCCCTTCTTCGTGCTGGAAATCAACACCATTCCCGGCATGACCCCTTCCAGCCTGCTTCCCAAGGCGGCGGCGGCCTCCGGATGGCCCTATGAAGACCTCTGCGAAAAAATAGCGGAATTATCGAAGGGCGAATTCCAGCACACTGGCGGCCGTTACTAGTGGATCCGAGCTCGGTACCAAGCTTGGCGTAATCATGGTCATAGCTGTTTCCTGTGTGAAATTGTTATCCGCA	Akkermansia muciniphila strain JCM 30893 chromosome, complete genome	CP048438.1
					Akkermansia muciniphila JCM 30893 DNA, complete genome	AP021898.1
					Akkermansia muciniphila strain DSM 22959 chromosome, complete genome	CP042830.1
					Akkermansia muciniphila isolate MGYG-HGUT-02454 genome assembly, chromosome: 1	LR699001.1
					Akkermansia muciniphila strain 139 chromosome, complete genome	CP036293.1
2	Candidate 24 (Ct: 32.67)	Akk_Mi_02	1	CGCCAGTGTGATGGATATCTGCAGAATTCGCCCTTCTTCGTGCTGGAAATCAACACCATTCCCGGCATGACCCCTTCCAGCCTGCTTCCCAAGGCGGCGGCGGCCTCCGGATGGCCCTATGAAGACCTCTGCGAAAAAATAGCGGAATTATCGAAGGGCGAATTCCAGCACACTGGCGGCCGTTACTAGTGGATCCGAGCTCGGTACCAAGCTTGGCGTAATCATGGTCATAGCTGTTTCCTGTGTGAAATKGTTATCCGCAA	Akkermansia muciniphila strain JCM 30893 chromosome, complete genome	CP048438.1
					Akkermansia muciniphila JCM 30893 DNA, complete genome	AP021898.1
					Akkermansia muciniphila strain DSM 22959 chromosome, complete genome	CP042830.1
					Akkermansia muciniphila isolate MGYG-HGUT-02454 genome assembly, chromosome: 1	LR699001.1
					Akkermansia muciniphila strain 139 chromosome, complete genome	CP036293.1
			2	CGCCAGTGTGATGGATATCTGCAGAATTCGCCCTTCGATAATTCCGCTATTTTTTCGCAGAGGTCTTCATAGGGCCATCCGGAGGCCGCCGCCGCCTTGGGAAGCAGGCTGGAAGGGGTCATGCCGGGAATGGTGTTGATTTCCAGCACGAAGAAGGGCGAATTCCAGCACACTGGCGGCCGTTACTAGTGGATCCGAGCTCGGTACCAAGCTTGGCGTAATCATGGTCATAGCTGTTTCCTGTGTGAAATKGTTATCCGCA	Akkermansia muciniphila strain JCM 30893 chromosome, complete genome	CP048438.1
					Akkermansia muciniphila JCM 30893 DNA, complete genome	AP021898.1
					Akkermansia muciniphila strain DSM 22959 chromosome, complete genome	CP042830.1
					Akkermansia muciniphila isolate MGYG-HGUT-02454 genome assembly, chromosome: 1	LR699001.1
					Akkermansia muciniphila strain 139 chromosome, complete genome	CP036293.1
			3	CGCCAGTGTGATGGATATCTGCAGAATTCGCCCTTCGATAATTCCGCTATTTTTTCGCAGAGGTCTTCATAGGGCCATCCGGAGGCCGCCGCCGCCTTGGGAAGCAGGCTGGAAGGGGTCATGCCGGGAATGGTGTTGATTTCCAGCACGAAGAAGGGCGAATTCCAGCACACTGGCGGCCGTTACTAGTGGATCCGAGCTCGGTACCAAGCTTGGCGTAATCATGGTCATAGCTGTTTCCTGTGTGAAATKGTTATCCGCA	Akkermansia muciniphila strain JCM 30893 chromosome, complete genome	CP048438.1
					Akkermansia muciniphila JCM 30893 DNA, complete genome	AP021898.1
					Akkermansia muciniphila strain DSM 22959 chromosome, complete genome	CP042830.1
					Akkermansia muciniphila isolate MGYG-HGUT-02454 genome assembly, chromosome: 1	LR699001.1
					Akkermansia muciniphila strain 139 chromosome, complete genome	CP036293.1
			4	CGCCAGTGTGATGGATATCTGCAGAATTCGCCCTTCTTCGTGCTGGAAATCAACACCATTCCCGGCATGACCCCTTCCAGCCTGCTTCCCAAGGCGGCGGCGGCCTCCGGATGGCCCTATGAAGACCTCTGCGAAAAAATAGCGGAATTATCGAAGGGCGAATTCCAGCACACTGGCGGCCGTTACTAGTGGATCCGAGCTCGGTACCAAGCTTGGCGTAATCATGGTCATAGCTGTTTCCTGTGTGAAATTGTTATCCGCA	Akkermansia muciniphila strain JCM 30893 chromosome, complete genome	CP048438.1
					Akkermansia muciniphila JCM 30893 DNA, complete genome	AP021898.1
					Akkermansia muciniphila strain DSM 22959 chromosome, complete genome	CP042830.1
					Akkermansia muciniphila isolate MGYG-HGUT-02454 genome assembly, chromosome: 1	LR699001.1
					Akkermansia muciniphila strain 139 chromosome, complete genome	CP036293.1
			5	CGCCAGTGTGATGGATATCTGCAGAATTCGCCCTTCTTCGTGCTGGAAATCAACACCATTCCCGGCATGACCCCTTCCAGCCTGCTTCCCAAGGCGGCGGCGGCCTCCGGATGGCCCTATGAAGACCTCTGCGAAAAAATAGCGGAATTATCGAAGGGCGAATTCCAGCACACTGGCGGCCGTTACTAGTGGATCCGAGCTCGGTACCAAGCTTGGCGTAATCATGGTCATAGCTGTTTCCTGTGTGAAWTTGTTATCCGCAA	Akkermansia muciniphila strain JCM 30893 chromosome, complete genome	CP048438.1
					Akkermansia muciniphila JCM 30893 DNA, complete genome	AP021898.1
					Akkermansia muciniphila strain DSM 22959 chromosome, complete genome	CP042830.1
					Akkermansia muciniphila isolate MGYG-HGUT-02454 genome assembly, chromosome: 1	LR699001.1
					Akkermansia muciniphila strain 139 chromosome, complete genome	CP036293.1
3	Candidate 78 (Ct: 32.66)	Akk_Mi_03	1	CGCCAGTGTGATGGATATCTGCAGAATTCGCCCTTCTTCGTGCTGGAAATCAACACCATTCCCGGCATGACCCCTTCCAGCCTGCTTCCCAAGGCGGCGGCGGCCTCCGGATGGCCCTATGAAGACCTCTGCGAAAAAATAGCGGAATTATCGAAGGGCGAATTCCAGCACACTGGCGGCCGTTACTAGTGGATCCGAGCTCGGTACCAAGCTTGGCGTAATCATGGTCATAGCTGTTTCCTGTGTGAATTGTTATCCGCAA	Akkermansia muciniphila strain JCM 30893 chromosome, complete genome	CP048438.1
					Akkermansia muciniphila JCM 30893 DNA, complete genome	AP021898.1
					Akkermansia muciniphila strain DSM 22959 chromosome, complete genome	CP042830.1
					Akkermansia muciniphila isolate MGYG-HGUT-02454 genome assembly, chromosome: 1	LR699001.1
					Akkermansia muciniphila strain 139 chromosome, complete genome	CP036293.1
			2	CGCCAGTGTGATGGATATCTGCAGAATTCGCCCTTCGATAATTCCGCTATTTTTTCGCAGAGGTCTTCATAGGGCCATCCGGAGGCCGCCGCCGCCTTGGGAAGCAGGCTGGAAGGGGTCATGCCGGGAATGGTGTTGATTTCCAGCACGAAGAAGGGCGAATTCCAGCACACTGGCGGCCGTTACTAGTGGATCCGAGCTCGGTACCAAGCTTGGCGTAATCATGGTCATAGCTGTTTCCTGTGTGAAATTGTTATCCGCA	Akkermansia muciniphila strain JCM 30893 chromosome, complete genome	CP048438.1
					Akkermansia muciniphila JCM 30893 DNA, complete genome	AP021898.1
					Akkermansia muciniphila strain DSM 22959 chromosome, complete genome	CP042830.1
					Akkermansia muciniphila isolate MGYG-HGUT-02454 genome assembly, chromosome: 1	LR699001.1
					Akkermansia muciniphila strain 139 chromosome, complete genome	CP036293.1
			3	CGCCAGTGTGATGGATATCTGCAGAATTCGCCCTTCTTCGTGCTGGAAATCAACACCATTCCCGGCATGACCCCTTCCAGCCTGCTTCCCAAGGCGGCGGCGGCCTCCGGATGGCCCTATGAAGACCTCTGCGAAAAAATAGCGGAATTATCGAAGGGCGAATTCCAGCACACTGGCGGCCGTTACTAGTGGATCCGAGCTCGGTACCAAGCTTGGCGTAATCATGGTCATAGCTGTTTCCTGTGTGAAATTGTTATCCGCA	Akkermansia muciniphila strain JCM 30893 chromosome, complete genome	CP048438.1
					Akkermansia muciniphila JCM 30893 DNA, complete genome	AP021898.1
					Akkermansia muciniphila strain DSM 22959 chromosome, complete genome	CP042830.1
					Akkermansia muciniphila isolate MGYG-HGUT-02454 genome assembly, chromosome: 1	LR699001.1
					Akkermansia muciniphila strain 139 chromosome, complete genome	CP036293.1
			4	CGCCAGTGTGATGGATATCTGCRGAATTCKCCCTTCTTCGTGCTGGAAATCAACACCATTCCCGGCATGACCCCTTCCAGCCTGCTTCCCAAGGCGGCGGCGGCCTCCGGATGGCCCTATGAAGACCTCTGCGAAAAAATAGCGGAATTATCGAAGGGCGAATTCCAGCACACTGGCGGCCGTTACTAGTGGATCCGAGCTCGGTACCAAGCTTGGCGTAATCATGGTCATAGCTGTTTCCTGTGTGAAATKGTTATCCGCA	Akkermansia muciniphila strain JCM 30893 chromosome, complete genome	CP048438.1
					Akkermansia muciniphila JCM 30893 DNA, complete genome	AP021898.1
					Akkermansia muciniphila strain DSM 22959 chromosome, complete genome	CP042830.1
					Akkermansia muciniphila isolate MGYG-HGUT-02454 genome assembly, chromosome: 1	LR699001.1
					Akkermansia muciniphila strain 139 chromosome, complete genome	CP036293.1
			5	CGCCAGTGTGATGGATATCTGCAGAATTCGCCCTTCGATAATTCCGCTATTTTTTCGCAGAGGTCTTCATAGGGCCATCCGGAGGCCGCCGCCGCCTTGGGAAGCAGGCTGGAAGGGGTCATGCCGGGAATGGTGTTGATTTCCAGCACGAAGAAGGGCGAATTCCAGCACACTGGCGGCCGTTACTAGTGGATCCGAGCTCGGTACCAAGCTTGGCGTAATCATGGTCATAGCTGTTTCCTGTGTGAAAATGTTATCCGCA	Akkermansia muciniphila strain JCM 30893 chromosome, complete genome	CP048438.1
					Akkermansia muciniphila JCM 30893 DNA, complete genome	AP021898.1
					Akkermansia muciniphila strain DSM 22959 chromosome, complete genome	CP042830.1
					Akkermansia muciniphila isolate MGYG-HGUT-02454 genome assembly, chromosome: 1	LR699001.1
					Akkermansia muciniphila strain 139 chromosome, complete genome	CP036293.1
4	Candidate 75 (Ct: 32.65)	Akk_Mi_04	1	CGCCAGTGTGATGGATATCTGCAGAATTCGCCCTTCGATAATTCCGCTATTTTTTCGCAAAGGGCCTCGTAGGACCAGCCGGCGGCAGCAGCCGCCTTGGGGAGCAGGCTGGAGGGGGTCATGCCGGGAATGGTGTTGATTTCCAGCACGAAGAAGGGCGAATTCCAGCACACTGGCGGCCGTTACTAGTGGATCCGAGCTCGGTACCAAGCTTGGCGTAATCATGGTCATAGCTGTTTCCTGTGTGAAA	Akkermansia muciniphila strain EB-AMDK-39 chromosome, complete genome	CP029753.1
					Akkermansia muciniphila strain EB-AMDK-40 chromosome, complete genome	CP029701.1
					E. coli-T. kodakarensis shuttle vector pTNTrpE, complete sequence	MG920814.1
					E. coli-T. kodakarensis shuttle vector pTNTrpE, complete sequence	MG920813.1
					E. coli-T. kodakarensis shuttle vector pTNTrpE, complete sequence	MG920813.1
			2	CGCCAGTGTGATGGATATCTGCAGAATTCGCCCTTCGATAATTCCGCTATTTTTTCGCAAAGGGCCTCGTAGGACCAGCCGGCGGCAGCAGCCGCCTTGGGGAGCAGGCTGGAGGGGGTCATGCCGGGAATGGTGTTGATTTCCAGCACGAAGAAGGGCGAATTCCAGCACACTGGCGGCCGTTACTAGTGGATCCGAGCTCGGTACCAAGCTTGGCGTAATCATGGTCATAGCTGTTTCCTGTGTGAAA	Akkermansia muciniphila strain EB-AMDK-39 chromosome, complete genome	CP029753.1
					Akkermansia muciniphila strain EB-AMDK-40 chromosome, complete genome	CP029701.1
					E. coli-T. kodakarensis shuttle vector pTNTrpE, complete sequence	MG920814.1
					E. coli-T. kodakarensis shuttle vector pTNTrpE, complete sequence	MG920813.1
					E. coli-T. kodakarensis shuttle vector pTNTrpE, complete sequence	MG920814.1
			3	CGCCAGTGTGATGGATATCTGCAGAATTCGCCCTTCTTCCGTGCTGGAAATCAACACCATTCCCGGCATGACCCCCTCCAGCCTGCTCCCCAAGGCGGCTGCTGCCGCCGGCTGGTCCTACGAGGCCCTTTGCGAAAAAATAGCGGAATTATCGAAGGGCGAATTCCAGCACACTGGCGGCCGTTACTAGTGGATCCGAGCTCGGTACCAAGCTTGGCGTAATCATGGTCATAGCTGTTTCCTGTGTGAAA	Akkermansia muciniphila strain EB-AMDK-39 chromosome, complete genome	CP029753.1
					Akkermansia muciniphila strain EB-AMDK-40 chromosome, complete genome	CP029701.1
					E. coli-T. kodakarensis shuttle vector pTNTrpE, complete sequence	MG920814.1
					E. coli-T. kodakarensis shuttle vector pTNTrpE, complete sequence	MG920813.1
					E. coli-T. kodakarensis shuttle vector pTNTrpE, complete sequence	MG920814.1
			4	CGCCAGTGTGATGGATATCTGCAGAATTCGCCCTTCTTCCGTGCTGGAAATCAACACCATTCCCGGCATGACCCCCTCCAGCCTGCTCCCCAAGGCGGCTGCTGCCGCCGGCTGGTCCTACGAGGCCCTTTGCGAAAAAATAGCGGAATTATCGAAGGGCGAATTCCAGCACACTGGCGGCCGTTACTAGTGGATCCGAGCTCGGTACCAAGCTTGGCGTAATCATGGTCATAGCTGTTTCCTGTGTGAAA	Akkermansia muciniphila strain EB-AMDK-39 chromosome, complete genome	CP029753.1
					Akkermansia muciniphila strain EB-AMDK-40 chromosome, complete genome	CP029701.1
					E. coli-T. kodakarensis shuttle vector pTNTrpE, complete sequence	MG920814.1
					E. coli-T. kodakarensis shuttle vector pTNTrpE, complete sequence	MG920813.1
					E. coli-T. kodakarensis shuttle vector pTNTrpE, complete sequence	MG920814.1
			5	CGCCAGTGTGATGGATATCTGCAGAATTCGCCCTTCGATAATTCCGCTATTTTTTCGCAAAGGGCCTCGTAGGACCAGCCGGCGGCAGCCGCCGCCTTGGGGAGCAGGCTGGAGGGGGTCATGCCGGGAATGGTGTTGATTTCCAGCACGAAGAAGGGCGAATTCCAGCACACTGGCGGCCGTTACTAGTGGATCCGAGCTCGGTACCAAGCTTGGCGTAATCATGGTCATAGCTGTTTCCTGTGTGAAA	Akkermansia muciniphila strain EB-AMDK-39 chromosome, complete genome	CP029753.1
					Akkermansia muciniphila strain EB-AMDK-40 chromosome, complete genome	CP029701.1
					E. coli-T. kodakarensis shuttle vector pTNTrpE, complete sequence	MG920814.1
					E. coli-T. kodakarensis shuttle vector pTNTrpE, complete sequence	MG920813.1
					E. coli-T. kodakarensis shuttle vector pTNTrpE, complete sequence	MG920814.1
5	Candidate 9 (Ct: 32.56)	Akk_Mi_05	1	CGCCAGTGTGATGGATATCTGCAGAATTCGCCCTTCGATAATTCCGCTATTTTTTCGCAAAGGGCCTCGTAGGACCAGCCGGCGGCAGCCGCCGCCTTGGGGAGCAGGCTGGAGGGGGTCATGCCGGGAATGGTGTTGATTTCCAGCACGAAGAAGGGCGAATTCCAGCACACTGGCGGCCGTTACTAGTGGATCCGAGCTCGGTACCAAGCTTGGCGTAATCATGGTCATAGCTGTTTCCTGTGTGAAA	Akkermansia muciniphila strain EB-AMDK-39 chromosome, complete genome	CP029753.1
					Akkermansia muciniphila strain EB-AMDK-40 chromosome, complete genome	CP029701.1
					E. coli-T. kodakarensis shuttle vector pTNTrpE, complete sequence	MG920814.1
					E. coli-T. kodakarensis shuttle vector pTNTrpE, complete sequence	MG920813.1
					E. coli-T. kodakarensis shuttle vector pTNTrpE, complete sequence	MG920814.1
			2	CGCCAGTGTGATGGATATCTGCAGAATTCGCCCTTCGATAATTCCGCTATTTTTTCGCAAAGGGCCTCGTAGGACCAGCCGGCGGCAGCCGCCGCCTTGGGGAGCAGGCTGGAGGGGGTCATGCCGGGAATGGTGTTGATTTCCAGCACGAAGAAGGGCGAATTCCAGCACACTGGCGGCCGTTACTAGTGGATCCGAGCTCGGTACCAAGCTTGGCGTAATCATGGTCATAGCTGTTTCCTGTGTGAA	Akkermansia muciniphila strain EB-AMDK-39 chromosome, complete genome	CP029753.1
					Akkermansia muciniphila strain EB-AMDK-40 chromosome, complete genome	CP029701.1
					E. coli-T. kodakarensis shuttle vector pTNTrpE, complete sequence	MG920814.1
					E. coli-T. kodakarensis shuttle vector pTNTrpE, complete sequence	MG920813.1
					E. coli-T. kodakarensis shuttle vector pTNTrpE, complete sequence	MG920814.1
			3	CGCCAGTGTGATGGATATCTGCAGAATTCGCCCTTCGATAATTCCGCTATTTTTTCGCAAAGGGCCTCGTAGGACCAGCCGGCGGCAGCCGCCGCCTTGGGGAGCAGGCTGGAGGGGGTCATGCCGGGAATGGTGTTGATTTCCAGCACGAAGAAGGGCGAATTCCAGCACACTGGCGGCCGTTACTAGTGGATCCGAGCTCGGTACCAAGCTTGGCGTAATCATGGTCATAGCTGTTTCCTGTGTGAA	Akkermansia muciniphila strain EB-AMDK-39 chromosome, complete genome	CP029753.1
					Akkermansia muciniphila strain EB-AMDK-40 chromosome, complete genome	CP029701.1
					E. coli-T. kodakarensis shuttle vector pTNTrpE, complete sequence	MG920814.1
					E. coli-T. kodakarensis shuttle vector pTNTrpE, complete sequence	MG920813.1
					E. coli-T. kodakarensis shuttle vector pTNTrpE, complete sequence	MG920814.1
			4	CGCCAGTGTGATGGATATCTGCAGAATTCGCCCTTCTTCGTGCTGGGAAATCAACACCATTCCCGGCATGACCCCCTCCAGCCTGCTCCCCAAGGCGGCGGCTGCCGCCGGCTGGTCCTACGGGGCCCTTTGCGAAAAAATAGCGGAATTATCGAAGGGCGAATTCCAGCACACTGGCGGCCGTTACTAGTGGATCCGAGCTCGGTACCAAGCTTGGCGTAATCATGGTCATAGCTGTTTCCTGTGTGAAA	Akkermansia muciniphila strain EB-AMDK-39 chromosome, complete genome	CP029753.1
					Akkermansia muciniphila strain EB-AMDK-40 chromosome, complete genome	CP029701.1
					E. coli-T. kodakarensis shuttle vector pTNTrpE, complete sequence	MG920814.1
					E. coli-T. kodakarensis shuttle vector pTNTrpE, complete sequence	MG920813.1
					E. coli-T. kodakarensis shuttle vector pTNTrpE, complete sequence	MG920814.1
			5	CGCCAGTGTGATGGATATCTGCAGAATTCGCCCTTCGATAATTCCGCTATTTTTTCGCAAAGGGCCTCGTAGGACCAGCCGGCGGCAGCCGCCGCCTTGGGGAGCAGGCTGGAGGGGGTCATGCCGGGAATGGTGTTGATTTCCAGCACGAAGAAGGGCGAATTCCAGCACACTGGCGGCCGTTACTAGTGGATCCGAGCTCGGTACCAAGCTTGGCGTAATCATGGTCATAGCTGTTTCCTGTGTGAAA	Akkermansia muciniphila strain EB-AMDK-39 chromosome, complete genome	CP029753.1
					Akkermansia muciniphila strain EB-AMDK-40 chromosome, complete genome	CP029701.1
					E. coli-T. kodakarensis shuttle vector pTNTrpE, complete sequence	MG920814.1
					E. coli-T. kodakarensis shuttle vector pTNTrpE, complete sequence	MG920813.1
					E. coli-T. kodakarensis shuttle vector pTNTrpE, complete sequence	MG920814.1

## Sheet: Bacteroides_High
Supplementary Table S7. Bacterial identification results of each genus by BLAST test
Bacteroides sp. High Top 5 BLAST Results
No.	Sample	Name	Colony no.	Input sequence	Description	Accession
1	Candidate 39 (Ct: 15.87)	Bac_Ma_01	1	CGCCAGTGTGATGGATATCTGCAGAATTCGCCCTTGGTGCCTCTCAGACAATCAGAAGTGAATCGTATACTTGGTACAGTGGACGAACTGCAGGAAACGGGTGAAGAACTCAATATTCCGTACGTGGTGGGTGAAACTGTAAAAATTACTTTTGGACCTTTCAGCGGATTCAGTGGTATCATTGAGCGGATTCAGTGTTAAGGGCGAATTCCAGCACACTGGCGGCCGTTACTAGTGGATCCGAGCTCGGTACCAAGCTTGGCGTAATCATGGTCATAGCTGTTTCCTGTGTGAAATTGTTATCCGCA	Bacteroides sp. M10 chromosome	CP060488.1
					Bacteroides ovatus strain 3725 D1 iv chromosome, complete genome	CP041395.1
					Bacteroides ovatus V975 genome assembly, chromosome: I	LT622246.1
					Bacteroides ovatus strain ATCC 8483, complete genome	CP012938.1
					Bacteroides caecimuris strain I48 chromosome, complete genome	CP015401.2
			2	CGCCAGTGTGATGGATATCTGCAGAATTCGCCCTTCAATGATACCACTGAATCCGCTGAAAGGTCCAAAAGTAACTTTTACAGTTTCACCCACCACGTACGGAATATTGAGTTCTTCACCCGTTTCCTGCAGTTCGTCCACTGTACCAAGTATACGATTCACTTCTGATTGTCTGAGAGGCACCAAGGGCGAATTCCAGCACACTGGCGGCCGTTACTAGTGGATCCGAGCTCGGTACCAAGCTTGGCGTAATCATGGTCATAGCTGTTTCCTGTGTGAAATTGTTATCCGCAA	Bacteroides sp. M10 chromosome	CP060488.1
					Bacteroides ovatus strain 3725 D1 iv chromosome, complete genome	CP041395.1
					Bacteroides ovatus V975 genome assembly, chromosome: I	LT622246.1
					Bacteroides ovatus strain ATCC 8483, complete genome	CP012938.1
					Bacteroides caecimuris strain I48 chromosome, complete genome	CP015401.2
			3	CGCCAGTGTGATGGATATCTGCAGAATTCGCCCTTGGTGCCTCTCAGACAATCAGAAGTGAATCGTATACTTGGTACAGTGGACGAACTGCAGGAAACGGGTGAAGAACTCAATATTCCGTACGTGGTGGGTGAAACTGTAAAAGTTACTTTTGGACCTTTCAGCGGATTCAGTGGTATCATTGAAGGGCGAATTCCAGCACACTGGCGGCCGTTACTAGTGGATCCGAGCTCGGTACCAAGCTTGGCGTAATCATGGTCATAGCTGTTTCCTGTGTGAAATGGTTATCCGCA	Bacteroides sp. M10 chromosome	CP060488.1
					Bacteroides ovatus strain 3725 D1 iv chromosome, complete genome	CP041395.1
					Bacteroides ovatus V975 genome assembly, chromosome: I	LT622246.1
					Bacteroides ovatus strain ATCC 8483, complete genome	CP012938.1
					Bacteroides caecimuris strain I48 chromosome, complete genome	CP015401.2
			4	CGCCAGTGTGATGGATATWCTGCAGAATTCGCCCTTGGTGCCTCTCAGACAATCAGAAGTGAATCGTATACTTGGTACAGTGGACGAACWGCAGGAAACGGGTGAAGAACTCAATATTCAGTACGTGGTGGGTGAAACTGTAAAAGTTACTTTTGGACCTTTCAGCGGATTCAGTGGTATCATTGAAGGGCGAATTCCAGCACACTGGCGGCCGTTACTAGTGGATCCGAGCTCGGTACCAAGCTTGGCGTAATCATGGTCATAGCTGTTTCCTGTGTGAAATKGTTATCCGCA	Bacteroides sp. M10 chromosome	CP060488.1
					Bacteroides ovatus strain 3725 D1 iv chromosome, complete genome	CP041395.1
					Bacteroides ovatus V975 genome assembly, chromosome: I	LT622246.1
					Bacteroides ovatus strain ATCC 8483, complete genome	CP012938.1
					Bacteroides caecimuris strain I48 chromosome, complete genome	CP015401.2
			5	CGCCAGTGTGATGGATATCTGCAGAATTCGCCCTTGGTGCCTCTCAGACAATCAGAAGTGAATCGTATACTTGGTACAGTGGACGAACTGCAGGAAACGGGTGAAGAACTCAATATTCCGTACGTGGTGGGTGAAACTGTAAAAGTTACTTTTTGACCTTTCAGCGGATTCAGTGGTATCATTGAGCGGATTCAGTGGTATCATTGAAGGGCGAATTCCAGCACACTGGCGGCCGTTACTAGTGGATCCGAGCTCGGTACCAAGCTTGGCGTAATCATGGTCATAGCTGTTTCCTGTGTGAAATTGTTATCCGCA	Bacteroides sp. M10 chromosome	CP060488.1
					Bacteroides ovatus strain 3725 D1 iv chromosome, complete genome	CP041395.1
					Bacteroides ovatus V975 genome assembly, chromosome: I	LT622246.1
					Bacteroides ovatus strain ATCC 8483, complete genome	CP012938.1
					Bacteroides caecimuris strain I48 chromosome, complete genome	CP015401.2
2	Candidate 18 (Ct: 16.66)	Bac_Ma_02	1	CGCCAGTGTGATGGATATCTGCAGAATTCGCCCTTGGTGCCTCTCAGACAATCAGAAGTGAATCGTATACTTGGAACAGTGGACGAACTGCAGGAAACGGGTGAAGAACTCAATATTCCGTATGTAGTGGTGAGACTGTGAAAGTTACTTTTGGTCCTTTCAGCGGATTCAGTGGTATCATTGAAGGGCGAATTCCAGCACACTGGCGGCCGTTACTAGTGGATCCGAGCTCGGTACCAAGCTTGGCGTAATCATGGTCATAGCTGTTTCCTGTGTGAAATTGTTATCCGCAA	Bacteroides thetaiotaomicron F9-2 DNA, nearly complete genome	AP022660.1
					Bacteroides thetaiotaomicron strain 7330, complete genome	CP012937.1
					Bacteroides thetaiotaomicron strain FDAARGOS_935 chromosome	CP065872.1
					Bacteroides thetaiotaomicron strain DSM 2079 chromosome, complete genome	CP040530.1
					Bacteroides thetaiotaomicron VPI-5482, complete genome	AE015928.1
			2	CGCCAGTGTGATGGATATCTGCAGAATTCGCCCTTGGTGCCTCTCAGACAATCAGAAGTGAATCGTATACTTGGTACAGTGGACGAACTGCAGGAACGGGTGAAGAACTCAATATTCCGTACGTAGTGGGAGAAACTGTAAAAGTTACTTTTGGACCTTTCAGCGGATTCAGTGGTATCATTGAAGGGCGAATTCCAGCACACTGGCGGCCGTTACTAGTGGATCCGAGCTCGGTACCAAGCTTGGCGTAATCATGGTCATAGCTGTTTCCTGTGTGAAATTGTTATCCGCA	Bacteroides caecimuris strain I48 chromosome, complete genome	CP015401.2
					Bacteroides xylanisolvens XB1A draft genome	FP929033.1
					Bacteroides xylanisolvens strain H207 chromosome, complete genome	CP041230.1
					Bacteroides sp. M10 chromosome	CP060488.1
					Bacteroides ovatus strain FDAARGOS_733 chromosome, complete genome	CP046397.1
			3	CGCCAGTGTGATGGATATCTGCAGAATTCGCCCTTGGTGCCTCTCAGACAATCAGAAGTGAATCGTATACTTGGTACAGTGGACGAACTGCAGGAAACGGGTGAAGAACTCAATATTCCGTACGTAGTGGGAGAAACTGTAAAAGTTACTCTTGGACTTTTCAGCGGATTCAGTGGTATCATTGAAGGGCGAATTCCAGCACACTGGCGGCCGTTACTAGTGGATCCGAGCTCGGTACCAAGCTTGGCGTAATCATGGTCATAGCTGTTTCCTGTGTGAAATTGTTATCCGCAA	Bacteroides caecimuris strain I48 chromosome, complete genome	CP015401.2
					Bacteroides xylanisolvens XB1A draft genome	FP929033.1
					Bacteroides xylanisolvens strain H207 chromosome, complete genome	CP041230.1
					Bacteroides sp. M10 chromosome	CP060488.1
					Bacteroides ovatus strain FDAARGOS_733 chromosome, complete genome	CP046397.1
			4	CGCCAGTGTGATGGATATCTGCAGAATTCGCCCTTGGGTGCCTCTCAGACAATCAGAAGTGAATCGTATACTTGGTACAGTGGACGAACTGCAGGAAACGGGTGAAGAACTCAATATTCCGTACGTAGTGGGAGAAACTGTAAAAGTTACTTTTGGACCTTTCAGCGGATTCAGTGGTATCATTGAAGGGCGAATTCCAGCACACTGGCGGCCGTTACTAGTGGATCCGAGCTCGGTACCAAGCTTGGCGTAATCATGGTCATAGCTGTTTCCTGTGTGAAATTGTTATCCGCAA	Bacteroides caecimuris strain I48 chromosome, complete genome	CP015401.2
					Bacteroides xylanisolvens XB1A draft genome	FP929033.1
					Bacteroides xylanisolvens strain H207 chromosome, complete genome	CP041230.1
					Bacteroides sp. M10 chromosome	CP060488.1
					Bacteroides ovatus strain FDAARGOS_733 chromosome, complete genome	CP046397.1
			5	CGCCAGTGTGATGGATATCTGCAGAATTCGCCCTTGGTGCCTCTCAGACAATCAGAAGTGAATCGTATACTTGGTACAGTGGACGAACTGCAGGAAGCGGGTGAAGAACTCAATATTCCGTACGTAGTGGGAGAAACTGTAAAGTTACTTTTGGACCTTTCAGCGGATTCAGTGGTATCATTGAAGGGCGAATTCCAGCACACTGGCGGCCGTTACTAGTGGATCCGAGCTCGGTACCAAGCTTGGCGTAATCATGGTCATAGCTGTTTCCTGTGTGAAATTGTTATCCGCAA	Bacteroides caecimuris strain I48 chromosome, complete genome	CP015401.2
					Bacteroides xylanisolvens XB1A draft genome	FP929033.1
					Bacteroides xylanisolvens strain H207 chromosome, complete genome	CP041230.1
					Bacteroides sp. M10 chromosome	CP060488.1
					Bacteroides ovatus strain FDAARGOS_733 chromosome, complete genome	CP046397.1
3	Candidate 78 (Ct: 16.94)	Bac_Ma_03	1	CGCCAGTGTGATGGATATCTGCAGAATTCGCCCTTGGCGACTCTGGTGGCGGCAGCGGCGTCGAGGTGCCTCTCAGACAATCAGAAGTGAATCGTATACTTGGTACAGTGGACGAATTGCAGGAAACGGGTGAAGAACTCAATATTCCGTACGTGGTTGGTGAAACTGTTAAAGTTACTTTTGGTCCTTTCAGCGGATTCAGTAGTATCATTGAAGGGCGAATTCCAGCACACTGGCGGCCGTTACTAGTGGATCCGAGCTCGGTACCAAGCTTGGCGTAATCATGGTCATAGCTGTTTCCTGTGTGAAATGGTTATCCGCA	Bacteroides sp. HF-5287 chromosome, complete genome	CP059856.1
					Bacteroides sp. M10 chromosome	CP060488.1
					Bacteroides ovatus strain 3725 D1 iv chromosome, complete genome	CP041395.1
					Bacteroides ovatus V975 genome assembly, chromosome: I	LT622246.1
					Bacteroides ovatus strain ATCC 8483, complete genome	CP012938.1
			2	CGCCAGTGTGATGGATATCTGCAGAATTCGCCCTTGGTGCCCTCTCAGACAATCAGAAGTGAATCGTATACTTGGTACAGTAGACGAACTACAGGAAACGGGTGAAGAACTCAATATTCCGTATGTAGTGGGTGAGACTGTGAAAGTTACTTTTGGTCCTTTCAGCGGATTCAGTGGTATCATTGAAGGGCGAATTCCAGCACACTGGCGGCCGTTACTAGTGGATCCGAGCTCGGTACCAAGCTTGGCGTAATCATGGTCATAGCTGTTTCCTGTGTGAAATTGTTATCCGCAA	Bacteroides thetaiotaomicron F9-2 DNA, nearly complete genome	AP022660.1
					Bacteroides thetaiotaomicron strain 7330, complete genome	CP012937.1
					Bacteroides thetaiotaomicron strain FDAARGOS_935 chromosome	CP065872.1
					Bacteroides thetaiotaomicron strain DSM 2079 chromosome, complete genome	CP040530.1
					Bacteroides thetaiotaomicron VPI-5482, complete genome	AE015928.1
			3	CGCCAGTGTGATGGATATCTGCAGAATTCGCCCTTGGTGGCCTCTCAGACAATCAGAAGTGAATCGTATACTTGGTACAGTGGACGAACTACAGGAAACGGGTGAAGAACTCAATATTCCGTATGTAGTGGGTGAGACTGTGAAAGTTACTTTTGGTCCTTTCAGCGGATTCAGTGGTATCATTGGGCGGATTCAGTGGTATCATTGAGCGGATTCAGTGGTATCATTGAAGGGCGAATTCCAGCACACTGGCGGCCGTTACTAGTGGATCCGAGCTCGGTACCAAGCTTGGCGTAATCATGGTCATAGCTGTTTCCTGTGTGAAATGTTATCCGCA	Bacteroides thetaiotaomicron F9-2 DNA, nearly complete genome	AP022660.1
					Bacteroides thetaiotaomicron strain 7330, complete genome	CP012937.1
					Bacteroides thetaiotaomicron strain FDAARGOS_935 chromosome	CP065872.1
					Bacteroides thetaiotaomicron strain DSM 2079 chromosome, complete genome	CP040530.1
					Bacteroides thetaiotaomicron VPI-5482, complete genome	AE015928.1
			4	CGCCAGTGTGATGGATATCTGCAGAATTCGCCCTTCAATGATACCACTGAATCCGCTAAAAGGACCAAAAGTAACTTTTACAGTTTCACCCACTACGTACGGAATATTGAGTTCTTCACCCGTTTCCTGCAGTTCGTCCACTGTACCAAGTATACGATTCACTTCTGATTGTCTGAGAGGCACCAAGGGCGAATTCCAGCACACTGGCGGCCGTTACTAGTGGATCCGAGCTCGGTACCAAGCTTGGCGTAATCATGGKCATAGCTGTTTCCTGTGTGAAAGTGGTATCGGCAAAAGSM	Bacteroides caccae strain ATCC 43185 chromosome, complete genome	CP022412.2
					Bacteroides ovatus strain 3725 D1 iv chromosome, complete genome	CP041395.1
					Bacteroides ovatus V975 genome assembly, chromosome: I	LT622246.1
					Bacteroides ovatus strain ATCC 8483, complete genome	CP012938.1
					Bacteroides caecimuris strain I48 chromosome, complete genome	CP015401.2
			5	CGCCAGTGTGATGGATATCTGCAGAATTCGCCCTTGGTTGCCTCTCAGACAATCAGAAGTGAATCGTATACTTGGTACAGTGGACGAACTGCAGGAAACGGGTGAAGAACTCAATATTCCCTACGTAGTGGGTGAAACTGTAAAAGTTACTTTTGGTCCTTTTAGCGGATTCAGTGGTATCATTGAAGGGCGAATTCCAGCACACTGGCGGCCGTTACTAGTGGATCCGAGCTCGGTACCAAGCTTGGCGTAATCATGGTCATAGCTGTTTCCTGTGTGAAATTGTTATCCGCAA	Bacteroides caccae strain ATCC 43185 chromosome, complete genome	CP022412.2
					Bacteroides ovatus strain 3725 D1 iv chromosome, complete genome	CP041395.1
					Bacteroides ovatus V975 genome assembly, chromosome: I	LT622246.1
					Bacteroides ovatus strain ATCC 8483, complete genome	CP012938.1
					Bacteroides caecimuris strain I48 chromosome, complete genome	CP015401.2
4	Candidate 98 (Ct: 17.02)	Bac_Ma_04	1	CGCCAGTGTGATGGATATCTGCAGAATTCGCCCTTGGTGGCCTCTCAGACAATCAGAAGTGAATCGTATACTTGGTACAGTGGACGAACTGCAGGAAACGGGTGAAGAACTCAATATTCCGTACGTAGTGGGAGAAACTGTAAAAGTTACTTTTGGACCTTTCAGCGGATTCAGTGGTATCATTGAAGGGCGAATTCCAGCACACTGGCGGCCGTTACTAGTGGATCCGAGCTCGGTACCAAGCTTGGCGTAATCATGGTCATAGCTGTTTCCTGTGTGAAATTGTTATCCGCA	Bacteroides caecimuris strain I48 chromosome, complete genome	CP015401.2
					Bacteroides xylanisolvens XB1A draft genome	FP929033.1
					Bacteroides xylanisolvens strain H207 chromosome, complete genome	CP041230.1
					Bacteroides sp. M10 chromosome	CP060488.1
					Bacteroides ovatus strain FDAARGOS_733 chromosome, complete genome	CP046397.1
			2	CGCCAGTGTGATGGATATCTGCAGAATTCGCCCTTGGTGCCTCTCAGACAATCAGAAGTGAATCGTATACTTGGTACAGTGGACGAACTGCAGGAAACGGGTGAAGAACTCAATATTCCGTACGTAGTGGGAGAAACTGTAAAAGTTACTTTTGGACCTTTCAGCGGATTCAGTGGTATCATTGAAGGGCGAATTCCAGCACACTGGCGGCCGTTACTAGTGGATCCGAGCTCGGTACCAAGCTTGGCGTAATCATGGTCATAGCTGTTTCCTGTGTGAAATTGTTATCCGCA	Bacteroides caecimuris strain I48 chromosome, complete genome	CP015401.2
					Bacteroides xylanisolvens XB1A draft genome	FP929033.1
					Bacteroides xylanisolvens strain H207 chromosome, complete genome	CP041230.1
					Bacteroides sp. M10 chromosome	CP060488.1
					Bacteroides ovatus strain FDAARGOS_733 chromosome, complete genome	CP046397.1
			3	CGCCAGTGTGATGGATATCTGCAGAATTCGCCCTTGGTGCCTCTCAGACAATCAGAAGTGAATCGTATACTTGGTACAGTAGACGAACTACAGGAAACGGGTGAAGAACTCAATATTCCGTATGTAGTGGGTGAGACTGTGAAAGTTACTTTGGTCCTTTCAGCGGATTCAGTGGTATCATTGAAGGGCGAATTCCAGCACACTGGCGGCCGTTACTAGTGGATCCGAGCTCGGTACCAAGCTTGGCGTAATCATGGTCATAGCTGTTTCCTGTGTGAAATTGTTATCCGCA	Bacteroides thetaiotaomicron F9-2 DNA, nearly complete genome	AP022660.1
					Bacteroides thetaiotaomicron strain 7330, complete genome	CP012937.1
					Bacteroides thetaiotaomicron strain FDAARGOS_935 chromosome	CP065872.1
					Bacteroides thetaiotaomicron strain DSM 2079 chromosome, complete genome	CP040530.1
					Bacteroides thetaiotaomicron VPI-5482, complete genome	AE015928.1
			4	CGCCAGTGTGATGGATATCTGCAGAATTCGCCCTTGGTGCCTCTCAGACAATCAGAAGTGAATCGTATACTTGGTACARTAGACGAACTACAGGAAACGGGTGAAGAACTCAATATTCCGTATGTAGTGGGTGAGACTGTGAAAGTTACTTTTGGTCCTTTCAGCGGATTCAGTGGTATCATTGAAGGGCGAATTCCAGCACACTGGCGGCCGTTACTAGTGGATCCGAGCTCGGTACCAAGCTTGGCGTAATCATGGTCATAGCTGTTTCCTKTGTGRAATTGTYATYCKMCMMAA	Bacteroides thetaiotaomicron F9-2 DNA, nearly complete genome	AP022660.1
					Bacteroides thetaiotaomicron strain 7330, complete genome	CP012937.1
					Bacteroides thetaiotaomicron strain FDAARGOS_935 chromosome	CP065872.1
					Bacteroides thetaiotaomicron strain DSM 2079 chromosome, complete genome	CP040530.1
					Bacteroides thetaiotaomicron VPI-5482, complete genome	AE015928.1
			5	CGCCAGTGTGATGGATATCTGCAGAATTCGCCCTTGGTGCCTCTCAGACAATCAGAAGTGAATCGTATACTTGGTACAGTGGACGAACTGCAGGAAACGGGTGAAGAACTCAATATTCCGTACGTAGTGGGAGAAACTGTAAAAGTTACTTTTGGACCTTTCAGCGGATTCAGTGGTATCATTGAAGGGCGAATTCCAGCACACTGGCGGCCGTTACTAGTGGATCCGAGCTCGGTACCAAGCTTGGCGTAATCATGGTCATAGCTGTTTCCTGTGTGAAATTGTTATCCGCAA	Bacteroides caecimuris strain I48 chromosome, complete genome	CP015401.2
					Bacteroides xylanisolvens XB1A draft genome	FP929033.1
					Bacteroides xylanisolvens strain H207 chromosome, complete genome	CP041230.1
					Bacteroides sp. M10 chromosome	CP060488.1
					Bacteroides ovatus strain FDAARGOS_733 chromosome, complete genome	CP046397.1
5	Candidate 2 (Ct: 17.39)	Bac_Ma_05	1	CGCCAGTGTGATGGATATCTGCAGAATTCGCCCTTGGTGCCCTCTCAGACAATCAGAAGTGAATCGTATACTTGGTACAGTGGACGAACTGCAGGAAACGGGTGAAGAACTCAATATTCCGTACGTGGTGGGTGAAACTGTAAAAGTTACTTTTGGACCTTTCAGCGGATTCAGTGGTATCATTGAAGGGCGAATTCCAGCACACTGGCGGCCGTTACTAGTGGATCCGAGCTCGGTACCAAGCTTGGCGTAATCATGGTCATAGCTGTTTCCTGTGTGAAATTGTTATCCGCA	Bacteroides sp. M10 chromosome	CP060488.1
					Bacteroides ovatus strain 3725 D1 iv chromosome, complete genome	CP041395.1
					Bacteroides ovatus V975 genome assembly, chromosome: I	LT622246.1
					Bacteroides ovatus strain ATCC 8483, complete genome	CP012938.1
					Bacteroides caecimuris strain I48 chromosome, complete genome	CP015401.2
			2	CGCCAGTGTGATGGATATCTGCAGAATTCGCCCTTGGTGCCTCTCAGACAATCAGAAGTGAATCGTATACTTGGTACAGTGGACGAACTGCAGGAAACGGGTGAAGAACTCAATATTCCGTACGTGGTGGGTGAAACTGTAAAAGTTACTTTTTGGACCTTTTAGCGGATTCAGTGGTATCATTGAAGGGCGAATTCCAGCACACTGGCGGCCGTTACTAGTGGATCCGAGCTCGGTACCAAGCTTGGCGTAATCATGGTCATAGCTGTTTCCTGTGTGAAATTGTTATCCGCA	Bacteroides ovatus strain 3725 D1 iv chromosome, complete genome	CP041395.1
					Bacteroides ovatus V975 genome assembly, chromosome: I	LT622246.1
					Bacteroides ovatus strain ATCC 8483, complete genome	CP012938.1
					Bacteroides sp. M10 chromosome	CP060488.1
					Bacteroides caccae strain ATCC 43185 chromosome, complete genome	CP022412.2
			3	CGCCAGTGTGATGGATATCTGCAGAATTCGCCCTTGGTTGCCTCTCAGACAATCAGAAGTGAATCGTATACTTGGTACAGTGGACGAACTGCAGGAGACGGGTGAAGAACTCAATATTCCGTACGTAGTGGGAGAAACTGTAAAAGTTACTTTTGGACCTTTCAGCGGATTCAGTGGTATCATTGAAGGGCGAATTCCAGCACACTGGCGGCCGTTACTAGTGGATCCGAGCTCGGTACCAAGCTTGGCGTAATCATGGTCATAGCTGTTTCCTGTGTGAAATTGTTATCCGCA	Bacteroides caecimuris strain I48 chromosome, complete genome	CP015401.2
					Bacteroides xylanisolvens XB1A draft genome	FP929033.1
					Bacteroides xylanisolvens strain H207 chromosome, complete genome	CP041230.1
					Bacteroides sp. M10 chromosome	CP060488.1
					Bacteroides ovatus strain FDAARGOS_733 chromosome, complete genome	CP046397.1
			4	CGCCAGTGTGATGGATATCTGCAGAATTCGCCCTTGGTTGCCTCTCAGACAATCAGAAGTGAATCGTATACTTGGTACAGTAGACGAACTACTGGAAACGGGTGAAGAACTCAATATTCCGTATGTAGTGGGTGAGACTGTGAAAGTTACTTTTGGTCCTTTCAGCGGATTCAGTGGTATCATTGAAGGGCGAATTCCAGCACACTGGCGGCCGTTACTAGTGGATCCGAGCTCGGTACCAAGCTTGGCGTAATCATGGTCATAGCTGTTTCCTGTGTGAAATTGTTATCCGCAA	Bacteroides thetaiotaomicron F9-2 DNA, nearly complete genome	AP022660.1
					Bacteroides thetaiotaomicron strain 7330, complete genome	CP012937.1
					Bacteroides thetaiotaomicron strain FDAARGOS_935 chromosome	CP065872.1
					Bacteroides thetaiotaomicron strain DSM 2079 chromosome, complete genome	CP040530.1
					Bacteroides thetaiotaomicron VPI-5482, complete genome	AE015928.1
			5	CGCCAGTGTGATGGATATCTGCAGAATTCGCCCTTGGTGCCTCTCAGACAATCAGAAGTGAATCGTATACTTGGTACAGTGGACGAACTGCAGGAAACGGGTGAAGAACTCAATATTCCGTACGTGGTGGGTGAAACTGTAAAGTTACTTTTGGACCTTTTAGCGGATTCAGTGGTATCATTGAAGGGCGAATTCCAGCACACTGGCGGCCGTTACTAGTGGATCCGAGCTCGGTACCAAGCTTGGCGTAATCATGGTCATAGCTGTTTCCTGTGTGAAATTGTTATCCGCAA	Bacteroides ovatus strain 3725 D1 iv chromosome, complete genome	CP041395.1
					Bacteroides ovatus V975 genome assembly, chromosome: I	LT622246.1
					Bacteroides ovatus strain ATCC 8483, complete genome	CP012938.1
					Bacteroides sp. M10 chromosome	CP060488.1
					Bacteroides caccae strain ATCC 43185 chromosome, complete genome	CP022412.2

## Sheet: Bacteroides_Low
Supplementary Table S7. Bacterial identification results of each genus by BLAST test
Bacteroides sp. Low Top 5 BLAST Results
No.	Sample	Name	Colony no.	Input sequence	Description	Accession
1	Candidate 95 (Ct: 24.54)	Bac_Mi_01	1	CGCCAGTGTGATGGATATCTGCAGAATTCGCCCTTGGTGCCTCTCAGACAATCAGAAGTGAATCGTATACTTGGCACAGTGGACGAACTGCAGGAAACGGGTGAAGAACTCAATATTCCGTACGTAGTGGGAGAAACTGTAAAAGTTACTTTTGGACTTTCAGCGGATTCAGTGGTATCATTGAAGGGCGAATTCCAGCACACTGGCGGCCGTTACTAGTGGATCCGAGCTCGGTACCAAGCTTGGCGTAATCATGGTCATAGCTGTTTCCTGTGKGARRTTGTTATCCGCAA	Bacteroides caecimuris strain I48 chromosome, complete genome	CP015401.2
					Bacteroides xylanisolvens XB1A draft genome	FP929033.1
					Bacteroides xylanisolvens strain H207 chromosome, complete genome	CP041230.1
					Bacteroides sp. M10 chromosome	CP060488.1
					Bacteroides ovatus strain FDAARGOS_733 chromosome, complete genome	CP046397.1
			2	CGCCAGTGTGATGGATATCTGCAGAATTCGCCCTTGGTGCCTCTCAGACAATCAGAAGTGAATCGTATACTTGGTACAGTGGACGAACTGCAGGAAACGGGTGAAGAACTCAATATTCCGTACGTAGTGGGAGAAACTGTAAAAGTTACTTTTGGACCTTTCAGCGGATTCAGTGGTATCATGAAGGGCGAATTCCAGCACACTGGCGGCCGTTACTAGTGGATCCGAGCTCGGTACCAAGCTTGGCGTAATCATGGTCATAGCTGTTTCCTGTGTGAAATTGTTATCCGCAA	Bacteroides caecimuris strain I48 chromosome, complete genome	CP015401.2
					Bacteroides xylanisolvens XB1A draft genome	FP929033.1
					Bacteroides xylanisolvens strain H207 chromosome, complete genome	CP041230.1
					Bacteroides sp. M10 chromosome	CP060488.1
					Bacteroides ovatus strain FDAARGOS_733 chromosome, complete genome	CP046397.1
			3	CGCCAGTGTGATGGATATCTGCAGAATTCGCCCTTGGTGCCTCTCAGACAATCAGAAGTGAATCGTATACTTGGTACAGTGGACGAACTGCAGGAAACGGGTGAAGAACTCAATATTCCGTACGTAGTGGGAGAAACTGTAAAAGTTATTTTTGGACCTTTCAGCGGATTCAGTGGTATCATTGAAGGGCGAATTCCAGCACACTGGCGGCCGTTACTAGTGGATCCGAGCTCGGTACCAAGCTTGGCGTAATCATGGTCATAGCTGTTTCCTGTGTGAAATTGTTATCCGCA	Bacteroides caecimuris strain I48 chromosome, complete genome	CP015401.2
					Bacteroides xylanisolvens XB1A draft genome	FP929033.1
					Bacteroides xylanisolvens strain H207 chromosome, complete genome	CP041230.1
					Bacteroides sp. M10 chromosome	CP060488.1
					Bacteroides ovatus strain FDAARGOS_733 chromosome, complete genome	CP046397.1
			4	CGCCAGTGTGATGGATATCTGCAGAATTCGCCCTTGGTGCCTCTCAGACAATCAGAAGTGAATCGTATACTTGGTACAGTGGACGAACTGCAGGAAACGGGTGAAGAACTCAATATTCCGTACGTAGTGGGAGAAACTGTAAAAGTTACTTTTGGACCTTTCAGCGGATTCAGTGGTATCATTGAAGGGCGAATTCCAGCACACTGGCGGCCGTTACTAGTGGATCCGAGCTCGGTACCAAGCTTGGCGTAATCATGGTCATAGCTGTTTCCTGTGTGAAATTGTTATCCGCAA	Bacteroides caecimuris strain I48 chromosome, complete genome	CP015401.2
					Bacteroides xylanisolvens XB1A draft genome	FP929033.1
					Bacteroides xylanisolvens strain H207 chromosome, complete genome	CP041230.1
					Bacteroides sp. M10 chromosome	CP060488.1
					Bacteroides ovatus strain FDAARGOS_733 chromosome, complete genome	CP046397.1
			5	CGCCAGTGTGATGGATATCTGCAGAATTCGCCCTTGGTGCCTCTCAGACAATCAGAAGTGAATCGTATACTTGGTACAGTAGACGAACTACAGGAAACGGGTGAAGAACTCAGTATTCCGTATGTAGTGGGTGAGACTGTGAAAGTTACTTCTGGTCCTTTCAGCGGATTCAGTGGTATCATTGAGCGGATTCAGTGGTATCATTGAAGGGCGAATTCCAGCACACTGGCGGCCGTTACTAGTGGATCCGAGCTCGGTACCAAGCTTGGCGTAATCATGGTCATAGCTGTTTCCTGTGTGAAATTGGTTATCCGCAA	Bacteroides thetaiotaomicron F9-2 DNA, nearly complete genome	AP022660.1
					Bacteroides thetaiotaomicron strain 7330, complete genome	CP012937.1
					Bacteroides thetaiotaomicron strain FDAARGOS_935 chromosome	CP065872.1
					Bacteroides thetaiotaomicron strain DSM 2079 chromosome, complete genome	CP040530.1
					Bacteroides thetaiotaomicron VPI-5482, complete genome	AE015928.1
2	Candidate 82 (Ct: 24.04)	Bac_Mi_02	1	CGCCAGTGTGATGGATATCTGCAGAATTCGCCCTTGGGTGCCTCTCAGACAATCAGAAATGAATCGTATACTTGGTACAGTGGACGAACTGCAGGAAACGGGTGAAGAACTCAGTATTCCGTACGTGGTGGGTGAAACTGTAAAAGTTACTTTTGGACCTTTTAGCGGATTCAGTGGTATCATTGAAGGGCGAATTCCAGCACACTGGCGGCCGTTACTAGTGGATCCGAGCTCGGTACCAAGCTTGGCGTAATCATGGTCATAGCTGTTTCCTGTGTGAAATTGTTATCCGCAA	Bacteroides ovatus strain 3725 D1 iv chromosome, complete genome	CP041395.1
					Bacteroides ovatus V975 genome assembly, chromosome: I	LT622246.1
					Bacteroides ovatus strain ATCC 8483, complete genome	CP012938.1
					Bacteroides sp. M10 chromosome	CP060488.1
					Bacteroides caccae strain ATCC 43185 chromosome, complete genome	CP022412.2
			2	CGCCAGTGTGATGGATATCTGCAGAATTCGCCCTTGGTGCCTCTCAGACAATCAGAAGTGAATCGTATACTTGGTACAGTGGACGAACTGCAGGAAACGGGTGAAGAACTCAATATTCCGTACGTGGTGGGTGAAACTGTAAAAGTTACTTTTGGACCTTTTAGCGGATTCAGTGGTATCATTGAAGGGCGAATTCCAGCACACTGGCGGCCGTTACTAGTGGATCCGAGCTCGGTACCAAGCTTGGCGTAATCATGGTCATAGCTGTTTCCTGTGTGAAATTGTTATCCGCAA	Bacteroides ovatus strain 3725 D1 iv chromosome, complete genome	CP041395.1
					Bacteroides ovatus V975 genome assembly, chromosome: I	LT622246.1
					Bacteroides ovatus strain ATCC 8483, complete genome	CP012938.1
					Bacteroides sp. M10 chromosome	CP060488.1
					Bacteroides caccae strain ATCC 43185 chromosome, complete genome	CP022412.2
			3	CGCCAGTGTGATGGATATCTGCAGAATTCGCCCTTCAATGATACCACTGAATCCGCTGAAAGGACCAAAAGTAACTTTCACAGTCTCACCCACTACATACGGAATATTGAGTTCTTCACCCGTTTCCTGTAGTTCGTCCACTGTACCAAGTATACGATTCACTTCTGATTGTCTGAGAGGCACCAAGGGCGAATTCCAGCACACTGGCGGCCGTTACTAGTGGATCCGAGCTCGGTACCAAGCTTGGCGTAATCATGGTCATAGCTGTTTCCTGTGTGAAATGTTATCCGCA	Bacteroides thetaiotaomicron F9-2 DNA, nearly complete genome	AP022660.1
					Bacteroides thetaiotaomicron strain 7330, complete genome	CP012937.1
					Bacteroides thetaiotaomicron strain FDAARGOS_935 chromosome	CP065872.1
					Bacteroides thetaiotaomicron strain DSM 2079 chromosome, complete genome	CP040530.1
					Bacteroides thetaiotaomicron VPI-5482, complete genome	AE015928.1
			4	CGCCAGTGTGATGGATATCTGCAGAATTCGCCCTTGGTGCCTCTCAGACAATCAGAAGTGAATCGTATACTTGGTACAGTGGACGAACTGCAGGAAACGGGTGAAGAACTCAATATTCCGTACGTGGTGGGTGAAACTGTAAGAATTACTTTTGGACCTTTTAGCGGATTCAGTGGTATCATTGAAGGGCGAATTCCAGCACACTGGCGGCCGTTACTAGTGGATCCGAGCTCGGTACCAAGCTTGGCGTAATCATGGTCATAGCTGTTTCCTGTGTGAAATTGTTATCCGCAA	Bacteroides ovatus strain 3725 D1 iv chromosome, complete genome	CP041395.1
					Bacteroides ovatus V975 genome assembly, chromosome: I	LT622246.1
					Bacteroides ovatus strain ATCC 8483, complete genome	CP012938.1
					Bacteroides sp. M10 chromosome	CP060488.1
					Bacteroides caccae strain ATCC 43185 chromosome, complete genome	CP022412.2
			5	CGCCAGTGTGATGGATATCTGCAGAATTCGCCCTTCAATGATACCACTGAATCCGCTAAAAGGTCCAAAAGTAACTTTTACAGTTTCACCCACCACGTACGGAATATTGAGTTCTTCACCCGTTTCCTGCAGTTCGTCCACTGTACCAAGTATACGATTCACTTCTGATTGTCTGAGAGGCACCAAGGGCGAATTCCAGCACACTGGCGGCCGTTACTAGTGGATCCGAGCTCGGTACCAAGCTTGGCGTAATCATGGTCATAGCTGTTTCCTGTGTGAAATTGTTATCCGCA	Bacteroides ovatus strain 3725 D1 iv chromosome, complete genome	CP041395.1
					Bacteroides ovatus V975 genome assembly, chromosome: I	LT622246.1
					Bacteroides ovatus strain ATCC 8483, complete genome	CP012938.1
					Bacteroides sp. M10 chromosome	CP060488.1
					Bacteroides caccae strain ATCC 43185 chromosome, complete genome	CP022412.2
3	Candidate 99 (Ct: 23.92)	Bac_Mi_03	1	CGCCAGTGTGATGGATATCTGCAGAATTCGCCCTTGGTGCCTCTCAGACAATCAGAAGTGAATCGTATACTTGGTACAGTGGACGAACTGCAGGAAACGGGTGAAGAACTCAATATTCCGTACGTAGTGGGAGAAACTGTAAAAGTTACTTTTGGACCTTTCAGCGGATTCAGTGGTATCATTGAAGGGCGAATTCCAGCACACTGGCGGCCGTTACTAGTGGATCCGAGCTCGGTACCAAGCTTGGCGTAATCATGGTCATAGCTGTTTCCTGTGTGAAATTGTTATCCGCAA	Bacteroides caccae strain ATCC 43185 chromosome, complete genome	CP022412.2
					Bacteroides ovatus strain 3725 D1 iv chromosome, complete genome	CP041395.1
					Bacteroides ovatus V975 genome assembly, chromosome: I	LT622246.1
					Bacteroides ovatus strain ATCC 8483, complete genome	CP012938.1
					Bacteroides caecimuris strain I48 chromosome, complete genome	CP015401.2
			2	CGCCAGTGTGATGGATATCTGCAGAATTCGCCCTTCAATGATACCACTGAATCCGCTAAAAGGACCAAAAGTAACTTTTACAGATTCACCCACTACGTACGGAATATTGAGTTCTTCACCCGTTTCCTGCAGTTCGTCCACTGTACCAAGTATACGATTCACTTCTGATTGTCTGAGAGGCACCAAGGGCGAATTCCAGCACACTGGCGGCCGTTACTAGTGGATCCGAGCTCGGTACCAAGCTTGGCGTAATCATGGTCATAGCTGTTTCCTGTGTGAAATTGTTATCCGCAA	Bacteroides caecimuris strain I48 chromosome, complete genome	CP015401.2
					Bacteroides xylanisolvens XB1A draft genome	FP929033.1
					Bacteroides xylanisolvens strain H207 chromosome, complete genome	CP041230.1
					Bacteroides sp. M10 chromosome	CP060488.1
					Bacteroides ovatus strain FDAARGOS_733 chromosome, complete genome	CP046397.1
			3	CGCCAGTGTGATGGATATCTGCAGAATTCGCCCTTCAATGATACCACTGAATCCGCTAAAAGGTCCAAAAGTAACTTTTACAGTTTCACCCACCACGTACGGAATATTGAGTTCTTCACCCGTTTCCTGCAGTTCGTCCACTGTACCAAGTATACGATTCACTTCTGATTGTCTGAGAGGCACCAAGGGCGAATTCCAGCACACTGGCGGCCGTTACTAGTGGATCCGAGCTCGGTACCAAGCTTGGCGTAATCATGGTCATAGCTGTTTCCTGTGTGAAATTGTTATCCGCAA	Bacteroides ovatus strain 3725 D1 iv chromosome, complete genome	CP041395.1
					Bacteroides ovatus V975 genome assembly, chromosome: I	LT622246.1
					Bacteroides ovatus strain ATCC 8483, complete genome	CP012938.1
					Bacteroides sp. M10 chromosome	CP060488.1
					Bacteroides caccae strain ATCC 43185 chromosome, complete genome	CP022412.2
			4	CGCCAGTGTGATGGATATCTGCAGAATTCGCCCTTGGTGGCCTCTCAGACAATCAGAAGTGAATCGTATACTTGGTACAGTGGACGAACTGCAGGAAACGGGTGAAGAACTCAATATTCCGTACGTAGTGGGAGAAACTGTAAAAGTTACTTTTGGACCTTTCAGCGGATTCAGTGGTATCATTGAAGGGCGAATTCCAGCACACTGGCGGCCGTTACTAGTGGATCCGAGCTCGGTACCAAGCTTGGCGTAATCATGGTCATAGCTGTTTCCTGTGTGAAATTGTTATCCGCAA	Bacteroides caecimuris strain I48 chromosome, complete genome	CP015401.2
					Bacteroides xylanisolvens XB1A draft genome	FP929033.1
					Bacteroides xylanisolvens strain H207 chromosome, complete genome	CP041230.1
					Bacteroides sp. M10 chromosome	CP060488.1
					Bacteroides ovatus strain FDAARGOS_733 chromosome, complete genome	CP046397.1
			5	CGCCAGTGTGATGGATATCTGCAGAATTCGCCCTTGGTGCCTCTCAGACAATCAGAAGTGAATCGTATACTTGGTACAGTGGACGAACTGCAGGAAACGGGTGAAGAACTCAATATTCCGTACGTAGTGGGAGAAACTGTAAAAGTTACTTCTGGACCTTTCAGCGGATTCAGTGGTATCATTGAAGGGCGAATTCCAGCACACTGGCGGCCGTTACTAGTGGATCCGAGCTCGGTACCAAGCTTGGCGTAATCATGGTCATAGCTGTTTCCTGTGTGAAATTGTTATCCGCA	Bacteroides caecimuris strain I48 chromosome, complete genome	CP015401.2
					Bacteroides xylanisolvens XB1A draft genome	FP929033.1
					Bacteroides xylanisolvens strain H207 chromosome, complete genome	CP041230.1
					Bacteroides sp. M10 chromosome	CP060488.1
					Bacteroides ovatus strain FDAARGOS_733 chromosome, complete genome	CP046397.1
4	Candidate 64 (Ct: 23.79)	Bac_Mi_04	1	CCGCCAGTGTGATGGATATCTGCAGAATTCGCCCTTGGTGCCTCTCAGACAATCAGAAGTGAATCGTATACTTGGTACAGTGGACGAACTGCAGGAAACGGGTGAAGAACTCAATATTCCGTACGTAGTGGATCCGAGCTCGGTACCAAGCTTGGCGTAATCATGGTCATAGCTGTTTCCTGTGTGA	Bacteroides xylanisolvens strain H207 chromosome, complete genome	CP041230.1
					Bacteroides caecimuris strain I48 chromosome, complete genome	CP015401.2
					Bacteroides xylanisolvens strain CL11T00C03 chromosome, complete genome	CP072216.1
					Bacteroides xylanisolvens strain CL11T00C41 chromosome, complete genome	CP072212.1
					Bacteroides xylanisolvens strain funn3 chromosome, complete genome	CP042282.1
			2	TCGCCCTTGGTGCCTCTCAGACAATCAGAAGTGAATCGTATACTTGGTACAGTGGACGAACTGCAGGAAACGGGTGAAGAACTCAATATTCCGTACGTAGTGGATCCGAGCTCGGTACCAAGCTTGGCGTAATCATGGTCATAGCTGTTTC	Bacteroides xylanisolvens strain H207 chromosome, complete genome	CP041230.1
					Bacteroides caecimuris strain I48 chromosome, complete genome	CP015401.2
					Bacteroides xylanisolvens strain CL11T00C03 chromosome, complete genome	CP072216.1
					Bacteroides xylanisolvens strain CL11T00C41 chromosome, complete genome	CP072212.1
					Bacteroides xylanisolvens strain APCS1/XY chromosome, complete genome	CP042282.1
			3	GGCCGCCAGTGTGATGGATATCTGCAGAATTCGCCCTTGGTGCCTCTCAGACAATCAGAAGTGAATCGTATACTTGGTACAGTGGACGAACTGCAGGAAACGGGTGAAGAACTCAATATTCCGTACGTGGTGGGTGAAACTGTAAAAGTTACTTTTGGACCTTTCAGCGGATTCAGTGGTATCATTGAAGGGCGAATTCCAGCACACTGGCGGCCGTTACTAGTGGATCCGAGCTCGGTACCAAGCTTGGCGTAATCATGGTCATAGCTGTTTCCTGTGTGA	Bacteroides sp. M10 chromosome	CP060488.1
					Bacteroides ovatus strain 3725 D1 iv chromosome, complete genome	CP041395.1
					Bacteroides ovatus V975 genome assembly, chromosome: I	LT622246.1
					Bacteroides ovatus strain ATCC 8483, complete genome	CP012938.1
					Bacteroides ovatus strain CL06T03C20 chromosome, complete genome	CP072244.1
			4	CGCCAGTGTGATGGATATWCTGCAGAATTCGCCCTTGGTGCCTCTCAGACAATCAGAAGTGAATCGTATACTTGGTACAGTGGACGAACWGCAGGAAACGGGTGAAGAACTCAATATTCAGTACGTGGTGGGTGAAACTGTAAAAGTTACTTTTGGACCTTTCAGCGGATTCAGTGGTATCATTGAAGGGCGAATTCCAGCACACTGGCGGCCGTTACTAGTGGATCCGAGCTCGGTACCAAGCTTGGCGTAATCATGGTCATAGCTGTTTCCTGTGTGAA	Bacteroides sp. M10 chromosome	CP060488.1
					Bacteroides ovatus strain 3725 D1 iv chromosome, complete genome	CP041395.1
					Bacteroides ovatus V975 genome assembly, chromosome: I	LT622246.1
					Bacteroides ovatus strain ATCC 8483, complete genome	CP012938.1
					Bacteroides ovatus strain CL06T03C20 chromosome, complete genome	CP072244.1
			5	GAGCGGCCGCCAGTGTGATGGATATCTGCAGAATTCGCCCTTGGTGCCTCTCAGACAATCAGAAGTGAATCGTATACTTGGTACAGTGGACGAACTGCAGGAAACGGGTGAAGAACTCAATATTCCGTACGTGGTGGGTGAAACTGTAAAAGTTACTTTTTGACCTTTCAGCGGATTCAGTGGTATCATTGAGCGGATTCAGTGGTATCATTGAAGGGCGAATTCCAGCACACTGGCGGCCGTTACTAGTGGATCCGAGCTCGGTACCAAGCTTGGCGTAATCATGGTCATAGCTGTTTCCTGTGTGAAATTG	Bacteroides sp. M10 chromosome	CP060488.1
					Bacteroides ovatus strain 3725 D1 iv chromosome, complete genome	CP041395.1
					Bacteroides ovatus V975 genome assembly, chromosome: I	LT622246.1
					Bacteroides ovatus strain ATCC 8483, complete genome	CP012938.1
					Bacteroides ovatus strain CL06T03C20 chromosome, complete genome	CP072244.1
5	Candidate 75 (Ct: 23.67)	Bac_Mi_05	1	CGCCAGTGTGATGGAAYCTGCAGAATTCGCCCTTGGGTGCCTCTCAGACAATCAGAAGTGAATCGTATACTTGGTACAGTGGGCGAACYGCAGGAAACGGGTGAAGAACTCAATATTCCGTACGTAGTGGGTGAAACTGTAAAAGTTACTTTTGGTCCTTTTAGCGGATTCAGTGGTATCATTGAAGGGCGAATTCCAGCACACTGGCGGCCGTTACTAGTGGATCCGAGCTCGGTACCAAGCTTGGCGTAATCATGGTCATAGCTGTTTCCTGTGTGAAATKGTTATCCGCA	Bacteroides caccae strain ATCC 43185 chromosome, complete genome	CP022412.2
					Bacteroides ovatus strain 3725 D1 iv chromosome, complete genome	CP041395.1
					Bacteroides ovatus V975 genome assembly, chromosome: I	LT622246.1
					Bacteroides ovatus strain ATCC 8483, complete genome	CP012938.1
					Bacteroides caecimuris strain I48 chromosome, complete genome	CP015401.2
			2	CGCCAGTGTGATGGATATCTGCAGAATTCGCCCTTGGTGCCTCTCAGACAATCAGAAGTGAATCATATACTTGGTACAGTGGACGAACTGCAGGAAACGGGTGAAGAACTCAATATTCCGTACGTGGTGGGTGAAACTGTAAAAGTTACTTTTGGACCTTTTAGCGGATTCAGTGGTATCATTGAAGGGCGAATTCCAGCACACTGGCGGCCGTTACTAGTGGATCCGAGCTCGGTACCAAGCTTGGCGTAATCATGGTCATAGCTGTTTCCTGTGTGAAATTGTTATCCGCA	Bacteroides ovatus strain 3725 D1 iv chromosome, complete genome	CP041395.1
					Bacteroides ovatus V975 genome assembly, chromosome: I	LT622246.1
					Bacteroides ovatus strain ATCC 8483, complete genome	CP012938.1
					Bacteroides sp. M10 chromosome	CP060488.1
					Bacteroides caccae strain ATCC 43185 chromosome, complete genome	CP022412.2
			3	CGCCAGTGTGATGGATATCTGCAGAATTCGCCCTTGGTGCCTCTCAGACAATCAGAAGTGAATCGTATACTTGGTACAGTGGACGAACTGCAGGAACGGGTGAAGAACTCAGTATTCCGTACGTAGCGGGAGAAACTGTAAAAGTCACTTTTGGACCTTTCAGCGGATTCAGTGGTATCATTGAAGGGCGAATTCCAGCACACTGGCGGCCGTTACTAGTGGATCCGAGCTCGGTACCAAGCTTGGCGTAATCATGGTCATAGCTGTTTCCTGTGTGAAATTGATTATCCGCA	Bacteroides caecimuris strain I48 chromosome, complete genome	CP015401.2
					Bacteroides xylanisolvens XB1A draft genome	FP929033.1
					Bacteroides xylanisolvens strain H207 chromosome, complete genome	CP041230.1
					Bacteroides sp. M10 chromosome	CP060488.1
					Bacteroides ovatus strain FDAARGOS_733 chromosome, complete genome	CP046397.1
			4	CGCCAGTGTGATGGATATCTGCAGAATTCGCCCTTGGTGCCTCTCAGACAATCAGAAGTGAATCATATACTTGGTACAGTGGACGAACTGCAGGAAACGGGTGAAGAACTCAATATTCCGTACGCAGTGGGTGAAACTGTAAAAGTTACTTTTGGTCCTTTTAGCGGATTCAGTGGTATCATTGAAGGGCGAATTCCAGCACACTGGCGGCCGTTACTAGTGGATCCGAGCTCGGTACCAAGCTTGGCGTAATCATGGTCATAGCTGTTTCCTGTGTGARATTGTTATCCGCAAAA	Bacteroides caccae strain ATCC 43185 chromosome, complete genome	CP022412.2
					Bacteroides ovatus strain 3725 D1 iv chromosome, complete genome	CP041395.1
					Bacteroides ovatus V975 genome assembly, chromosome: I	LT622246.1
					Bacteroides ovatus strain ATCC 8483, complete genome	CP012938.1
					Bacteroides caecimuris strain I48 chromosome, complete genome	CP015401.2
			5	GCGGCCGCCAGTGTGATGGATATCTGCAGAATTCGCCCTTGGTGCCTCTCAGACAATCAGTGTATCATTGAGCGGATTCAGTGGTATCATTGAAGGGCGAATTCCAGCACACTGGCGGCCGTTACTAGTGGATCCGAGCTCGGTACCAAGCTTGGCGTAATCATGGTCATAGCTGTTTCCTGTGT	Cloning vector pVMG0303_Cq-U6-6_2xBbsI_gRNA-Loop, complete sequence	MW925708.1
					Cloning vector pVMG0149_Cq-U6-6_2xBbsI-gRNA, complete sequence	MW925703.1
					Cloning vector pVMG0173_Cq-Actin5c-Cas9, complete sequence	MW925696.1
					Corynebacterium pseudotuberculosis strain SigM chromosome, complete genome	CP046955.1
					Cloning vector pVMG0252_Cq-vasa-Cas9_cdHAs_O, complete sequence	MW925705.1

## Sheet: Bifidobacterium_High
Supplementary Table S7. Bacterial identification results of each genus by BLAST test
Bifidobacterium sp. High Top 5 BLAST Results
No.	Sample	Name	Colony no.	Input sequence	Description	Accession
1	Candidate 13 (Ct: 17.91)	Bif_Ma_01	1	AGTGTGATGGATATCTGCAGAATTCSCCCTTGGAGCGAAGAAGGAAGCGACGGAACCGATGTGCTTCAGGTCATGGCCGTTGGCGTCAGCCTGAGCGATGCCTTCGATGAAGGCATCGATGACCTGCTCGTAACGCTCGAGCGAGAAGATCAGGGTGACGTTGACGGAGATGCCCTTAAGGGCGAATTCCAGCACACTGGCGGCCGTTACTAGTGGATCCGAGCTCGGTACCAAGCTTGGCGTAATCATGGTCATAGCTGTTTCCTGTGTGA	Bifidobacterium pseudocatenulatum strain 12 chromosome, complete genome	CP025199.1
					Bifidobacterium pseudocatenulatum DSM 20438 = JCM 1200 = LMG 10505 DNA, complete genome	AP012330.1
					Bifidobacterium kashiwanohense PV20-2, complete genome	CP007456.1
					Bifidobacterium catenulatum subsp. kashiwanohense strain APCKJ1 chromosome, complete genome	CP026729.1
					Bifidobacterium breve strain IDCC4401 chromosome	CP045532.1
			2	CGAGCGGCCGCCAGTGTGATGGATATCTGCAGAATTCGCCCTTGGAGAACGAAGAAGGAAGCGACGGAACCGATGTGCTTCAGGTCATGGCCGTTGGCGTCAGCCTGAGCGATGCCTTCGATGAAGGCATCGATGACCTGCTCGTAACGCTCGAGCGAGAAGATCAGGGTGACGTTGACGGAGATGCCCTTAAGGGCGAATTCCAGCACACTGGCGGCCGTTACTAGTGGATCCGAGCTCGGTACCAAGCTTGGCGTAATCATGGTCATAGCTGTTTCCTGTGTGA	Bifidobacterium pseudocatenulatum strain 12 chromosome, complete genome	CP025199.1
					Bifidobacterium pseudocatenulatum DSM 20438 = JCM 1200 = LMG 10505 DNA, complete genome	AP012330.1
					Bifidobacterium kashiwanohense PV20-2, complete genome	CP007456.1
					Bifidobacterium catenulatum subsp. kashiwanohense strain APCKJ1 chromosome, complete genome	CP026729.1
					Bifidobacterium breve strain IDCC4401 chromosome	CP045532.1
			3	GAGCGGCCGCCAGTGTGCTGGAATTCGCCCTTGGAGACGAAGAAGGAAGCGACGGAGCCGATGTGCTTCAGGTCGTGGCCGTTGGCGTCAGCCTGGGCGATGCCCTCGATGAAGGCGTCGATGACCTGCTCGTAGCGCTCGAGCGAGAAGATCAGGGTGACGTTGACGGAGATGCCCTTAAGGGCGAATTCTGCAGATATCCATCACACTGGCGGCCGTTACTAGTGGATCCGAGCTCGGTACCAAGCTTGGCGTAATCATGGTCATAGCTGTTTCCTGTGTGA	Bifidobacterium longum Jih1 DNA, complete genome	AP022868.1
					Bifidobacterium longum strain Su859 genome assembly, chromosome: I	LT629712.1
					Bifidobacterium longum subsp. longum GT15, complete genome	CP006741.1
					Bifidobacterium breve strain IDCC4401 chromosome	CP045532.1
					Bifidobacterium breve isolate B.breve_1_mod genome assembly, chromosome: BILOC7D69C13_1	LR655209.1
			4	GCGGCCGCCAGTGTGATGGATATCTGCAGAATTCGCCCTTGGAGACGAAAAGGAAGCGACGGAGCCGATGTGCTTCAGGTCGTGGCCGTTGGCGTCAGCCTGGGCGATGCCCTCGATGAAGGCGTCGATGACCTGCTCGTAGCGCTCGAGCGAGAAGATCAGGGTGACGTTGACGGAGATGCCCTTAAGGGCGAATTCCAGCACACTGGCGGCCGTTACTAGTGGATCCGAGCTCGGTACCAAGCTTGGCGTAATCATGGTCATAGCTGTTTCCTGTGTGA	Bifidobacterium longum Jih1 DNA, complete genome	AP022868.1
					Bifidobacterium longum strain Su859 genome assembly, chromosome: I	LT629712.1
					Bifidobacterium longum subsp. longum GT15, complete genome	CP006741.1
					Bifidobacterium breve strain IDCC4401 chromosome	CP045532.1
					Bifidobacterium breve isolate B.breve_1_mod genome assembly, chromosome: BILOC7D69C13_1	LR655209.1
			5	GCGGCCGCCAGTGTGATGGATATCTGCAGAATTCGCCCTTGGAGGGCGAAGAAGGAAGCGACGGAACCGATGTGCTTCAGGTCATGGCCGTTGGCGTCAGCCTGAGCGATGCCTTCGATGAAGGCATCGATGACCTGCTCGTAACGCTCGAGCGAGAAGATCAGGGTGACGTTGACGGAGATGCCCTTAAGGGCGAATTCCAGCACACTGGCGGCCGTTACTAGTGGATCCGAGCTCGGTACCAAGCTTGGCGTAATCATGGTCATAGCTGTTTCCTGTGTGA	Bifidobacterium pseudocatenulatum strain 12 chromosome, complete genome	CP025199.1
					Bifidobacterium pseudocatenulatum DSM 20438 = JCM 1200 = LMG 10505 DNA, complete genome	AP012330.1
					Bifidobacterium kashiwanohense PV20-2, complete genome	CP007456.1
					Bifidobacterium catenulatum subsp. kashiwanohense strain APCKJ1 chromosome, complete genome	CP026729.1
					Bifidobacterium breve strain IDCC4401 chromosome	CP045532.1
2	Candidate 56 (Ct: 18.84)	Bif_Ma_02	1	CGCCAGTGTGATGGATMTCTGCAGAATTCGCCCTTGGAAGACGAAGAAGGAAGCGACGGAGCCGATGTGCTTCAGGTCGTGGCTMGTTGGCGGCAGCCYGAGCGATGCCCTCGATGTAAGCGTCGATGACCTGCTCGTAGCGCTCGAGCGAGAAGATCAGGGTGACGTTGACGGAGATGCCCTTAAGGGCGAATTCCAGCACACTGGCGGCCGTTACTAGTGGATCCGAGCTCGGTACCAAGCTTGGCGTAATCATGGTCATAGCTGTTTCCTGTGTGAA	Bifidobacterium longum strain 51A chromosome, complete genome	CP026999.1
					Bifidobacterium longum strain NCTC11818 genome assembly, chromosome: 1	LR134369.1
					Bifidobacterium longum subsp. longum strain BORI chromosome, complete genome	CP031133.1
					Bifidobacterium longum subsp. longum strain AH1206, complete genome	CP016019.1
					Bifidobacterium longum subsp. longum strain CCUG30698, complete genome	CP011965.1
			2	CGCCAGTGAATTGTAATACGATTCACTATAGGGCGAATTGGGCCCTCTAGATGCATGCTCGAGCGGCCGCCAGTGTGATGGATATCTGCAGAATTCGCCCTTGGAGACGAGAGGAAGCGACGGAACCGATGTGCTTCAGGTCATGGCCGTTGGCGTCAGCCTGAGCGATGCCTTCGATGAAGGCATCGATGACCTGCTCGTAACGCTCGAGCGAGAAGATCAGGGTGACGTTGACGGAGATGCCCTTAAGGGCGAATTCCAGCACACTGGCGGCCGTTACTAGTGGATCCGAGCTCGGTACCAA	Bifidobacterium pseudocatenulatum strain 12 chromosome, complete genome	CP025199.1
					Bifidobacterium pseudocatenulatum DSM 20438 = JCM 1200 = LMG 10505 DNA, complete genome	AP012330.1
					Bifidobacterium pseudocatenulatum strain N2 chromosome, complete genome	CP072504.1
					Bifidobacterium kashiwanohense PV20-2, complete genome	CP007456.1
					Bifidobacterium catenulatum subsp. kashiwanohense strain APCKJ1 chromosome, complete genome	CP026729.1
			3	AGCGGCCGCCAGTGTGATGGATATCTGCAGAATTCGCCCTTGGAACGAAGAAGGAAGCGACGGAGCCGATGTGCTTCAGGTCGTGGCCGTTGGCGTCAGCCTGGGCGATGCCCTCGATGAAGGCGTCGATGACCTGCTCGTAGCGCTCGAGCGAGAAGATCAGGGTGACGTTGACGGAGATGCCCTTAAGGGCGAATTCCAGCACACTGGCGGCCGTTACTAGTGGATCCGAGCTCGGTACCAAGCTTGGCGTAATCATGGTCATAGCTGTTTCCTGTGTGAA	Bifidobacterium longum Jih1 DNA, complete genome	AP022868.1
					Bifidobacterium breve strain IDCC4401 chromosome	CP045532.1
					Bifidobacterium breve isolate B.breve_1_mod genome assembly, chromosome: BILOC7D69C13_1	LR655209.1
					Bifidobacterium breve strain lw01 chromosome, complete genome	CP034192.1
					Bifidobacterium breve strain FDAARGOS_561 chromosome, complete genome	CP033841.1
			4	AGCGGCCGCCAGTGTGATGGATATCTGCAGAATTCGCCCTTGGAGCGAAGAAGGAAGCGACGGAACCGATGTGCTTCAGGTCATGGCCGTTGGCGTCAGCCTGAGCGATGCCTTCGATGAAGGCATCGATGACCTGCTCGTAACGCTCGAGCGAGAAGATCAGGGTGACGTTGACGGAGATGCCCTTAAGGGCGAATTCCAGCACACTGGCGGCCGTTACTAGTGGATCCGAGCTCGGTACCAAGCTTGGCGTAATCATGGTCATAGCTGTTTCCTGTGTGAA	Bifidobacterium pseudocatenulatum strain 12 chromosome, complete genome	CP025199.1
					Bifidobacterium pseudocatenulatum DSM 20438 = JCM 1200 = LMG 10505 DNA, complete genome	AP012330.1
					Bifidobacterium pseudocatenulatum strain N2 chromosome, complete genome	CP072504.1
					Bifidobacterium kashiwanohense PV20-2, complete genome	CP007456.1
					Bifidobacterium catenulatum subsp. kashiwanohense strain APCKJ1 chromosome, complete genome	CP026729.1
			5	GGCCGCCAGTGTGATGGATATCTGCAGAATTCGCCCTTAAGGGCATCTCCGTCAACGTCACCCTGATCTTCTCGCTCGAGCGTTACGAGCAGGTCATCGATGCCTTCATCGAGGCATCGCTCAGGCTGACGCCAACGGCCATGACCTGAAGCACATCGGTTCCGTCGCTTCCTTCTTCGTCTCCAAGGGCGAATTCCAGCACACTGGCGGCCGTTACTAGTGGATCCGAGCTCGGTACCAAGCTTGGCGTAATCATGGTCATAGCTGTTTCCTGTGTGA	Bifidobacterium pseudocatenulatum strain 12 chromosome, complete genome	CP025199.1
					Bifidobacterium pseudocatenulatum DSM 20438 = JCM 1200 = LMG 10505 DNA, complete genome	AP012330.1
					Bifidobacterium pseudocatenulatum strain N2 chromosome, complete genome	CP072504.1
					Bifidobacterium kashiwanohense PV20-2, complete genome	CP007456.1
					Bifidobacterium catenulatum subsp. kashiwanohense strain APCKJ1 chromosome, complete genome	CP026729.1
3	Candidate 44 (Ct: 19.52)	Bif_Ma_03	1	CGCCAGTGTGATGGATATCTGCAGAATTCGCCCTTGGAGCGAAGAAGGAAGCGACGGAGCCGATGTGCTTCAGGTCGTGGCCGTTGGCGTCAGCCTGGGCGATGCCCTCGATGAAGGCGTCGATGACCTGCTCGTAGCGCTCGAGCGAGAAGATCAGGGTGACGTTGACGGAGATGCCCTTAAGGGCGAATTCCAGCACACTGGCGGCCGTTACTAGTGGATCCGAGCTCGGTACCAAGCTTGGCGTAATCATGGTCATAGCTGTTTCCTGTGTGAA	Bifidobacterium longum Jih1 DNA, complete genome	AP022868.1
					Bifidobacterium longum strain Su859 genome assembly, chromosome: I	LT629712.1
					Bifidobacterium longum subsp. longum GT15, complete genome	CP006741.1
					Bifidobacterium longum strain BXY01, complete genome	CP008885.1
					Bifidobacterium longum subsp. suillum strain JCM 19995 chromosome, complete genome	CP070996.1
			2	CGCCAGTGTGATGGATATCTGCAGAATTCGCCCTTAAGGGCATCTCCGTCAACGTCACCCTGATCTTCTCACTCGAGCGTTACGAGCAGGTCATCGATGCCTTCATCGAAGGCATCGCTCAGGCTGACGCCAACGGCCATGACCTGAAGCACATCGGTTCCGTCGCTTCCTTCTTCGTCTCCAAGGGCGAATTCCAGCACACTGGCGGCCGTTACTAGTGGATCCGAGCTCGGTACCAAGCTTGGCGTAATCATGGTCATAGCTGTTTCCTGTGTGAA	Bifidobacterium pseudocatenulatum strain 12 chromosome, complete genome	CP025199.1
					Bifidobacterium pseudocatenulatum DSM 20438 = JCM 1200 = LMG 10505 DNA, complete genome	AP012330.1
					Bifidobacterium pseudocatenulatum strain N2 chromosome, complete genome	CP072504.1
					Bifidobacterium kashiwanohense PV20-2, complete genome	CP007456.1
					Bifidobacterium catenulatum subsp. kashiwanohense strain APCKJ1 chromosome, complete genome	CP026729.1
			3	CGCCAGTGTGATGGATATCTGCAGAATTCGCCCTTGGGAGACGAAGAAGGAAGCGACGGAACCGATGTGCTTCAGGTCATGGCCGTTGGCGTCAGCCTGAGCGATGCCTTCGATGAAGGCATCGATGACCTGCTCGTAACGCTCGAGCGAGAAGATCAGGGTGACGTTGACGGAGATGCCCTTAAGGGCGAATTCCAGCACACTGGCGGCCGTTACTAGTGGATCCGAGCTCGGTACCAAGCTTGGCGTAATCATGGTCATAGCTGTTTCCTGTGTGAAA	Bifidobacterium pseudocatenulatum strain 12 chromosome, complete genome	CP025199.1
					Bifidobacterium pseudocatenulatum DSM 20438 = JCM 1200 = LMG 10505 DNA, complete genome	AP012330.1
					Bifidobacterium pseudocatenulatum strain N2 chromosome, complete genome	CP072504.1
					Bifidobacterium kashiwanohense PV20-2, complete genome	CP007456.1
					Bifidobacterium catenulatum subsp. kashiwanohense strain APCKJ1 chromosome, complete genome	CP026729.1
			4	CGCCAGTGTGATGGATATCTGCAGAATTCGCCCTTGGAAGACGAAGAAGGAAGCGACGGAGCCGATGTGCTTCAGGTCGTGGCCGTTGGCGTCAGCCTGGGCGATGCCCTCGATGAAGGCGTCGATGACCTGCTCGTAGCGCTCGAGCGAGAAGATCAGGGTGACGTTGACGGAGATGCCCTTAAGGGCGAATTCCAGCACACTGGCGGCCGTTACTAGTGGATCCGAGCTCGGTACCAAGCTTGGCGTAATCATGGTCATAGCTGTTTCCTGTGTGAAA	Bifidobacterium longum Jih1 DNA, complete genome	AP022868.1
					Bifidobacterium longum strain Su859 genome assembly, chromosome: I	LT629712.1
					Bifidobacterium longum subsp. longum GT15, complete genome	CP006741.1
					Bifidobacterium longum strain BXY01, complete genome	CP008885.1
					Bifidobacterium longum subsp. suillum strain JCM 19995 chromosome, complete genome	CP070996.1
			5	CGGCCGCCAGTGTGATGGATATCTGCAGAATTCGCCCTTGGTTGCCTCTCAGACAATCAGTGGTATAGCGGATTCAGTGGTATCATTGAAGGGCGAATTCCAGCACACTGGCGGCCGTTACTAGTGGATCCGAGCTCGGTACCAAGCTTGGCGTAATCATGGTCATAGCTGTTTCCTGTGTGAAATTGTTATCCGC	Cloning vector pVMG0303_Cq-U6-6_2xBbsI_gRNA-Loop, complete sequence	MW925708.1
					Cloning vector pVMG0149_Cq-U6-6_2xBbsI-gRNA, complete sequence	MW925703.1
					Cloning vector pVMG0173_Cq-Actin5c-Cas9, complete sequence	MW925696.1
					Corynebacterium pseudotuberculosis strain SigM chromosome, complete genome	CP046955.1
					Cloning vector pVMG0252_Cq-vasa-Cas9_cdHAs_O, complete sequence	MW925705.1
4	Candidate 100 (Ct: 19.78)	Bif_Ma_04	1	CGCCAGTGTGATGGATATCTGCMGAATTCGCCCTTGGGACGAAGAAGGAAGCGACGGAACCGATGTGCTTCAGGTCATGGCCGTTGGCGTCAGCCTGAGCGATGCCTTCGATGAAGGCATCGATGACCTGCTCGTAACGCTCGAGCGAGAAGATCAGGGTGACGTTGACGGAGATGCCCTTAAGGGCGAATTCCAGCACACTGGCGGCCGTTACTAGTGGATCCGAGCTCGGTACCAAGCTTGGCGTAATCATGGTCATAGCTGTTTCCTGTGTGAAATGGGTTATCCGCA	Bifidobacterium pseudocatenulatum strain 12 chromosome, complete genome	CP025199.1
					Bifidobacterium pseudocatenulatum DSM 20438 = JCM 1200 = LMG 10505 DNA, complete genome	AP012330.1
					Bifidobacterium kashiwanohense PV20-2, complete genome	CP007456.1
					Bifidobacterium catenulatum subsp. kashiwanohense strain APCKJ1 chromosome, complete genome	CP026729.1
					Bifidobacterium breve strain IDCC4401 chromosome	CP045532.1
			2	CGCCAGTGTGATGGATMTCTGCAGAATTCGCCCTTGGAGACGAGAAGGAAGCGACGGAGCCGATGTGCTTCAGGTCGTGGCCGTTGGCGTCAGCCTGGGCGATGCCCTCGATGAAGGCGTCGATGACCTGCTCGTAGCGCTCGAGCGAGAAGATCAGGGTGACGTTGACGGAGATGCCCTTAAGGGCGAATTCCAGCACACTGGCGGCCGTTACTAGTGGATCCGAGCTCGGTACCAAGCTTGGCGTAATCATGGTCATAGCTGTTTCCTGTGTGATTKGGTTATCCGCA	Bifidobacterium longum Jih1 DNA, complete genome	AP022868.1
					Bifidobacterium longum strain Su859 genome assembly, chromosome: I	LT629712.1
					Bifidobacterium longum subsp. longum GT15, complete genome	CP006741.1
					Bifidobacterium breve strain IDCC4401 chromosome	CP045532.1
					Bifidobacterium breve isolate B.breve_1_mod genome assembly, chromosome: BILOC7D69C13_1	LR655209.1
			3	CGCCAGTGTGATGGATATCTGCAGAATTCGCCCTTGGAGGACGAAGAAGGAAGCGACGGAACCGATGTGCTTCAGGTTAYGGCCGTTGGCGTCAGCCTGAGCGATGCCTTCGATGAAGGCATCGATGACCTGCTCGTAACGCTCGAGCGAGAAGATCAGGGTGACGTTGACGGAGATGCCCTTAAGGGCGAATTCCAGCACACTGGCGGCCGTTACTAGTGGATCCGAGCTCGGTACCAAGCTTGGCGTAATCATGGTCATAGCTGTTTCCTGTGTGAATTRGGTTTATCCGCA	Bifidobacterium pseudocatenulatum strain 12 chromosome, complete genome	CP025199.1
					Bifidobacterium pseudocatenulatum DSM 20438 = JCM 1200 = LMG 10505 DNA, complete genome	AP012330.1
					Bifidobacterium kashiwanohense PV20-2, complete genome	CP007456.1
					Bifidobacterium catenulatum subsp. kashiwanohense strain APCKJ1 chromosome, complete genome	CP026729.1
					Bifidobacterium breve strain IDCC4401 chromosome	CP045532.1
			4	CGCCAGTGTGATGGAYTCTGCAGAATTCGCCCTTGAGACGAAGAAGGAAGCGACGGAACCGATGTGCTTCAGGTCATGGCCGTTGGCGTCAGCCTGAGCGATGCCTTCGATGAAGGCATCGATGACCTGCTCGTAACGCTCGAGCGAGAAGATCAGGGTGACGTTGACGGAGAYGCCCTTAAGGGCGAATTCCAGCACACTGGCGGCCGTTACTAGTGGATCCGAGCTCGGTACCAAGCTTGGCGTAATCATGGTCATAGCTGTTTCCTGTGTGAATRAGTTATCCGCA	Bifidobacterium pseudocatenulatum strain 12 chromosome, complete genome	CP025199.1
					Bifidobacterium pseudocatenulatum DSM 20438 = JCM 1200 = LMG 10505 DNA, complete genome	AP012330.1
					Bifidobacterium kashiwanohense PV20-2, complete genome	CP007456.1
					Bifidobacterium catenulatum subsp. kashiwanohense strain APCKJ1 chromosome, complete genome	CP026729.1
					Bifidobacterium breve strain IDCC4401 chromosome	CP045532.1
			5	CGCCAGTGTGATGGATATCTGCAGAATTCGCCCTTAAGGGCAYCTCCGTCAACGTCACCCTGATCTTCTCGCTCGAGCGTTACGAGCAGGTCATCGATGCCTTCATCGAGGCATCGCTCAGGCYGACGCCAACGGCCATGACCTGAAGCACATCGGTTCCGTCGCTTCCTTCTTCGTCTCCAAGGGCGAATTCCAGCACACTGGCGGCCGTTACTAGTGGATCCGAGCTCGGTACCAAGCTTGGCGTAATCATGGTCATAGCTGTTTCCTGTGTGAAYKGGTTWATCCGCA	Bifidobacterium pseudocatenulatum strain 12 chromosome, complete genome	CP025199.1
					Bifidobacterium pseudocatenulatum DSM 20438 = JCM 1200 = LMG 10505 DNA, complete genome	AP012330.1
					Bifidobacterium kashiwanohense PV20-2, complete genome	CP007456.1
					Bifidobacterium catenulatum subsp. kashiwanohense strain APCKJ1 chromosome, complete genome	CP026729.1
					Bifidobacterium breve strain IDCC4401 chromosome	CP045532.1
5	Candidate 6 (Ct: 20.23)	Bif_Ma_05	1	CGCCAGTGTGATGGATATYCTGCAGAATTCGCCCTTGGAGACGAAGAAGGAAGCGATCCAYGGGCCGTGGTGATGGTTGGCCGGAACCYGCCGATAGGGTCCTTTGTCCGGTTGAACGGCGAGGAGTACCGACGGGATTCATTGACGGGGCYGCTCAACCGCAACGCTTTCGACGATGATGTGGAATTCATCCAAGCCACCCATGACAAGCCGTTGACGGAGATGCCCTTAAGGGCGAATTCCAGCACACTGGCGGCCGTTACTAGTGGATCCGAGCTCGGTACCAAGCTTGGCGTAATCATGGTCATAGCTGTTTCCTGTGTGAA	Bifidobacterium adolescentis strain P2P3 chromosome, complete genome	CP024959.1
					Bifidobacterium adolescentis strain 6 chromosome, complete genome	CP023005.1
					Bifidobacterium adolescentis isolate MGYG-HGUT-02395 genome assembly, chromosome: 1	LR698990.1
					Bifidobacterium adolescentis strain PRL2019 chromosome, complete genome	CP053072.1
					Bifidobacterium adolescentis strain ZJ2 chromosome, complete genome	CP047129.1
			2	CGCCAGTGTGATGGATATCTGCAGAATTCGCCCTTGGAAGACGAAGAAGGAAGCGACGGAGCCGATGTGCTTCAGGTCGTGGCCGTTGGCGGCAGCCTGAGCGATGCCCTCGATGTAAGCGTCAATGACCTGCTCGTAGCGCTCGAGCGAGAAGATCAGGGTGACGTTGACGGAGATGCCCTTAAGGGCGAATTCCAGCACACTGGCGGCCGTTACTAGTGGATCCGAGCTCGGTACCAAGCTTGGCGTAATCATGGTCATAGCTGTTTCCTGTGTGAA	Bifidobacterium longum strain 51A chromosome, complete genome	CP026999.1
					Bifidobacterium longum strain NCTC11818 genome assembly, chromosome: 1	LR134369.1
					Bifidobacterium longum subsp. longum strain BORI chromosome, complete genome	CP031133.1
					Bifidobacterium longum subsp. longum strain AH1206, complete genome	CP016019.1
					Bifidobacterium longum subsp. longum strain CCUG30698, complete genome	CP011965.1
			3	CGCCAGTGTGATGGATATCTGCAGAATTCGCCCTTGGAGCGAAGAAGGAAGCGACGGAGCCGATGTGCTTCAGGTCGTGGCCGTTGGCGGCAGCCTGAGCGATGCCCTCGATGTAAGCGTCAATGACCTGCTCGTAGCGCTCGAGCGAGAAGATCAGGGTGACGTTGACGGAGATGCCCTTAAGGGCGAATTCCAGCACACTGGCGGCCGTTACTAGTGGATCCGAGCTCGGTACCAAGCTTGGCGTAATCATGGTCATAGCTGTTTCCTGTGTGAA	Bifidobacterium longum strain 51A chromosome, complete genome	CP026999.1
					Bifidobacterium longum strain NCTC11818 genome assembly, chromosome: 1	LR134369.1
					Bifidobacterium longum subsp. longum strain BORI chromosome, complete genome	CP031133.1
					Bifidobacterium longum subsp. longum strain AH1206, complete genome	CP016019.1
					Bifidobacterium longum subsp. longum strain CCUG30698, complete genome	CP011965.1
			4	CGCCAGTGTGATGGATATCTGCAGRATTCGCCCTTGGAGGACGAAGAAGGAAGCGACGGAGCCGATGTGCTTCAGGTCGTGGCCGTTGGCGTCAGCCTGGGCGATGCCCTCGATGAAGGCGTCGATGACCTGCTCGTAGCGCTCGAGCGAGAAGATCAGGGTGACGTTGACGGAGATGCCCTTAAGGGCGAATTCCAGCACACTGGCGGCCGTTACTAGTGGATCCGAGCTCGGTACCAAGCTTGGCGTAATCATGGTCATAGCTGTTTCCTGTGTGAAA	Bifidobacterium longum Jih1 DNA, complete genome	AP022868.1
					Bifidobacterium longum strain Su859 genome assembly, chromosome: I	LT629712.1
					Bifidobacterium longum subsp. longum GT15, complete genome	CP006741.1
					Bifidobacterium longum strain BXY01, complete genome	CP008885.1
					Bifidobacterium longum subsp. suillum strain JCM 19995 chromosome, complete genome	CP070996.1
			5	TGATGGATATCTGCAGAATTCSCCCTTGGTGCCTCTCAGACAATCAGCGGTATCATTGAGCGGATTCAGTGGTATCATTGAAGGGCGAATTCCAGCACACTGGCGGCCGTTACTAGTGGATCCGAGCTCGGTACCAAGCTTGGCGTAATCATGGTCATAGCTGTTTCCTGTGTGAATTGTTATCCGCA	Cloning vector pVMG0303_Cq-U6-6_2xBbsI_gRNA-Loop, complete sequence	MW925708.1
					Cloning vector pVMG0149_Cq-U6-6_2xBbsI-gRNA, complete sequence	MW925703.1
					Cloning vector pVMG0173_Cq-Actin5c-Cas9, complete sequence	MW925696.1
					Corynebacterium pseudotuberculosis strain SigM chromosome, complete genome	CP046955.1
					Cloning vector pVMG0252_Cq-vasa-Cas9_cdHAs_O, complete sequence	MW925705.1

## Sheet: Bifidobacterium_Low
Supplementary Table S7. Bacterial identification results of each genus by BLAST test
Bifidobacterium sp. Low Top 5 BLAST Results
No.	Sample	Name	Colony no.	Input sequence	Description	Accession
1	Candidate 50 (Ct: 29.14)	Bif_Mi_01	1	GGCCGCCAGTGTGATGGATATCTGCAGAATTCGCCCTTGGTGCCTCTCAGACAATCAGTGTATCATTGAGCGGATTCAGTGGTATCATTGAAGGGCGAATTCCAGCACACTGGCGGCCGTTACTAGTGGATCCGAGCTCGGTACCAAGCTTGGCGTAATCATGGTCATAGCTGTTTCCTGTGTGAATTGWTATCCGCA	Cloning vector pVMG0303_Cq-U6-6_2xBbsI_gRNA-Loop, complete sequence	MW925708.1
					Cloning vector pVMG0149_Cq-U6-6_2xBbsI-gRNA, complete sequence	MW925703.1
					Cloning vector pVMG0173_Cq-Actin5c-Cas9, complete sequence	MW925696.1
					Corynebacterium pseudotuberculosis strain SigM chromosome, complete genome	CP046955.1
					Cloning vector pVMG0252_Cq-vasa-Cas9_cdHAs_O, complete sequence	MW925705.1
			2	TCGAGCGGCCGCCAGTGTGATGGATATCTGCAGAATTCGCCCTTAAGGCATCTCCGTCAACGTCACCCTGATCTTCTCGCTCGAGCGTTACGAGCAGGTCATCGATGCCTTCATCGAAGGCATCGCTCAGGCTGACGCCAACGGCCATGACCTGAAGCACATCGGTTCCGTCGCTTCCTTCTTCGTCTCCAAGGGCGAATTCCAGCACACTGGCGGCCGTTACTAGTGGATCCGAGCTCGGTACCAAGCTTGGCGTAATCATGGTCATAGCTGTTTCCTGTGTGA	Bifidobacterium pseudocatenulatum strain 12 chromosome, complete genome	CP025199.1
					Bifidobacterium pseudocatenulatum DSM 20438 = JCM 1200 = LMG 10505 DNA, complete genome	AP012330.1
					Bifidobacterium pseudocatenulatum strain N2 chromosome, complete genome	CP072504.1
					Bifidobacterium kashiwanohense PV20-2, complete genome	CP007456.1
					Bifidobacterium catenulatum subsp. kashiwanohense strain APCKJ1 chromosome, complete genome	CP026729.1
			3	GCCGCCAGTGTGATGGATATCTGCAGAATTCGCCCTTGGAGACGAAGAAGGAAGCGACGGAACCGATGTGCTTCAGGTCATGGCCGTTGCCGCCAGCCTGAGCGATGCCTTCGATGAAGGCATCGATGACCTGCTCGTAACGCTCGAGCGAGAAGATCAGGGTGACGTTGACGGAATGCCCTTAAGGGCGAATTCCAGCACACTGGCGGCCGTTACTAGTGGATCCGAGCTCGGTACCAAGCTTGGCGTAATCATGGTCATAGCTGTTTCCTGTGTG	Bifidobacterium pseudocatenulatum strain 12 chromosome, complete genome	CP025199.1
					Bifidobacterium pseudocatenulatum DSM 20438 = JCM 1200 = LMG 10505 DNA, complete genome	AP012330.1
					Bifidobacterium pseudocatenulatum strain N2 chromosome, complete genome	CP072504.1
					Bifidobacterium kashiwanohense PV20-2, complete genome	CP007456.1
					Bifidobacterium catenulatum subsp. kashiwanohense strain APCKJ1 chromosome, complete genome	CP026729.1
			4	GGATATCTGCAGAATTCGCCCTTGGTGCCTCTCAGACAATCAGCAGAGCGGATTCAGTGGTATCATTGAAGGGCGAATTCCAGCACACTGGCGGCCGTTACTAGTGGATCCGAGCTCGGTACCAAGCTTGGCGTAATCATGGTCATAGCTGTTTCCTGTGTGA	Cloning vector pVMG0303_Cq-U6-6_2xBbsI_gRNA-Loop, complete sequence	MW925708.1
					Cloning vector pVMG0149_Cq-U6-6_2xBbsI-gRNA, complete sequence	MW925703.1
					Cloning vector pVMG0173_Cq-Actin5c-Cas9, complete sequence	MW925696.1
					Corynebacterium pseudotuberculosis strain SigM chromosome, complete genome	CP046955.1
					Cloning vector pVMG0252_Cq-vasa-Cas9_cdHAs_O, complete sequence	MW925705.1
			5	WAGCGGCCGCCAGTGTGATGGATATCTGCAGAATTCGCCCTTGGTGCCTCTCAGACAATCAGTGGTATCATGGCGGATTCAGTGGTATCATTGAGCGGATTCAGTGGTATCATTGAAGGGCGAATTCCAGCACACTGGCGGCCGTTACTAGTGGATCCGAGCTCGGTACCAAGCTTGGCGTAATCATGGTCATAGCTGTTTCCTGTGTGAA	Cloning vector pVMG0303_Cq-U6-6_2xBbsI_gRNA-Loop, complete sequence	MW925708.1
					Cloning vector pVMG0149_Cq-U6-6_2xBbsI-gRNA, complete sequence	MW925703.1
					Cloning vector pVMG0173_Cq-Actin5c-Cas9, complete sequence	MW925696.1
					Corynebacterium pseudotuberculosis strain SigM chromosome, complete genome	CP046955.1
					Cloning vector pVMG0252_Cq-vasa-Cas9_cdHAs_O, complete sequence	MW925705.1
2	Candidate 77 (Ct: 28.80)	Bif_Mi_02	1	AGCGGCCGCCAGTGTGATGGATATCTGCAGAATTCGCCCTTGGAGCGAAGAAGGAAGCGACGGAACTGATGTGCTTCAGGTCATGGCCGTTGGCGTCAGCCTGAGCGATGCCTTCGATGAAGGCATCGATGACCTGCTTGTAACGCTCGAGCGAGAAGATCAGGGTGACGTTGACGGAGATGCCCTTAAGGGCGAATTCCAGCACACTGGCGGCCGTTACTAGTGGATCCGAGCTCGGTACCAAGCTTGGCGTAATCATGGTCATAGCTGTTTCCTGTGTGA	Bifidobacterium pseudocatenulatum strain 12 chromosome, complete genome	CP025199.1
					Bifidobacterium pseudocatenulatum DSM 20438 = JCM 1200 = LMG 10505 DNA, complete genome	AP012330.1
					Bifidobacterium pseudocatenulatum strain N2 chromosome, complete genome	CP072504.1
					Bifidobacterium kashiwanohense PV20-2, complete genome	CP007456.1
					Bifidobacterium catenulatum subsp. kashiwanohense strain APCKJ1 chromosome, complete genome	CP026729.1
			2	GCCGCCAGTGTGCTGGAATTCGCCCTTCAATGATACCACTGAATCCGCTCAATGATACACTGATTGTCTGAGAGGCACCAAGGGCGAATTCTGCAGATATCCATCACACTGGCGGCMGCTCGAGCATGCATCTAGAGGGCCCAATTCGCCCTATAGTGAATCGTATTACAATTCACT	Expression vector pVG186_y1-w2, complete sequence	MN551088.1
					Expression vector pVG303_nanos-Cas9, complete sequence	MN551087.1
					Expression vector pVG312_vasa-DD2-Cas9, complete sequence	MN551086.1
					Expression vector pVG182, complete sequence	MN551085.1
					Neurospora cloning vector pTH1112.8, complete sequence	JF749201.1
			3	GAGCGGCCGCCAGTGTGATGGATATCTGCAGAATTCGCCCTTAAGGGCATCTCCGTCAACGTCACCTGATCTTCTCGCTCGAGCGTTACGAGCAGGTCATCGATGCCTTCATCGAAGGCATCGCTCAGGCTGACGCCAACGGCCATGACCTGAAGCACATCGGTTCCGTCGCTTCCTTCTTCGTCTCCAAGGGCGAATTCCAGCACACTGGCGGCCGTTACTAGTGGATCCGAGCTCGGTACCAAGCTTGGCGTAATCATGGTCATAGCTGTTTCCTGTGTGA	Bifidobacterium pseudocatenulatum strain 12 chromosome, complete genome	CP025199.1
					Bifidobacterium pseudocatenulatum DSM 20438 = JCM 1200 = LMG 10505 DNA, complete genome	AP012330.1
					Bifidobacterium pseudocatenulatum strain N2 chromosome, complete genome	CP072504.1
					Bifidobacterium kashiwanohense PV20-2, complete genome	CP007456.1
					Bifidobacterium catenulatum subsp. kashiwanohense strain APCKJ1 chromosome, complete genome	CP026729.1
			4	CCAGTGTGCTGGAATTCGCCCTTCAATGATACCACTGAATCCGCTCAATGATACCGCTGATTGTCTGAGAGGCACCAAGGGCGAATTCTGCAGATATCCATCACACTGGCGGCCGCTCGAGCATGCATCTAGAGGGCCCAATTCGCCCTATAGTGAATCGTATTACAATTCAC	Expression vector pVG186_y1-w2, complete sequence	MN551088.1
					Expression vector pVG303_nanos-Cas9, complete sequence	MN551087.1
					Expression vector pVG312_vasa-DD2-Cas9, complete sequence	MN551086.1
					Expression vector pVG182, complete sequence	MN551085.1
					Neurospora cloning vector pTH1112.8, complete sequence	JF749201.1
			5	ATTCACACAGGAAACAGCTATGACCATGATTACGCCAAGCTTGGTACCGAGCTCGGATCCACTAGTAACGGCCGCCAGTGTGCTGGAATTCGCCCTTCAATGATACCACTGAATCCGCTCAATGATACACTGATTGTCTGAGAGGCACCAAGGGCGAATTCTGCAGATATCCATCACACTG	Cloning vector pVMG0303_Cq-U6-6_2xBbsI_gRNA-Loop, complete sequence	MW925708.1
					Cloning vector pVMG0149_Cq-U6-6_2xBbsI-gRNA, complete sequence	MW925703.1
					Cloning vector pVMG0173_Cq-Actin5c-Cas9, complete sequence	MW925696.1
					Corynebacterium pseudotuberculosis strain SigM chromosome, complete genome	CP046955.1
					Cloning vector pVMG0252_Cq-vasa-Cas9_cdHAs_O, complete sequence	MW925705.1
3	Candidate 83 (Ct: 28.65)	Bif_Mi_03	1	TCGAGCGGCCGCCAGTGTGATGGATATCTGCAGAATTCGCCCTTGGAGAACGAAGAAGGAAGCGACGGAGCCGATGTGCTTCAGGTCGTGGCCGTTGGCGTCAGCCTGGGCGATGCCCTCGATGAAGGCGTCGATGACCTGCTCGTAGCGCTCGAGCGAGAAGATCAGGGTGACGTTGACGGAGATGCCCTTAAGGGCGAATTCCMGCACACTGGCGGCCGTTACTAGTGGATCCGAGCTCGGTACCAAGCTTGGCGTAATCATGGTCATAGCTGTTTCCTGTGTGAA	Bifidobacterium longum Jih1 DNA, complete genome	AP022868.1
					Bifidobacterium longum strain Su859 genome assembly, chromosome: I	LT629712.1
					Bifidobacterium longum subsp. longum GT15, complete genome	CP006741.1
					Bifidobacterium longum strain BXY01, complete genome	CP008885.1
					Bifidobacterium longum subsp. suillum strain JCM 19995 chromosome, complete genome	CP070996.1
			2	TCGAGCGGCCGCCAGTGTGATGGATATCTGCAGAATTCGCCCTTGGAGACCGAAGAAGGAAGCGACGGAGCCGATGTGCTTCAGGTCGTGGCCGTTGACGGCAGCCTGAGCGATGCCCTCGATGTAAGCGTCGATGACCTGCTCGTAGCGCTCGAGCGAGAAGATCAGGGTGACGTTGACGGAGATGCCCTTAAGGGCGAATTCCAGCACACTGGCGGCCGTTACTAGTGGATCCGAGCTCGGTACCAAGCTTGGCGTAATCATGGTCATAGCTGTTTCCTGTGTGA	Bifidobacterium longum strain 51A chromosome, complete genome	CP026999.1
					Bifidobacterium longum strain NCTC11818 genome assembly, chromosome: 1	LR134369.1
					Bifidobacterium longum subsp. longum strain BORI chromosome, complete genome	CP031133.1
					Bifidobacterium longum subsp. longum strain AH1206, complete genome	CP016019.1
					Bifidobacterium longum subsp. longum strain CCUG30698, complete genome	CP011965.1
			3	AGCGGCCGCCAGTGTGATGGATATCTGCAGAATTCGCCCTTAGGGCATCTCCGTCAACGTCACCCTGATCTTCTCGCTCGAGCGTTACGAGCAGGTCATCGATGCCTTCATCGAAGGCATCGCTCAGGCTGACGCCAACGGCCATGACCTGAAGCACATCGGTTCCGTCGCTTCCTTCTTCGTCTCCAAGGGCGAATTCCAGCACACTGGCGGCCGTTACTAGTGGATCCGAGCTCGGTACCAAGCTTGGCGTAATCATGGTCATAGCTGTTTCCTGTGTGA	Bifidobacterium pseudocatenulatum strain 12 chromosome, complete genome	CP025199.1
					Bifidobacterium pseudocatenulatum DSM 20438 = JCM 1200 = LMG 10505 DNA, complete genome	AP012330.1
					Bifidobacterium pseudocatenulatum strain N2 chromosome, complete genome	CP072504.1
					Bifidobacterium kashiwanohense PV20-2, complete genome	CP007456.1
					Bifidobacterium catenulatum subsp. kashiwanohense strain APCKJ1 chromosome, complete genome	CP026729.1
			4	TGATTACGCCAAGCTTGGTACCGAGCTCGGATCCACTAGTAACGGCCGCCAGTGTGCTGGAATTCGCCCTTCAATGATACCACTGAATCCGCTCAATGATACACTGATTGTCTGAGAGGCACCAAGGGCGAATTCTGCAGATATCCATCACACTGGCGGCCGCTCGAKGCAKGCATMYAGAKGSACC	Cloning vector pVMG0303_Cq-U6-6_2xBbsI_gRNA-Loop, complete sequence	MW925708.1
					Cloning vector pVMG0149_Cq-U6-6_2xBbsI-gRNA, complete sequence	MW925703.1
					Uncultured bacterium partial arsC gene for arsenate reductase, clone AS-P9-F5	FN646109.1
					Uncultured bacterium partial arsC gene for arsenate reductase, clone AS-P9-D8	FN646107.1
					Uncultured bacterium partial 16S rRNA gene, clone A20	AJ853926.1
			5	AGGAAACAGCTATGACCATGATTACGCCAAGCTTGGTACCGAGCTCGGATCCACTAGTAACGGCCGCCAGTGTGCTGGAATTCGCCCTTCAATGATACCACTGAATCCGCTATACCACTGATTGTCTGAGAGGCAACCAAGGGCGAATTCTGCAGATATCCATCACACTGGCG	Cloning vector pVMG0303_Cq-U6-6_2xBbsI_gRNA-Loop, complete sequence	MW925708.1
					Cloning vector pVMG0149_Cq-U6-6_2xBbsI-gRNA, complete sequence	MW925703.1
					Uncultured bacterium partial 16S rRNA gene, clone A11	AJ786610.1
					Cloning vector pVMG0173_Cq-Actin5c-Cas9, complete sequence	MW925696.1
					Corynebacterium pseudotuberculosis strain SigM chromosome, complete genome	CP046955.1
4	Candidate 48 (Ct: 27.87)	Bif_Mi_04	1	CGCCAGTGTGATGGATATCTGCAGAATTCGCCCTTAGGGCATCTCCGTCAACGTCACCCTGACCTTCTCGCTCGAGCGTTACGAGCAGGTCATCGATGCCTTCATCGAAGGCATCGCTCAGGCTGACGCCAACGGCCATGACCTGAAGCACATCGGTTCCGTCGCTTCCTTCTTCGTCTCCAAGGGCGAATTCCAGCACACTGGCGGCCGTTACTAGTGGATCCGAGCTCGGTACCAAGCTTGGCGTAATCATGGTCATAGCTGTTTCCTGTGTGAAA	Bifidobacterium pseudocatenulatum strain 12 chromosome, complete genome	CP025199.1
					Bifidobacterium pseudocatenulatum DSM 20438 = JCM 1200 = LMG 10505 DNA, complete genome	AP012330.1
					Bifidobacterium pseudocatenulatum strain N2 chromosome, complete genome	CP072504.1
					Bifidobacterium kashiwanohense PV20-2, complete genome	CP007456.1
					Bifidobacterium catenulatum subsp. kashiwanohense strain APCKJ1 chromosome, complete genome	CP026729.1
			2	CGCCAGTGTGATGGATATCTGCAGAATTCGCCCTTGGAGGACGAAGAAGGAAGCGACGGAGCCGATGTGCTTCAGGTCGTGGCCGTTGGCGTCAGCCTGGGCGATGCCCTCGATGTAGGCGTCGATGACCTGCTCGTAACGCTCCAGGGAGAAGATCAGGGTGACGTTGACGGAGATGCCCTTAAGGGCGAATTCCAGCACACTGGCGGCCGTTACTAGTGGATCCGAGCTCGGTACCAAGCTTGGCGTAATCATGGTCATAGCTGTTTCCTGTGTGAAA	Bifidobacterium adolescentis strain ZJ2 chromosome, complete genome	CP047129.1
					Bifidobacterium adolescentis strain P2P3 chromosome, complete genome	CP024959.1
					Bifidobacterium adolescentis strain 6 chromosome, complete genome	CP023005.1
					Bifidobacterium adolescentis strain 1-11 chromosome, complete genome	CP028341.1
					Bifidobacterium adolescentis isolate MGYG-HGUT-02395 genome assembly, chromosome: 1	LR698990.1
			3	GCCAGTGAATTGTAATACGATTCACTATAGGGCGAATTGGGCCCTCTAGATGCATGCTCGAGCKGCCGCCAGTGTGATGGATATCTGCAGAATTCGCCCTTGGAGCGAAGAAGGAAGCGACGGAACCGATGTGCTTCAGGTCATGGCCGTTGGCGTCAGCCTGAGCGATGCCTTCGATGAAGGCATCGATGACCTGCTCGTAACGCTCGAGCGAGAAGATCAGGGTGACGTTGACGGAGATGCCCTTAAGGGCGAATTCCAGCACACTGGCGGCCGTTACTAGTGGATCYGAGCTCGGTRCCAA	Bifidobacterium pseudocatenulatum strain 12 chromosome, complete genome	CP025199.1
					Bifidobacterium pseudocatenulatum DSM 20438 = JCM 1200 = LMG 10505 DNA, complete genome	AP012330.1
					Bifidobacterium pseudocatenulatum strain N2 chromosome, complete genome	CP072504.1
					Bifidobacterium kashiwanohense PV20-2, complete genome	CP007456.1
					Bifidobacterium catenulatum subsp. kashiwanohense strain APCKJ1 chromosome, complete genome	CP026729.1
			4	CGGATAACAATTCACACAGGAAACAGCTATGACCATGATTACGCCAAGCTTGGTACCGAGCTCGGATCCACTAGTAACGGCCGCCAGTGTGCTGGAATTCGCCCTTCAATGATACCACTGAATCCGCTCAATGATACCGCTGATTGTCTGAGAGGCACCAAGGGSGAATTCTGCAGATATCCATCACACTGGCGGCCGCT	Cloning vector pVMG0303_Cq-U6-6_2xBbsI_gRNA-Loop, complete sequence	MW925708.1
					Cloning vector pVMG0149_Cq-U6-6_2xBbsI-gRNA, complete sequence	MW925703.1
					Cloning vector pVMG0173_Cq-Actin5c-Cas9, complete sequence	MW925696.1
					Corynebacterium pseudotuberculosis strain SigM chromosome, complete genome	CP046955.1
					Cloning vector pVMG0252_Cq-vasa-Cas9_cdHAs_O, complete sequence	MW925705.1
			5	GAGCGGCCGCCAGTGTGCTGGAATTCGCCCTTGGAGACGAAGAAGGAAGCGACGGAGCCGATGTGCTTCAGGTCGTGGCCGTTGGCGTCAGCCTGGGCGATGCCCTCGATGAAGGCGTCGATGACCTGCTCGTAGCGCTCGAGCGAGAAGATCAGGGTGACGTTGACGGAGATGCCCTTAAGGGCGAATTCTGCAGATATCCATCACACTGGCGGCCGTTACTAGTGGATCCGAGCTCGGTACCAAGCTTGGCGTAATCATGGTCATAGCTGTTTCCTGTGTG	Bifidobacterium longum Jih1 DNA, complete genome	AP022868.1
					Bifidobacterium longum strain Su859 genome assembly, chromosome: I	LT629712.1
					Bifidobacterium longum subsp. longum GT15, complete genome	CP006741.1
					Bifidobacterium longum strain BXY01, complete genome	CP008885.1
					Bifidobacterium longum subsp. suillum strain JCM 19995 chromosome, complete genome	CP070996.1
5	Candidate 20 (Ct: 27.73)	Bif_Mi_05	1	CGCCAGTGTGATGGATATCTGCAGAATTCGCCCTTGGAAGACGAAGAAGGAAGCGACGGAACCGATGTGCTTCAGGTCATGGCCGTTGGCGTCAGCCTGAGCGATGCCTTCGATGAAGGCATCGATGACCTGCTCGTAACGCTCGAGCGAGAAGATCAGGGTGACGTTGACGGAGATGCCCTTAAGGGCGAATTCCAGCACACTGGCGGCCGTTACTAGTGGATCCGAGCTCGGTACCAAGCTTGGCGTAATCATGGTCATAGCTGTTTCCTGTGTGAA	Bifidobacterium pseudocatenulatum strain 12 chromosome, complete genome	CP025199.1
					Bifidobacterium pseudocatenulatum DSM 20438 = JCM 1200 = LMG 10505 DNA, complete genome	AP012330.1
					Bifidobacterium pseudocatenulatum strain N2 chromosome, complete genome	CP072504.1
					Bifidobacterium kashiwanohense PV20-2, complete genome	CP007456.1
					Bifidobacterium catenulatum subsp. kashiwanohense strain APCKJ1 chromosome, complete genome	CP026729.1
			2	GAGCGGCCGCCAGTGTGATGGATATCTGCAGAATTCGCCCTTAAGGGCATCTCCGTCAACGTCACCCTGATCTCCTCGCTCGAGCGTTACGAGCAGGTCATCGATGCCTTCATCGAAGGCATCGCTCAGGCTGACGCCAACGGCCATGACCTGAAGCACATCGGTTCCGTCGCTTCCTTCTTCGTCTCCAAGGGCGAATTCCAGCACACTGGCGGCCGTTACTAGTGGATCCGAGCTCGGTACCAAGCTTGGCGTAATCATGGTCATAGCTGTTTCCTGTGTGAA	Bifidobacterium pseudocatenulatum strain 12 chromosome, complete genome	CP025199.1
					Bifidobacterium pseudocatenulatum DSM 20438 = JCM 1200 = LMG 10505 DNA, complete genome	AP012330.1
					Bifidobacterium pseudocatenulatum strain N2 chromosome, complete genome	CP072504.1
					Bifidobacterium kashiwanohense PV20-2, complete genome	CP007456.1
					Bifidobacterium catenulatum subsp. kashiwanohense strain APCKJ1 chromosome, complete genome	CP026729.1
			3	CGGCCGCCAGTGTGATGGATATCTGCAGAATTCGCCCTTGGAGACAAGAGGAAGCGACGGAACCGATGTGCTTCAGGTCATGGCCGTTGGCGTCAGCCTGAGCGATGCCTTCGATGAAGGCATCGATGACCTGCTCGTAACGCTCGAGCGAGAAGATCAGGGTGACGTTGACGGAGATGCCCTTAAGGGCGAATTCCAGCACACTGGCGGCCGTTACTAGTGGATCCGAGCTCGGTACCAAGCTTGGCGTAATCATGGTCATAGCTGTTTCCTGTGTG	Bifidobacterium pseudocatenulatum strain 12 chromosome, complete genome	CP025199.1
					Bifidobacterium pseudocatenulatum DSM 20438 = JCM 1200 = LMG 10505 DNA, complete genome	AP012330.1
					Bifidobacterium pseudocatenulatum strain N2 chromosome, complete genome	CP072504.1
					Bifidobacterium kashiwanohense PV20-2, complete genome	CP007456.1
					Bifidobacterium catenulatum subsp. kashiwanohense strain APCKJ1 chromosome, complete genome	CP026729.1
			4	CGAGCGGCCGCCAGTGTGATGGATATCTGCAGAATTCGCCCTTGGAAGACGAAGAAGGAAGCGACGGAACCGATGTGCTTCAGGTCATGGCCGTTGGCGTCAGCCTGAGCGATGCCTTCGATGAAGGCATCGATGACCTGCTCGTAACGCTCGAGCGAGAAGATCAGGGTGACGTTGACGGAGATGCCCTTAAGGGCGAATTCCAGCACACTGGCGGCCGTTACTAGTGGATCCGAGCTCGGTACCAAGCTTGGCGTAATCATGGTCATAGCTGTTTCCTGTGTGA	Bifidobacterium pseudocatenulatum strain 12 chromosome, complete genome	CP025199.1
					Bifidobacterium pseudocatenulatum DSM 20438 = JCM 1200 = LMG 10505 DNA, complete genome	AP012330.1
					Bifidobacterium pseudocatenulatum strain N2 chromosome, complete genome	CP072504.1
					Bifidobacterium kashiwanohense PV20-2, complete genome	CP007456.1
					Bifidobacterium catenulatum subsp. kashiwanohense strain APCKJ1 chromosome, complete genome	CP026729.1
			5	CCAGTGAATTGTAATACGATTCACTATAGGGCGAATTGGGCCCTCTAGATGCATGCTCGAGCKGCCGCCAGTGTGATGGATATCTGCAGAATTCGCCCTTGGTGCCTCTCAGACAATCAGTGTATCATTGAGCGGATTCAGTGGTATCATTGAAGGGCGAATTCCAGCACACTGGCGGC	Expression vector pVG186_y1-w2, complete sequence	MN551088.1
					Expression vector pVG303_nanos-Cas9, complete sequence	MN551087.1
					Expression vector pVG312_vasa-DD2-Cas9, complete sequence	MN551086.1
					Expression vector pVG182, complete sequence	MN551085.1
					Neurospora cloning vector pTH1112.8, complete sequence	JF749201.1

## Sheet: Phascolarctobacterium_High
Supplementary Table S7. Bacterial identification results of each genus by BLAST test
Phascolractobacterium sp. High Top 5 BLAST Results
No.	Sample	Name	Colony no.	Input sequence	Description	Accession
1	Candidate 94 (Ct: 14.36)	Pha_Ma_01	1	CGCCAGTGTGATGGATATCTGCAGAATTCGCCCTTCAGTCAAAGGAATCGGTTTAGTACCGGAACCGACAAAGCCGGTCACACCCGGTGTATTACGCACAGCATACCAAGAGCGATCATTTACAATCATCTCTACAAGCACATAACCAGGAAAAGGGCGAATTCCAGCACACTGGCGGCCGTTACTAGTGGATCCGAGCTCGGTACCAAGCTTGGCGTAATCATGGTCATAGCTGTTTCCTGTGTGAAA	Phascolarctobacterium faecium isolate Phascolarctobacterium succinatutens 82G5 genome assembly, chromosome: 1	LR215982.1
					Phascolarctobacterium faecium JCM 30894 DNA, complete genome	AP019004.1
					Phascolarctobacterium faecium strain G104 chromosome, complete genome	CP061002.1
					E. coli-T. kodakarensis shuttle vector pTNTrpE, complete sequence	MG920814.1
					E. coli-T. kodakarensis shuttle vector pTNAg, complete sequence	MG920813.1
			2	CGCCAGTGTGATGGATATCTGCAGAATTCGCCCTTCAGTCAAAGGAATCGGTTTAGTACCGGAACCGACAAAGCCGGTCACACCCGGTGTATTACGCACAGCATACCAAGAGCGATCATTTACAATCATCTCTACAAGCACATAACCAGGAAAAGGGCGAATTCCAGCACACTGGCGGCCGTTACTAGTGGATCCGAGCTCGGTACCAAGCTTGGCGTAATCATGGTCATAGCTGTTTCCTGTGTGAAA	Phascolarctobacterium faecium isolate Phascolarctobacterium succinatutens 82G5 genome assembly, chromosome: 1	LR215982.1
					Phascolarctobacterium faecium JCM 30894 DNA, complete genome	AP019004.1
					Phascolarctobacterium faecium strain G104 chromosome, complete genome	CP061002.1
					E. coli-T. kodakarensis shuttle vector pTNTrpE, complete sequence	MG920814.1
					E. coli-T. kodakarensis shuttle vector pTNAg, complete sequence	MG920813.1
			3	CGCCAGTGTGATGGATATCTGCAGAATTCGCCCTTCAGTCAAAGGAATCGGTTTAGTACCGGAACCGACAAAGCCGGTCACACCCGGTGTATTACGCACAGCATACCAAGAGCGATCATTTACAACCATCTCTACAAGCACATAACCAGGAAAAGGGCGAATTCCAGCACACTGGCGGCCGTTACTAGTGGATCCGAGCTCGGTACCAAGCTTGGCGTAATCATGGTCATAGCTGTTTCCTGTGTGAAA	Phascolarctobacterium faecium isolate Phascolarctobacterium succinatutens 82G5 genome assembly, chromosome: 1	LR215982.1
					Phascolarctobacterium faecium JCM 30894 DNA, complete genome	AP019004.1
					Phascolarctobacterium faecium strain G104 chromosome, complete genome	CP061002.1
					E. coli-T. kodakarensis shuttle vector pTNTrpE, complete sequence	MG920814.1
					E. coli-T. kodakarensis shuttle vector pTNAg, complete sequence	MG920813.1
			4	CGCCAGTGTGATGGATATCTGCAGAATTCGCCCTTCAGTCAAAGGAATCGGTTTAGTACCGAACCGACAAAGCCGGTCACACCCGGTGTATTACGCACAGCATACCAAGAGCGATCATTTACAATCATCTCTACAAGCACATAACCAGGAAAAGGGCGAATTCCAGCACACTGGCGGCCGTTACTAGTGGATCCGAGCTCGGTACCAAGCTTGGCGTAATCATGGTCATAGCTGTTTCCTGTGTGAAA	Phascolarctobacterium faecium isolate Phascolarctobacterium succinatutens 82G5 genome assembly, chromosome: 1	LR215982.1
					Phascolarctobacterium faecium JCM 30894 DNA, complete genome	AP019004.1
					Phascolarctobacterium faecium strain G104 chromosome, complete genome	CP061002.1
					E. coli-T. kodakarensis shuttle vector pTNTrpE, complete sequence	MG920814.1
					E. coli-T. kodakarensis shuttle vector pTNAg, complete sequence	MG920813.1
			5	CGCCAGTGTGATGGATATCTGCAGAATTCGCCCTTCAGTCAAAGGAATCGGTTTAGTACCGGAACCGACAAAGCCGGTCACACCCGGTGTATTACGCACAGCATACCAAGAGCGATCATTTACAATCATCTCTACAAGCACATAACCAGGAAAAGGGCGAATTCCAGCACACTGGCGGCCGTTACTAGTGGATCCGAGCTCGGTACCAAGCTTGGCGTAATCATGGTCATAGCTGTTTCCTGTGTGAAA	Phascolarctobacterium faecium isolate Phascolarctobacterium succinatutens 82G5 genome assembly, chromosome: 1	LR215982.1
					Phascolarctobacterium faecium JCM 30894 DNA, complete genome	AP019004.1
					Phascolarctobacterium faecium strain G104 chromosome, complete genome	CP061002.1
					E. coli-T. kodakarensis shuttle vector pTNTrpE, complete sequence	MG920814.1
					E. coli-T. kodakarensis shuttle vector pTNAg, complete sequence	MG920813.1
2	Candidate 32 (Ct: 14.61)	Pha_Ma_02	1	CGCCAGTGTGATGGATATCTGCAGAATTCGCCCTTCAGTCAAAGGAATCGGTTTAGTACCGGAACCGACAAAGCCGGTCACACCCGGTGTATTACGCACAGCATACCAAGAGCGATCATTTACAATCATCTCTACAAGCACATAACCAGGAAAAGGGCGAATTCCAGCACACTGGCGGCCGTTACTAGTGGATCCGAGCTCGGTACCAAGCTTGGCGTAATCATGGTCATAGCTGTTTCCTGTGTGAAA	Phascolarctobacterium faecium isolate Phascolarctobacterium succinatutens 82G5 genome assembly, chromosome: 1	LR215982.1
					Phascolarctobacterium faecium JCM 30894 DNA, complete genome	AP019004.1
					Phascolarctobacterium faecium strain G104 chromosome, complete genome	CP061002.1
					E. coli-T. kodakarensis shuttle vector pTNTrpE, complete sequence	MG920814.1
					E. coli-T. kodakarensis shuttle vector pTNAg, complete sequence	MG920813.1
			2	CGCCAGTGTGATGGATATCTGCAGAATTCGCCCTTCAGTCAAAGGAATCGGTTTAGTACCGGAACCGACAAAGCCGGTCACACCCGGTGTATTACGCACAGCATACCAAGAGCGATCATTTACAATCATCTCTACAAGCACATAACCAGGAAAAGGGCGAATTCCAGCACACTGGCGGCCGTTACTAGTGGATCCGAGCTCGGTACCAAGCTTGGCGTAATCATGGTCATAGCTGTTTCCTGTGTGAAA	Phascolarctobacterium faecium isolate Phascolarctobacterium succinatutens 82G5 genome assembly, chromosome: 1	LR215982.1
					Phascolarctobacterium faecium JCM 30894 DNA, complete genome	AP019004.1
					Phascolarctobacterium faecium strain G104 chromosome, complete genome	CP061002.1
					E. coli-T. kodakarensis shuttle vector pTNTrpE, complete sequence	MG920814.1
					E. coli-T. kodakarensis shuttle vector pTNAg, complete sequence	MG920813.1
			3	CGCCAGTGTGATGGATATCTGCAGAATTCGCCCTTCAGTCAAAGGAATCGGTTTAGTACCGGAACCGACAAAGCCGGTCACACCCGGTGTATTACGCACAGCATACCAAGAGCGATCATTTACAATCATCTCTACAAGCACATAACCAGGAAAAGGGCGAATTCCAGCACACTGGCGGCCGTTACTAGTGGATCCGAGCTCGGTACCAAGCTTGGCGTAATCATGGTCATAGCTGTTTCCTGTGTGAAA	Phascolarctobacterium faecium isolate Phascolarctobacterium succinatutens 82G5 genome assembly, chromosome: 1	LR215982.1
					Phascolarctobacterium faecium JCM 30894 DNA, complete genome	AP019004.1
					Phascolarctobacterium faecium strain G104 chromosome, complete genome	CP061002.1
					E. coli-T. kodakarensis shuttle vector pTNTrpE, complete sequence	MG920814.1
					E. coli-T. kodakarensis shuttle vector pTNAg, complete sequence	MG920813.1
			4	CGCCAGTGTGATGGATATCTGCAGAATTCGCCCTTCAGTCAAAGGAATCGGTTTAGTACCGGAACCGACAAAGCCGGTCACACCCGGTGTATTACGCACAGCATACCAAGAGCGATCATTTACAATCATCTCTACAAGCACATAACCAGGAAAAGGGCGAATTCCAGCACACTGGCGGCCGTTACTAGTGGATCCGAGCTCGGTACCAAGCTTGGCGTAATCATGGTCATAGCTGTTTCCTGTGTGAAA	Phascolarctobacterium faecium isolate Phascolarctobacterium succinatutens 82G5 genome assembly, chromosome: 1	LR215982.1
					Phascolarctobacterium faecium JCM 30894 DNA, complete genome	AP019004.1
					Phascolarctobacterium faecium strain G104 chromosome, complete genome	CP061002.1
					E. coli-T. kodakarensis shuttle vector pTNTrpE, complete sequence	MG920814.1
					E. coli-T. kodakarensis shuttle vector pTNAg, complete sequence	MG920813.1
			5	CGCCAGTGTGATGGATATCTGCAGAATTCGCCCTTCAGTCAAAGGAATCGGTTTAGTACCGGAACCGACAAAGCCGGTCACACCCGGTGTATTACGCACAGCATACCAAGAGCGATCATTTACAATCATCTCTACAAGCACATAACCAGGAAAAGGGCGAATTCCAGCACACTGGCGGCCGTTACTAGTGGATCCGAGCTCGGTACCAAGCTTGGCGTAATCATGGTCATAGCTGTTTCCTGTGTGAAA	Phascolarctobacterium faecium isolate Phascolarctobacterium succinatutens 82G5 genome assembly, chromosome: 1	LR215982.1
					Phascolarctobacterium faecium JCM 30894 DNA, complete genome	AP019004.1
					Phascolarctobacterium faecium strain G104 chromosome, complete genome	CP061002.1
					E. coli-T. kodakarensis shuttle vector pTNTrpE, complete sequence	MG920814.1
					E. coli-T. kodakarensis shuttle vector pTNAg, complete sequence	MG920813.1
3	Candidate 6 (Ct: 14.67)	Pha_Ma_03	1	CGCCAGTGTGATGGATATCTGCAGAATTCGCCCTTTTCCTGGTTATGTGCTTGTAGAGATGATTGTAAATGATCGCTCTTGGTATGCTATGCGTAATACACCGGGTGTGACCGGCTTTGTCGGTTCCGGTACTAAACCGATTCCTTTGACTGAAGGGCGAATTCCAGCACACTGGCGGCCGTTACTAGTGGATCCGAGCTCGGTACCAAGCTTGGCGTAATCATGGTCATAGCTGTTTCCTGTGTGAAATTGTTATCCGCA	Phascolarctobacterium faecium isolate Phascolarctobacterium succinatutens 82G5 genome assembly, chromosome: 1	LR215982.1
					Phascolarctobacterium faecium JCM 30894 DNA, complete genome	AP019004.1
					Phascolarctobacterium faecium strain G104 chromosome, complete genome	CP061002.1
					E. coli-T. kodakarensis shuttle vector pTNTrpE, complete sequence	CP046955.1
					E. coli-T. kodakarensis shuttle vector pTNAg, complete sequence	LK054403.1
			2	CGCCAGTGTGATGGATATCTGCAGAATTCGCCCTTCAGTCAAAGGAATCGGTTTAGTACCGGAACCGACAAAGCCGGTCACACCCGGTGTATTACGCACAGCATACCAAGAGCGATCATTTACAATCATCTCTACAAGCACATAACCAGGAAAAGGGCGAATTCCAGCACACTGGCGGCCGTTACTAGTGGATCCGAGCTCGGTACCAAGCTTGGCGTAATCATGGTCATAGCTGTTTCCTGTGTGAAATGGTTATCCGCA	Phascolarctobacterium faecium isolate Phascolarctobacterium succinatutens 82G5 genome assembly, chromosome: 1	LR215982.1
					Phascolarctobacterium faecium JCM 30894 DNA, complete genome	AP019004.1
					Phascolarctobacterium faecium strain G104 chromosome, complete genome	CP061002.1
					E. coli-T. kodakarensis shuttle vector pTNTrpE, complete sequence	MG920814.1
					E. coli-T. kodakarensis shuttle vector pTNAg, complete sequence	MG920813.1
			3	CGCCAGTGTGATGGATATCTGCAGMATTCGCCCTTCAGTCAAAGGAATCGGTTTAGTACCGGAACCGACAAAGCCGGTCACACCCGGTGTATTACGCACAGCATACCAAGAGCGATCATTTACAATCATCTCTACAAGCACATAACCAGGAAAAGGGCGAATTCCAGCACACTGGCGGCCGTTACTAGTGGATCCGAGCTCGGTACCAAGCTTGGCGTAATCATGGTCATAGCTGTTTCCTGTGTGAAA	Phascolarctobacterium faecium isolate Phascolarctobacterium succinatutens 82G5 genome assembly, chromosome: 1	LR215982.1
					Phascolarctobacterium faecium JCM 30894 DNA, complete genome	AP019004.1
					Phascolarctobacterium faecium strain G104 chromosome, complete genome	CP061002.1
					E. coli-T. kodakarensis shuttle vector pTNTrpE, complete sequence	MG920814.1
					E. coli-T. kodakarensis shuttle vector pTNAg, complete sequence	MG920813.1
			4	CGCCAGTGTGATGGATATCTGCAGAATTCGCCCTTCAGTCAAAGGAATCGGTTTAGTACCGGAACCGACAAAGCCGGTCACACCCGGTGTATTACGCACAGCATACCAAGAGCGATCATTTACAATCATCTCTACAAGCACATAACCAGGAAAAGGGCGAATTCCAGCACACTGGCGGCCGTTACTAGTGGATCCGAGCTCGGTACCAAGCTTGGCGTAATCATGGTCATAGCTGTTTCCTGTGTGAAA	Phascolarctobacterium faecium isolate Phascolarctobacterium succinatutens 82G5 genome assembly, chromosome: 1	LR215982.1
					Phascolarctobacterium faecium JCM 30894 DNA, complete genome	AP019004.1
					Phascolarctobacterium faecium strain G104 chromosome, complete genome	CP061002.1
					E. coli-T. kodakarensis shuttle vector pTNTrpE, complete sequence	MG920814.1
					E. coli-T. kodakarensis shuttle vector pTNAg, complete sequence	MG920813.1
			5	CGCCAGTGTGATGGATATCTGCAGAATTCGCCCTTCAGTCAAAGGAATCGGTTTAGTACCGGAACCGACAAAGCCGGTCACACCCGGTGTATTACGCACAGCATACCAAGAGCGATCATTTACAATCATCTCTACAAGCACATAACCAGGAAAAGGGCGAATTCCAGCACACTGGCGGCCGTTACTAGTGGATCCGAGCTCGGTACCAAGCTTGGCGTAATCATGGTCATAGCTGTTTCCTGTGTGAAA	Phascolarctobacterium faecium isolate Phascolarctobacterium succinatutens 82G5 genome assembly, chromosome: 1	LR215982.1
					Phascolarctobacterium faecium JCM 30894 DNA, complete genome	AP019004.1
					Phascolarctobacterium faecium strain G104 chromosome, complete genome	CP061002.1
					E. coli-T. kodakarensis shuttle vector pTNTrpE, complete sequence	MG920814.1
					E. coli-T. kodakarensis shuttle vector pTNAg, complete sequence	MG920813.1
4	Candidate 74 (Ct: 15.00)	Pha_Ma_04	1	CGCCAGTGTGATGGATATCTGCAGAATTCGCCCTTCAGTCAAAGGAATCGGTTTAGTACCGGAACCGACAAAGCCGGTCACACCCGGTGTATTACGCACAGCATACCAAGAGCGATCATTTACAATCATCTCTACAAGCACATAACCAGGAAAAGGGCGAATTCCAGCACACTGGCGGCCGTTACTAGTGGATCCGAGCTCGGTACCAAGCTTGGCGTAATCATGGTCATAGCTGTTTCCTGTGTGAAA	Phascolarctobacterium faecium isolate Phascolarctobacterium succinatutens 82G5 genome assembly, chromosome: 1	LR215982.1
					Phascolarctobacterium faecium JCM 30894 DNA, complete genome	AP019004.1
					Phascolarctobacterium faecium strain G104 chromosome, complete genome	CP061002.1
					E. coli-T. kodakarensis shuttle vector pTNTrpE, complete sequence	MG920814.1
					E. coli-T. kodakarensis shuttle vector pTNAg, complete sequence	MG920813.1
			2	CGCCAGTGTGATGGATATCTGCAGAATTCGCCCTTCAGTCAAAGGAATCGGTTTAGTACCGGAACCGACAAAGCCGGTCACACCCGGTGTATTACGCACAGCATACCAAGAGCGATCATTTACAATCATCTCTACAAGCACATAACCAGGAAAAGGGCGAATTCCAGCACACTGGCGGCCGTTACTAGTGGATCCGAGCTCGGTACCAAGCTTGGCGTAATCATGGTCATAGCTGTTTCCTGTGTGAAA	Phascolarctobacterium faecium isolate Phascolarctobacterium succinatutens 82G5 genome assembly, chromosome: 1	LR215982.1
					Phascolarctobacterium faecium JCM 30894 DNA, complete genome	AP019004.1
					Phascolarctobacterium faecium strain G104 chromosome, complete genome	CP061002.1
					E. coli-T. kodakarensis shuttle vector pTNTrpE, complete sequence	MG920814.1
					E. coli-T. kodakarensis shuttle vector pTNAg, complete sequence	MG920813.1
			3	CGCCAGTGTGATGGATATCTGCAGAATTCGCCCTTCAGTCAAAGGAATCGGTTTAGTACCGGAACCGACAAAGCCGGTCACACCCGGTGTATTACGCACAGCATACCAAGAGCGATCATTTACAATCATCTCTACAAGCACATAACCAGGAAAAGGGCGAATTCCAGCACACTGGCGGCCGTTACTAGTGGATCCGAGCTCGGTACCAAGCTTGGCGTAATCATGGTCATAGCTGTTTCCTGTGTGAAA	Phascolarctobacterium faecium isolate Phascolarctobacterium succinatutens 82G5 genome assembly, chromosome: 1	LR215982.1
					Phascolarctobacterium faecium JCM 30894 DNA, complete genome	AP019004.1
					Phascolarctobacterium faecium strain G104 chromosome, complete genome	CP061002.1
					E. coli-T. kodakarensis shuttle vector pTNTrpE, complete sequence	MG920814.1
					E. coli-T. kodakarensis shuttle vector pTNAg, complete sequence	MG920813.1
			4	CGCCAGTGTGATGGATATCTGCAGAATTCGCCCTTCAGTCAAAGGAATCGGTTTAGTACCGGAACCGACAAAGCCGGTCACACCCGGTGTATTACGCACAGCATACCAAGAGCGATCATTTACAATCATCTCTACAAGCACATAACCAGGAAAAGGGCGAATTCCAGCACACTGGCGGCCGTTACTAGTGGATCCGAGCTCGGTACCAAGCTTGGCGTAATCATGGTCATAGCTGTTTCCTGTGTGAAA	Phascolarctobacterium faecium isolate Phascolarctobacterium succinatutens 82G5 genome assembly, chromosome: 1	LR215982.1
					Phascolarctobacterium faecium JCM 30894 DNA, complete genome	AP019004.1
					Phascolarctobacterium faecium strain G104 chromosome, complete genome	CP061002.1
					E. coli-T. kodakarensis shuttle vector pTNTrpE, complete sequence	MG920814.1
					E. coli-T. kodakarensis shuttle vector pTNAg, complete sequence	MG920813.1
			5	CGCCAGTGTGATGGATATCTGCAGAATTCGCCCTTCAGTCAAAGGAATCGGTTTAGTACCGGAACCGACAAAGCCGGTCACACCCGGTGTATTACGCACAGCATACCAAGAGCGATCATTTACAATCATCTCTACAAGCACATAACCAGGAAAAGGGCGAATTCCAGCACACTGGCGGCCGTTACTAGTGGATCCGAGCTCGGTACCAAGCTTGGCGTAATCATGGTCATAGCTGTTTCCTGTGTGAAA	Phascolarctobacterium faecium isolate Phascolarctobacterium succinatutens 82G5 genome assembly, chromosome: 1	LR215982.1
					Phascolarctobacterium faecium JCM 30894 DNA, complete genome	AP019004.1
					Phascolarctobacterium faecium strain G104 chromosome, complete genome	CP061002.1
					E. coli-T. kodakarensis shuttle vector pTNTrpE, complete sequence	MG920814.1
					E. coli-T. kodakarensis shuttle vector pTNAg, complete sequence	MG920813.1
5	Candidate 72 (Ct: 15.04)	Pha_Ma_05	1	CGCCAGTGTGATGGATATCTGCAGAATTCGCCCTTCAGTCAAAGGAATCGGTTTAGTACCGGAACCGACAAAGCCGGTAACGCCCGGTGTATTACGCACGGCATACCAAGAGCGGTCATTTACAATCATCTCTACAAGCACATAACCAGGAAAAGGGCGAATTCCAGCACACTGGCGGCCGTTACTAGTGGATCCGAGCTCGGTACCAAGCTTGGCGTAATCATGGTCATAGCTGTTTCCTGTGTGAAA	Phascolarctobacterium faecium isolate Phascolarctobacterium succinatutens 82G5 genome assembly, chromosome: 1	LR215982.1
					Phascolarctobacterium faecium JCM 30894 DNA, complete genome	AP019004.1
					Phascolarctobacterium faecium strain G104 chromosome, complete genome	CP061002.1
					E. coli-T. kodakarensis shuttle vector pTNTrpE, complete sequence	MG920814.1
					E. coli-T. kodakarensis shuttle vector pTNAg, complete sequence	MG920813.1
			2	CGCCAGTGTGATGGATATCTGCAGAATTCGCCCTTCAGTCAAAGGAATCGGTTTAGTACCGGAACCGACAAAGCCGGTCACACCCGGTGTATTACGCACAGCATACCAAGAGCGATCATTTACAATCATCTCTACAAGCACATAACCAGGAAAAGGGCGAATTCCAGCACACTGGCGGCCGTTACTAGTGGATCCGAGCTCGGTACCAAGCTTGGCGTAATCATGGTCATAGCTGTTTCCTGTGTGAAA	Phascolarctobacterium faecium isolate Phascolarctobacterium succinatutens 82G5 genome assembly, chromosome: 1	LR215982.1
					Phascolarctobacterium faecium JCM 30894 DNA, complete genome	AP019004.1
					Phascolarctobacterium faecium strain G104 chromosome, complete genome	CP061002.1
					E. coli-T. kodakarensis shuttle vector pTNTrpE, complete sequence	MG920814.1
					E. coli-T. kodakarensis shuttle vector pTNAg, complete sequence	MG920813.1
			3	CGCCAGTGTGATGGATATCTGCAGAATTCGCCCTTCAGTCAAAGGAATCGGTTTAGTACCGGAACCGACAAAGCCGGTCACACCCGGTGTATTACGCACGGCATACCAAGAGCGGTCATTTACAATCATCTCTACAAGCACATAACCAGGAAAAGGGCGAATTCCAGCACACTGGCGGCCGTTACTAGTGGATCCGAGCTCGGTACCAAGCTTGGCGTAATCATGGTCATAGCTGTTTCCTGTGTGAAA	Phascolarctobacterium faecium isolate Phascolarctobacterium succinatutens 82G5 genome assembly, chromosome: 1	LR215982.1
					Phascolarctobacterium faecium JCM 30894 DNA, complete genome	AP019004.1
					Phascolarctobacterium faecium strain G104 chromosome, complete genome	CP061002.1
					E. coli-T. kodakarensis shuttle vector pTNTrpE, complete sequence	MG920814.1
					E. coli-T. kodakarensis shuttle vector pTNAg, complete sequence	MG920813.1
			4	CGCCAGTGTGATGGATATCTGCAGAATTCGCCCTTCAGTCAAAGGAATCGGTTTAGTACCGGAACCGACAAAGCCGGTCACACCCGGTGTATTACGCACAGCATACCAAGAGCGATCATTTACAATCATCTCTACAAGCACATAACCAGGAAAAGGGCGAATTCCAGCACACTGGCGGCCGTTACTAGTGGATCCGAGCTCGGTACCAAGCTTGGCGTAATCATGGTCATAGCTGTTTCCTGTGTGAAA	Phascolarctobacterium faecium isolate Phascolarctobacterium succinatutens 82G5 genome assembly, chromosome: 1	LR215982.1
					Phascolarctobacterium faecium JCM 30894 DNA, complete genome	AP019004.1
					Phascolarctobacterium faecium strain G104 chromosome, complete genome	CP061002.1
					E. coli-T. kodakarensis shuttle vector pTNTrpE, complete sequence	MG920814.1
					E. coli-T. kodakarensis shuttle vector pTNAg, complete sequence	MG920813.1
			5	CGCCAGTGTGATGGATATCTGCAGAATTCGCCCTTCAGTCAAAGGAATCGGTTTAGTACCGGAACCGACAAAGCCGGTCACACCCGGTGTATTACGCACAGCATACCAAGAGCGATCATTTACAATCATCTCTACAAGCACATAACCAGGAAAAGGGCGAATTCCAGCACACTGGCGGCCGTTACTAGTGGATCCGAGCTCGGTACCAAGCTTGGCGTAATCATGGTCATAGCTGTTTCCTGTGTGAAA	Phascolarctobacterium faecium isolate Phascolarctobacterium succinatutens 82G5 genome assembly, chromosome: 1	LR215982.1
					Phascolarctobacterium faecium JCM 30894 DNA, complete genome	AP019004.1
					Phascolarctobacterium faecium strain G104 chromosome, complete genome	CP061002.1
					E. coli-T. kodakarensis shuttle vector pTNTrpE, complete sequence	MG920814.1
					E. coli-T. kodakarensis shuttle vector pTNAg, complete sequence	MG920813.1

## Sheet: Phascolarctobacterium_Low
Supplementary Table S7. Bacterial identification results of each genus by BLAST test
Phascolractobacterium sp. Low Top 5 BLAST Results
No.	Sample	Name	Colony no.	Input sequence	Description	Accession
1	Candidate 57 (Ct: 38.94)	Pha_Mi_01	1	CGCCAGTGTGATGGATATCTGCAGAATTCGCCCTTCAGTCAAAGGAATCGGTTTAGTACCGGAACCGACAAAGCCGGTCACACCCGGTGTATTACGCACAGCATACCAAGAGCGATCATTTACAATCATCTCTACAAGCACATAACCAGGAAAAGGGCGAATTCCAGCACACTGGCGGCCGTTACTAGTGGATCCGAGCTCGGTACCAAGCTTGGCGTAATCATGGTCATAGCTGTTTCCTGTGTGAAA	Phascolarctobacterium faecium isolate Phascolarctobacterium succinatutens 82G5 genome assembly, chromosome: 1	LR215982.1
					Phascolarctobacterium faecium JCM 30894 DNA, complete genome	AP019004.1
					Phascolarctobacterium faecium strain G104 chromosome, complete genome	CP061002.1
					E. coli-T. kodakarensis shuttle vector pTNTrpE, complete sequence	MG920814.1
					E. coli-T. kodakarensis shuttle vector pTNAg, complete sequence	MG920813.1
			2	CGCCAGTGTGATGGATATCTGCAGAATTCGCCCTTCAGTCAAAGGAATCGGTTTAGTACCGGAACCGACAAAGCCGGTCACACCCGGTGTATTACGCACAGCATACCAAGAGCGATCATTTACAATCATCTCTACAAGCACATAACCAGGAAAAGGGCGAATTCCAGCACACTGGCGGCCGTTACTAGTGGATCCGAGCTCGGTACCAAGCTTGGCGTAATCATGGTCATAGCTGTTTCCTGTGTGAAA	Phascolarctobacterium faecium isolate Phascolarctobacterium succinatutens 82G5 genome assembly, chromosome: 1	LR215982.1
					Phascolarctobacterium faecium JCM 30894 DNA, complete genome	AP019004.1
					Phascolarctobacterium faecium strain G104 chromosome, complete genome	CP061002.1
					E. coli-T. kodakarensis shuttle vector pTNTrpE, complete sequence	MG920814.1
					E. coli-T. kodakarensis shuttle vector pTNAg, complete sequence	MG920813.1
			3	CGCCAGTGTGATGGATATCTGCAGAATTCGCCCTTCAGTCAAAGGAATCGGTTTAGTACCGGAACCGACAAAGCCGGTCACACCCGGTGTATTACGCACAGCATACCAAGAGCGATCATTTACAATCATCTCTACAAGCACATAACCAGGAAAAGGGCGAATTCCAGCACACTGGCGGCCGTTACTAGTGGATCCGAGCTCGGTACCAAGCTTGGCGTAATCATGGTCATAGCTGTTTCCTGTGTGAAA	Phascolarctobacterium faecium isolate Phascolarctobacterium succinatutens 82G5 genome assembly, chromosome: 1	LR215982.1
					Phascolarctobacterium faecium JCM 30894 DNA, complete genome	AP019004.1
					Phascolarctobacterium faecium strain G104 chromosome, complete genome	CP061002.1
					E. coli-T. kodakarensis shuttle vector pTNTrpE, complete sequence	MG920814.1
					E. coli-T. kodakarensis shuttle vector pTNAg, complete sequence	MG920813.1
			4	CGCCAGTGTGATGGATATCTGCAGAATTCGCCCTTCAGTCAAAGGAATCGGTTTAGTACCGGAACCGACAAAGCCGGTCACACCCGGTGTATTACGCACAGCATACCAAGAGCGATCATTTACAATCATCTCTACAAGCACATAACCAGGAAAAGGGCGAATTCCAGCACACTGGCGGCCGTTACTAGTGGATCCGAGCTCGGTACCAAGCTTGGCGTAATCATGGTCATAGCTGTTTCCTGTGTGAAA	Phascolarctobacterium faecium isolate Phascolarctobacterium succinatutens 82G5 genome assembly, chromosome: 1	LR215982.1
					Phascolarctobacterium faecium JCM 30894 DNA, complete genome	AP019004.1
					Phascolarctobacterium faecium strain G104 chromosome, complete genome	CP061002.1
					E. coli-T. kodakarensis shuttle vector pTNTrpE, complete sequence	MG920814.1
					E. coli-T. kodakarensis shuttle vector pTNAg, complete sequence	MG920813.1
			5	CGCCAGTGTGATGGATATCTGCAGAATTCGCCCTTCAGTCAAAGGAATCGGTTTAGTACCGGAACCGACAAAGCCGGTCACACCCGGTGTATTACGCACAGCATACCAAGAGCGATCATTTACAATCATCTCTACAAGCACATAACCAGGAAAAGGGCGAATTCCAGCACACTGGCGGCCGTTACTAGTGGATCCGAGCTCGGTACCAAGCTTGGCGTAATCATGGTCATAGCTGTTTCCTGTGTGAAA	Phascolarctobacterium faecium isolate Phascolarctobacterium succinatutens 82G5 genome assembly, chromosome: 1	LR215982.1
					Phascolarctobacterium faecium JCM 30894 DNA, complete genome	AP019004.1
					Phascolarctobacterium faecium strain G104 chromosome, complete genome	CP061002.1
					E. coli-T. kodakarensis shuttle vector pTNTrpE, complete sequence	MG920814.1
					E. coli-T. kodakarensis shuttle vector pTNAg, complete sequence	MG920813.1
2	Candidate 76 (Ct: 38.13)	Pha_Mi_02	1	CGCCAGTGTGATGGATATCTGCAGAATTCGCCCTTCAGTCAAAGGAATCGGTTTAGTACCGGAACCGACAAAGCCGGTCACACCCGGTGTATTACGCACAGCATACCAAGAGCGATCATTTACAATCATCTCTACAAGCACATAACCAGGAAAAGGGCGAATTCCAGCACACTGGCGGCCGTTACTAGTGGATCCGAGCTCGGTACCAAGCTTGGCGTAATCATGGTCATAGCTGTTTCCTGTGTGAAA	Phascolarctobacterium faecium isolate Phascolarctobacterium succinatutens 82G5 genome assembly, chromosome: 1	LR215982.1
					Phascolarctobacterium faecium JCM 30894 DNA, complete genome	AP019004.1
					Phascolarctobacterium faecium strain G104 chromosome, complete genome	CP061002.1
					E. coli-T. kodakarensis shuttle vector pTNTrpE, complete sequence	MG920814.1
					E. coli-T. kodakarensis shuttle vector pTNAg, complete sequence	MG920813.1
			2	CGCCAGTGTGATGGATATCTGCAGAATTCGCCCTTCAGTCAAAGGAATCGGTTTAGTACCGGAACCGACAAAGCCGGTCACACCCGGTGTATTACGCACAGCATACCAAGAGCGATCATTTACAATCATCTCTACAAGCACATAACCAGGAAAAGGGCGAATTCCAGCACACTGGCGGCCGTTACTAGTGGATCCGAGCTCGGTACCAAGCTTGGCGTAATCATGGTCATAGCTGTTTCCTGTGTGAAA	Phascolarctobacterium faecium isolate Phascolarctobacterium succinatutens 82G5 genome assembly, chromosome: 1	LR215982.1
					Phascolarctobacterium faecium JCM 30894 DNA, complete genome	AP019004.1
					Phascolarctobacterium faecium strain G104 chromosome, complete genome	CP061002.1
					E. coli-T. kodakarensis shuttle vector pTNTrpE, complete sequence	MG920814.1
					E. coli-T. kodakarensis shuttle vector pTNAg, complete sequence	MG920813.1
			3	CGCCAGTGTGATGGATATCTGCAGAATTCGCCCTTCAGTCAAAGGAATCGGTTTAGTACCGGAACCGACAAAGCCGGTCACACCCGGTGTATTACGCACAGCATACCAAGAGCGATCATTTACAATCATCTCTACAAGCACATAACCAGGAAAAGGGCGAATTCCAGCACACTGGCGGCCGTTACTAGTGGATCCGAGCTCGGTACCAAGCTTGGCGTAATCATGGTCATAGCTGTTTCCTGTGTGAAA	Phascolarctobacterium faecium isolate Phascolarctobacterium succinatutens 82G5 genome assembly, chromosome: 1	LR215982.1
					Phascolarctobacterium faecium JCM 30894 DNA, complete genome	AP019004.1
					Phascolarctobacterium faecium strain G104 chromosome, complete genome	CP061002.1
					E. coli-T. kodakarensis shuttle vector pTNTrpE, complete sequence	MG920814.1
					E. coli-T. kodakarensis shuttle vector pTNAg, complete sequence	MG920813.1
			4	CGCCAGTGTGATGGATATCTGCAGAATTCGCCCTTCAGTCAAAGGAATCGGTTTAGTACCGGAACCGACAAAGCCGGTCACACCCGGTGTATTACGCACAGCATACCAAGAGCGATCATTTACAATCATCTCTACAAGCACATAACCAGGAAAAGGGCGAATTCCAGCACACTGGCGGCCGTTACTAGTGGATCCGAGCTCGGTACCAAGCTTGGCGTAATCATGGTCATAGCTGTTTCCTGTGTGAAA	Phascolarctobacterium faecium isolate Phascolarctobacterium succinatutens 82G5 genome assembly, chromosome: 1	LR215982.1
					Phascolarctobacterium faecium JCM 30894 DNA, complete genome	AP019004.1
					Phascolarctobacterium faecium strain G104 chromosome, complete genome	CP061002.1
					E. coli-T. kodakarensis shuttle vector pTNTrpE, complete sequence	MG920814.1
					E. coli-T. kodakarensis shuttle vector pTNAg, complete sequence	MG920813.1
			5	CGCCAGTGTGATGGATATCTGCAGAATTCGCCCTTCAGTCAAAGGAATCGGTTTAGTACCGGAACCGACAAAGCCGGTCACACCCGGTGTATTACGCACAGCATACCAAGAGCGATCATTTACAATCATCTCTACAAGCACATAACCAGGAAAAGGGCGAATTCCAGCACACTGGCGGCCGTTACTAGTGGATCCGAGCTCGGTACCAAGCTTGGCGTAATCATGGTCATAGCTGTTTCCTGTGTGAAA	Phascolarctobacterium faecium isolate Phascolarctobacterium succinatutens 82G5 genome assembly, chromosome: 1	LR215982.1
					Phascolarctobacterium faecium JCM 30894 DNA, complete genome	AP019004.1
					Phascolarctobacterium faecium strain G104 chromosome, complete genome	CP061002.1
					E. coli-T. kodakarensis shuttle vector pTNTrpE, complete sequence	MG920814.1
					E. coli-T. kodakarensis shuttle vector pTNAg, complete sequence	MG920813.1
3	Candidate 38 (Ct: 38.06)	Pha_Mi_03	1	CGCCAGTGTGATGGATATCTGCAGAATTCGCCCTTCAGTCAAAGGAATCGGTTTAGTACCAGAACCGACAAAGCCGGTCACACCCGGTGTATTACGCACAGCATACCAAGAGCGATCATTTACAATCATCTCTACAAGCACATAACCAGGAAAAGGGCGAATTCCAGCACACTGGCGGCCGTTACTAGTGGATCCGAGCTCGGTACCAAGCTTGGCGTAATCATGGTCATAGCTGTTTCCTGTGTGAAA	Phascolarctobacterium faecium isolate Phascolarctobacterium succinatutens 82G5 genome assembly, chromosome: 1	LR215982.1
					Phascolarctobacterium faecium JCM 30894 DNA, complete genome	AP019004.1
					Phascolarctobacterium faecium strain G104 chromosome, complete genome	CP061002.1
					E. coli-T. kodakarensis shuttle vector pTNTrpE, complete sequence	MG920814.1
					E. coli-T. kodakarensis shuttle vector pTNAg, complete sequence	MG920813.1
			2	CGCCAGTGTGATGGATATCTGCAGAATTCGCCCTTCAGTCAAAGGAATCGGTTTAGTACCAGAACCGACAAAGCCGGTCACACCCGGTGTATTACGCACAGCATACCAAGAGCGATCATTTACAATCATCTCTACAAGCACATAACCAGGAAAAGGGCGAATTCCAGCACACTGGCGGCCGTTACTAGTGGATCCGAGCTCGGTACCAAGCTTGGCGTAATCATGGTCATAGCTGTTTCCTGTGTGAAA	Phascolarctobacterium faecium isolate Phascolarctobacterium succinatutens 82G5 genome assembly, chromosome: 1	LR215982.1
					Phascolarctobacterium faecium JCM 30894 DNA, complete genome	AP019004.1
					Phascolarctobacterium faecium strain G104 chromosome, complete genome	CP061002.1
					E. coli-T. kodakarensis shuttle vector pTNTrpE, complete sequence	MG920814.1
					E. coli-T. kodakarensis shuttle vector pTNAg, complete sequence	MG920813.1
			3	CGCCAGTGTGATGGATATCTGCAGAATTCGCCCTTCAGTCAAAGGAATCGGTTTAGTACCAGAACCGACAAAGCCGGTCACACCCGGTGTATTACGCACAGCATACCAAGAGCGATCATTTACAATCATCTCTACAAGCACATAACCAGGAAAAGGGCGAATTCCAGCACACTGGCGGCCGTTACTAGTGGATCCGAGCTCGGTACCAAGCTTGGCGTAATCATGGTCATAGCTGTTTCCTGTGTGAAA	Phascolarctobacterium faecium isolate Phascolarctobacterium succinatutens 82G5 genome assembly, chromosome: 1	LR215982.1
					Phascolarctobacterium faecium JCM 30894 DNA, complete genome	AP019004.1
					Phascolarctobacterium faecium strain G104 chromosome, complete genome	CP061002.1
					E. coli-T. kodakarensis shuttle vector pTNTrpE, complete sequence	MG920814.1
					E. coli-T. kodakarensis shuttle vector pTNAg, complete sequence	MG920813.1
			4	CGCCAGTGTGATGGATATCTGCAGAATTCGCCCTTCAGTCAAAGGAATCGGTTTAGTACCAGAACCGACAAAGCCGGTCACACCCGGTGTATTACGCACAGCATACCAAGAGCGATCATTTACAATCATCTCTACAAGCACATAACCAGGAAAAGGGCGAATTCCAGCACACTGGCGGCCGTTACTAGTGGATCCGAGCTCGGTACCAAGCTTGGCGTAATCATGGTCATAGCTGTTTCCTGTGTGAAA	Phascolarctobacterium faecium isolate Phascolarctobacterium succinatutens 82G5 genome assembly, chromosome: 1	LR215982.1
					Phascolarctobacterium faecium JCM 30894 DNA, complete genome	AP019004.1
					Phascolarctobacterium faecium strain G104 chromosome, complete genome	CP061002.1
					E. coli-T. kodakarensis shuttle vector pTNTrpE, complete sequence	MG920814.1
					E. coli-T. kodakarensis shuttle vector pTNAg, complete sequence	MG920813.1
			5	CGCCAGTGTGATGGATATCTGCAGAATTCGCCCTTCAGTCAAAGGAATCGGTTTAGTACCAGAACCGACAAAGCCGGTCACACCCGGTGTATTACGCACAGCATACCAAGAGCGATCATTTACAATCATCTCTACAAGCACATAACCAGGAAAAGGGCGAATTCCAGCACACTGGCGGCCGTTACTAGTGGATCCGAGCTCGGTACCAAGCTTGGCGTAATCATGGTCATAGCTGTTTCCTGTGTGAAA	Phascolarctobacterium faecium isolate Phascolarctobacterium succinatutens 82G5 genome assembly, chromosome: 1	LR215982.1
					Phascolarctobacterium faecium JCM 30894 DNA, complete genome	AP019004.1
					Phascolarctobacterium faecium strain G104 chromosome, complete genome	CP061002.1
					E. coli-T. kodakarensis shuttle vector pTNTrpE, complete sequence	MG920814.1
					E. coli-T. kodakarensis shuttle vector pTNAg, complete sequence	MG920813.1
4	Candidate 100 (Ct: 36.79)	Pha_Mi_04	1	CGCCAGTGTGATGGATATCTGCAGAATTCGCCCTTCAGTCAAAGGAATCGGTTTAGTACCGGAACCGACAAAGCCGGTCACACCCGGTGTATTACGCACAGCATACCAAGAGCGATCATTTACAATCATCTCTACAAGCACATAACCAGGAAAAGGGCGAATTCCAGCACACTGGCGGCCGTTACTAGTGGATCCGAGCTCGGTACCAAGCTTGGCGTAATCATGGTCATAGCTGTTTCCTGTGTGAAA	Phascolarctobacterium faecium isolate Phascolarctobacterium succinatutens 82G5 genome assembly, chromosome: 1	LR215982.1
					Phascolarctobacterium faecium JCM 30894 DNA, complete genome	AP019004.1
					Phascolarctobacterium faecium strain G104 chromosome, complete genome	CP061002.1
					E. coli-T. kodakarensis shuttle vector pTNTrpE, complete sequence	MG920814.1
					E. coli-T. kodakarensis shuttle vector pTNAg, complete sequence	MG920813.1
			2	CGCCAGTGTGATGGATATCTGCAGAATTCGCCCTTCAGTCAAAGGAATCGGTTTAGTACCGGAACCGACAAAGCCGGTCACACCCGGTGTATTACGCACAGCATACCAAGAGCGATCATTTACAATCATCTCTACAAGCACATAACCAGGAAAAGGGCGAATTCCAGCACACTGGCGGCCGTTACTAGTGGATCCGAGCTCGGTACCAAGCTTGGCGTAATCATGGTCATAGCTGTTTCCTGTGTGAAA	Phascolarctobacterium faecium isolate Phascolarctobacterium succinatutens 82G5 genome assembly, chromosome: 1	LR215982.1
					Phascolarctobacterium faecium JCM 30894 DNA, complete genome	AP019004.1
					Phascolarctobacterium faecium strain G104 chromosome, complete genome	CP061002.1
					E. coli-T. kodakarensis shuttle vector pTNTrpE, complete sequence	MG920814.1
					E. coli-T. kodakarensis shuttle vector pTNAg, complete sequence	MG920813.1
			3	CGCCAGTGTGATGGATATCTGCAGAATTCGCCCTTCAGTCAAAGGAATCGGTTTAGTACCGGAACCGACAAAGCCGGTCACACCCGGTGTATTACGCACAGCATACCAAGAGCGATCATTTACAATCATCTCTACAAGCACATAACCAGGAAAAGGGCGAATTCCAGCACACTGGCGGCCGTTACTAGTGGATCCGAGCTCGGTACCAAGCTTGGCGTAATCATGGTCATAGCTGTTTCCTGTGTGAAA	Phascolarctobacterium faecium isolate Phascolarctobacterium succinatutens 82G5 genome assembly, chromosome: 1	LR215982.1
					Phascolarctobacterium faecium JCM 30894 DNA, complete genome	AP019004.1
					Phascolarctobacterium faecium strain G104 chromosome, complete genome	CP061002.1
					E. coli-T. kodakarensis shuttle vector pTNTrpE, complete sequence	MG920814.1
					E. coli-T. kodakarensis shuttle vector pTNAg, complete sequence	MG920813.1
			4	CGCCAGTGTGATGGATATCTGCAGAATTCGCCCTTCAGTCAAAGGAATCGGTTTAGTACCGGAACCGACAAAGCCGGTCACACCCGGTGTGTTACGCACAGCATACCAAGAGCGATCATTTACAATCATCTCTACAAGCACATAACCAGGAAAAGGGCGAATTCCAGCACACTGGCGGCCGTTACTAGTGGATCCGAGCTCGGTACCAAGCTTGGCGTAATCATGGTCATAGCTGTTTCCTGTGTGAA	Phascolarctobacterium faecium isolate Phascolarctobacterium succinatutens 82G5 genome assembly, chromosome: 1	LR215982.1
					Phascolarctobacterium faecium JCM 30894 DNA, complete genome	AP019004.1
					Phascolarctobacterium faecium strain G104 chromosome, complete genome	CP061002.1
					E. coli-T. kodakarensis shuttle vector pTNTrpE, complete sequence	MG920814.1
					E. coli-T. kodakarensis shuttle vector pTNAg, complete sequence	MG920813.1
			5	CGCCAGTGTGATGGATATCTGCAGAATTCGCCCTTCAGTCAAAGGAATCGGTTTAGTACCGGAACCGACAAAGCCGGTCACACCCGGTGTATTACGCACAGCATACCAAGAGCGATCATTTACAATCATCTCTACAAGCACATAACCAGGAAAAGGGCGAATTCCAGCACACTGGCGGCCGTTACTAGTGGATCCGAGCTCGGTACCAAGCTTGGCGTAATCATGGTCATAGCTGTTTCCTGTGTGAA	Phascolarctobacterium faecium isolate Phascolarctobacterium succinatutens 82G5 genome assembly, chromosome: 1	LR215982.1
					Phascolarctobacterium faecium JCM 30894 DNA, complete genome	AP019004.1
					Phascolarctobacterium faecium strain G104 chromosome, complete genome	CP061002.1
					E. coli-T. kodakarensis shuttle vector pTNTrpE, complete sequence	MG920814.1
					E. coli-T. kodakarensis shuttle vector pTNAg, complete sequence	MG920813.1
5	Candidate 58 (Ct: 36.00)	Pha_Mi_05	1	CGCCAGTGTGATGGATATCTGCAGAATTCGCCCTTCAGTCAAAGGAATCGGTTTAGTACCGGAACCGACAAAGCCGGTCACACCCGGTGTATTACGCACAGCATACCAAGAGCGATCATTTACAATCATCTCTACAAGCACATAACCAGGAAAAGGGCGAATTCCAGCACACTGGCGGCCGTTACTAGTGGATCCGAGCTCGGTACCAAGCTTGGCGTAATCATGGTCATAGCTGTTTCCTGTGTGAAA	Phascolarctobacterium faecium isolate Phascolarctobacterium succinatutens 82G5 genome assembly, chromosome: 1	LR215982.1
					Phascolarctobacterium faecium JCM 30894 DNA, complete genome	AP019004.1
					Phascolarctobacterium faecium strain G104 chromosome, complete genome	CP061002.1
					E. coli-T. kodakarensis shuttle vector pTNTrpE, complete sequence	MG920814.1
					E. coli-T. kodakarensis shuttle vector pTNAg, complete sequence	MG920813.1
			2	CGCCAGTGTGATGGATATCTGCAGAATTCGCCCTTCAGTCAAAGGAATCGGTTTAGTACCGGAACCGACAAAGCCGGTCACACCCGGTGTATTACGCACAGCATACCAAGAGCGATCATTTACAATCATCTCTACAAGCACATAACCAGGAAAAGGGCGAATTCCAGCACACTGGCGGCCGTTACTAGTGGATCCGAGCTCGGTACCAAGCTTGGCGTAATCATGGTCATAGCTGTTTCCTGTGTGAAA	Phascolarctobacterium faecium isolate Phascolarctobacterium succinatutens 82G5 genome assembly, chromosome: 1	LR215982.1
					Phascolarctobacterium faecium JCM 30894 DNA, complete genome	AP019004.1
					Phascolarctobacterium faecium strain G104 chromosome, complete genome	CP061002.1
					E. coli-T. kodakarensis shuttle vector pTNTrpE, complete sequence	MG920814.1
					E. coli-T. kodakarensis shuttle vector pTNAg, complete sequence	MG920813.1
			3	CGCCAGTGTGATGGATATCTGCAGAATTCGCCCTTCAGTCAAAGGAATCGGTTTAGTACCGGAACCGACAAAGCCGGTCACACCCGGTGTATTACGCACAGCATACCAAGAGCGATCATTTACAATCATCTCTACAAGCACATAACCAGGAAAAGGGCGAATTCCAGCACACTGGCGGCCGTTACTAGTGGATCCGAGCTCGGTACCAAGCTTGGCGTAATCATGGTCATAGCTGTTTCCTGTGTGAAA	Phascolarctobacterium faecium isolate Phascolarctobacterium succinatutens 82G5 genome assembly, chromosome: 1	LR215982.1
					Phascolarctobacterium faecium JCM 30894 DNA, complete genome	AP019004.1
					Phascolarctobacterium faecium strain G104 chromosome, complete genome	CP061002.1
					E. coli-T. kodakarensis shuttle vector pTNTrpE, complete sequence	MG920814.1
					E. coli-T. kodakarensis shuttle vector pTNAg, complete sequence	MG920813.1
			4	CGCCAGTGTGATGGATATCTGCAGAATTCGCCCTTCAGTCAAAGGAATCGGTTTAGTACCGGAACCGACAAAGCCGGTCACACCCGGTGTATTACGCACAGCATACCAGGAGCGATCATTTACAATCATCTCTACAAGCACATAACCAGGAAAAGGGCGAATTCCAGCACACTGGCGGCCGTTACTAGTGGATCCGAGCTCGGTACCAAGCTTGGCGTAATCATGGTCATAGCTGTTTCCTGTGTGAAA	Phascolarctobacterium faecium isolate Phascolarctobacterium succinatutens 82G5 genome assembly, chromosome: 1	LR215982.1
					Phascolarctobacterium faecium JCM 30894 DNA, complete genome	AP019004.1
					Phascolarctobacterium faecium strain G104 chromosome, complete genome	CP061002.1
					E. coli-T. kodakarensis shuttle vector pTNTrpE, complete sequence	MG920814.1
					E. coli-T. kodakarensis shuttle vector pTNAg, complete sequence	MG920813.1
			5	CGCCAGTGTGATGGATATCTGCAGAATTCGCCCTTCAGTCAAAGGAATCGGTTTAGTACCGGAACCGACAAAGTCGGTCACACCCGGTGTATTACGCACAGCATACCAAGAGCGATCGTTTACAATCATCTCTACAAGCACATAACCAGGAAAAGGGCGAATTCCAGCACACTGGCGGCCGTTACTAGTGGATCCGAGCTCGGTACCAAGCTTGGCGTAATCATGGTCATAGCTGTTTCCTGTGTGAAA	Phascolarctobacterium faecium isolate Phascolarctobacterium succinatutens 82G5 genome assembly, chromosome: 1	LR215982.1
					Phascolarctobacterium faecium JCM 30894 DNA, complete genome	AP019004.1
					Phascolarctobacterium faecium strain G104 chromosome, complete genome	CP061002.1
					E. coli-T. kodakarensis shuttle vector pTNTrpE, complete sequence	MG920814.1
					E. coli-T. kodakarensis shuttle vector pTNAg, complete sequence	MG920813.1

## Sheet: Roseburia_High
Supplementary Table S7. Bacterial identification results of each genus by BLAST test
Roseburia sp. High Top 5 BLAST Results
No.	Sample	Name	Colony no.	Input sequence	Description	Accession
1	Candidate 81 (Ct: 15.35)	Ros_Ma_01	1	CGCCAGTGTGATGGATATCTGCAGAATTCGCCCTTAAATAACCCGTGGTGTTACCGGATTTGTTGGTCCGGGAAGCAAGCCGGTTCCGCTTACCGATATGGAAATGAAACCTTTGGGAATCAAGAAAGAGAACATTGAAGTTGACTTTACAGAGGGAGACACAAGGGCGAATTCCAGCACACTGGCGGCCGTTACTAGTGGATCCGAGCTCGGTACCAAGCTTGGCGTAATCATGGTCATAGCTGTTTCCTGTGTGAAATGGTTATCCGCA	Roseburia intestinalis L1-82 genome assembly, chromosome: 1	LR027880.1
					Roseburia intestinalis XB6B4 draft genome	FP929050.1
					Roseburia intestinalis M50/1 draft genome	FP929049.1
					Suicide vector pMC3752, complete sequence	MN186288.1
					Uncultured prokaryote gene for 16S ribosomal RNA, partial sequence, OTU:AA7374	LC244184.1
			2	CGCCAGTGTGATGGATATCTGCAGAATTCGCCCTTGTGTCTCCCTCTGTAAAGTCAACTTCAATGTTCYCTTTCTTGATTCCCAAAGGTTTCATTTCCATATCGGTAAGCGGAACCGGCTTGCTTCCCGGACCAACAAATCCGGTAACACCACGGGTATTTAAGGGCGAATTCCAGCACACTGGCGGCCGTTACTAGTGGATCCGAGCTCGGTACCAAGCTTGGCGTAATCATGGTCATAGCTGTTTCCTGTGTGAATTGGTTATCCGCAA	Roseburia intestinalis L1-82 genome assembly, chromosome: 1	LR027880.1
					Roseburia intestinalis XB6B4 draft genome	FP929050.1
					Roseburia intestinalis M50/1 draft genome	FP929049.1
					Suicide vector pMC3752, complete sequence	MN186288.1
					Cloning vector pHR-res-Ech_0379-Amtr-mCh-Gent, complete sequence	MF068807.1
			3	CGCCAGTGTGATGGATATCTGCAGAATTCGCCCTTGTGTCTCCCTCTGTAAAGTCAACTTCAATGTTCTCTTTCTTGATTCCCAAAGGTTTCATTTCCATATTGGTAAGCGGAACCGGCTTGCTTCCCGACCAACAAATCCGGTAACACCACGGGTATTTAAGGGCGAATTCCAGCACACTGGCGGCCGTTACTAGTGGATCCGAGCTCGGTACCAAGCTTGGCGTAATCATGGTCATAGCTGTTTCCTGTGTGAATTGGTTATCCGCA	Roseburia intestinalis L1-82 genome assembly, chromosome: 1	LR027880.1
					Roseburia intestinalis XB6B4 draft genome	FP929050.1
					Roseburia intestinalis M50/1 draft genome	FP929049.1
					Suicide vector pMC3752, complete sequence	MN186288.1
					Cloning vector pHR-res-Ech_0379-Amtr-mCh-Gent, complete sequence	MF068807.1
			4	CGCCAGTGTGATGGATATCTGCAGAATTCGCCCTTGTGTCTCCCTCTGTAAAGTCAACTTCAATGTTCTCTTTCTTGATTCCCAAAGGTTTCATTTCCATATCGGTAAGCGGAACCGGCTTGCTTCCCGGACCAACAAATCCGGTAACACCACGGGTATTTAAGGGCGAATTCCAGCACACTGGCGGCCGTTACTAGTGGATCCGAGCTCGGTACCAAGCTTGGCGTAATCATGGTCATAGCTGTTTCCTGTGTGAATTGGTTATCCGCA	Roseburia intestinalis L1-82 genome assembly, chromosome: 1	LR027880.1
					Roseburia intestinalis XB6B4 draft genome	FP929050.1
					Roseburia intestinalis M50/1 draft genome	FP929049.1
					Suicide vector pMC3752, complete sequence	MN186288.1
					Cloning vector pHR-res-Ech_0379-Amtr-mCh-Gent, complete sequence	MF068807.1
			5	CGCCAGTGTGATGGATATCTGCAGAATTCGCCCTTGTGTCTCCCTCTGTAAAGTCAACTTCAATGTTCTCTTTCTTGATTCCCAAAGGTTTCATTTCCATATCGGTAAGCGGAACCGGCTTGCTTCCCGGACCAACAAATCCGGTAACACCACGGGTATTTAAGGGCGAATTCCAGCACACTGGCGGCCGTTACTAGTGGATCCGAGCTCGGTACCAAGCTTGGCGTAATCATGGTCATAGCTGTTTCCTGTGTGAAATTKGTTATCCGCAA	Roseburia intestinalis L1-82 genome assembly, chromosome: 1	LR027880.1
					Roseburia intestinalis XB6B4 draft genome	FP929050.1
					Roseburia intestinalis M50/1 draft genome	FP929049.1
					Suicide vector pMC3752, complete sequence	MN186288.1
					Cloning vector pHR-res-Ech_0379-Amtr-mCh-Gent, complete sequence	MF068807.1
2	Candidate 60 (Ct: 15.79)	Ros_Ma_02	1	CGGCCGCCAGTGTGATGGATAYCTGCAGAATTCGCCCTTAAATAACCCGTGGTGTTACCGGATTCGTTGGTCCGGGAAGCAAGCCGGTACCGCTTACCGATAYGGAAATGAAACCATTAGGTATCAAGACYGAGAACGTTGAGGTTGACTTTACAGAGGGAGACACAAGGGCGAATTCCAGCACACTGGCGGCCGTTACTAGTGGATCCGAGCTCGGTACCAAGCTTGGCGTAATCATGGTCATAGCTGTTTCCTGT	Roseburia intestinalis L1-82 genome assembly, chromosome: 1	LR027880.1
					Roseburia intestinalis XB6B4 draft genome	FP929050.1
					Roseburia intestinalis M50/1 draft genome	FP929049.1
					Suicide vector pMC3752, complete sequence	MN186288.1
					Uncultured prokaryote gene for 16S ribosomal RNA, partial sequence, OTU:AA7374	LC244184.1
			2	CGCCAGTGTGATGGATATCTGCAGAATTCGCCCTTGTGTCTCCCTCTGTAAAGTCAACCTCAACGTTCTCAGTCTTGATACCTAATGGTTTCATTTCCATATCGGTAAGCGGTACCGGCTTGCTTCCCGGACCAACGAATCCGGTAACACCACGGGTATTTAAGGGCGAATTCCAGCACACTGGCGGCCGTTACTAGTGGATCCGAGCTCGGTACCAAGCTTGGCGTAATCATGGTCATAGCTGTTTCCTGTGTGAAA	Roseburia intestinalis L1-82 genome assembly, chromosome: 1	LR027880.1
					Roseburia intestinalis XB6B4 draft genome	FP929050.1
					Roseburia intestinalis M50/1 draft genome	FP929049.1
					Suicide vector pMC3752, complete sequence	MN186288.1
					Suicide vector pMC3752, complete sequence	MN186288.1
			3	CGCCAGTGTGATGGAYTWCTMGCAGAATTCGCCCTTGTGTCTCCCTCTGTAAAGTCAACCTCAACGTTCTCAGTCTTGATACCTAATGGTTTCAYTTCTATATCGGTAAGCGGTACCGGCTTGCTTCCCGGACCAACGAATCCGGTAACACCACGGGTATTTAAGGGCGAATTCCAGCACACTGGCGGCCGTTACTAGTGGATCCGAGCTCGGTACCAAGCTTGGCGTAATCATGGTCAT	Roseburia intestinalis L1-82 genome assembly, chromosome: 1	LR027880.1
					Roseburia intestinalis XB6B4 draft genome	FP929050.1
					Roseburia intestinalis M50/1 draft genome	FP929049.1
					Roseburia hominis isolate MGYG-HGUT-02517 genome assembly, chromosome: 1	LR699011.1
					Suicide vector pMC3752, complete sequence	MN186288.1
			4	CGCCAGTGTGATGGATATCTGCAGAATTCGCCCTTGTGTCTCCCTCTGTAAAGTCAACCTCAACGTTCTCAGTCTTGATACCTAATGGTTTCATTTCCATATCGGTAAGCGGTACCGGCTTGCTTCCCGGACCAACGAATCCGGTAACACCACGGGTATTTAAGGGCGAATTCCAGCACACTGGCGGCCGTTACTAGTGGATCCGAGCTCGGTACCAAGCTTGGCGTAATCATGGTCATAGCTGTTTCCTGTGTGAA	Roseburia intestinalis L1-82 genome assembly, chromosome: 1	LR027880.1
					Roseburia intestinalis XB6B4 draft genome	FP929050.1
					Roseburia intestinalis M50/1 draft genome	FP929049.1
					Suicide vector pMC3752, complete sequence	MN186288.1
					Suicide vector pMC3752, complete sequence	MN186288.1
			5	CGCCAGTGTGATGGATATCTGCAGAATTCGCCCTTGTGTCTCCCTCTGTAAAGTCAACCTCAACGTTCTCAGTCTTGATACCTAATGGTTTCATTTCCATATCGGTAAGCGGTACCGGCTTGCTTCCCGGACCAACGAATCCGGTAACACCACGGGTATTTAAGGGCGAATTCCAGCACACTGGCGGCCGTTACTAGTGGATCCGAGCTCGGTACCAAGCTTGGCGTAATCATGGTCATAGCTGTTTCCTGTGTGAAA	Roseburia intestinalis L1-82 genome assembly, chromosome: 1	LR027880.1
					Roseburia intestinalis XB6B4 draft genome	FP929050.1
					Roseburia intestinalis M50/1 draft genome	FP929049.1
					Suicide vector pMC3752, complete sequence	MN186288.1
					Suicide vector pMC3752, complete sequence	MN186288.1
3	Candidate 59 (Ct: 16.20)	Ros_Ma_03	1	CGCCAGTGTGATGGATATCTGCAGAATTCGCCCTTGTGTCTCCCTCTGTAAAGTCAACCTCAATGTTCTCTGTCTTGATCCCAAGCGGTCTCATTTCCATATCGGTAAGCGGTACCGGCTTCGAYCCCGGACCAACAAATCCGGTAACACCACGGGTATTTAAGGGCGAATTCCAGCACACTGGCGGCCGTTACTAGTGGATCCGAGCTCGGTACCAAGCTTGGCGTAATCATGGTCATAGCTGTTTCCTGTGTGAAWWGGGTTATCCGCAA	Roseburia hominis isolate MGYG-HGUT-02517 genome assembly, chromosome: 1	LR699011.1
					Suicide vector pMC3752, complete sequence	MN186288.1
					Cloning vector pHR-res-Ech_0379-Amtr-mCh-Gent, complete sequence	MF068807.1
					Cloning vector pHR-Ech_0379-tuf-aadA, complete sequence	MF068806.1
					Cloning vector pVG363_Aste-U6a-Swap4-gRNA, complete sequence	MW030450.1
			2	CGCCAGTGTGATGGATATCTGCAGAATTCGCCCTTGTGTCTCCCTCTGTAAAGTCAACTTCAATGTTCTCTTTCTTGATTCCCAAAGGTTTCATTTCCATATCGGTAAGCGGAACCGGCTTGCTTCCCGGACCAACAAATCCGGTAACACCACGGGTATTTAAGGGCGAATTCCAGCACACTGGCGGCCGTTACTAGTGGATCCGAGCTCGGTACCAAGCTTGGCGTAATCATGGTCATAGCTGTTTCCTGTGTGAATTGGKTTATCCGCAA	Roseburia intestinalis L1-82 genome assembly, chromosome: 1	LR027880.1
					Roseburia intestinalis XB6B4 draft genome	FP929050.1
					Roseburia intestinalis M50/1 draft genome	FP929049.1
					Suicide vector pMC3752, complete sequence	MN186288.1
					Cloning vector pHR-res-Ech_0379-Amtr-mCh-Gent, complete sequence	MF068807.1
			3	CGCCAGTGTGATGGATATCTGCAGAATTCGCCCTTGTGTCTCCCTCTGTAAAGTCAACTTCAATGTTCTCTTTCTTGATTCCCAAAGGTTTCATTTCCATATCGGTAAGCGGAACCGGCTTGCTTCCCGGACCAACAAATCCGGTAACACCACGGGTATTTAAGGGCGAATTCCAGCACACTGGCGGCCGTTACTAGTGGATCCGAGCTCGGTACCAAGCTTGGCGTAATCATGGTCATAGCTGTTTCCTGTGTGAATTKGGTTATCCGCA	Roseburia intestinalis L1-82 genome assembly, chromosome: 1	LR027880.1
					Roseburia intestinalis XB6B4 draft genome	FP929050.1
					Roseburia intestinalis M50/1 draft genome	FP929049.1
					Suicide vector pMC3752, complete sequence	MN186288.1
					Cloning vector pHR-res-Ech_0379-Amtr-mCh-Gent, complete sequence	MF068807.1
			4	CGCCAGTGTGATGGATATCTGCAGAATTCGCCCTTGTGTCTCCCTCTGTAAAGTCAACTTCAATGTTCTCTTTCTTGATTCCCAAAGGTTTCATTTCCATATCGGTAAGCGGAACCGGCTTGCTTCCCGGACCAACAAATCCGGTAACACCACGGGTATTTAAGGGCGAATTCCAGCACACTGGCGGCCGTTACTAGTGGATCCGAGCTCGGTACCAAGCTTGGCGTAATCATGGTCATAGCTGTTTCCTGTGTGAATTKGGTTATCCGCAAT	Roseburia intestinalis L1-82 genome assembly, chromosome: 1	LR027880.1
					Roseburia intestinalis XB6B4 draft genome	FP929050.1
					Roseburia intestinalis M50/1 draft genome	FP929049.1
					Suicide vector pMC3752, complete sequence	MN186288.1
					Cloning vector pHR-res-Ech_0379-Amtr-mCh-Gent, complete sequence	MF068807.1
			5	CGCCAGTGTGATGGATATCTGCAGAATTCGCCCTTGTGTCTCCCTCTGTAAAGTCAACTTCAATGTTCTCTTTCTTGATTCCCAAAGGTTTCATTTCCATATCGGTAAGCGGAACCGGCTTGCTTCCCGGACCAACAAATCCGGTAACACCACGGGTATTTAAGGGCGAATTCCAGCACACTGGCGGCCGTTACTAGTGGATCCGAGCTCGGTACCAAGCTTGGCGTAATCATGGTCATAGCTGTTTCCTGTGTGAAATTGTTATCCGCA	Roseburia intestinalis L1-82 genome assembly, chromosome: 1	LR027880.1
					Roseburia intestinalis XB6B4 draft genome	FP929050.1
					Roseburia intestinalis M50/1 draft genome	FP929049.1
					Suicide vector pMC3752, complete sequence	MN186288.1
					Cloning vector pHR-res-Ech_0379-Amtr-mCh-Gent, complete sequence	MF068807.1
4	Candidate 39 (Ct: 16.38)	Ros_Ma_04	1	CGCCAGTGTGATGGATATCTGCAGAATTCGCCCTTGTGTCTCCCTCTGTAAAGTCAACCTCAATGTTCTCTGTCTTGATCCCAAGCGGTCTCATTTCCATATCGGTAAGCGGTACCGGCTTCGATCCCGGACCAACAAATCCGGTAACACCACGGGTATTTAAGGGCGAATTCCAGCACACTGGCGGCCGTTACTAGTGGATCCGAGCTCGGTACCAAGCTTGGCGTAATCATGGTCATAGCTGTTTCCTGTGTGAAYGGGTTATCCGCAA	Roseburia hominis isolate MGYG-HGUT-02517 genome assembly, chromosome: 1	LR699011.1
					Suicide vector pMC3752, complete sequence	MN186288.1
					Cloning vector pHR-res-Ech_0379-Amtr-mCh-Gent, complete sequence	MF068807.1
					Cloning vector pHR-Ech_0379-tuf-aadA, complete sequence	MF068806.1
					Cloning vector pVG363_Aste-U6a-Swap4-gRNA, complete sequence	MW030450.1
			2	CGCCAGTGTGATGGATATCTGCAGAATTCGCCCTTGTGTCTCCCTCTGTAAAGTCAACCTCAATGTTCTCTGTCTTGATCCCAAGCGGTCTCATTTCCATATCGGTAAGCGGTACCGGCTTCGATCCCGGACCAACAAATCCGGTAACACCACGGGTATTTAAGGGCGAATTCCAGCACACTGGCGGCCGTTACTAGTGGATCCGAGCTCGGTACCAAGCTTGGCGTAATCATGGTCATAGCTGTTTCCTGTGTGAAAWGGGTTATCCGCAA	Roseburia hominis isolate MGYG-HGUT-02517 genome assembly, chromosome: 1	LR699011.1
					Suicide vector pMC3752, complete sequence	MN186288.1
					Cloning vector pHR-res-Ech_0379-Amtr-mCh-Gent, complete sequence	MF068807.1
					Cloning vector pHR-Ech_0379-tuf-aadA, complete sequence	MF068806.1
					Cloning vector pVG363_Aste-U6a-Swap4-gRNA, complete sequence	MW030450.1
			3	CGCCAGTGTGATGGATATCTGCAGAATTCGCCCTTGTGTCTCCCTCTGTAAAGTCAACCTCAATGTTCTCTGTCTTGATCCCAAGCGGTCTCATTTCCATATCGGTAAGCGGTACCGGCTTCGATCCCGGACCAACAAATCCGGTAACACCACGGGTATTTAAGGGCGAATTCCAGCACACTGGCGGCCGTTACTAGTGGATCCGAGCTCGGTACCAAGCTTGGCGTAATCATGGTCATAGCTGTTTCCTGTGTGAAATKGTTATCCGCAA	Roseburia hominis isolate MGYG-HGUT-02517 genome assembly, chromosome: 1	LR699011.1
					Suicide vector pMC3752, complete sequence	MN186288.1
					Cloning vector pHR-res-Ech_0379-Amtr-mCh-Gent, complete sequence	MF068807.1
					Cloning vector pHR-Ech_0379-tuf-aadA, complete sequence	MF068806.1
					Cloning vector pVG363_Aste-U6a-Swap4-gRNA, complete sequence	MW030450.1
			4	CGCCAGTGTGATGGATATCTGCAGAATTCGCCCTTAAAATACCCGTGGTGTTACCGGATTTGTTGGTCCGGGATCGAAGCCGGTACCGCTTACCGATATGGAAATGAGACCGCTTGGGATCAAGACAGAGAACATTGAGGTTGACTTTACAGAGGGAGACACAAGGGCGAATTCCAGCACACTGGCGGCCGTTACTAGTGGATCCGAGCTCGGTACCAAGCTTGGCGTAATCATGGTCATAGCTGTTTCCTGTGTGAAATKGTTATCCGCAA	Roseburia hominis isolate MGYG-HGUT-02517 genome assembly, chromosome: 1	LR699011.1
					Corynebacterium pseudotuberculosis strain sigB chromosome, complete genome	CP046732.1
					Uncultured prokaryote gene for 16S ribosomal RNA, partial sequence, OTU:AA7374	LC244184.1
					Suicide vector pMC3752, complete sequence	MN186288.1
					Expression vector pVMG48_truncated-R, complete sequence	MN551093.1
			5	CGCCAGTGTGATGGATATCTGCAGAATTCGCCCTTGTGTCTCCCTCTGTAAAGTCAACCTCAATGTTCTCTGTCTTGATCCCAAGCGGTCTCATTTCCATATCGGTAAGCGGTACCGGCTTCGATCCCGGACCAACAAATCCGGTAACACCACGGGTATTTAAGGGCGAATTCCAGCACACTGGCGGCCGTTACTAGTGGATCCGAGCTCGGTACCAAGCTTGGCGTAATCATGGTCATAGCTGTTTCCTGTGTGAATTGGKTTATCCGCAA	Roseburia hominis isolate MGYG-HGUT-02517 genome assembly, chromosome: 1	LR699011.1
					Suicide vector pMC3752, complete sequence	MN186288.1
					Cloning vector pHR-res-Ech_0379-Amtr-mCh-Gent, complete sequence	MF068807.1
					Cloning vector pHR-Ech_0379-tuf-aadA, complete sequence	MF068806.1
					Cloning vector pVG363_Aste-U6a-Swap4-gRNA, complete sequence	MW030450.1
5	Candidate 19 (Ct: 16.38)	Ros_Ma_05	1	CGCCAGTGTGATGGATATCTGCAGAATTCGCCCTTAAATAACCCGTGGTGTTACCGGATTTGTTGGTCCGGGAAGCAAGCCGGTTCCGCTTACCGATATGGAAATGAAACCTTTGGGAATCAAGAAAGAGAACATTGAAGTTGACTTTACAGAGGGAGACACAAGGGCGAATTCCAGCACACTGGCGGCCGTTACTAGTGGATCCGAGCTCGGTACCAAGCTTGGCGTAATCATGGTCATAGCTGTTTCCTGTGTGAAWTGGTTATCCGCAA	Roseburia intestinalis L1-82 genome assembly, chromosome: 1	LR027880.1
					Roseburia intestinalis XB6B4 draft genome	FP929050.1
					Roseburia intestinalis M50/1 draft genome	FP929049.1
					Suicide vector pMC3752, complete sequence	MN186288.1
					Uncultured prokaryote gene for 16S ribosomal RNA, partial sequence, OTU:AA7374	LC244184.1
			2	CGCCAGTGTGATGGATATCTGCAGAATTCGCCCTTGTGTCTCCCTCTGTAAAGTCAACTTCAATGTTCTCTTTCTTGATTCCCAAAGGTTTCATTTCCATATCGGTAAGCGGAACCGGCTTGCTTCCCGGACCAACAAATCCGGTAACACCACGGGTATTTTAAGGGCGAATTCCAGCACACTGGCGGCCGTTACTAGTGGATCCGAGCTCGGTACCAAGCTTGGCGTAATCATGGTCATAGCTGTTTCCTGTGTGAAATGGTTATCCGCAA	Roseburia intestinalis L1-82 genome assembly, chromosome: 1	LR027880.1
					Roseburia intestinalis XB6B4 draft genome	FP929050.1
					Roseburia intestinalis M50/1 draft genome	FP929049.1
					Suicide vector pMC3752, complete sequence	MN186288.1
					Cloning vector pHR-res-Ech_0379-Amtr-mCh-Gent, complete sequence	MF068807.1
			3	CGCCAGTGTGATGGATATCTGCAGAATTCGCCCTTGTGTCTCCCTCTGTAAAGTCAACTTCAATGTTCTCTTTCTTGATTCCCAAAGGTTTCATTTCCATATCGGTAAGCGGAACCGGCTTGCTTCCCGGACCAACAAATCCGGTAACACCACGGGTATTTAAGGGCGAATTCCAGCACACTGGCGGCCGTTACTAGTGGATCCGAGCTCGGTACCAAGCTTGGCGTAATCATGGTCATAGCTGTTTCCTGTGTGAAATTGTTATCCGCA	Roseburia intestinalis L1-82 genome assembly, chromosome: 1	LR027880.1
					Roseburia intestinalis XB6B4 draft genome	FP929050.1
					Roseburia intestinalis M50/1 draft genome	FP929049.1
					Suicide vector pMC3752, complete sequence	MN186288.1
					Cloning vector pHR-res-Ech_0379-Amtr-mCh-Gent, complete sequence	MF068807.1
			4	CGCCAGTGTGATGGATATCTGCAGAATTCGCCCTTGTGTCTCCCTCTGTAAAGTCAACTTCAATGTTCTCTTTCTTGATTCCCAAAGGTTTCATTTCCATATCGGTAAGCGGAACCGGCTTGCTTCCCGGACCAACAAATCCGGTAACACCACGGGTATTTAAGGGCGAATTCCAGCACACTGGCGGCCGTTACTAGTGGATCCGAGCTCGGTACCAAGCTTGGCGTAATCATGGTCATAGCTGTTTCCTGTGTGAAATTKGTTATCCGCAA	Roseburia intestinalis L1-82 genome assembly, chromosome: 1	LR027880.1
					Roseburia intestinalis XB6B4 draft genome	FP929050.1
					Roseburia intestinalis M50/1 draft genome	FP929049.1
					Suicide vector pMC3752, complete sequence	MN186288.1
					Cloning vector pHR-res-Ech_0379-Amtr-mCh-Gent, complete sequence	MF068807.1
			5	CGCCAGTGTGATGGATATCTGCAGAATTCGCCCTTGTGTCTCCCTCTGTAAAGTCAACTTCAATGTTCTCTTTCTTGATTCCCAAAGGTTTCATTTCCATATCGGTAAGCGGAACCGGCTTGCTTCCCGGACCAACAAATCCGGTAACACCACGGGTATTTAAGGGCGAATTCCAGCACACTGGCGGCCGTTACTAGTGGATCCGAGCTCGGTACCAAGCTTGGCGTAATCATGGTCATAGCTGTTTCCTGTGTGAAATTGTTATCCGCAA	Roseburia intestinalis L1-82 genome assembly, chromosome: 1	LR027880.1
					Roseburia intestinalis XB6B4 draft genome	FP929050.1
					Roseburia intestinalis M50/1 draft genome	FP929049.1
					Suicide vector pMC3752, complete sequence	MN186288.1
					Cloning vector pHR-res-Ech_0379-Amtr-mCh-Gent, complete sequence	MF068807.1

## Sheet: Roseburia_Low
Supplementary Table S7. Bacterial identification results of each genus by BLAST test
Roseburia sp. Low Top 5 Blast Results
No.	Sample	Name	Colony no.	Input sequence	Description	Accession
1	Candidate 18 (Ct: 37.29)	Ros_Mi_01	1	CGCCAGTGTGATGGATATCTGCAGAATTCGCCCTTGTGTCTCCCTCTGTAAAGTCAACCTCAATGTTCTCTGTCTTGATCCCAAGCGGTCTCATTTCCATGTCGGTAAGCGGTACCGGCTTCGATCCCGGACCAACAAATCCGGTAACACCACGGGTATTTAAGGGCGAATTCCAGCACACTGGCGGCCGTTACTAGTGGATCCGAGCTCGGTACCAAGCTTGGCGTAATCATGGTCATAGCTGTTTCCTGTGTGAATTGGGTTATCCGCA	Roseburia hominis isolate MGYG-HGUT-02517 genome assembly, chromosome: 1	LR699011.1
					Suicide vector pMC3752, complete sequence	MN186288.1
					Cloning vector pHR-res-Ech_0379-Amtr-mCh-Gent, complete sequence	MF068807.1
					Cloning vector pHR-Ech_0379-tuf-aadA, complete sequence	MF068806.1
					Cloning vector pVG363_Aste-U6a-Swap4-gRNA, complete sequence	MW030450.1
			2	CGCCAGTGTGATGGATATCTGCAGAATTCGCCCTTGTGTCTCCCTCTGTAAAGTCAACTTCAATGTTCTCTTTCTTGATTCCCAAAGGTTTCATTTCCATATCGGTAAGTGGAACCGGCTTGCTTCCCGGACCAACAAATCCGGTAACACCACGGGTATTTAAGGGCGAATTCCAGCACACTGGCGGCCGTTACTAGTGGATCCGAGCTCGGTACCAAGCTTGGCGTAATCATGGTCATAGCTGTTTCCTGTGTGAAAGGGGTTATCCGCAA	Roseburia intestinalis XB6B4 draft genome	FP929050.1
					Roseburia intestinalis M50/1 draft genome	FP929049.1
					Roseburia intestinalis L1-82 genome assembly, chromosome: 1	LR027880.1
					Suicide vector pMC3752, complete sequence	MN186288.1
					Cloning vector pHR-res-Ech_0379-Amtr-mCh-Gent, complete sequence	MF068807.1
			3	CGCCAGTGTGATGGATATCTGCAGAATTCGCCCTTGTGTCTCCCTCTGTAAAGTCAACTTCAATGTTCTCTTTTTTGATTCCCAATGGTTTCATTTCCATATCGGTAAGTGGAACCGGCTTACTTCCCGGACCAACAAATCCGGTAACACCACGGGTATTTAAGGGCGAATTCCAGCACACTGGCGGCCGTTACTAGTGGATCCGAGCTCGGTACCAAGCTTGGCGTAATCATGGTCATAGCTGTTTCCTGTGTGAATTGGTTATCCGCA	Roseburia intestinalis XB6B4 draft genome	FP929050.1
					Roseburia intestinalis M50/1 draft genome	FP929049.1
					Roseburia intestinalis L1-82 genome assembly, chromosome: 1	LR027880.1
					Suicide vector pMC3752, complete sequence	MN186288.1
					Cloning vector pHR-res-Ech_0379-Amtr-mCh-Gent, complete sequence	MF068807.1
			4	CGCCAGTGTGATGGATATCTGCAGAATTCGCCCTTGTGTCTCCCTCTGTAAAGTCAACTTCAATGTTCTCTTTTTTGATTCCCAATGGTTTCATTTCCATATCGGTAAGTGGAACCGGCTTACTTCCCGGACCAACAAATCCGGTAACACCACGGGTATTTAAGGGCGAATTCCAGCACACTGGCGGCCGTTACTAGTGGATCCGAGCTCGGTACCAAGCTTGGCGTAATCATGGTCATAGCTGTTTCCTGTGTGAAAGGGGTTATCCGCA	Roseburia intestinalis XB6B4 draft genome	FP929050.1
					Roseburia intestinalis M50/1 draft genome	FP929049.1
					Roseburia intestinalis L1-82 genome assembly, chromosome: 1	LR027880.1
					Suicide vector pMC3752, complete sequence	MN186288.1
					Cloning vector pHR-res-Ech_0379-Amtr-mCh-Gent, complete sequence	MF068807.1
			5	CGCCAGTGTGATGGATATCTGCAGAATTCGCCCTTGTGTCTCCCTCTGTAAAGTCAACCTCAATGTTCTCTGTCTTGATCCCAAGCGGTCTCATTTCCATATCGGTAAGCGGTACCGGCTTCGATCCCGGACCAACAAATCCGGTAACACCACGGGTATTTAAGGGCGAATTCCAGCACACTGGCGGCCGTTACTAGTGGATCCGAGCTCGGTACCAAGCTTGGCGTAATCATGGTCATAGCTGTTTCCTGTGTGAATTGGTTATCCGCA	Roseburia hominis isolate MGYG-HGUT-02517 genome assembly, chromosome: 1	LR699011.1
					Suicide vector pMC3752, complete sequence	MN186288.1
					Cloning vector pHR-res-Ech_0379-Amtr-mCh-Gent, complete sequence	MF068807.1
					Cloning vector pHR-Ech_0379-tuf-aadA, complete sequence	MF068806.1
					Cloning vector pVG363_Aste-U6a-Swap4-gRNA, complete sequence	MW030450.1
2	Candidate 96 (Ct: 37.08)	Ros_Mi_02	1	CGCCAGTGTGATGGATATCTGCAGAATTCGCCCTTGTGTCTCCCTCTGTAAAGTCAACTTCAATGTTCTCTTTTTTGATTCCCAATGGTTTCATTTCCATATCGGTAAGTGGAACCGGCTTACTTCCCGGACCAACAAATCCGGTAACACCACGGGTATTTAAGGGCGAATTCCAGCACACTGGCGGCCGTTACTAGTGGATCCGAGCTCGGTACCAAGCTTGGCGTAATCATGGTCATAGCTGTTTCCTGTGTGAATTGGGTTATCCGCA	Roseburia intestinalis XB6B4 draft genome	FP929050.1
					Roseburia intestinalis M50/1 draft genome	FP929049.1
					Roseburia intestinalis L1-82 genome assembly, chromosome: 1	LR027880.1
					Suicide vector pMC3752, complete sequence	MN186288.1
					Cloning vector pHR-res-Ech_0379-Amtr-mCh-Gent, complete sequence	MF068807.1
			2	CGCCAGTGTGATGGATATCTGCAGAATTCGCCCTTGTGTCTCCCTCTGTAAAGTCAACTTCAATGTTCTCTTTTTTGATTCCCAATGGTTTCATTTCCATATCGGTAAGTGGAACCGGCTTACTTCCCGGACCAACAAATCCGGTAACACCACGGGTATTTAAGGGCGAATTCCAGCACACTGGCGGCCGTTACTAGTGGATCCGAGCTCGGTACCAAGCTTGGCGTAATCATGGTCATAGCTGTTTCCTGTGTGAATTGGTTATCCGCAA	Roseburia intestinalis XB6B4 draft genome	FP929050.1
					Roseburia intestinalis M50/1 draft genome	FP929049.1
					Roseburia intestinalis L1-82 genome assembly, chromosome: 1	LR027880.1
					Suicide vector pMC3752, complete sequence	MN186288.1
					Cloning vector pHR-res-Ech_0379-Amtr-mCh-Gent, complete sequence	MF068807.1
			3	CGCCAGTGTGATGGATATCTGCAGAATTCGCCCTTGTGTCTCCCTCTGTAAAGTCAACTTCAACGTTCTCTTTTTTGATTCCCAATGGTTTCATTTCCATGTCGGTAAGTGGAACCGGCTTACTTCCCGGACCAACAAATCCGGTAACACCACGGGTATTTAAGGGCGAATTCCAGCACACTGGCGGCCGTTACTAGTGGATCCGAGCTCGGTACCAAGCTTGGCGTAATCATGGTCATAGCTGTTTCCTGTGTGAAATGGTTATCCGCAA	Roseburia intestinalis XB6B4 draft genome	FP929050.1
					Roseburia intestinalis M50/1 draft genome	FP929049.1
					Roseburia intestinalis L1-82 genome assembly, chromosome: 1	LR027880.1
					Suicide vector pMC3752, complete sequence	MN186288.1
					Cloning vector pHR-res-Ech_0379-Amtr-mCh-Gent, complete sequence	MF068807.1
			4	CGCCAGTGTGATGGATATCTGCAGAATTCGCCCTTGTGTCTCCCTCTGTAAAGTCAACTTCAATGTTCTCTTTTTTGATTCCCAATGGTTTCATTTCCATATCGGTAAGTGGAACCGGCTTACTTCCCGGACCAACAAATCCGGTAACACCACGGGTATTTAAGGGCGAATTCCAGCACACTGGCGGCCGTTACTAGTGGATCCGAGCTCGGTACCAAGCTTGGCGTAATCATGGTCATAGCTGTTTCCTGTGTGAATTGGGTTATCCGCA	Roseburia intestinalis XB6B4 draft genome	FP929050.1
					Roseburia intestinalis M50/1 draft genome	FP929049.1
					Roseburia intestinalis L1-82 genome assembly, chromosome: 1	LR027880.1
					Suicide vector pMC3752, complete sequence	MN186288.1
					Cloning vector pHR-res-Ech_0379-Amtr-mCh-Gent, complete sequence	MF068807.1
			5	CGCCAGTGTGATGGATATCTGCAGAATTCGCCCTTGTGTCTCCCTCTGTAAAGTCAACTTCAATGTTCTCTTTTTTGATTCCCAATGGTTTCATTTCCATATCGGTAAGTGGAACCGGCTTACTTCCCGGACCAACAAATCCGGTAACACCACGGGTATTTAAGGGCGAATTCCAGCACACTGGCGGCCGTTACTAGTGGATCCGAGCTCGGTACCAAGCTTGGCGTAATCATGGTCATAGCTGTTTCCTGTGTGAATTKGGTTATCCGCA	Roseburia intestinalis XB6B4 draft genome	FP929050.1
					Roseburia intestinalis M50/1 draft genome	FP929049.1
					Roseburia intestinalis L1-82 genome assembly, chromosome: 1	LR027880.1
					Suicide vector pMC3752, complete sequence	MN186288.1
					Cloning vector pHR-res-Ech_0379-Amtr-mCh-Gent, complete sequence	MF068807.1
3	Candidate 50 (Ct: 32.70)	Ros_Mi_03	1	CGCCAGTGTGATGGATATCTGCAGAATTCGCCCTTAATACCCGTGGTGTTACCGGATTTGTTGGTCCGGGAAGCAAGCCGGTTCCGCTTACCGATATGGAAATGAAACCTTTGGGAATCAAGAAAGAGAACATTGAAGTTGACTTTACAGAGGGAGACACAAGGGCGAATTCCAGCACACTGGCGGCCGTTACTAGTGGATCCGAGCTCGGTACCAAGCTTGGCGTAATCATGGTCATAGCTGTTTCCTGTGTGAAATTGTTATCCGCAA	Roseburia intestinalis L1-82 genome assembly, chromosome: 1	LR027880.1
					Roseburia intestinalis XB6B4 draft genome	FP929050.1
					Roseburia intestinalis M50/1 draft genome	FP929049.1
					Suicide vector pMC3752, complete sequence	MN186288.1
					Uncultured prokaryote gene for 16S ribosomal RNA, partial sequence, OTU:AA7374	LC244184.1
			2	CGCCAGTGTGATGGATATCTGCAGAATTCGCCCTTGTGTCTCCCTCTGTAAAGTCAACTTCAATGTTCTCTTTCTTGATTCCCAAAGGTTTCATTTCCATATCGGTAAGCGGAACCGGCTTGCTTCCCGGACCAACAAATCCGGTAACACCACGGGTATTTAAGGGCGAATTCCAGCACACTGGCGGCCGTTACTAGTGGATCCGAGCTCGGTACCAAGCTTGGSGTAATCATGGKCATAGCTGTTTCCTGTGTGAAAWWGTTATCCSCACAAA	Roseburia intestinalis L1-82 genome assembly, chromosome: 1	LR027880.1
					Roseburia intestinalis XB6B4 draft genome	FP929050.1
					Roseburia intestinalis M50/1 draft genome	FP929049.1
					Suicide vector pMC3752, complete sequence	MN186288.1
					Cloning vector pHR-res-Ech_0379-Amtr-mCh-Gent, complete sequence	MF068807.1
			3	CGCCAGTGTGATGGATATCTGCAGAATTCGCCCTTGTGTCTCCCTCTGTAAAGTCAACTTCAATGTTCTCTTTCTTGATTCCCAAAGGTTTCATTTCCATATCGGTAAGCGGAACCGGCTTGCTTCCCGGACCAACAAATCCGGTAACACCACGGGTATTTAAGGGCGAATTCCAGCACACTGGCGGCCGTTACTAGTGGATCCGAGCTCGGTACCAAGCTTGGCGTAATCATGGTCATAGCTGTTTCCTGTGTGAATTKGTTATCCGCAA	Roseburia intestinalis L1-82 genome assembly, chromosome: 1	LR027880.1
					Roseburia intestinalis XB6B4 draft genome	FP929050.1
					Roseburia intestinalis M50/1 draft genome	FP929049.1
					Suicide vector pMC3752, complete sequence	MN186288.1
					Cloning vector pHR-res-Ech_0379-Amtr-mCh-Gent, complete sequence	MF068807.1
			4	CGCCAGTGTGATGGATATCTGCAGAATTCGCCCTTGTGTCTCCCTCTGTAAAGTCAACTTCAATGTTCTCCTTCTTGATTCCCAAAGGTTTCATTTCCATATCGGTAAGCGGAACCGGCTTGCTTCCCGGACCAACAAATCCGGTAACACCACGGGTATTTAAGGGCGAATTCCAGCACACTGGCGGCCGTTACTAGTGGATCCGAGCTCGGTACCAAGCTTGGCGTAATCATGGTCATAGCTGTTTCCTGTGTGAAATTGTTATCCGCA	Roseburia intestinalis L1-82 genome assembly, chromosome: 1	LR027880.1
					Roseburia intestinalis XB6B4 draft genome	FP929050.1
					Roseburia intestinalis M50/1 draft genome	FP929049.1
					Suicide vector pMC3752, complete sequence	MN186288.1
					Cloning vector pHR-res-Ech_0379-Amtr-mCh-Gent, complete sequence	MF068807.1
			5	CGCCAGTGTGATGGATATCTGCAGAATTCGCCCTTGTGTCTCCCTCTGTAAAGTCAACTTCAATGTTCTCTTTTTTGATTCCCAATGGTTTCATTTCCATATCGGTAAGTGGAACCGGCTTACTTCCCGGACCAACAAATCCGGTAACACCACGGGTATTTAAGGGCGAATTCCAGCACACTGGCGGCCGTTACTAGTGGATCCGAGCTCGGTACCAAGCTTGGCGTAATCATGGTCATAGCTGTTTCCTGTGTGAAATTGTTATCCGCA	Roseburia intestinalis XB6B4 draft genome	FP929050.1
					Roseburia intestinalis M50/1 draft genome	FP929049.1
					Roseburia intestinalis L1-82 genome assembly, chromosome: 1	LR027880.1
					Suicide vector pMC3752, complete sequence	MN186288.1
					Cloning vector pHR-res-Ech_0379-Amtr-mCh-Gent, complete sequence	MF068807.1
4	Candidate 26 (Ct: 31.81)	Ros_Mi_04	1	CGCCAGTGTGATGGATATCTGCAGAATTCGCCCTTGTGTCTCCCTCTGTAAAGTCAACTTCAATGTTCTCTTTTTTGATTCCCAATGGTTTCATTTCCATATCGGTAAGTGGAACCGGCTTACTTCCCGGACCAACAAATCCGGTAACACCACGGGTATTTAAGGGCGAATTCCAGCACACTGGCGGCCGTTACTAGTGGATCCGAGCTCGGTACCAAGCTTGGCGTAATCATGGTCATAGCTGTTTCCTGTGTGAAATTKGTTWTCCGCAA	Roseburia intestinalis XB6B4 draft genome	FP929050.1
					Roseburia intestinalis M50/1 draft genome	FP929049.1
					Roseburia intestinalis L1-82 genome assembly, chromosome: 1	LR027880.1
					Suicide vector pMC3752, complete sequence	MN186288.1
					Cloning vector pHR-res-Ech_0379-Amtr-mCh-Gent, complete sequence	MF068807.1
			2	CGCCAGTGTGATGGATATCTGCAGAATTCGCCCTTGTGTCTCCCTCTGTAAAGTCAACTTCAATGTTCTCTTTCTTGATTCCCAAAGGTTTCATTTCCATATCGGAAAGCGGAACCGGCTTGCTTCCCGGACCAACAAATCCGGTAACACCACGGGTATTTAAGGGCGAATTCCAGCACACTGGCGGCCGTTACTAGTGGATCCGAGCTCGGTACCAAGCTTGGCGTAATCATGGTCATAGCTGTTTCCTGKGKGAATTGTTATCCSSMA	Roseburia intestinalis L1-82 genome assembly, chromosome: 1	LR027880.1
					Roseburia intestinalis XB6B4 draft genome	FP929050.1
					Roseburia intestinalis M50/1 draft genome	FP929049.1
					Suicide vector pMC3752, complete sequence	MN186288.1
					Cloning vector pHR-res-Ech_0379-Amtr-mCh-Gent, complete sequence	MF068807.1
			3	CGCCAGTGTGATGGATATCTGCAGAATTCGCCCTTGTGTCTCCCTCTGTAAAGTCAACTTCAATGTTCTCTTTCTTGATTCCCAAAGGTTTCATTTCCATATCGGTAAGCGGAACCGGCTTGCTTCCCGGACCAACAAATCCGGTAACACCACGGGTATTTAAGGGCGAATTCCAGCACACTGGCGGCCGTTACTAGTGGATCCGAGCTCGGTACCAAGCTTGGCGTAATCATGGTCATAGCTGTTTCCTGTGTGAAATTGTTATCCGCA	Roseburia intestinalis L1-82 genome assembly, chromosome: 1	LR027880.1
					Roseburia intestinalis XB6B4 draft genome	FP929050.1
					Roseburia intestinalis M50/1 draft genome	FP929049.1
					Suicide vector pMC3752, complete sequence	MN186288.1
					Cloning vector pHR-res-Ech_0379-Amtr-mCh-Gent, complete sequence	MF068807.1
			4	CGCCAGTGTGATGGATATCTGCAGAATTCGCCCTTGTGTCTCCCTCTGTAAAGTCAACTTCAATGTTCTCTTTTTTGATTCCCAATGGTTTCATTTCCATATCGGTAAGTGGAACCGGCTTACTTCCCGGACCAACAAATCCGGTAACACCACGGGTATTTAAGGGCGAATTCCAGCACACTGGCGGCCGTTACTAGTGGATCCGAGCTCGGTACCAAGCTTGGCGTAATCATGGTCATAGCTGTTTCCTGTGTGAAATTGTTATCCGCA	Roseburia intestinalis XB6B4 draft genome	FP929050.1
					Roseburia intestinalis M50/1 draft genome	FP929049.1
					Roseburia intestinalis L1-82 genome assembly, chromosome: 1	LR027880.1
					Suicide vector pMC3752, complete sequence	MN186288.1
					Cloning vector pHR-res-Ech_0379-Amtr-mCh-Gent, complete sequence	MF068807.1
			5	CGCCAGTGTGATGGATATCTGCAGAATTCGCCCTTGTGTCTCCCTCTGTAAAGTCAACTTCAATGTTCTCTTTTTTGATTCCCGATGGTTTCATTTCCATATCGGTAAGTGGAACCGGCTTACTTCCCGGACCAACAAATCCGGTAACACCACGGGTATTTAAGGGCGAATTCCAGCACACTGGCGGCCGTTACTAGTGGATCCGAGCTCGGTACCAAGCTTGGCGTAATCATGGTCATAGCTGTTTCCTGTGTGAAATTGTTATCCGCA	Roseburia intestinalis XB6B4 draft genome	FP929050.1
					Roseburia intestinalis M50/1 draft genome	FP929049.1
					Roseburia intestinalis L1-82 genome assembly, chromosome: 1	LR027880.1
					Suicide vector pMC3752, complete sequence	MN186288.1
					Cloning vector pHR-res-Ech_0379-Amtr-mCh-Gent, complete sequence	MF068807.1
5	Candidate 56 (Ct: 31.22)	Ros_Mi_05	1	CGCCAGTGTGATGGATATCTGCAGAATTCGCCCTTGTGTCTCCCTCTGTAAAGTCAACTTCAATGTTCTCTTTTTTGATTCCCAATGGTTTCATTTCCATATCGGTAAGTGGAACCGGCTTACTTCCCGGRCCAACAAATCCGGTAACACCACGGGTATTTAAGGGCGAATTCCAGCACACTGGCGGCCGTTACTAGTGGATCCGAGCTCGGTACCAAGCTTGGCGTAATCATGGTCATAGCTGTTTCCTGTGTGAAAWTGTTATCCGCACAAA	Roseburia intestinalis XB6B4 draft genome	FP929050.1
					Roseburia intestinalis M50/1 draft genome	FP929049.1
					Roseburia intestinalis L1-82 genome assembly, chromosome: 1	LR027880.1
					Suicide vector pMC3752, complete sequence	MN186288.1
					Cloning vector pHR-res-Ech_0379-Amtr-mCh-Gent, complete sequence	MF068807.1
			2	CGCCAGTGTGATGGATATCTGCAGAATTCGCCCTTGTGTCTCCCTCTGTAAAGTCAACTTCAATGTTCTCTTTCTTGATTCCCAAAGGTTTCATTTCCATATCGGTAAGCGGAACCGGCTTGCTTCCCGGACCAACAAATCCGGTAACACCACGGGTATTTAAGGGCGAATTCCAGCACACTGGCGGCCGTTACTAGTGGATCCGAGCTCGGTACCAAGCTTGGCGTAATCATGGTCATAGCTGTTTCCTGTGTGAAATTGTTATCCGCA	Roseburia intestinalis L1-82 genome assembly, chromosome: 1	LR027880.1
					Roseburia intestinalis XB6B4 draft genome	FP929050.1
					Roseburia intestinalis M50/1 draft genome	FP929049.1
					Suicide vector pMC3752, complete sequence	MN186288.1
					Cloning vector pHR-res-Ech_0379-Amtr-mCh-Gent, complete sequence	MF068807.1
			3	CGCCAGTGTGATGGATATCTGCAGAATTCGCCCTTAAATACCCCGTGGTGTTACCGGATTTGTTGGTCCGGGAAGCAAGCCGGTTCCGCTTACCGATATGGAAATGAAACCTTTGGGAATCAAGAAAGAGAACATTGAAGTTGACTTTACAGAGGGAGACACAAGGGSGAATTCCAGCACACTGGSGGSCGTTACTAGTGGATCCGAGCTCGGTACCMAGCTTGGSGTAATCATGGKCATAGCTGTKTCCTGTGTGAASWWGTKATCCSCACAAAA	Roseburia intestinalis L1-82 genome assembly, chromosome: 1	LR027880.1
					Roseburia intestinalis XB6B4 draft genome	FP929050.1
					Roseburia intestinalis M50/1 draft genome	FP929049.1
					Suicide vector pMC3752, complete sequence	MN186288.1
					Cloning vector pHR-res-Ech_0379-Amtr-mCh-Gent, complete sequence	MF068807.1
			4	CGCCAGTGTGATGGATATCTGCAGAATTCGCCCTTGTGTCTCCCTCTGTAAAGTCAACTTCAATGTTCTCTTTCTTGATTCCCAAAGGTTTCATTTCCATATCGGTAAGCGGAACCGGCTTGCTTCCCGGACCAACAAATCCGGTAACACCACGGGTATTTAAGGGCGAATTCCAGCACACTGGCGGCCGTTACTAGTGGATCCGAGCTCGGTACCAAGCTTGGSGTAATCATGGTCATAGCTGTTTCCTGTGTGAAATWGWTATCCSCACAAA	Roseburia intestinalis L1-82 genome assembly, chromosome: 1	LR027880.1
					Roseburia intestinalis XB6B4 draft genome	FP929050.1
					Roseburia intestinalis M50/1 draft genome	FP929049.1
					Suicide vector pMC3752, complete sequence	MN186288.1
					Cloning vector pHR-res-Ech_0379-Amtr-mCh-Gent, complete sequence	MF068807.1
			5	CGCCAGTGTGATGGATATCTGCAGAATTCGCCCTTGTGTCTCCCTCTGTAAAGTCAACTTCAATGTTCTCTTTCTTGATTCCCAAAGGTTTCATTTCCATATCGGTAAGCGGAACCGGCTTGCTTCCCGGACCAACAAATCCGGTAACACCACGGGTATTTAAGGGCGAATTCCAGCACACTGGCGGCCGTTACTAGTGGATCCGAGCTCGGTACCAAGCTTGGCGTAATCATGGTCATAGCTGTTTCCTGTGTGAATTGTTATCCGCAA	Roseburia intestinalis L1-82 genome assembly, chromosome: 1	LR027880.1
					Roseburia intestinalis XB6B4 draft genome	FP929050.1
					Roseburia intestinalis M50/1 draft genome	FP929049.1
					Suicide vector pMC3752, complete sequence	MN186288.1
					Cloning vector pHR-res-Ech_0379-Amtr-mCh-Gent, complete sequence	MF068807.1
