# Supplementary material for: A qRT-PCR Method Capable of Quantifying Specific Microorganisms Compared to NGS-Based Metagenome Profiling Data
Source: Microorganisms. 2022 Jan 30;10(2):324. doi: 10.3390/microorganisms10020324 (PMC8875016; doi:10.3390/microorganisms10020324)
Supplement: Supplementary file 1 [file microorganisms-10-00324-s001.zip › Supplementary Table S1.xlsx]

## Sheet: Sheet2
Supplementary Table S1. Statistical results of 16S V3-V4 metagenome sequencing data processing
Sample ID	Demultiplexed reads count	Filtered reads count	Denoised reads count	Merged reads count	Non-chimeric reads count	Region
Candidate 1	51037	32366	30955	28174	24573	V3-V4
Candidate 2	71842	52433	50734	47157	37295	V3-V4
Candidate 3	141650	84169	82727	78634	74409	V3-V4
Candidate 4	213595	139017	134968	123547	95031	V3-V4
Candidate 5	104639	84440	83058	79911	72197	V3-V4
Candidate 6	86373	53067	51740	48622	35380	V3-V4
Candidate 7	82425	65687	64694	62512	58944	V3-V4
Candidate 8	126685	82714	78991	71654	56301	V3-V4
Candidate 9	340292	228894	223695	206741	150874	V3-V4
Candidate 10	85524	63511	61318	56119	46347	V3-V4
Candidate 11	164508	124865	121716	114488	95657	V3-V4
Candidate 12	42487	18509	16558	14060	12207	V3-V4
Candidate 13	138320	108164	103438	98714	90178	V3-V4
Candidate 14	158384	82742	81401	78090	73890	V3-V4
Candidate 15	130108	85238	81569	71893	55491	V3-V4
Candidate 16	172987	116964	112805	102195	75171	V3-V4
Candidate 17	84739	51409	49770	46889	40794	V3-V4
Candidate 18	159044	124767	123681	119491	73971	V3-V4
Candidate 19	354884	219464	213186	186463	107218	V3-V4
Candidate 20	92881	66809	63812	57090	47350	V3-V4
Candidate 21	44206	31378	30081	27449	23441	V3-V4
Candidate 22	112877	87125	85021	80684	66993	V3-V4
Candidate 23	99377	79968	78650	75964	68318	V3-V4
Candidate 24	26619	17338	16771	15857	14847	V3-V4
Candidate 25	100018	79240	77782	74647	70335	V3-V4
Candidate 26	107334	85107	83746	80816	75321	V3-V4
Candidate 27	157511	83956	79520	70503	57439	V3-V4
Candidate 28	48376	25951	24318	21814	18419	V3-V4
Candidate 29	143780	109838	108529	103672	80653	V3-V4
Candidate 30	62671	46943	45127	40829	33703	V3-V4
Candidate 31	62098	43199	39760	34529	31751	V3-V4
Candidate 32	74091	43486	41585	36853	29949	V3-V4
Candidate 33	135879	92643	89217	81020	65427	V3-V4
Candidate 34	371647	249503	243096	228909	175692	V3-V4
Candidate 35	90501	57691	56075	51919	42259	V3-V4
Candidate 36	85965	49232	48073	45633	43347	V3-V4
Candidate 37	281034	175641	173762	167768	137557	V3-V4
Candidate 38	135023	89207	85655	79055	66684	V3-V4
Candidate 39	131065	96062	94543	88786	71792	V3-V4
Candidate 40	89131	63559	58786	52111	45509	V3-V4
Candidate 41	85209	55372	53929	50284	40329	V3-V4
Candidate 42	90055	68687	67127	63670	58521	V3-V4
Candidate 43	144388	86476	85235	82159	71121	V3-V4
Candidate 44	75400	52163	49579	45074	39079	V3-V4
Candidate 45	193762	122054	117934	108684	89375	V3-V4
Candidate 46	75099	54485	52811	48114	39679	V3-V4
Candidate 47	189086	152302	149700	144934	118996	V3-V4
Candidate 48	103927	57163	55952	51928	38402	V3-V4
Candidate 49	89881	54715	51305	45659	38666	V3-V4
Candidate 50	91959	65616	64191	59308	44406	V3-V4
Candidate 51	146260	112620	106882	100132	88566	V3-V4
Candidate 52	52943	29888	28234	24647	20605	V3-V4
Candidate 53	56749	43060	41981	39827	36678	V3-V4
Candidate 54	172773	135705	132525	125295	104907	V3-V4
Candidate 55	248246	159155	155490	144489	109804	V3-V4
Candidate 56	185246	148124	143040	136894	122482	V3-V4
Candidate 57	99288	77537	74961	69956	56992	V3-V4
Candidate 58	263769	179675	175063	160801	108412	V3-V4
Candidate 59	146725	90576	84950	77110	69602	V3-V4
Candidate 60	149203	70604	66500	58355	47566	V3-V4
Candidate 61	52157	34692	32851	29583	23786	V3-V4
Candidate 62	83161	59520	58486	54585	41476	V3-V4
Candidate 63	59084	41470	38817	34149	27624	V3-V4
Candidate 64	67435	43996	39790	35338	31461	V3-V4
Candidate 65	202617	126248	121762	111111	93034	V3-V4
Candidate 66	385380	255564	246846	219493	152310	V3-V4
Candidate 67	74668	56872	54389	51690	49974	V3-V4
Candidate 68	107577	67277	62784	56943	51366	V3-V4
Candidate 69	180730	118590	114676	105519	86830	V3-V4
Candidate 70	257402	169855	166867	157003	129920	V3-V4
Candidate 71	182397	107397	103442	94721	72065	V3-V4
Candidate 72	176639	109233	105177	97501	78536	V3-V4
Candidate 73	137020	71846	70403	67151	64831	V3-V4
Candidate 74	122992	96628	94384	90277	86056	V3-V4
Candidate 75	154882	110599	105512	95405	77436	V3-V4
Candidate 76	117799	79620	77321	70834	48980	V3-V4
Candidate 77	66740	42521	41502	38766	30493	V3-V4
Candidate 78	249174	197152	193522	187474	159860	V3-V4
Candidate 79	38392	22512	21490	19579	16554	V3-V4
Candidate 80	68942	48805	47060	42692	34392	V3-V4
Candidate 81	272316	176771	171219	155310	99110	V3-V4
Candidate 82	281388	220254	215276	207772	176724	V3-V4
Candidate 83	41785	27922	26374	23730	20270	V3-V4
Candidate 84	227001	153279	149264	139212	114370	V3-V4
Candidate 85	56309	40736	39831	36678	25918	V3-V4
Candidate 86	71110	51024	49189	45469	42465	V3-V4
Candidate 87	129510	87299	83684	76615	64052	V3-V4
Candidate 88	42884	25479	24218	21656	19314	V3-V4
Candidate 89	336081	272253	265878	253767	211071	V3-V4
Candidate 90	54217	32741	30772	27113	23482	V3-V4
Candidate 91	154051	86462	82280	74876	64861	V3-V4
Candidate 92	84594	51302	49186	45221	38214	V3-V4
Candidate 93	143760	95715	92916	85552	71697	V3-V4
Candidate 94	81717	57199	55822	51869	38782	V3-V4
Candidate 95	87853	35402	32765	29205	27819	V3-V4
Candidate 96	230234	146791	143329	132015	96944	V3-V4
Candidate 97	114855	86910	85868	82168	63064	V3-V4
Candidate 98	104849	62385	60576	56278	40667	V3-V4
Candidate 99	80243	60560	57513	53035	45016	V3-V4
Candidate 100	121288	67663	65967	63562	61490	V3-V4
