# Supplementary material for: A qRT-PCR Method Capable of Quantifying Specific Microorganisms Compared to NGS-Based Metagenome Profiling Data
Source: Microorganisms. 2022 Jan 30;10(2):324. doi: 10.3390/microorganisms10020324 (PMC8875016; doi:10.3390/microorganisms10020324)
Supplement: Supplementary file 1 [file microorganisms-10-00324-s001.zip › Supplementary Table S3.xlsx]

## Sheet: Akkermansia
Supplementary Table S3. Overall information about bacterial taxonomy annotated on NCBI database for qPCR-only primer design
Bacterial genus	Species name	Strain number	Target gene	NCBI protein acession
Akkermansia	glycaniphila	Pyt	*ddl	WP_067774579.1
				SEH81405.1
				OCA03277.1
	muciniphila	GP28		WP_102748316.1
		139		WP_102743040.1
		GP27		WP_102739932.1
		H2		WP_102731996.1
		GP12		WP_102728954.1
		GP22		WP_102726056.1
		GP24		WP_102712691.1
		-		WP_094136794.1
		AMDK-1		WP_046437722.1
		-		WP_031930414.1
		GP42		WP_022397716.1
		AMDK-8		WP_022197153.1
		ATCC BAA-835		WP_012419713.1
		am_0171		RYU07929.1
		139		QBH16194.1
		CBA5201		QAT91519.1
		H2		QAR50775.1
		EB-AMDK-22		QAA68442.1
		EB-AMDK-21		QAA66187.1
		EB-AMDK-20		QAA63928.1
		EB-AMDK-19		QAA61679.1
		EB-AMDK-17		QAA57016.1
		EB-AMDK-16		QAA54706.1
		EB-AMDK-14		QAA50135.1
		EB-AMDK-13		QAA47814.1
		EB-AMDK-12		QAA45497.1
		EB-AMDK-11		QAA43193.1
		EB-AMDK-10		QAA40877.1
		EB-AMDK-8		QAA38485.1
		EB-AMDK-7		QAA36084.1
		GP35		PND15689.1
		BSM09		PND12096.1
		GP02		PND09192.1
		GP09		PND07616.1
		GP14		PND07225.1
		GP28		PND02305.1
		GP13		PNC98754.1
		GP19		PNC97831.1
		GP27		PNC96894.1
		GP16		PNC94836.1
		GP20		PNC91089.1
		GP21		PNC87441.1
		GP40		PNC87102.1
		GP05		PNC82341.1
		GP23		PNC81138.1
		GP26		PNC80399.1
		GP01		PNC77589.1
		GP29		PNC72929.1
		GP36		PNC71780.1
		GP06		PNC70190.1
		GP03		PNC68004.1
		GP04		PNC65344.1
		GP39		PNC60930.1
		GP08		PNC60054.1
		GP43		PNC56369.1
		GP38		PNC55168.1
		BSH05		PNC50594.1
		GP11		PNC50285.1
		GP10		PNC46360.1
		GP41		PNC42432.1
		GP42		PNC40941.1
		BSH01		PNC37377.1
		GP07		PNC34368.1
		GP15		PNC28986.1
		GP30		PNC24407.1
		GP12		PNC24071.1
		GP25		PNC21734.1
		GP24		PNC18916.1
		GP22		PNC04525.1
		An78		OUN27274.1
		-		HBW71710.1
		-		HBD70458.1
		CAG:154		CDB56416.1
		EB-AMDK-2		AYR34565.1
		EB-AMDK-4		AYR32272.1
		EB-AMDK-3		AYR29490.1
		EB-AMDK-1		AYR27260.1
		YL44		ASB35339.1
				ANU61850.1
		ATCC BAA-835		ACD04498.1
*ddl: D-alanine D-alanine ligase protein

## Sheet: Bacteroides
Supplementary Table S3. Overall information about bacterial taxonomy annotated on NCBI database for qPCR-only primer design
Bacterial genus	Species name	Strain number	Target gene	NCBI protein acession
Bacteroides	faeci	MAJ27	*nusG	SDW17440.1
	faecis	bf_0095		RYT90757.1
	fragili	NCTC 9343		WP_005782159.1
	ovatus	3725 D9 iii		KDS42228.1
		V975		SCV06821.1
	thetaiotaomicron	VPI-5482		WP_004296362.1
		dnLKV9		EOR99221.1
	uniformis	ATCC 8492		WP_005825724.1
		-		CDE03361.1
	vulgatus	NLAE-zl-G202		SEK64549.1
		-		WP_007838969.1
		-		CDF17170.1
		CL09T03C04		WP_005844824.1
		-		EFG18889.1
		3775 SL(B) 10 (iv)		WP_032946164.1
*nusG: transcription termination/anti-termination protein

## Sheet: Bifidobacterium
Supplementary Table S3. Overall information about bacterial taxonomy annotated on NCBI database for qPCR-only primer design
Bacterial genus	Species name	Strain number	Target gene	NCBI protein acession
Bifidobacterium	actinocoloniiforme	DSM 22766	transaldolase	KFI40037.1
	adolescentis	FHHMB 40		ABI64256.1
		22L		WP_011743200.1
		L2-32		EDN82873.1
	aemilianum	XV10		WP_113859769.1
				RBP98085.1
	aesculapii	DSM 26737		WP_055427770.1
	angulatum	JCM 7096		ACT21096.1
		LMG 11039		WP_003826288.1
		GT102		WP_045919826.1
	animalis	OM05-7AA		RGN18007.1
		co_0103		RYT85562.1
	animalis subsp. animalis	YL2		PHQ54601.1
		ATCC 25527		WP_014697685.1
		MCC 1489		KOA64924.1
	animalis subsp. lactis	BB-12		ACI48591.1
		DSM 10140		AAL15880.1
		AD011		ACL29643.1
		ATCC 27536		WP_004217932.1
				KOA46312.1
		ATCC 27673		KOA47398.1
				KOA52656.1
		B420		AFJ16571.1
		BB-12		ADC85858.1
				PIN32068.1
		Bi-07		AFJ18150.1
		Bl-04; ATCC SD5219		ACS46205.1
		Bl12		AGO52303.1
		BLC1		AEN76580.1
		BS 01		EHN18006.1
		CECT 8145		CDL71543.1
		CNCM I-2494		AEK30293.1
		DSM 10140		ACS47772.1
		HN019		EDT89875.1
		KLDS2.0603		AJC76531.1
		V9		ADG33397.1
	anseris	Goo31D		WP_026645327.1
				PLS28233.1
	aquikefiri	LMG 28769		WP_094693423.1
				OZG67002.1
	asteroides	Bin2		WP_029678820.1
		PRL2011		AFU71392.1
	biavatii	DSM 23969		WP_033492192.1
	bifidum	NCTC10471		SPU24253.1
		BGN4		WP_003813255.1
				AFL04545.1
		S17		ADO53178.1
	bohemicum	R-53250		WP_033520131.1
				SCB74751.1
		DSM 22767		KFI46547.1
	bombi	DSM 19703		WP_044086763.1
				KFF31258.1
	boum	LMG 10736		WP_026502889.1
				KFI49173.1
	breve	BR-06		WP_003829348.1
		ACS-071-V-Sch8b		AEF27370.1
		UCC2003		ABE95684.1
	callitrichidarum	TRI 5		WP_109056065.1
				PWG66825.1
	callitrichos	UMA51804		WP_107041684.1
		UMA51805		PST45439.1
		DSM 23973		WP_043163737.1
	catenulatum	IF3-131		AKE49120.1
		FHHMB OV2-1ch		ADQ26401.1
		JCM 1194		ACV83795.1
		1899B		WP_003834796.1
	catulorum	MRM 8.19		WP_109136289.1
				PWG60693.1
	choerinum	DSM 20434		WP_024541315.1
	commune	R-52791		WP_091847302.1
				SCC78889.1
	coryneforme	LMG18911		WP_033490090.1
	criceti	Ham19E		WP_095615118.1
				PAU67394.1
	crudilactis	LMG 23609		WP_034252437.1
	cuniculi	LMG 10738		WP_033516383.1
				KFI66009.1
	dentium	NCTC11816		WP_003840161.1
		Bd1		ADB09774.1
		DSM 20436		SEB50103.1
		JCVIHMP022		EFO78799.1
	eulemuris	DSM 100216		WP_072725995.1
				OZG69190.1
	felsineum	TRE H		WP_100493989.1
				PJM77227.1
	gallicum	DSM 20093		WP_006294631.1
		LMG 11596		KFI58772.1
	gallinarum	CACC 514		WP_033505643.1
				QAY32902.1
	hapali	DSM 100202		WP_094729408.1
				OZG64999.1
	imperatoris	Tam1G		WP_033890859.1
				PLS24701.1
	indicum	ESL0197		PXY80266.1
		LMG 11587		AIC91911.1
	italicum	Rab10A		WP_095613610.1
				PAU68657.1
	kashiwanohense	JCM 15439		BAQ29181.1
		DSM 21854		KFI63074.1
		PV20-2		AIZ14614.1
	lemurum	DSM 28807		OZG60003.1
	longum	DJO10A		WP_010080666.1
		NCC2705		WP_007054288.1
	longum subsp. infantis	ATCC 15697		WP_012577443.1
	longum subsp. longum	BBMN68		WP_013410838.1
		JCM 1217		WP_013582766.1
	magnum	LMG 11591		WP_022859428.1
				KFI67867.1
	margollesii	Uis1B		WP_101616621.1
				PLS30958.1
	merycicum	LMG 11341		KFI70864.1
		DSM 6492		SHE34500.1
	minimum	LMG 11592		WP_022860673.1
				KFI72650.1
	mongoliense	BMONG18		WP_123644612.1
				ROT87394.1
		DSM 21395		WP_033512282.1
	moukalabense	GG01		WP_034875453.1
		DSM 27321		ETY71545.1
	myosotis	DSM 100196		WP_094668125.1
				OZG58183.1
	parmae	Uis4E		WP_034526112.1
				PLS27251.1
	primatium	TRE 1		WP_100510986.1
		TRE 1		PJM72883.1
	pseudocatenulatum	FHHMB OV1		ACI48575.1
		FHHMB OV17		ABY59652.1
		JCM 1200		ACV83796.1
		DSM 20438		WP_004222108.1
		IPLA36007		WP_034879627.1
	pseudocatenulatum CAG:263	-		CDC15246.1
	psychraerophilum	LMG 21775		WP_033496359.1
				KFI81191.1
	pullorum	LMG 21816		KFI84159.1
		DSM 20433		WP_033514643.1
	reuteri	DSM 23975		WP_044088221.1
	ruminantium	FHHMB OV4-1		ACV91931.1
		LMG 21811		WP_026646034.1
	saguini	DSM 23967		KFI92208.1
	scaligerum	TRE D		PJM80040.1
	scardovii	LMG 21589		WP_033519293.1
		981_BLON		WP_049185010.1
		JCM 12489		BAQ31543.1
	simiarum	TRI 7		WP_100513432.1
				PJM74739.1
	stellenboschense	DSM 23968		KFJ01206.1
	stercoris	DSM 24849		KFI98425.1
	thermacidophilum	JCM 11165		ACV83794.1
	thermacidophilum subsp. porcinum	LMG 21689		KFI99654.1
		DSM 17755		WP_015450595.1
	thermacidophilum subsp. thermacidophilum	LMG 21395		WP_029576714.1
				KFJ01583.1
	thermophilum	RBL67		AGH41337.1
	tissieri	DSM 100201		WP_094664426.1
				OZG56958.1
	tsurumiense	JCM 13495		WP_026641892.1
	vansinderenii	Tam10B		WP_093959510.1
				OXN01302.1
	xylocopae	XV2		WP_113853510.1
				RBP99300.1
	Bifidobacteriales bacterium 56_10	-		OKY92081.1

## Sheet: Phascolrctobacterium
Supplementary Table S3. Overall information about bacterial taxonomy annotated on NCBI database for qPCR-only primer design
Bacterial genus	Species name	Strain number	Target gene	NCBI protein acession
Phascolarctobacterium	faecium	JCM 30894	nusG	WP_021717069.1
		DSM 14760	nusG	RAS56312.1
	succinatutens	-	nusG	HAM92517.1
		-	nusG	OLA38411.1
		CAG:287	nusG	CDD10620.1
		YIT 12067	nusG	EFY05224.1
			nusG	WP_009145197.1
*nusG: transcription termination/anti-termination protein

## Sheet: Roseburia
Supplementary Table S3. Overall information about bacterial taxonomy annotated on NCBI database for qPCR-only primer design
Bacterial genus	Species name	Strain number	Target gene	NCBI protein acession
Roseburia	faecis	M72	nusG	WP_022044851.1
			nusG	CRL42786.1
		2789STDY5608863	nusG	CUN09417.1
	hominis	2789STDY5608834	nusG	CUN70335.1
			nusG	CUP45923.1
		AF22-12AC	nusG	RGS37146.1
		A2-183	nusG	AEN95316.1
	intestinalis	2789STDY5834960	nusG	WP_006855729.1
			nusG	CUN31086.1
		-	nusG	OLA57249.1
		AM43-11	nusG	RHA61228.1
		AM37-1AC	nusG	RHC13109.1
		AM22-21LB	nusG	RHG24518.1
		AF36-10AT	nusG	RHL99751.1
		AF31-21AC	nusG	RHN04225.1
		M50/1	nusG	CBL07998.1
		XB6B4	nusG	CBL12558.1
	inulinivorans	L1-83	nusG	WP_021923058.1
		CAG:15	nusG	CCY29208.1
*nusG: transcription termination/anti-termination protein
