# Supplementary material for: A qRT-PCR Method Capable of Quantifying Specific Microorganisms Compared to NGS-Based Metagenome Profiling Data
Source: Microorganisms. 2022 Jan 30;10(2):324. doi: 10.3390/microorganisms10020324 (PMC8875016; doi:10.3390/microorganisms10020324)
Supplement: Supplementary file 1 [file microorganisms-10-00324-s001.zip › Supplementary Table S4..xlsx]

## Sheet: Sheet2
Supplementary Table S4. Ct value measurment data of all 10-fold diluted mDNA samples targeted for the 16S V4 region
Sample ID	Target gene	*Cт value (10^-3)	Cт value (10^-2)	Cт value (10^-1)
Candidate 1	16S rRNA V4 region	26.2416	22.1707	19.2744
Candidate 2	16S rRNA V4 region	26.2846	22.4846	19.3788
Candidate 3	16S rRNA V4 region	26.0942	22.6605	19.0269
Candidate 4	16S rRNA V4 region	26.0055	22.7774	19.149
Candidate 5	16S rRNA V4 region	26.5787	22.0251	19.2301
Candidate 6	16S rRNA V4 region	26.5559	22.0699	19.1811
Candidate 7	16S rRNA V4 region	26.4658	22.0845	19.8025
Candidate 8	16S rRNA V4 region	27.3768	22.1086	19.5675
Candidate 9	16S rRNA V4 region	26.9211	22.2247	19.7462
Candidate 10	16S rRNA V4 region	26.7757	22.2648	19.8446
Candidate 11	16S rRNA V4 region	26.4609	22.3878	19.6294
Candidate 12	16S rRNA V4 region	26.9557	22.4274	19.3552
Candidate 13	16S rRNA V4 region	26.7898	22.4661	19.8502
Candidate 14	16S rRNA V4 region	26.495	22.5392	19.0448
Candidate 15	16S rRNA V4 region	26.716	22.5908	19.4502
Candidate 16	16S rRNA V4 region	27.0314	22.592	19.2019
Candidate 17	16S rRNA V4 region	26.5655	22.5935	18.7031
Candidate 18	16S rRNA V4 region	27.1286	22.6031	19.0028
Candidate 19	16S rRNA V4 region	26.9073	22.6645	18.9086
Candidate 20	16S rRNA V4 region	26.2612	22.7797	18.9957
Candidate 21	16S rRNA V4 region	26.6798	22.8328	19.2295
Candidate 22	16S rRNA V4 region	26.965	22.8548	19.6151
Candidate 23	16S rRNA V4 region	26.5791	22.9566	19.8856
Candidate 24	16S rRNA V4 region	26.9681	23.0313	19.503
Candidate 25	16S rRNA V4 region	27.3229	23.1052	19.3421
Candidate 26	16S rRNA V4 region	27.2196	23.1338	19.2878
Candidate 27	16S rRNA V4 region	26.9957	23.2722	19.2971
Candidate 28	16S rRNA V4 region	26.9038	23.287	19.0432
Candidate 29	16S rRNA V4 region	27.3657	23.314	19.9589
Candidate 30	16S rRNA V4 region	27.5533	23.3202	20.7246
Candidate 31	16S rRNA V4 region	27.5423	23.3539	18.6337
Candidate 32	16S rRNA V4 region	26.9512	23.4025	19.384
Candidate 33	16S rRNA V4 region	27.4629	23.4213	19.0264
Candidate 34	16S rRNA V4 region	27.37	23.476	19.0205
Candidate 35	16S rRNA V4 region	27.5594	23.4803	19.9808
Candidate 36	16S rRNA V4 region	27.1428	23.5196	19.1084
Candidate 37	16S rRNA V4 region	27.9445	23.5217	19.9685
Candidate 38	16S rRNA V4 region	26.9704	23.6654	20.1243
Candidate 39	16S rRNA V4 region	27.3794	23.6717	19.2459
Candidate 40	16S rRNA V4 region	27.1801	23.7032	18.3168
Candidate 41	16S rRNA V4 region	27.2788	23.714	19.9187
Candidate 42	16S rRNA V4 region	27.5319	23.73	19.964
Candidate 43	16S rRNA V4 region	27.7574	23.7653	19.6969
Candidate 44	16S rRNA V4 region	27.9305	23.8311	19.0705
Candidate 45	16S rRNA V4 region	27.9277	23.832	19.4043
Candidate 46	16S rRNA V4 region	27.4555	23.8372	19.6575
Candidate 47	16S rRNA V4 region	27.2798	23.8504	20.2722
Candidate 48	16S rRNA V4 region	27.0737	23.8557	19.2215
Candidate 49	16S rRNA V4 region	27.7671	23.8917	20.072
Candidate 50	16S rRNA V4 region	27.6225	23.9086	20.6884
Candidate 51	16S rRNA V4 region	27.0513	23.9788	19.6259
Candidate 52	16S rRNA V4 region	27.9012	23.9821	20.2072
Candidate 53	16S rRNA V4 region	27.9893	23.9936	20.0595
Candidate 54	16S rRNA V4 region	27.5882	23.0257	19.7483
Candidate 55	16S rRNA V4 region	27.4399	23.0743	19.7499
Candidate 56	16S rRNA V4 region	27.5785	23.0767	20.2004
Candidate 57	16S rRNA V4 region	26.9638	23.0932	20.6104
Candidate 58	16S rRNA V4 region	27.8994	23.0945	19.9136
Candidate 59	16S rRNA V4 region	27.2732	23.1029	20.6912
Candidate 60	16S rRNA V4 region	27.5361	23.125	19.7586
Candidate 61	16S rRNA V4 region	27.7514	23.1306	20.1479
Candidate 62	16S rRNA V4 region	27.271	23.1562	20.4876
Candidate 63	16S rRNA V4 region	27.4823	23.1644	19.6151
Candidate 64	16S rRNA V4 region	26.9393	23.1841	20.8247
Candidate 65	16S rRNA V4 region	27.2041	23.1878	20.0163
Candidate 66	16S rRNA V4 region	27.3675	23.235	20.1754
Candidate 67	16S rRNA V4 region	27.5645	23.2366	20.2305
Candidate 68	16S rRNA V4 region	27.29	23.2585	20.7047
Candidate 69	16S rRNA V4 region	28.0602	23.2626	19.9566
Candidate 70	16S rRNA V4 region	27.9597	23.2647	19.9656
Candidate 71	16S rRNA V4 region	27.9586	23.2653	20.0536
Candidate 72	16S rRNA V4 region	27.4265	23.2866	20.6131
Candidate 73	16S rRNA V4 region	27.5779	23.3036	19.9249
Candidate 74	16S rRNA V4 region	27.3543	23.3063	20.7691
Candidate 75	16S rRNA V4 region	27.6607	23.3094	19.8738
Candidate 76	16S rRNA V4 region	27.925	23.3468	20.159
Candidate 77	16S rRNA V4 region	27.1173	23.377	19.3683
Candidate 78	16S rRNA V4 region	27.3582	23.5128	20.0147
Candidate 79	16S rRNA V4 region	27.337	23.5441	20.8341
Candidate 80	16S rRNA V4 region	27.9944	23.5914	20.5194
Candidate 81	16S rRNA V4 region	27.8579	23.608	19.7557
Candidate 82	16S rRNA V4 region	27.8077	23.6679	20.3121
Candidate 83	16S rRNA V4 region	27.726	23.7111	19.9995
Candidate 84	16S rRNA V4 region	27.9637	23.761	20.327
Candidate 85	16S rRNA V4 region	28.024	23.7819	20.6451
Candidate 86	16S rRNA V4 region	27.426	23.8479	20.3031
Candidate 87	16S rRNA V4 region	27.9528	23.8676	19.874
Candidate 88	16S rRNA V4 region	27.2041	23.9616	20.372
Candidate 89	16S rRNA V4 region	27.1606	23.9679	20.9349
Candidate 90	16S rRNA V4 region	27.449	23.9817	21.7565
Candidate 91	16S rRNA V4 region	27.9198	24.1076	20.6238
Candidate 92	16S rRNA V4 region	27.3228	23.2167	21.2253
Candidate 93	16S rRNA V4 region	27.1238	23.254	21.2397
Candidate 94	16S rRNA V4 region	27.5152	23.2546	20.4927
Candidate 95	16S rRNA V4 region	27.9407	23.3831	19.827
Candidate 96	16S rRNA V4 region	27.6333	23.6012	19.0312
Candidate 97	16S rRNA V4 region	27.6242	23.6293	19.3901
Candidate 98	16S rRNA V4 region	27.6392	23.6343	20.7308
Candidate 99	16S rRNA V4 region	27.7898	23.8281	20.5168
Candidate 100	16S rRNA V4 region	27.3981	23.8762	19.6118
*Ct value: Cycle threshold value
