# Supplementary material for: A qRT-PCR Method Capable of Quantifying Specific Microorganisms Compared to NGS-Based Metagenome Profiling Data
Source: Microorganisms. 2022 Jan 30;10(2):324. doi: 10.3390/microorganisms10020324 (PMC8875016; doi:10.3390/microorganisms10020324)
Supplement: Supplementary file 1 [file microorganisms-10-00324-s001.zip › Supplementary Table S5.xlsx]

## Sheet: SILVA138v_Domain
Supplementary Table S5. Relative bacterial frequency data for 100 individuals measured by 16S metagenome sequencing
	Domain	Candidate 1	Candidate 2	Candidate 3	Candidate 4	Candidate 5	Candidate 6	Candidate 7	Candidate 8	Candidate 9	Candidate 10	Candidate 11	Candidate 12	Candidate 13	Candidate 14	Candidate 15	Candidate 16	Candidate 17	Candidate 18	Candidate 19	Candidate 20	Candidate 21	Candidate 22	Candidate 23	Candidate 24	Candidate 25	Candidate 26	Candidate 27	Candidate 28	Candidate 29	Candidate 30	Candidate 31	Candidate 32	Candidate 33	Candidate 34	Candidate 35	Candidate 36	Candidate 37	Candidate 38	Candidate 39	Candidate 40	Candidate 41	Candidate 42	Candidate 43	Candidate 44	Candidate 45	Candidate 46	Candidate 47	Candidate 48
0	Bacteria	1	1	1	1	1	1	1	1	1	1	1	1	1	1	1	1	1	1	1	1	1	1	1	1	1	1	1	1	1	1	1	1	1	1	1	1	1	1	1	1	1	1	1	1	1	1	1	1
[truncated: 52 more columns]

## Sheet: SILVA138v_Phylum
Supplementary Table S5. Relative bacterial frequency data for 100 individuals measured by 16S metagenome sequencing
	Domain	Phylum	Candidate 1	Candidate 2	Candidate 3	Candidate 4	Candidate 5	Candidate 6	Candidate 7	Candidate 8	Candidate 9	Candidate 10	Candidate 11	Candidate 12	Candidate 13	Candidate 14	Candidate 15	Candidate 16	Candidate 17	Candidate 18	Candidate 19	Candidate 20	Candidate 21	Candidate 22	Candidate 23	Candidate 24	Candidate 25	Candidate 26	Candidate 27	Candidate 28	Candidate 29	Candidate 30	Candidate 31	Candidate 32	Candidate 33	Candidate 34	Candidate 35	Candidate 36	Candidate 37	Candidate 38	Candidate 39	Candidate 40	Candidate 41	Candidate 42	Candidate 43	Candidate 44	Candidate 45	Candidate 46	Candidate 47
0	Bacteria	unidentified	0	0	0	0	0	0	0.000220548	0	1.32564e-05	0	0	0	6.65395e-05	0	0	0	0	0	0	0	0	0	0	0	0	0	0	0	0	0.00106815	0	0	4.58526e-05	2.27674e-05	0	0	0.00028356	0	0	4.3957e-05	0.000520717	0	0	0	3.35664e-05	0	0
1	Bacteria	Actinobacteriota	0.0074065	0.0255262	0.00365547	0.00225211	0.00777041	0.0559921	0.0020019	0.0240257	0.0231257	0.00470365	0.0252151	0.000327681	0.180987	0.00565706	0.00511795	0.0153517	0.00240231	0.00119043	0.00250935	0.00785639	0.000725225	0.000716493	0.00529875	0.00208796	0.0212412	0.0539425	0.011003	0	0.0111472	0.0011275	0.00538939	0.0146583	0.0103627	0.0127156	0.00224804	0.0111426	0.00426794	0.0199448	0.00418054	0.00896723	0.00277716	0.013807	0.0241286	0.0543003	0.0121175	0.0194057	0.0304385
2	Bacteria	Bacteroidota	0.5047	0.549886	0.40307	0.485666	0.613073	0.530073	0.674131	0.436764	0.437672	0.444516	0.478554	0.461784	0.379763	0.485302	0.498982	0.415599	0.613007	0.743706	0.534893	0.535966	0.492684	0.538131	0.585849	0.432478	0.397284	0.45784	0.523059	0.480033	0.574261	0.516868	0.349113	0.456309	0.54048	0.500137	0.561159	0.421021	0.598486	0.539395	0.588509	0.427394	0.559027	0.447275	0.561369	0.464572	0.48819	0.458404	0.589307
3	Bacteria	Campilobacterota	0.5047	0.549886	0.40307	0.485666	0.613073	0.530073	0.674131	0.436764	0.437672	0.444516	0.478554	0.461784	0.379763	0.485302	0.498982	0.415599	0.613007	0.743706	0.534893	0.535966	0.492684	0.538131	0.585849	0.432478	0.397284	0.45784	0.523059	0.480033	0.574261	0.516868	0.349113	0.456309	0.54048	0.500137	0.561159	0.421021	0.598486	0.539395	0.588509	0.427394	0.559027	0.447275	0.561369	0.464572	0.48819	0.458404	0.589307
4	Bacteria	Chloroflexi	0	0	0	0	0	8.47937e-05	0.000101792	0	0	0	0	0	0	0	0	7.9818e-05	0	0	1.86569e-05	0	0	0	0	0	0	0	0	0	0	0	0	0	4.58526e-05	0	0	0	0	0	0	0	0.000867862	0	0.000267158	0	0	0	0
5	Bacteria	Cyanobacteria	0	0	0	0	0	0	0	0	0	0	0	0	0	0	0	0	0	0	0	0	0	0	0	0	0	0	0	0	0	0	0	0	0	0	0	0	0	0	0	0	0	0	0	0	0	0	0
6	Bacteria	Desulfobacterota	0	0.000294946	0	0	0	0	8.48263e-05	7.1082e-05	0.00210776	0.000647291	0.00010454	0	0.000110899	0	0.000648754	6.6515e-05	0	0	0	0.00629356	0	0	5.85497e-05	0	5.68707e-05	9.29356e-05	0.017166	0	0	0	0.0016704	0	0.00111575	0	0	0.014903	0	0.000824786	0	0.0147476	0	0	0	0.000102357	0	0	0
7	Bacteria	Firmicutes	0.00191267	0	0.00221747	0.00455684	0.00281175	0.0133691	0.00108578	0.00805004	0	0	0.00494475	0.00819202	0.00978131	0.0393964	0.00702817	0.0132365	0.00105408	0	0.000988815	0.0323759	0.00341282	0.0102548	0.00184432	0.00437799	0.00790503	0.00623996	0.00482251	0.00499177	0.00057038	0.00433196	0.00813136	0.018231	0.00904825	0.00625534	0.00123051	0.00339124	0.00217396	0.00311919	0.00993576	0.0106156	0.00136378	0.00312708	0	0.00330101	0.0062993	0.00801431	0.0146394
8	Bacteria	Fusobacteriota	0.409921	0.379944	0.567794	0.4763	0.336385	0.314358	0.256616	0.515167	0.495569	0.518005	0.462444	0.528467	0.408109	0.458249	0.402317	0.48093	0.243198	0.180255	0.388679	0.375058	0.355232	0.400967	0.375494	0.549471	0.548191	0.355903	0.423301	0.499067	0.134324	0.456161	0.588421	0.449831	0.391383	0.431516	0.388746	0.51503	0.190291	0.371588	0.350789	0.452384	0.227256	0.501273	0.341456	0.431229	0.418562	0.411427	0.290704
9	Bacteria	Patescibacteria	0	0.00136748	0	3.15716e-05	0	0.00336348	0.000203583	0.000604197	0	0	0	0	0	0	0	0	0	0	0	0.000168955	0	0	0	0	0.0002417	0	0	0	0.14758	0	0.000126068	0.00500851	0	0	0	0	0.109011	0	0.00543471	8.7914e-05	0.00163654	0	0	0	0	0.0330906	1.68076e-05
10	Bacteria	Planctomycetota	0	0.000160879	0	9.47149e-05	5.5404e-05	0.00031091	0	0	1.98845e-05	0	0	0	0	0	0	0	0	0	0	0	0	0	0	0	5.68707e-05	0	0	0	9.91965e-05	0	0	0	0	0	0	0	5.08954e-05	0	0	0	0	6.83515e-05	0	0	0	0	1.68076e-05
11	Bacteria	Proteobacteria	0	0	0	0	0	0	0	0	0	0	0	0	0	0	0	0	0	0	0	0	0	0	0	0	0	0	0	0	0	0	0	0	0	0	0	0	0	0	0	0	0	0	0	0	0	0	0
12	Bacteria	Spirochaetota	0.0738209	0.0428208	0.0227795	0.0304877	0.0382287	0.0821085	0.0638912	0.0129014	0.0414924	0.0321272	0.0269296	0.0012288	0.010602	0.00931114	0.0316808	0.0516156	0.130804	0.0748482	0.0221457	0.0406125	0.147946	0.0450943	0.0313241	0.0115848	0.0250231	0.0481805	0.00743397	0.0159078	0.132018	0.0204433	0.0298465	0.0542923	0.0475186	0.0299163	0.0340283	0.03412	0.0953852	0.0464879	0.0411505	0.0210774	0.206402	0.0261103	0.0727794	0.0341616	0.070993	0.069659	0.0743399
13	Bacteria	Sumerlaeota	0	0	0	0	0	0	0.000712541	0	0	0	0	0	0	0	0	0	0	0	0	0	0	0	0	0	0	0	0	0	0	0	0	0	0	0	0	0	0	0	0	0	0	0	0	0	0	0	0
14	Bacteria	Sva0485	0	0	0	0	0	0	0	0	0	0	0	0	0	0	0	0	0	0	0	0	0	0	0	0	0	0	0	0	0	0	0	0	0	0	0	0	0	0	0	0	0	0	0	0	0	0	0
15	Bacteria	Synergistota	0	0	0	0	0	0	0	0	0	0	0	0	0	0	0	0	0	0	0	0	0	0	0	0	0	0	0	0	0	0	0	0	0	0	0	0	0	0	0	0	0	0	0	0	0	0	0
16	Bacteria	Verrucomicrobiota	0	0	0	0	0	0.000339175	0.000135722	0.000639738	0	0	0	0	0	0.000378942	0	0	0	0	0	0	0	0	0	0	0	0	0	0	0	0	0	0.000333901	0	0	0	0	5.08954e-05	0	0	0	0	0	0	0	0	0	0
[truncated: 53 more columns]

## Sheet: SILVA138v_Class
Supplementary Table S5. Relative bacterial frequency data for 100 individuals measured by 16S metagenome sequencing
	Domain	Phylum	Class	Candidate 1	Candidate 2	Candidate 3	Candidate 4	Candidate 5	Candidate 6	Candidate 7	Candidate 8	Candidate 9	Candidate 10	Candidate 11	Candidate 12	Candidate 13	Candidate 14	Candidate 15	Candidate 16	Candidate 17	Candidate 18	Candidate 19	Candidate 20	Candidate 21	Candidate 22	Candidate 23	Candidate 24	Candidate 25	Candidate 26	Candidate 27	Candidate 28	Candidate 29	Candidate 30	Candidate 31	Candidate 32	Candidate 33	Candidate 34	Candidate 35	Candidate 36	Candidate 37	Candidate 38	Candidate 39	Candidate 40	Candidate 41	Candidate 42	Candidate 43	Candidate 44	Candidate 45	Candidate 46
0	Bacteria	unidentified	unidentified	0	0	0	0	0	0	0.000220548	0	1.32564e-05	0	0	0	6.65395e-05	0	0	0	0	0	0	0	0	0	0	0	0	0	0	0	0	0.00106815	0	0	4.58526e-05	2.27674e-05	0	0	0.00028356	0	0	4.3957e-05	0.000520717	0	0	0	3.35664e-05	0
1	Bacteria	Actinobacteriota	Actinobacteria	0.00484271	0.0184207	0.00158583	0.00166277	0.00603903	0.054918	0.00149294	0.0163133	0.0208788	0.00455261	0.0124507	0.000327681	0.138136	0.00429016	0.000756879	0.0109484	0.00208364	0.00119043	0.00243472	0.00061246	0	0.000238831	0.0043034	0.00208796	0.0149001	0.0502383	0.0107592	0	0.00927487	0.000741774	0.000850957	0.0139905	0.00521192	0.0125619	0.00224804	0.0102199	0.00320641	0.0166007	0.00319115	0.00567045	0.00104143	0.0081851	0.0226803	0.0432201	0.00842517	0.0105849
2	Bacteria	Actinobacteriota	Coriobacteriia	0.00256379	0.00710551	0.00206964	0.000589337	0.00173137	0.00107405	0.000508958	0.0077124	0.00224695	0.000151035	0.0127644	0	0.0428514	0.0013669	0.00436107	0.00440329	0.000318674	0	7.46276e-05	0.00724393	0.000725225	0.000477662	0.000995345	0	0.00634108	0.00370415	0.000243737	0	0.00187233	0.000385722	0.00453843	0.000667802	0.00515078	0.00015368	0	0.000922786	0.00106153	0.00334413	0.000989395	0.00329678	0.00173572	0.00562191	0.00144828	0.0110801	0.00369231	0.00882079
3	Bacteria	Bacteroidota	Bacteroidia	0.5047	0.549886	0.40307	0.485666	0.613073	0.530073	0.674131	0.436764	0.437672	0.444516	0.478554	0.461784	0.379763	0.485302	0.498982	0.415599	0.613007	0.743706	0.534893	0.535966	0.492684	0.538131	0.585849	0.432478	0.397284	0.45784	0.523059	0.480033	0.574261	0.516868	0.349113	0.456309	0.54048	0.500137	0.561159	0.421021	0.598486	0.539395	0.588509	0.427394	0.559027	0.447275	0.561369	0.464572	0.48819	0.458404
4	Bacteria	Campilobacterota	Campylobacteria	0	0	0	0	0	8.47937e-05	0.000101792	0	0	0	0	0	0	0	0	7.9818e-05	0	0	1.86569e-05	0	0	0	0	0	0	0	0	0	0	0	0	0	4.58526e-05	0	0	0	0	0	0	0	0.000867862	0	0.000267158	0	0	0
5	Bacteria	Chloroflexi	Anaerolineae	0	0	0	0	0	0	0	0	0	0	0	0	0	0	0	0	0	0	0	0	0	0	0	0	0	0	0	0	0	0	0	0	0	0	0	0	0	0	0	0	0	0	0	0	0	0
6	Bacteria	Cyanobacteria	Cyanobacteriia	0	0.000294946	0	0	0	0	8.48263e-05	7.1082e-05	0.00014582	0.000151035	0.00010454	0	0.000110899	0	0	6.6515e-05	0	0	0	0	0	0	5.85497e-05	0	5.68707e-05	9.29356e-05	0	0	0	0	9.45507e-05	0	0.00111575	0	0	0	0	0.000824786	0	0.000549463	0	0	0	0.000102357	0	0
7	Bacteria	Cyanobacteria	Vampirivibrionia	0	0	0	0	0	0	0	0	0.00196194	0.000496256	0	0	0	0	0.000648754	0	0	0	0	0.00629356	0	0	0	0	0	0	0.017166	0	0	0	0.00157585	0	0	0	0	0.014903	0	0	0	0.0141981	0	0	0	0	0	0
8	Bacteria	Desulfobacterota	Desulfobulbia	0	0	0	0	0	0	0	0	0	0	0	0	0	0	0	0	0	0	0	0	0	0	0	0	0	0	0	0	0	0	0	0	0	0	0	0	0	0	0	0	0	0	0	0	0	0
9	Bacteria	Desulfobacterota	Desulfovibrionia	0.00191267	0	0.00221747	0.00455684	0.00281175	0.0133691	0.00108578	0.00805004	0	0	0.00494475	0.00819202	0.00978131	0.0393964	0.00702817	0.0132365	0.00105408	0	0.000988815	0.0323759	0.00341282	0.0102548	0.00184432	0.00437799	0.00790503	0.00623996	0.00482251	0.00499177	0.00057038	0.00433196	0.00813136	0.018231	0.00904825	0.00625534	0.00123051	0.00339124	0.00217396	0.00311919	0.00993576	0.0106156	0.00136378	0.00312708	0	0.00330101	0.0062993	0.00801431
10	Bacteria	Firmicutes	unidentified	0	0	0	0	0	0	0	0	0	0	0	0	0	0	0	0	0	0	0	0	0	0	0	0	0	0	0	0	0	0	0	0	0	0	0	0	0	0	0	0	0	0	2.81219e-05	0	0	0
11	Bacteria	Firmicutes	Bacilli	0.0241729	0.0116369	0.0202932	0.0159226	0.00437691	0.00997739	0.0124525	0.0241324	0.0333464	0.0201523	0.0825031	0.00868354	0.012953	0.00542699	0.0153719	0.0309428	0.00487817	0.00527576	0.0035075	0.0128405	0.0292223	0.0174794	0.00382037	0.00626389	0.0101514	0.0090413	0.0136841	0.0114098	0.010428	0.0232324	0.0180277	0.00530903	0.010485	0.0347601	0.00222438	0.00729001	0.00199219	0.0366805	0.00557406	0.0259346	0.0792482	0.0265717	0.0192916	0.00803501	0.0104615	0.0273444
12	Bacteria	Firmicutes	Clostridia	0.342246	0.304035	0.513553	0.421113	0.319016	0.205427	0.235291	0.47378	0.455787	0.474356	0.364072	0.510363	0.387748	0.427636	0.353553	0.440462	0.223783	0.17364	0.359714	0.348659	0.31863	0.366322	0.367356	0.417391	0.519969	0.330081	0.3979	0.396928	0.0677636	0.406462	0.556179	0.360346	0.353218	0.367539	0.347666	0.472305	0.0538328	0.324276	0.314279	0.395943	0.0771157	0.457921	0.260887	0.398193	0.403625	0.367146
13	Bacteria	Firmicutes	Incertae_Sedis	0	0	0	7.36672e-05	0	0	0	0.000231017	0	0	0	0	0.000133079	0	0	0	0	0	0	0.000190074	0	0	0	0	0	0	0	0	0	0	0.000157585	0	0	0.000233366	0	0	0	0.000104973	0	0.000241764	0	0	0	0	0	0
14	Bacteria	Firmicutes	Negativicutes	0.0432589	0.0642714	0.0339475	0.0391909	0.0129922	0.0989542	0.00887283	0.0170242	0.00643596	0.0234967	0.0158692	0.00942082	0.00727499	0.0251861	0.0333928	0.00952495	0.0145365	0.00133923	0.0254573	0.0133685	0.00738023	0.017166	0.00431804	0.125817	0.0180707	0.0167815	0.0117168	0.0907296	0.0561328	0.0264665	0.0140565	0.0841764	0.0276797	0.0289601	0.0388556	0.035435	0.134466	0.0105273	0.030936	0.0302644	0.0708919	0.0167803	0.0612495	0.0250006	0.00447552	0.0169359
15	Bacteria	Firmicutes	uncultured	0.00024417	0	0	0	0	0	0	0	0	0	0	0	0	0	0	0	0	0	0	0	0	0	0	0	0	0	0	0	0	0	0	0	0	2.27674e-05	0	0	0	0	0	0	0	0	0	0	0	0
16	Bacteria	Fusobacteriota	Fusobacteriia	0	0.00136748	0	3.15716e-05	0	0.00336348	0.000203583	0.000604197	0	0	0	0	0	0	0	0	0	0	0	0.000168955	0	0	0	0	0.0002417	0	0	0	0.14758	0	0.000126068	0.00500851	0	0	0	0	0.109011	0	0.00543471	8.7914e-05	0.00163654	0	0	0	0	0.0330906
17	Bacteria	Patescibacteria	Saccharimonadia	0	0.000160879	0	9.47149e-05	5.5404e-05	0.00031091	0	0	1.98845e-05	0	0	0	0	0	0	0	0	0	0	0	0	0	0	0	5.68707e-05	0	0	0	9.91965e-05	0	0	0	0	0	0	0	5.08954e-05	0	0	0	0	6.83515e-05	0	0	0	0
18	Bacteria	Planctomycetota	Phycisphaerae	0	0	0	0	0	0	0	0	0	0	0	0	0	0	0	0	0	0	0	0	0	0	0	0	0	0	0	0	0	0	0	0	0	0	0	0	0	0	0	0	0	0	0	0	0	0
19	Bacteria	Proteobacteria	Alphaproteobacteria	0.0282017	0	0	0	0	0	0	0	0	0	0	0	4.43597e-05	0	0	0.0310891	0.063073	0	0	0	0	0	8.78246e-05	0	0	0	0	0	0	0	0.00091399	0.00290494	0.000473811	0	0	0	0	0.00130466	0	0	0	0	0	0	0.0293035	0
20	Bacteria	Proteobacteria	Gammaproteobacteria	0.0456192	0.0428208	0.0227795	0.0304877	0.0382287	0.0821085	0.0638912	0.0129014	0.0414924	0.0321272	0.0269296	0.0012288	0.0105576	0.00931114	0.0316808	0.0205265	0.0677305	0.0748482	0.0221457	0.0406125	0.147946	0.0450943	0.0312363	0.0115848	0.0250231	0.0481805	0.00743397	0.0159078	0.132018	0.0204433	0.0289325	0.0513874	0.0470448	0.0299163	0.0340283	0.03412	0.0953852	0.0451833	0.0411505	0.0210774	0.206402	0.0261103	0.0727794	0.0341616	0.0416895	0.069659
21	Bacteria	Spirochaetota	Brachyspirae	0	0	0	0	0	0	0.000712541	0	0	0	0	0	0	0	0	0	0	0	0	0	0	0	0	0	0	0	0	0	0	0	0	0	0	0	0	0	0	0	0	0	0	0	0	0	0	0
22	Bacteria	Spirochaetota	Spirochaetia	0	0	0	0	0	0	0	0	0	0	0	0	0	0	0	0	0	0	0	0	0	0	0	0	0	0	0	0	0	0	0	0	0	0	0	0	0	0	0	0	0	0	0	0	0	0
23	Bacteria	Sumerlaeota	Sumerlaeia	0	0	0	0	0	0	0	0	0	0	0	0	0	0	0	0	0	0	0	0	0	0	0	0	0	0	0	0	0	0	0	0	0	0	0	0	0	0	0	0	0	0	0	0	0	0
24	Bacteria	Sva0485	Sva0485	0	0	0	0	0	0	0	0	0	0	0	0	0	0	0	0	0	0	0	0	0	0	0	0	0	0	0	0	0	0	0	0	0	0	0	0	0	0	0	0	0	0	0	0	0	0
25	Bacteria	Synergistota	Synergistia	0	0	0	0	0	0.000339175	0.000135722	0.000639738	0	0	0	0	0	0.000378942	0	0	0	0	0	0	0	0	0	0	0	0	0	0	0	0	0	0.000333901	0	0	0	0	5.08954e-05	0	0	0	0	0	0	0	0	0
26	Bacteria	Verrucomicrobiota	Chlamydiae	0	0	0	0	0	0	0	0	0	0	0	0	0	0	0	0	0	0	0	0	0	0	0	0	0	0	0	0	0	0	0	0	0	0	0	0	0	0	0	0	0	0	0	0	0	0
27	Bacteria	Verrucomicrobiota	Lentisphaeria	0	0	0.000147832	0.000389384	0.000637146	0	0	0	0	0	0.00180855	0	0.00212926	0.00170524	0.000126147	0	0.000294161	0	0	0.00166843	0	0.0042691	0.000131737	0	0	0.00203131	0	0	0	0	0.00236377	0	0	0	0	0.000392184	0	0	0	0.00239566	0.000148776	0.000427197	0	0.000102357	0.000581818	0
28	Bacteria	Verrucomicrobiota	Verrucomicrobiae	0.00223823	0	0.000335981	0.000221001	0.00103882	0	0.000814332	0.00177705	0	0	0	0	0.00845052	0	0.0540989	0.0231206	0.00924156	0	0.0507654	0	0	0.000567223	0	0	0	0.075769	0.013214	0	0	0	0.014939	0.0013356	0	0.0194376	0.012589	0	0	0.0186402	0	0.0622871	0	0.00791169	0	0.0122316	0.00322238	0
[truncated: 54 more columns]

## Sheet: SILVA138v_Order
Supplementary Table S5. Relative bacterial frequency data for 100 individuals measured by 16S metagenome sequencing
	Domain	Phylum	Class	Order	Candidate 1	Candidate 2	Candidate 3	Candidate 4	Candidate 5	Candidate 6	Candidate 7	Candidate 8	Candidate 9	Candidate 10	Candidate 11	Candidate 12	Candidate 13	Candidate 14	Candidate 15	Candidate 16	Candidate 17	Candidate 18	Candidate 19	Candidate 20	Candidate 21	Candidate 22	Candidate 23	Candidate 24	Candidate 25	Candidate 26	Candidate 27	Candidate 28	Candidate 29	Candidate 30	Candidate 31	Candidate 32	Candidate 33	Candidate 34	Candidate 35	Candidate 36	Candidate 37	Candidate 38	Candidate 39	Candidate 40	Candidate 41	Candidate 42	Candidate 43	Candidate 44	Candidate 45
0	Bacteria	unidentified	unidentified	unidentified	0	0	0	0	0	0	0.000220548	0	1.32564e-05	0	0	0	6.65395e-05	0	0	0	0	0	0	0	0	0	0	0	0	0	0	0	0	0.00106815	0	0	4.58526e-05	2.27674e-05	0	0	0.00028356	0	0	4.3957e-05	0.000520717	0	0	0	3.35664e-05
1	Bacteria	Actinobacteriota	Actinobacteria	Actinomycetales	0	0	0	0	6.9255e-05	0	5.08958e-05	0	0	0	0	0	0	0	0	0	0	0	0	0	0	0	0	0	0	0	0	0	0	0	0	0	0	0	0	0	0	0	0	0	0	0.000102527	0	0	0
2	Bacteria	Actinobacteriota	Actinobacteria	Bifidobacteriales	0.00484271	0.0183134	0.00158583	0.00156806	0.00596978	0.054918	0.00144205	0.0163133	0.0206534	0.00379744	0.0124507	0.000327681	0.138136	0.00429016	0.000756879	0.0107222	0.00208364	0.00119043	0.00243472	0.000401267	0	0	0.0043034	0.00208796	0.0149001	0.0502383	0.0107592	0	0.00889049	0.000741774	0.000661855	0.0139905	0.00521192	0.0124367	0.00224804	0.0102199	0.00320641	0.0165407	0.00319115	0.00567045	0	0.00808257	0.0226803	0.0432201	0.00842517
3	Bacteria	Actinobacteriota	Actinobacteria	Corynebacteriales	0	0	0	0	0	0	0	0	0	0	0	0	0	0	0	0	0	0	0	0	0	0	0	0	0	0	0	0	0	0	0	0	0	0	0	0	0	0	0	0	0	0	0	0	0
4	Bacteria	Actinobacteriota	Actinobacteria	Micrococcales	0	0.000107253	0	9.47149e-05	0	0	0	0	0.000225358	0.000755173	0	0	0	0	0	0.000226151	0	0	0	0.000211193	0	0.000238831	0	0	0	0	0	0	0.000384386	0	0.000189101	0	0	0.000125221	0	0	0	5.99844e-05	0	0	0.00104143	0	0	0	0
5	Bacteria	Actinobacteriota	Coriobacteriia	Coriobacteriales	0.00256379	0.00710551	0.00206964	0.000589337	0.00173137	0.00107405	0.000508958	0.0077124	0.00224695	0.000151035	0.0127644	0	0.0428514	0.0013669	0.00436107	0.00440329	0.000318674	0	7.46276e-05	0.00724393	0.000725225	0.000477662	0.000995345	0	0.00634108	0.00370415	0.000243737	0	0.00187233	0.000385722	0.00453843	0.000667802	0.00515078	0.00015368	0	0.000922786	0.00106153	0.00334413	0.000989395	0.00329678	0.00173572	0.00562191	0.00144828	0.0110801	0.00369231
6	Bacteria	Bacteroidota	Bacteroidia	Bacteroidales	0.5047	0.549886	0.402908	0.485456	0.613073	0.530073	0.674131	0.436764	0.437672	0.444516	0.478554	0.461784	0.379763	0.485302	0.498982	0.415599	0.613007	0.743706	0.534893	0.535966	0.492684	0.538131	0.585849	0.432478	0.397284	0.453499	0.520047	0.480033	0.574261	0.516868	0.349018	0.456309	0.54048	0.500137	0.561159	0.421021	0.598486	0.538405	0.588509	0.427394	0.559027	0.447275	0.561369	0.464572	0.48819
7	Bacteria	Bacteroidota	Bacteroidia	Cytophagales	0	0	0	0	0	0	0	0	0	0	0	0	0	0	0	0	0	0	0	0	0	0	0	0	0	0	0	0	0	0	0	0	0	0	0	0	0	0	0	0	0	0	0	0	0
8	Bacteria	Bacteroidota	Bacteroidia	Flavobacteriales	0	0	0.000161271	0.000210478	0	0	0	0	0	0	0	0	0	0	0	0	0	0	0	0	0	0	0	0	0	0.00434142	0.00301189	0	0	0	9.45507e-05	0	0	0	0	0	0	0.000989743	0	0	0	0	0	0	0
9	Bacteria	Campilobacterota	Campylobacteria	Campylobacterales	0	0	0	0	0	8.47937e-05	0.000101792	0	0	0	0	0	0	0	0	7.9818e-05	0	0	1.86569e-05	0	0	0	0	0	0	0	0	0	0	0	0	0	4.58526e-05	0	0	0	0	0	0	0	0.000867862	0	0.000267158	0	0
10	Bacteria	Chloroflexi	Anaerolineae	Anaerolineales	0	0	0	0	0	0	0	0	0	0	0	0	0	0	0	0	0	0	0	0	0	0	0	0	0	0	0	0	0	0	0	0	0	0	0	0	0	0	0	0	0	0	0	0	0
11	Bacteria	Cyanobacteria	Cyanobacteriia	Chloroplast	0	0.000294946	0	0	0	0	8.48263e-05	7.1082e-05	0.00014582	0.000151035	0.00010454	0	0.000110899	0	0	6.6515e-05	0	0	0	0	0	0	5.85497e-05	0	5.68707e-05	9.29356e-05	0	0	0	0	9.45507e-05	0	0.00111575	0	0	0	0	0.000824786	0	0.000549463	0	0	0	0.000102357	0
12	Bacteria	Cyanobacteria	Vampirivibrionia	Gastranaerophilales	0	0	0	0	0	0	0	0	0.00196194	0.000496256	0	0	0	0	0.000648754	0	0	0	0	0.00629356	0	0	0	0	0	0	0.017166	0	0	0	0.00157585	0	0	0	0	0.014903	0	0	0	0.0141981	0	0	0	0	0
13	Bacteria	Desulfobacterota	Desulfobulbia	Desulfobulbales	0	0	0	0	0	0	0	0	0	0	0	0	0	0	0	0	0	0	0	0	0	0	0	0	0	0	0	0	0	0	0	0	0	0	0	0	0	0	0	0	0	0	0	0	0
14	Bacteria	Desulfobacterota	Desulfovibrionia	Desulfovibrionales	0.00191267	0	0.00221747	0.00455684	0.00281175	0.0133691	0.00108578	0.00805004	0	0	0.00494475	0.00819202	0.00978131	0.0393964	0.00702817	0.0132365	0.00105408	0	0.000988815	0.0323759	0.00341282	0.0102548	0.00184432	0.00437799	0.00790503	0.00623996	0.00482251	0.00499177	0.00057038	0.00433196	0.00813136	0.018231	0.00904825	0.00625534	0.00123051	0.00339124	0.00217396	0.00311919	0.00993576	0.0106156	0.00136378	0.00312708	0	0.00330101	0.0062993
15	Bacteria	Firmicutes	unidentified	unidentified	0	0	0	0	0	0	0	0	0	0	0	0	0	0	0	0	0	0	0	0	0	0	0	0	0	0	0	0	0	0	0	0	0	0	0	0	0	0	0	0	0	0	2.81219e-05	0	0
16	Bacteria	Firmicutes	Bacilli	unidentified	0	0	0	0	0	0	0	0	0	0	0	0	0	0	0	0	0	0	0	0	0	0	0	0	0	0	0	0	0	0	0	0	0	0	0	0	0	0	0	0	0	0	0	0	0
17	Bacteria	Firmicutes	Bacilli	Acholeplasmatales	0	0	0	0	0	0	0	0	0	0	0	0	0	0	0	0	0	0	0	0	0	0.00283612	0	0	0	0	0	0	4.95983e-05	0	0	0	0	0	0	0	0	0	0	0	0	0	0	0	0
18	Bacteria	Firmicutes	Bacilli	Bacillales	0	0	0	0	0	0	0	0	0	6.47291e-05	0	0	4.43597e-05	0	0	0	0	0	0	0	0	0	0	0	0	0	0	0	0	0	0	0	0	0	0	4.61393e-05	0	0	0	0	0	0	0	0	0
19	Bacteria	Firmicutes	Bacilli	Erysipelotrichales	0.0214463	0.00552353	0.0116249	0.00994507	0.00261784	0.0044658	0.00144205	0.00932952	0.0195531	0.0143267	0.0815622	0.00245761	0.00789602	0.00351874	0.0141825	0.0084208	0.00247585	0.00340895	0.000708962	0.0122914	0.0268333	0.00940397	0.00276647	0.00498417	0.00484823	0.00493886	0.00518811	0.00850247	0.0084069	0.00732872	0.0134892	0.00467461	0.00424901	0.0187888	0.00222438	0.00399105	0.000632557	0.0216094	0.00493304	0.0142421	0.0113814	0.0197365	0.0115722	0.0026101	0.0102713
20	Bacteria	Firmicutes	Bacilli	Izemoplasmatales	0	0	0	0	0	0	0	0.0106801	0	0	0	0	0	0	0	0	0	0	0	0	0.000255962	0.000373173	0	0	0	0	0	0	0	0	0.00144978	0	0	0.0121066	0	0	0	0	0	0.00206598	0	0	0	0	0
21	Bacteria	Firmicutes	Bacilli	Lactobacillales	0.00272657	0.00611342	0.00866831	0.00597756	0.000470934	0.00551159	0.00985681	0.00115508	0.00949818	0.00440158	0.000940862	0.00188416	0.0048352	0.00190824	0.000738859	0.0224555	0.000196107	0.00182622	0.00012127	0.000443506	0.00183439	0.00228382	0.000117099	0.00127972	0.00530319	0.000743485	0.00767771	0.00142622	0.00181034	0.0159036	0.00040972	0.000634412	0.00136029	0.00291422	0	0.00244538	0.00135963	0.0150711	0.000641017	0.000659355	0.0677428	0.00683515	0.00759291	0.00542491	7.83217e-05
22	Bacteria	Firmicutes	Bacilli	Mycoplasmatales	0	0	0	0	0	0	0	0	0	0	0	0	0	0	0	0	0	0	0	0.000105597	0	0	0	0	0	0	0	0	0	0	0	0	0	0	0	0	0	0	0	0	0	0	0	0	0
23	Bacteria	Firmicutes	Bacilli	RF39	0	0	0	0	0.00128814	0	0.00105185	0.00296768	0.00429506	0.00135931	0	0.00434177	0.000177439	0	0.000450524	6.6515e-05	0.00220621	0	0.00267726	0	0.000298622	0.00250772	0.000936796	0	0	0.00335896	0.000818259	0.00148108	0	0	0.00267894	0	0.00487566	0.000950538	0	0.000807438	0	0	0	0.00896723	0	0	0	0	0.000111888
24	Bacteria	Firmicutes	Bacilli	Staphylococcales	0	0	0	0	0	0	0.000101792	0	0	0	0	0	0	0	0	0	0	4.05828e-05	0	0	0	7.46347e-05	0	0	0	0	0	0	0.000161194	0	0	0	0	0	0	0	0	0	0	0	0.00012398	0	0.000126548	0	0
25	Bacteria	Firmicutes	Clostridia	unidentified	0	0	0	2.10478e-05	0.000166212	0	0	0	0	0.000302069	0	0	0.000133079	0	0.000144168	0	9.80536e-05	0	0	0	0	0	0	0	0	0	0	0	0	0	9.45507e-05	0	0	6.83021e-05	0	0	0	0	0	4.3957e-05	0	0	0	0.000255892	6.71329e-05
26	Bacteria	Firmicutes	Clostridia	Caldicoprobacterales	0	0	0	0	0	0	0	0	0	0	0	0	0	0	0	0	0	0	0	0	0	0	0	0	0	0	0	0	0	0	0	0	0	0	0	0	0	0	0	0	0	0	0	0	0
27	Bacteria	Firmicutes	Clostridia	Christensenellales	0.0194115	0.000884837	0.000860111	0.00131548	0.00623295	0	0.00154384	0.0560482	0.00159739	0.023173	0.00323029	0.00417793	0.0508584	0.00579239	0.0305095	0.00462944	0.00323577	0	0.0496646	0.00061246	0.00349814	0.00301524	0.00759683	0.000942951	0.00174877	0.00118161	0.0482251	0.00987383	0	0.00884194	0.0191938	0	0.0165834	0.00947692	0.000946544	0.00675941	0	0.00602843	0.000167222	0.0149454	0	0.00847559	0	0.0607232	0.0225455
28	Bacteria	Firmicutes	Clostridia	Clostridia	0	0	0	0	0	0	0	0.000266558	0	0	0	0	0	0	0	0.000319272	0	0	0	0	0	0	0	0	0	0	0	0	0	0	0	0	0	0	0	0	0	0	0	0	0	0	0	0	0
29	Bacteria	Firmicutes	Clostridia	Clostridia_UCG-014	0	0.019091	0	0	0.00322728	0	0.00666735	0.0468075	0.0547819	0.00791853	0	0.07594	0.00175221	0.00102856	0.0177867	0.00123718	0.0197088	0	0.0216606	0	0.00776417	0.0155837	0.0187652	0.00336768	0	0	0.0082	0	0	0	0.038293	0	0.00119217	0.00155387	0.00899217	0.00117655	0	0.000179953	0	0.0280226	0	0	0	0.00588551	0.0328168
30	Bacteria	Firmicutes	Clostridia	Clostridia_vadinBB60_group	0.000325561	0	0.000309102	0	0.00109423	0	0.000458062	0.019281	0.000914689	0	0.000240442	0.00147456	0.0271925	0.00437136	0.00450524	0	0.000637349	0	4.66422e-05	0.00031679	0.00776417	0.00259729	0.000687959	0	0.00663965	0.00102229	0.00362123	0	0	0	0.00601973	0.000701192	0.00181882	0.0100575	0.000283963	0.000299905	0	0.00376402	0.00135171	0.0167696	0	0.00193093	0	0.0018936	0.00223776
31	Bacteria	Firmicutes	Clostridia	Clostridiales	0	0	0	0.00302035	0	0	0	0	0.0115927	0.000366798	0	0.00294913	8.87193e-05	0.000351874	0	0	0	0.000689907	0.00752806	0	0	0.000865762	0	0.00161649	0.000639795	0.00357138	0.000243737	0.0211739	0	0.000534077	0.000220618	0	0	0.000950538	0.00205873	0	0	0.000209945	9.7546e-05	0.000373635	0	0.000256318	8.43656e-05	0	0.000313287
32	Bacteria	Firmicutes	Clostridia	Eubacteriales	0	0	0	0	0	0	0	0	0	0	0	0	0	0	0	0	0	2.70552e-05	0	0.000274551	0	0	0	0	0	0	0	0	0	0	0	0	0	0	0	0	0	0	0	0	0	3.41758e-05	0	0	0
33	Bacteria	Firmicutes	Clostridia	Lachnospirales	0.0907093	0.0763641	0.16365	0.167835	0.0909041	0.114641	0.0929696	0.1465	0.15781	0.233694	0.129358	0.163431	0.0851927	0.127392	0.0881404	0.128321	0.111879	0.147437	0.155766	0.178205	0.106395	0.0854268	0.115489	0.234189	0.0737471	0.113873	0.0885983	0.204498	0.0584763	0.110346	0.0977655	0.153561	0.13201	0.121971	0.0969971	0.175445	0.0400038	0.0968598	0.124302	0.135893	0.0534603	0.0668307	0.172232	0.0618747	0.105757
34	Bacteria	Firmicutes	Clostridia	Monoglobales	0.00272657	0.00608661	0.00198901	0.00224159	0.00271479	0.00392877	0.000559853	0.00559771	0.000596536	0.00504887	0.00426524	0.0141722	0.000487956	0.000717282	0.00104521	0.00163627	0.000661862	0	0.000942173	0.000253432	0.000682565	0.000865762	0.000102462	0	0.000312789	0.000464678	0.000835669	0.00219419	0	0.0132332	0.00330928	0.00233731	0.00108518	0.00576015	0.00153813	0.00101506	0.000705265	0.00550357	0.00465434	0.00600013	0.000297553	0.000341758	0.00441514	0.000358249	0.00250629
35	Bacteria	Firmicutes	Clostridia	Oscillospirales	0.228421	0.201341	0.344958	0.244449	0.213305	0.0862352	0.131939	0.197821	0.227989	0.201005	0.225096	0.24445	0.216231	0.285235	0.210106	0.303242	0.0776585	0.0245661	0.123621	0.16604	0.189881	0.254579	0.223645	0.17714	0.436042	0.209676	0.247149	0.156171	0.00830771	0.27235	0.38687	0.203479	0.197013	0.21563	0.236021	0.286133	0.0130728	0.211505	0.182759	0.19185	0.0233083	0.378445	0.0833251	0.26536	0.235323
36	Bacteria	Firmicutes	Clostridia	Peptococcales	0	0	0	0.000105239	0	0	0.000288409	0.000159935	0	0.00250286	0.000742235	0.00311297	0.000909373	0.000162404	0	0	0.000269647	0	0.000438437	0	0.000511924	0.000432881	0.000219561	0	0	0	0	0	0	0	0.0018595	0	0.000275116	0.000506574	0	0.000346045	0	0	0	0.000175828	0	6.83515e-05	0	0.000332659	0.000861538
37	Bacteria	Firmicutes	Clostridia	Peptostreptococcales-Tissierellales	0.000651121	0.000268132	0.00178742	0.00212582	0.000886463	0.00062182	0.000865228	0.000302099	0.000503742	0.000345222	0.00113949	0.000655362	0.00487956	0.00258492	0.00131553	0.00107754	0.00963377	0.000919876	4.66422e-05	0.00295671	0.00213301	0.00295553	0.000848971	0.000134707	0.000838843	0.000292083	0.00102718	0.003017	0.000979566	0.00115717	0.00255287	0.000267121	0.00324025	0.00154249	0.000828226	0.00113041	5.08954e-05	0.000224942	0.00094759	0.00186817	4.95921e-05	0.00153791	0.000829595	0.00150976	0.0011972
38	Bacteria	Firmicutes	Clostridia	uncultured	0	0	0	0	0.000484785	0	0	0.000995149	0	0	0	0	2.21798e-05	0	0	0	0	0	0	0	0	0	0	0	0	0	0	0	0	0	0	0	0	2.27674e-05	0	0	0	0	0	0	0	0	0	0	0
39	Bacteria	Firmicutes	Incertae_Sedis	DTU014	0	0	0	7.36672e-05	0	0	0	0.000231017	0	0	0	0	0.000133079	0	0	0	0	0	0	0.000190074	0	0	0	0	0	0	0	0	0	0	0.000157585	0	0	0.000233366	0	0	0	0.000104973	0	0.000241764	0	0	0	0	0
40	Bacteria	Firmicutes	Negativicutes	Acidaminococcales	0	0.0637351	0.0230886	0.0391488	0.00454313	0.0972866	0.00466545	0.0170242	0.000861663	0	0.00228943	0	0	0.00392475	0.0331766	0	0.000661862	0	0.024879	0.0115523	0.000255962	0.0134044	7.31872e-05	0.125817	0	0	0.00915754	0.0746023	0.056046	0.013708	0.0121025	0.0840429	0.0239656	0.0280494	0.00106486	0.00286064	0	0.000314918	0	0.0261544	0.000272757	0.00210181	0	0.0139205	0.000548252
41	Bacteria	Firmicutes	Negativicutes	Veillonellales-Selenomonadales	0.0432589	0.000536265	0.0108589	4.20955e-05	0.0084491	0.00166761	0.00420738	0	0.0055743	0.0234967	0.0135798	0.00942082	0.00727499	0.0212613	0.000216251	0.00952495	0.0138746	0.00133923	0.000578364	0.00181626	0.00712427	0.00376159	0.00424485	0	0.0180707	0.0167815	0.00255924	0.0161273	8.67969e-05	0.0127585	0.00195405	0.00013356	0.00371406	0.000910695	0.0377908	0.0325743	0.134466	0.0102123	0.030936	0.00410998	0.0706192	0.0146785	0.0612495	0.0110801	0.00392727
42	Bacteria	Firmicutes	uncultured	uncultured	0.00024417	0	0	0	0	0	0	0	0	0	0	0	0	0	0	0	0	0	0	0	0	0	0	0	0	0	0	0	0	0	0	0	0	2.27674e-05	0	0	0	0	0	0	0	0	0	0	0
43	Bacteria	Fusobacteriota	Fusobacteriia	Fusobacteriales	0	0.00136748	0	3.15716e-05	0	0.00336348	0.000203583	0.000604197	0	0	0	0	0	0	0	0	0	0	0	0.000168955	0	0	0	0	0.0002417	0	0	0	0.14758	0	0.000126068	0.00500851	0	0	0	0	0.109011	0	0.00543471	8.7914e-05	0.00163654	0	0	0	0
44	Bacteria	Patescibacteria	Saccharimonadia	Saccharimonadales	0	0.000160879	0	9.47149e-05	5.5404e-05	0.00031091	0	0	1.98845e-05	0	0	0	0	0	0	0	0	0	0	0	0	0	0	0	5.68707e-05	0	0	0	9.91965e-05	0	0	0	0	0	0	0	5.08954e-05	0	0	0	0	6.83515e-05	0	0	0
45	Bacteria	Planctomycetota	Phycisphaerae	MSBL9	0	0	0	0	0	0	0	0	0	0	0	0	0	0	0	0	0	0	0	0	0	0	0	0	0	0	0	0	0	0	0	0	0	0	0	0	0	0	0	0	0	0	0	0	0
46	Bacteria	Proteobacteria	Alphaproteobacteria	Caulobacterales	0	0	0	0	0	0	0	0	0	0	0	0	0	0	0	0	0	0	0	0	0	0	0	0	0	0	0	0	0	0	0	0	0	0	0	0	0	0	0	0	0	0	0	0	0
47	Bacteria	Proteobacteria	Alphaproteobacteria	Kiloniellales	0	0	0	0	0	0	0	0	0	0	0	0	0	0	0	0	0	0	0	0	0	0	0	0	0	0	0	0	0	0	0	0	0	0	0	0	0	0	0	0	0	0	0	0	0
48	Bacteria	Proteobacteria	Alphaproteobacteria	Rhizobiales	0	0	0	0	0	0	0	0	0	0	0	0	2.21798e-05	0	0	0	0	0	0	0	0	0	0	0	0	0	0	0	0	0	0	0	0	0	0	0	0	0	0	0	0	0	0	0	0
49	Bacteria	Proteobacteria	Alphaproteobacteria	Rhodobacterales	0	0	0	0	0	0	0	0	0	0	0	0	0	0	0	0	0	0	0	0	0	0	0	0	0	0	0	0	0	0	0	0	0	0	0	0	0	0	0	0	0	0	0	0	0
50	Bacteria	Proteobacteria	Alphaproteobacteria	Rhodospirillales	0.0282017	0	0	0	0	0	0	0	0	0	0	0	0	0	0	0.0310891	0.063073	0	0	0	0	0	8.78246e-05	0	0	0	0	0	0	0	0.00091399	0.00290494	0.000366821	0	0	0	0	0.00112471	0	0	0	0	0	0	0.0293035
51	Bacteria	Proteobacteria	Alphaproteobacteria	Rickettsiales	0	0	0	0	0	0	0	0	0	0	0	0	2.21798e-05	0	0	0	0	0	0	0	0	0	0	0	0	0	0	0	0	0	0	0	0.000106989	0	0	0	0	0.000179953	0	0	0	0	0	0	0
52	Bacteria	Proteobacteria	Alphaproteobacteria	Sphingomonadales	0	0	0	0	0	0	0	0	0	0	0	0	0	0	0	0	0	0	0	0	0	0	0	0	0	0	0	0	0	0	0	0	0	0	0	0	0	0	0	0	0	0	0	0	0
53	Bacteria	Proteobacteria	Gammaproteobacteria	Aeromonadales	0	0	0	0	0	0	0	0.00111954	0	0	0	0	0	0	0	0	0	0	0	0	0	0.000223904	0	0	0	0	0	0	0	0	0	0	0.001452	0	0	0	0	0	0	0.00169234	0.00265318	0	0	0	0
54	Bacteria	Proteobacteria	Gammaproteobacteria	Burkholderiales	0.0419973	0.0329535	0.0211265	0.0195744	0.0380487	0.047654	0.0168635	0.00996926	0.0407036	0.0217921	0.0229257	0.0012288	0.00640997	0.00362701	0.0285452	0.0174269	0.0670932	0	0.0211849	0.0395143	0.0215008	0.0319884	0.0301238	0.00882333	0.0233454	0.0165956	0.00668535	0.0141525	0.126562	0	0.0184689	0.0508531	0.044905	0.0268826	0.0329161	0.0300136	0.0680035	0.0396047	0.0405095	0.0190334	0.0395249	0.0158576	0	0.014765	0.0415664
55	Bacteria	Proteobacteria	Gammaproteobacteria	Enterobacterales	0.00256379	0.00962596	0.00118265	0.0108712	0.000110808	0.0343697	0.0331162	0.00152826	0.000357922	0.000302069	0.00340801	0	0.00399237	0.00481797	0.000288335	0.00279363	0	0.0746858	3.73138e-05	0.00103485	0.126274	0.00595585	0.00111244	0.0027615	0.00152129	0.0315052	0.000208917	0.00131651	0.000781173	0.0204433	0.0104636	0.000534242	0.000687789	0.00043258	0	0.0041064	0.0155958	0.00221942	0.000543471	0.000175828	0.147586	0.00977427	0.0724138	0.0193198	0.000123077
56	Bacteria	Proteobacteria	Gammaproteobacteria	Oceanospirillales	0	0	0	0	0	0	0	0	0	0	0	0	0	0	0	0	0	0	0	0	0	0	0	0	0	0	0	0	0	0	0	0	0	0	0	0	0	0	0	0	0	0	0	0	0
57	Bacteria	Proteobacteria	Gammaproteobacteria	Pasteurellales	0.00105807	0.000241319	0.000470373	4.20955e-05	6.9255e-05	8.47937e-05	0.0137249	0.000284328	0.000430832	0.010033	0.000595879	0	0.000155259	0.000866152	0.00284731	0.000305969	0.000637349	0.000162331	0.000923516	0	0.000170641	0.0069261	0	0	0.000156394	7.96591e-05	0.000539703	0.000438837	0.00467464	0	0	0	0	0.00260117	0.00111219	0	0.0117859	0.00335913	9.7546e-05	0.000175828	0.0166382	0.000478461	0.000365584	7.67676e-05	0
58	Bacteria	Proteobacteria	Gammaproteobacteria	Pseudomonadales	0	0	0	0	0	0	0.000186618	0	0	0	0	0	0	0	0	0	0	0	0	6.3358e-05	0	0	0	0	0	0	0	0	0	0	0	0	0	0	0	0	0	0	0	0	0	0	0	0	0
59	Bacteria	Proteobacteria	Gammaproteobacteria	Xanthomonadales	0	0	0	0	0	0	0	0	0	0	0	0	0	0	0	0	0	0	0	0	0	0	0	0	0	0	0	0	0	0	0	0	0	0	0	0	0	0	0	0	0	0	0	0	0
60	Bacteria	Spirochaetota	Brachyspirae	Brachyspirales	0	0	0	0	0	0	0.000712541	0	0	0	0	0	0	0	0	0	0	0	0	0	0	0	0	0	0	0	0	0	0	0	0	0	0	0	0	0	0	0	0	0	0	0	0	0	0
61	Bacteria	Spirochaetota	Spirochaetia	Spirochaetales	0	0	0	0	0	0	0	0	0	0	0	0	0	0	0	0	0	0	0	0	0	0	0	0	0	0	0	0	0	0	0	0	0	0	0	0	0	0	0	0	0	0	0	0	0
62	Bacteria	Sumerlaeota	Sumerlaeia	Sumerlaeales	0	0	0	0	0	0	0	0	0	0	0	0	0	0	0	0	0	0	0	0	0	0	0	0	0	0	0	0	0	0	0	0	0	0	0	0	0	0	0	0	0	0	0	0	0
63	Bacteria	Sva0485	Sva0485	Sva0485	0	0	0	0	0	0	0	0	0	0	0	0	0	0	0	0	0	0	0	0	0	0	0	0	0	0	0	0	0	0	0	0	0	0	0	0	0	0	0	0	0	0	0	0	0
64	Bacteria	Synergistota	Synergistia	Synergistales	0	0	0	0	0	0.000339175	0.000135722	0.000639738	0	0	0	0	0	0.000378942	0	0	0	0	0	0	0	0	0	0	0	0	0	0	0	0	0	0.000333901	0	0	0	0	5.08954e-05	0	0	0	0	0	0	0	0
65	Bacteria	Verrucomicrobiota	Chlamydiae	Chlamydiales	0	0	0	0	0	0	0	0	0	0	0	0	0	0	0	0	0	0	0	0	0	0	0	0	0	0	0	0	0	0	0	0	0	0	0	0	0	0	0	0	0	0	0	0	0
66	Bacteria	Verrucomicrobiota	Lentisphaeria	Victivallales	0	0	0.000147832	0.000389384	0.000637146	0	0	0	0	0	0.00180855	0	0.00212926	0.00170524	0.000126147	0	0.000294161	0	0	0.00166843	0	0.0042691	0.000131737	0	0	0.00203131	0	0	0	0	0.00236377	0	0	0	0	0.000392184	0	0	0	0.00239566	0.000148776	0.000427197	0	0.000102357	0.000581818
67	Bacteria	Verrucomicrobiota	Verrucomicrobiae	Opitutales	0	0	0	0.000221001	0	0	0	0.00177705	0	0	0	0	0	0	0	0	0	0	0.000111941	0	0	0.000567223	0	0	0	0	0.00604119	0	0	0	0.0145608	0	0	0	0	0	0	0.000314918	0	0.00314293	0	0	0	0	0.00322238
68	Bacteria	Verrucomicrobiota	Verrucomicrobiae	Verrucomicrobiales	0.00223823	0	0.000335981	0	0.00103882	0	0.000814332	0	0	0	0	0	0.00845052	0	0.0540989	0.0231206	0.00924156	0	0.0506535	0	0	0	0	0	0	0.075769	0.00717283	0	0	0	0.000378203	0.0013356	0	0.0194376	0.012589	0	0	0.0183252	0	0.0591442	0	0.00791169	0	0.0122316	0
[truncated: 55 more columns]

## Sheet: SILVA138v_Family
Supplementary Table S5. Relative bacterial frequency data for 100 individuals measured by 16S metagenome sequencing
	Domain	Phylum	Class	Order	Family	Candidate 1	Candidate 2	Candidate 3	Candidate 4	Candidate 5	Candidate 6	Candidate 7	Candidate 8	Candidate 9	Candidate 10	Candidate 11	Candidate 12	Candidate 13	Candidate 14	Candidate 15	Candidate 16	Candidate 17	Candidate 18	Candidate 19	Candidate 20	Candidate 21	Candidate 22	Candidate 23	Candidate 24	Candidate 25	Candidate 26	Candidate 27	Candidate 28	Candidate 29	Candidate 30	Candidate 31	Candidate 32	Candidate 33	Candidate 34	Candidate 35	Candidate 36	Candidate 37	Candidate 38	Candidate 39	Candidate 40	Candidate 41	Candidate 42	Candidate 43	Candidate 44
0	Bacteria	unidentified	unidentified	unidentified	unidentified	0	0	0	0	0	0	0.000220548	0	1.32564e-05	0	0	0	6.65395e-05	0	0	0	0	0	0	0	0	0	0	0	0	0	0	0	0	0.00106815	0	0	4.58526e-05	2.27674e-05	0	0	0.00028356	0	0	4.3957e-05	0.000520717	0	0	0
1	Bacteria	Actinobacteriota	Actinobacteria	Actinomycetales	Actinomycetaceae	0	0	0	0	6.9255e-05	0	5.08958e-05	0	0	0	0	0	0	0	0	0	0	0	0	0	0	0	0	0	0	0	0	0	0	0	0	0	0	0	0	0	0	0	0	0	0	0.000102527	0	0
2	Bacteria	Actinobacteriota	Actinobacteria	Bifidobacteriales	Bifidobacteriaceae	0.00484271	0.0183134	0.00158583	0.00156806	0.00596978	0.054918	0.00144205	0.0163133	0.0206534	0.00379744	0.0124507	0.000327681	0.138136	0.00429016	0.000756879	0.0107222	0.00208364	0.00119043	0.00243472	0.000401267	0	0	0.0043034	0.00208796	0.0149001	0.0502383	0.0107592	0	0.00889049	0.000741774	0.000661855	0.0139905	0.00521192	0.0124367	0.00224804	0.0102199	0.00320641	0.0165407	0.00319115	0.00567045	0	0.00808257	0.0226803	0.0432201
3	Bacteria	Actinobacteriota	Actinobacteria	Corynebacteriales	Corynebacteriaceae	0	0	0	0	0	0	0	0	0	0	0	0	0	0	0	0	0	0	0	0	0	0	0	0	0	0	0	0	0	0	0	0	0	0	0	0	0	0	0	0	0	0	0	0
4	Bacteria	Actinobacteriota	Actinobacteria	Micrococcales	Micrococcaceae	0	0.000107253	0	9.47149e-05	0	0	0	0	0.000225358	0.000755173	0	0	0	0	0	0.000226151	0	0	0	0.000211193	0	0.000238831	0	0	0	0	0	0	0.000384386	0	0.000189101	0	0	0.000125221	0	0	0	5.99844e-05	0	0	0.00104143	0	0	0
5	Bacteria	Actinobacteriota	Coriobacteriia	Coriobacteriales	Atopobiaceae	0	0	0	0	0	0	0.000101792	0	0	0	0	0	0	0	0.000162188	0	0	0	0	0	0	0	0	0	0	0.000159318	0	0	0	0	0	0	0	0	0	0	0	0	0	0	0.000272757	0	0	0.0011771
6	Bacteria	Actinobacteriota	Coriobacteriia	Coriobacteriales	Coriobacteriaceae	0.000732511	0.0066765	0.00170678	0	0.00102497	0	0.00035627	0.00557994	0.00148471	0	0.00958633	0	0.0341569	0.0013669	0	0.00339227	0.000318674	0	7.46276e-05	0.00365364	0.000725225	0.000223904	0.000863608	0	0.00511836	0.00244288	0	0	0.00187233	0.000385722	0.00236377	0.000567632	0.00198695	0	0	0.000807438	0.00106153	0.00310419	0	0.00298908	0.0012646	0.00258027	0	0.00785588
7	Bacteria	Actinobacteriota	Coriobacteriia	Coriobacteriales	Coriobacteriales_Incertae_Sedis	0	0	0	0.000105239	2.7702e-05	0	0	3.5541e-05	0	0	0.000250896	0	0.00645433	0	0.00165793	0.000891301	0	0	0	0	0	0	0	0	0.000838843	0	0.000121868	0	0	0	0.000157585	0.00010017	0	0	0	0	0	0	0.000418054	0.000175828	0	0	0	0.000102357
8	Bacteria	Actinobacteriota	Coriobacteriia	Coriobacteriales	Eggerthellaceae	0.00183128	0.000429012	0.000362859	0.000484098	0.000623295	0.00107405	5.08958e-05	0.00200807	0.000762241	0.000151035	0.00292713	0	0.00106463	0	0.00239679	0.000119727	0	0	0	0.00359029	0	0.000253758	0.000131737	0	0.000383877	0.00110195	0.000121868	0	0	0	0.00201708	0	0.00316383	0.00015368	0	0	0	0.000239938	0.000571341	0.000131871	0.000198368	0.00304164	0.00144828	0.00194478
9	Bacteria	Actinobacteriota	Coriobacteriia	Coriobacteriales	uncultured	0	0	0	0	5.5404e-05	0	0	8.88526e-05	0	0	0	0	0.00117553	0	0.000144168	0	0	0	0	0	0	0	0	0	0	0	0	0	0	0	0	0	0	0	0	0.000115348	0	0	0	0	0	0	0	0
10	Bacteria	Bacteroidota	Bacteroidia	Bacteroidales	unidentified	0	0	0	0	0	0	0	0	0	0	0	0	2.21798e-05	0	0	0	0	0	0	0	0	0	0	0	0	0	0	0	0.00257911	0	0	0	0	0	0	0	0	0	0	0	0	0	0	0
11	Bacteria	Bacteroidota	Bacteroidia	Bacteroidales	Bacteroidaceae	0.126399	0.430379	0.184373	0.265097	0.2121	0.48013	0.173555	0.347076	0.306474	0.286232	0.247823	0.07594	0.232999	0.170754	0.302031	0.279855	0.102172	0.530674	0.425573	0.291341	0.10968	0.066813	0.0512456	0.102916	0.209	0.308307	0.349188	0.0902359	0.553777	0.252915	0.158499	0.274467	0.357406	0.308384	0.145862	0.235518	0.145016	0.163892	0.372417	0.199653	0.0134891	0.274824	0.560103	0.225773
12	Bacteria	Bacteroidota	Bacteroidia	Bacteroidales	Barnesiellaceae	0	0	0.00645083	0.00126287	0.000872612	0.00661391	0	0.0116575	0.0150526	0.0289339	0.00349164	0	0.0417646	0	0.0315907	0	0.0120361	0	0.00175375	0.0173812	0	0.000268685	4.39123e-05	0.00336768	0.0228905	0	0.0341057	0.00724081	0.000223192	0.000771445	0.00778468	0.0204347	0.0260749	0.0252775	0.00470906	0.0151798	0	0.0374003	0	0.0118025	0	0	0	0.0662504
13	Bacteria	Bacteroidota	Bacteroidia	Bacteroidales	Dysgonomonadaceae	0	0	0	0	0	0	0	0	0	0	0	0	0	0	0	0	0	0	0	0	0	0	0	0	0	0	0	0	0	0	0	0	0	0	0	0	0	0	0	0	0	0	0.000942083	0
14	Bacteria	Bacteroidota	Bacteroidia	Bacteroidales	Marinifilaceae	0.0102145	0.00962596	0.00907148	0.00832439	0.00443232	0.00751837	0.000950054	0.00600643	0.00858349	0	0.00861411	0.00638978	0.00452469	0.0113141	0.0190121	0.000505514	0.00254939	0	0.00365675	0.0114889	0.00243164	0.00597077	0.00393747	0.000606183	0.00720836	0.00277479	0.00832187	0.00718596	0.000446384	0.00812984	0.0124492	0.0152259	0.0165375	0.0162445	0.0121868	0.00869726	0.000458059	0.000179953	0	0.0151432	0.000793474	0.000273406	0	0.0142276
15	Bacteria	Bacteroidota	Bacteroidia	Bacteroidales	Muribaculaceae	0.0161559	0	0	0.0227737	0	0	0.00812636	0.00156381	0	0	0.061386	0.0138445	0	0.00659088	0	0	0.00607933	0	0.0754578	0	0	0.0103444	0.00957288	0	0	0	0	0.0476138	0	0	0.0471178	0	0.0256928	0	0	0.000830507	0	0.000419891	0	0.0161762	0.0116541	0	0	0
16	Bacteria	Bacteroidota	Bacteroidia	Bacteroidales	Paludibacteraceae	0	0	0	0	0	0	0	0	0	0	0	0	0	0	0	0	0	0	0	0	0	0	0	0	0	0	0	0	0	0	0	0	0	0	0	0	0	0	0	0	0	0	0	0
17	Bacteria	Bacteroidota	Bacteroidia	Bacteroidales	Porphyromonadaceae	0	0	0	0	0	0	0	0	0	0	0	0	0	0	0	0	0	0	0	0	0	0	0	0	0	0	0	0	0	0	6.30338e-05	0	0	0	0	0	0	0	0	0	0	0	0	0
18	Bacteria	Bacteroidota	Bacteroidia	Bacteroidales	Prevotellaceae	0.223864	0.000294946	0.147522	0.138042	0.37424	0.000791408	0.47289	0.00309207	0.00952469	0	0.0678152	0.335217	0.00443597	0.237069	0.000216251	0.0621117	0.45644	0	0.00535453	0.0992186	0.361034	0.440568	0.481981	0.317707	0.0437478	0.0650416	0.0256098	0.293417	2.47991e-05	0.146337	0.077437	0.0355938	0.0320968	0.044311	0.348541	0.0929015	0.428852	0.255309	0.000111481	0.129168	0.513278	0.0843629	0.000323402	0.030707
19	Bacteria	Bacteroidota	Bacteroidia	Bacteroidales	Rikenellaceae	0.0283645	0.0147473	0.0242578	0.0249626	0.00623295	0.0115885	0.0147767	0.0504149	0.0827064	0.0701879	0.039558	0.0258868	0.0489287	0.0318717	0.105837	0.0674329	0.0179438	0	0.0177147	0.0698205	0.00345548	0.00891138	0.00846044	0.00255944	0.0847231	0.0479149	0.0787444	0.0223258	0.00251711	0.0523099	0.0191938	0.0770643	0.0574533	0.0577324	0.0229537	0.0462546	0.00506046	0.0514666	0.215939	0.0261764	0.00481043	0.0685053	0	0.098979
20	Bacteria	Bacteroidota	Bacteroidia	Bacteroidales	Tannerellaceae	0.0997029	0.0948385	0.0312328	0.0249942	0.0151945	0.0234313	0.00383415	0.0169531	0.015331	0.0591624	0.0498657	0.00450561	0.0470878	0.0277033	0.0402948	0.00569369	0.0157866	0.213032	0.00538251	0.0467159	0.0160829	0.00525428	0.0306069	0.00532094	0.0297149	0.0294606	0.0240777	0.0120132	0.0146935	0.0564045	0.0264742	0.0335237	0.0252189	0.0481871	0.0269055	0.0216393	0.0191003	0.0297373	4.18054e-05	0.0292754	0.0150016	0.0193093	0	0.0286343
21	Bacteria	Bacteroidota	Bacteroidia	Bacteroidales	uncultured	0	0	0	0	0	0	0	0	0	0	0	0	0	0	0	0	0	0	0	0	0	0	0	0	0	0	0	0	0	0	0	0	0	0	0	0	0	0	0	0	0	0	0	0
22	Bacteria	Bacteroidota	Bacteroidia	Cytophagales	Cyclobacteriaceae	0	0	0	0	0	0	0	0	0	0	0	0	0	0	0	0	0	0	0	0	0	0	0	0	0	0	0	0	0	0	0	0	0	0	0	0	0	0	0	0	0	0	0	0
23	Bacteria	Bacteroidota	Bacteroidia	Flavobacteriales	Flavobacteriaceae	0	0	0.000161271	0.000210478	0	0	0	0	0	0	0	0	0	0	0	0	0	0	0	0	0	0	0	0	0	0.00434142	0.00301189	0	0	0	9.45507e-05	0	0	0	0	0	0	0.000989743	0	0	0	0	0	0
24	Bacteria	Bacteroidota	Bacteroidia	Flavobacteriales	Weeksellaceae	0	0	0	0	0	0	0	0	0	0	0	0	0	0	0	0	0	0	0	0	0	0	0	0	0	0	0	0	0	0	0	0	0	0	0	0	0	0	0	0	0	0	0	0
25	Bacteria	Campilobacterota	Campylobacteria	Campylobacterales	Campylobacteraceae	0	0	0	0	0	8.47937e-05	0.000101792	0	0	0	0	0	0	0	0	7.9818e-05	0	0	1.86569e-05	0	0	0	0	0	0	0	0	0	0	0	0	0	4.58526e-05	0	0	0	0	0	0	0	0.000867862	0	0.000267158	0
26	Bacteria	Chloroflexi	Anaerolineae	Anaerolineales	Anaerolineaceae	0	0	0	0	0	0	0	0	0	0	0	0	0	0	0	0	0	0	0	0	0	0	0	0	0	0	0	0	0	0	0	0	0	0	0	0	0	0	0	0	0	0	0	0
27	Bacteria	Cyanobacteria	Cyanobacteriia	Chloroplast	Chloroplast	0	0.000294946	0	0	0	0	8.48263e-05	7.1082e-05	0.00014582	0.000151035	0.00010454	0	0.000110899	0	0	6.6515e-05	0	0	0	0	0	0	5.85497e-05	0	5.68707e-05	9.29356e-05	0	0	0	0	9.45507e-05	0	0.00111575	0	0	0	0	0.000824786	0	0.000549463	0	0	0	0.000102357
28	Bacteria	Cyanobacteria	Vampirivibrionia	Gastranaerophilales	Gastranaerophilales	0	0	0	0	0	0	0	0	0.00196194	0.000496256	0	0	0	0	0.000648754	0	0	0	0	0.00629356	0	0	0	0	0	0	0.017166	0	0	0	0.00157585	0	0	0	0	0.014903	0	0	0	0.0141981	0	0	0	0
29	Bacteria	Desulfobacterota	Desulfobulbia	Desulfobulbales	Desulfobulbaceae	0	0	0	0	0	0	0	0	0	0	0	0	0	0	0	0	0	0	0	0	0	0	0	0	0	0	0	0	0	0	0	0	0	0	0	0	0	0	0	0	0	0	0	0
30	Bacteria	Desulfobacterota	Desulfovibrionia	Desulfovibrionales	Desulfovibrionaceae	0.00191267	0	0.00221747	0.00455684	0.00281175	0.0133691	0.00108578	0.00805004	0	0	0.00494475	0.00819202	0.00978131	0.0393964	0.00702817	0.0132365	0.00105408	0	0.000988815	0.0323759	0.00341282	0.0102548	0.00184432	0.00437799	0.00790503	0.00623996	0.00482251	0.00499177	0.00057038	0.00433196	0.00813136	0.018231	0.00904825	0.00625534	0.00123051	0.00339124	0.00217396	0.00311919	0.00993576	0.0106156	0.00136378	0.00312708	0	0.00330101
31	Bacteria	Firmicutes	unidentified	unidentified	unidentified	0	0	0	0	0	0	0	0	0	0	0	0	0	0	0	0	0	0	0	0	0	0	0	0	0	0	0	0	0	0	0	0	0	0	0	0	0	0	0	0	0	0	2.81219e-05	0
32	Bacteria	Firmicutes	Bacilli	unidentified	unidentified	0	0	0	0	0	0	0	0	0	0	0	0	0	0	0	0	0	0	0	0	0	0	0	0	0	0	0	0	0	0	0	0	0	0	0	0	0	0	0	0	0	0	0	0
33	Bacteria	Firmicutes	Bacilli	Acholeplasmatales	Acholeplasmataceae	0	0	0	0	0	0	0	0	0	0	0	0	0	0	0	0	0	0	0	0	0	0.00283612	0	0	0	0	0	0	4.95983e-05	0	0	0	0	0	0	0	0	0	0	0	0	0	0	0
34	Bacteria	Firmicutes	Bacilli	Bacillales	Bacillaceae	0	0	0	0	0	0	0	0	0	6.47291e-05	0	0	4.43597e-05	0	0	0	0	0	0	0	0	0	0	0	0	0	0	0	0	0	0	0	0	0	0	4.61393e-05	0	0	0	0	0	0	0	0
35	Bacteria	Firmicutes	Bacilli	Erysipelotrichales	unidentified	0	0	0	0	0	0	0	0	0	0	0	0	0	0	0	0	0	0	0	0	0	0	0	0	0	0	0	0	0	0	0	0	0	0	0	0	0	0	0	0	0	0	0	0
36	Bacteria	Firmicutes	Bacilli	Erysipelotrichales	Erysipelatoclostridiaceae	0.000488341	0.00289583	0.0053085	0.00773505	0.00223001	0.00180893	0.000458062	0.00177705	0.00580628	0.0135931	0.00583334	0.00245761	0.00383711	0.00220598	0.0141825	0.00822126	0.00218169	0.00228616	0.000652991	0.00561774	0.0148884	0.00473184	0.00062941	0.00498417	0.00484823	0.00159318	0.00518811	0.00586945	0.00817131	0.00264071	0.0113146	0.00320545	0.00262888	0.0168023	0.00222438	0.00366807	5.81662e-05	0.00977746	0.0030518	0.00213191	0.00607503	0.000717691	0.00203884	0.00194478
37	Bacteria	Firmicutes	Bacilli	Erysipelotrichales	Erysipelotrichaceae	0.020958	0.0026277	0.00631644	0.00221001	0.000387828	0.00265687	0.000983985	0.00755247	0.0137468	0.000733597	0.0757289	0	0.00405891	0.00131276	0	0.000199545	0.000294161	0.00112279	5.59707e-05	0.00667371	0.0119449	0.00467213	0.00213706	0	0	0.00334568	0	0.00263302	0.000235592	0.00468801	0.00217467	0.00146916	0.00162013	0.00198645	0	0.000322975	0.000574391	0.0118319	0.00188124	0.0121102	0.00530636	0.0190188	0.00953332	0.000665319
38	Bacteria	Firmicutes	Bacilli	Izemoplasmatales	Izemoplasmatales	0	0	0	0	0	0	0	0.0106801	0	0	0	0	0	0	0	0	0	0	0	0	0.000255962	0.000373173	0	0	0	0	0	0	0	0	0.00144978	0	0	0.0121066	0	0	0	0	0	0.00206598	0	0	0	0
39	Bacteria	Firmicutes	Bacilli	Lactobacillales	Aerococcaceae	0	0	0	0	0	0	0	0	0	0	0	0	0	0	0	0	0	0	0	0	0	0	0	0	0	0	0	0	0	0	0	0	0	0	0	0	0	0	0	0	0	0	0	0
40	Bacteria	Firmicutes	Bacilli	Lactobacillales	Carnobacteriaceae	0	0.000160879	0	0	0	0	0.000508958	0	0	0	0	0	0	0	0	0	0	0	0	0	0	0	0	0	0	0	8.70489e-05	0	8.67969e-05	0	0	0	0	0	0	0	0	0	0	0	0.000694289	0	0.000267158	0
41	Bacteria	Firmicutes	Bacilli	Lactobacillales	Enterococcaceae	0	0	0	0	0	0.000282646	0	0	0.00172995	0.00047468	0	0	0	0	0	0	0	0.000189386	0	0	0	0	0	0	0	0	0	0	0	0	0	0	0	0	0	0	0.000174498	0.000134965	0	0	0	0.000546812	0	0.000179124
42	Bacteria	Firmicutes	Bacilli	Lactobacillales	Lactobacillaceae	0	0	0	0.00203111	0	0.00189373	0.000271444	0	8.61663e-05	0	5.22701e-05	0.00106496	0.00465777	0.00125863	0.00019823	0.00421705	0	0	0	0	0.000554584	0.000686639	0	0	0.00481979	0	0.000348195	0	0.000223192	0.0027594	0	0.00013356	0	0.000341511	0	0.00131497	0	0.0092376	0	0	0.0223412	0.000598076	0	0.00171448
43	Bacteria	Firmicutes	Bacilli	Lactobacillales	Leuconostocaceae	0	0	0	0.00201006	0	0	0.00111971	0.000159935	3.97691e-05	0.000151035	0	0	4.43597e-05	0	0	0.00039909	0	0	0	0	0	0.000567223	0	0.000471476	0	3.98295e-05	0.000417835	0.000219419	0	0.00210664	0	0.00010017	0	0.00036997	0	0	2.18123e-05	0.00034491	4.18054e-05	0	0.00262838	0.000512636	0	0.00133064
44	Bacteria	Firmicutes	Bacilli	Lactobacillales	Streptococcaceae	0.00272657	0.00595254	0.00866831	0.00193639	0.000470934	0.00333522	0.0079567	0.000995149	0.00764229	0.00377586	0.000888592	0.000819202	0.000133079	0.000649614	0.000540628	0.0178393	0.000196107	0.00163684	0.00012127	0.000443506	0.00127981	0.00102996	0.000117099	0.000808244	0.000483401	0.000703655	0.00682463	0.0012068	0.00150035	0.0110376	0.00040972	0.000400681	0.00136029	0.00220274	0	0.00113041	0.00116332	0.00535361	0.000599211	0.000659355	0.0420789	0.00517763	0.00732575	0.00220067
45	Bacteria	Firmicutes	Bacilli	Mycoplasmatales	Mycoplasmataceae	0	0	0	0	0	0	0	0	0	0	0	0	0	0	0	0	0	0	0	0.000105597	0	0	0	0	0	0	0	0	0	0	0	0	0	0	0	0	0	0	0	0	0	0	0	0
46	Bacteria	Firmicutes	Bacilli	RF39	RF39	0	0	0	0	0.00128814	0	0.00105185	0.00296768	0.00429506	0.00135931	0	0.00434177	0.000177439	0	0.000450524	6.6515e-05	0.00220621	0	0.00267726	0	0.000298622	0.00250772	0.000936796	0	0	0.00335896	0.000818259	0.00148108	0	0	0.00267894	0	0.00487566	0.000950538	0	0.000807438	0	0	0	0.00896723	0	0	0	0
47	Bacteria	Firmicutes	Bacilli	Staphylococcales	Gemellaceae	0	0	0	0	0	0	0.000101792	0	0	0	0	0	0	0	0	0	0	4.05828e-05	0	0	0	7.46347e-05	0	0	0	0	0	0	0.000161194	0	0	0	0	0	0	0	0	0	0	0	0.00012398	0	0.000126548	0
48	Bacteria	Firmicutes	Clostridia	unidentified	unidentified	0	0	0	2.10478e-05	0.000166212	0	0	0	0	0.000302069	0	0	0.000133079	0	0.000144168	0	9.80536e-05	0	0	0	0	0	0	0	0	0	0	0	0	0	9.45507e-05	0	0	6.83021e-05	0	0	0	0	0	4.3957e-05	0	0	0	0.000255892
49	Bacteria	Firmicutes	Clostridia	Caldicoprobacterales	Caldicoprobacteraceae	0	0	0	0	0	0	0	0	0	0	0	0	0	0	0	0	0	0	0	0	0	0	0	0	0	0	0	0	0	0	0	0	0	0	0	0	0	0	0	0	0	0	0	0
50	Bacteria	Firmicutes	Clostridia	Christensenellales	Christensenellaceae	0.0194115	0.000884837	0.000860111	0.00131548	0.00623295	0	0.00154384	0.0560482	0.00159739	0.023173	0.00323029	0.00417793	0.0508584	0.00579239	0.0305095	0.00462944	0.00323577	0	0.0496646	0.00061246	0.00349814	0.00301524	0.00759683	0.000942951	0.00174877	0.00118161	0.0482251	0.00987383	0	0.00884194	0.0191938	0	0.0165834	0.00947692	0.000946544	0.00675941	0	0.00602843	0.000167222	0.0149454	0	0.00847559	0	0.0607232
51	Bacteria	Firmicutes	Clostridia	Clostridia	Hungateiclostridiaceae	0	0	0	0	0	0	0	0.000266558	0	0	0	0	0	0	0	0.000319272	0	0	0	0	0	0	0	0	0	0	0	0	0	0	0	0	0	0	0	0	0	0	0	0	0	0	0	0
52	Bacteria	Firmicutes	Clostridia	Clostridia_UCG-014	Clostridia_UCG-014	0	0.019091	0	0	0.00322728	0	0.00666735	0.0468075	0.0547819	0.00791853	0	0.07594	0.00175221	0.00102856	0.0177867	0.00123718	0.0197088	0	0.0216606	0	0.00776417	0.0155837	0.0187652	0.00336768	0	0	0.0082	0	0	0	0.038293	0	0.00119217	0.00155387	0.00899217	0.00117655	0	0.000179953	0	0.0280226	0	0	0	0.00588551
53	Bacteria	Firmicutes	Clostridia	Clostridia_vadinBB60_group	Clostridia_vadinBB60_group	0.000325561	0	0.000309102	0	0.00109423	0	0.000458062	0.019281	0.000914689	0	0.000240442	0.00147456	0.0271925	0.00437136	0.00450524	0	0.000637349	0	4.66422e-05	0.00031679	0.00776417	0.00259729	0.000687959	0	0.00663965	0.00102229	0.00362123	0	0	0	0.00601973	0.000701192	0.00181882	0.0100575	0.000283963	0.000299905	0	0.00376402	0.00135171	0.0167696	0	0.00193093	0	0.0018936
54	Bacteria	Firmicutes	Clostridia	Clostridiales	Clostridiaceae	0	0	0	0.00302035	0	0	0	0	0.0115927	0.000366798	0	0.00294913	8.87193e-05	0.000351874	0	0	0	0.000689907	0.00752806	0	0	0.000865762	0	0.00161649	0.000639795	0.00357138	0.000243737	0.0211739	0	0.000534077	0.000220618	0	0	0.000950538	0.00205873	0	0	0.000209945	9.7546e-05	0.000373635	0	0.000256318	8.43656e-05	0
55	Bacteria	Firmicutes	Clostridia	Eubacteriales	Anaerofustaceae	0	0	0	0	0	0	0	0	0	0	0	0	0	0	0	0	0	0	0	0	0	0	0	0	0	0	0	0	0	0	0	0	0	0	0	0	0	0	0	0	0	3.41758e-05	0	0
56	Bacteria	Firmicutes	Clostridia	Eubacteriales	Eubacteriaceae	0	0	0	0	0	0	0	0	0	0	0	0	0	0	0	0	0	2.70552e-05	0	0.000274551	0	0	0	0	0	0	0	0	0	0	0	0	0	0	0	0	0	0	0	0	0	0	0	0
57	Bacteria	Firmicutes	Clostridia	Lachnospirales	unidentified	0	0	0	0	0	0	0	0	0	0	0	0	0	0	0	0	0	0	0	0	0	0	0	0	0	0	0	0	0	0	0	0	0	0	0	0	0	0	0	0	0	0	0	0
58	Bacteria	Firmicutes	Clostridia	Lachnospirales	Defluviitaleaceae	0	0	0	0.000157858	0	0	0	0.000231017	0	0	0	0	0.000665395	0	0.00127949	0.000172939	0	0	0	8.44773e-05	8.53206e-05	0	0	0	7.10884e-05	0.000106212	0.000156688	0	0	0	0.000189101	0	0	0.000591952	0	0	0	0	0	0	0	0	0	0.000153535
59	Bacteria	Firmicutes	Clostridia	Lachnospirales	Lachnospiraceae	0.0907093	0.0763641	0.16365	0.167677	0.0909041	0.114641	0.0929696	0.146269	0.15781	0.233694	0.129358	0.163431	0.0845273	0.127392	0.0868609	0.128148	0.111879	0.147437	0.155766	0.17812	0.106309	0.0854268	0.115489	0.234189	0.073676	0.113766	0.0884417	0.204498	0.0584763	0.110346	0.0975763	0.153561	0.13201	0.121379	0.0969971	0.175445	0.0400038	0.0968598	0.124302	0.135893	0.0534603	0.0668307	0.172232	0.0617211
60	Bacteria	Firmicutes	Clostridia	Monoglobales	Monoglobaceae	0.00272657	0.00608661	0.00198901	0.00224159	0.00271479	0.00392877	0.000559853	0.00559771	0.000596536	0.00504887	0.00426524	0.0141722	0.000487956	0.000717282	0.00104521	0.00163627	0.000661862	0	0.000942173	0.000253432	0.000682565	0.000865762	0.000102462	0	0.000312789	0.000464678	0.000835669	0.00219419	0	0.0132332	0.00330928	0.00233731	0.00108518	0.00576015	0.00153813	0.00101506	0.000705265	0.00550357	0.00465434	0.00600013	0.000297553	0.000341758	0.00441514	0.000358249
61	Bacteria	Firmicutes	Clostridia	Oscillospirales	unidentified	0	0	0	0.000178906	0	0	0	0.00033764	0.000914689	0	0	0	0.000643215	0.00014887	7.20838e-05	0.000305969	0	0	0	0	0	5.97077e-05	0.000278111	0	0	6.63825e-05	0.000261147	0	0	0	0	0	0	0	0	0	0	0	0	0	0	0	0	0
62	Bacteria	Firmicutes	Clostridia	Oscillospirales	Butyricicoccaceae	0.00337769	0.000348572	0.00149176	0.00833491	0.00210535	0.00644432	0.00113667	0.00142164	0.00287663	0.0094073	0.00321984	0.00131072	0.00133079	0.00124509	0.000414482	0.00113076	0.000857969	0.00896879	0.00161382	0.00162619	0.00298622	0.00185094	0.00166867	0.00316562	0.00183408	0.00270841	0.0062327	0.000603401	0.00256671	0.00243302	0.00198557	0.000868143	0.00476867	0.00210598	0.00433044	0.00136111	0.00189767	0.00163458	0.00144926	0.000197807	0.00481043	0.00191384	0	0.00168889
63	Bacteria	Firmicutes	Clostridia	Oscillospirales	Ethanoligenenaceae	0	0	0	4.20955e-05	0	0	0	0	0	0	0	0	0	0	0	0	0	0	0	0	0	0	0	0	0	0	0	0	0	0	0	0	0	1.70755e-05	0	0	0	0	0	0	0	0	0	0
64	Bacteria	Firmicutes	Clostridia	Oscillospirales	Oscillospiraceae	0.0519676	0.053412	0.0610813	0.0446107	0.0332147	0.0365743	0.0088389	0.0605441	0.0364086	0.0435195	0.0332751	0.0747112	0.105509	0.0509541	0.0891856	0.0556199	0.0222337	0.0145422	0.034282	0.051151	0.0306301	0.0538713	0.0586083	0.063043	0.0575958	0.0494284	0.0774387	0.0479978	0.00193433	0.0565825	0.0918403	0.0712545	0.0891222	0.0445728	0.0383824	0.0485155	0.00337364	0.0619039	0.0366355	0.0781995	0.00902576	0.0623708	0.0306388	0.0784309
65	Bacteria	Firmicutes	Clostridia	Oscillospirales	Oscillospirales	0	0	0	4.20955e-05	0	0	0	0.00035541	0	0	0	0	0	0	0	0	0	0	4.66422e-05	0	0	0	0	0	0	0	0.00389979	0	0	0	0.000126068	0	9.17053e-05	0	0	0	0	0	0	0.000219785	0	0	0	0
66	Bacteria	Firmicutes	Clostridia	Oscillospirales	Ruminococcaceae	0.170146	0.143531	0.243721	0.168214	0.154896	0.0432165	0.114414	0.117801	0.169741	0.145123	0.179088	0.0938806	0.0549616	0.214643	0.109549	0.23408	0.0390499	0.00105515	0.0824914	0.10849	0.144661	0.161106	0.143754	0.0864821	0.327575	0.106491	0.120354	0.104059	0.00380667	0.206955	0.196413	0.126983	0.0981858	0.166361	0.189261	0.179113	0.00776518	0.128127	0.143351	0.0658036	0.00900097	0.257685	0.0526442	0.163873
67	Bacteria	Firmicutes	Clostridia	Oscillospirales	UCG-010	0	0	6.71962e-05	0.000568289	0.000567891	0	0	0.00698381	0.000318153	0.000906208	0	0.00630786	0.00621035	0.00014887	0.0100016	0.00852722	0.00330931	0	0.000139927	0	0.00294356	0.0160017	0.000380573	0	0	0	0.00670276	0.000164564	0	0	0.0471178	0	0	0.00135466	0.000520599	0.0012919	0	0.000449883	0	0.0266819	0	0.000615164	0	0.00145858
68	Bacteria	Firmicutes	Clostridia	Oscillospirales	UCG-011	0	0	0	0	0	0	0	3.5541e-05	0	0	0	0	2.21798e-05	0	0	0	0	0	0	0	0	0	0	0	0	0	0	0	0	0	0	0	0	0	0	0	0	0	0	0	0	0	0	0
69	Bacteria	Firmicutes	Clostridia	Oscillospirales	Clostridium_methylpentosum_group	0	0.000723958	0	0	0	0	0	0	0	0	0	0	8.87193e-05	0	0	0	0	0	0	0	0	0	0	0	0	0	0	0	0	0.000148355	0	0	6.11368e-05	0	0	0	0	0.000134965	0	0	0	0	0	0
70	Bacteria	Firmicutes	Clostridia	Oscillospirales	Eubacterium_coprostanoligenes_group	0.00293005	0.00332484	0.0385975	0.0224264	0.0225217	0	0.00754954	0.00979155	0.0177304	0.00204976	0.00951316	0.0682395	0.0474648	0.0179862	0.000883026	0.00357851	0.0122077	0	0.00504669	0.00473073	0.00853206	0.0216888	0.0189555	0.0244494	0.0490368	0.0509818	0.0322603	0.00334613	0	0.0062309	0.0486306	0.0043741	0.00472282	0.00119529	0.00352588	0.0558516	3.63539e-05	0.019255	0.00132384	0.0207477	0.000471125	0.0558603	4.21828e-05	0.0199084
71	Bacteria	Firmicutes	Clostridia	Oscillospirales	uncultured	0	0	0	3.15716e-05	0	0	0	0.000550886	0	0	0	0	0	0.000108269	0	0	0	0	0	4.22386e-05	0.000127981	0	0	0	0	0	0	0	0	0	0.000756406	0	6.11368e-05	2.27674e-05	0	0	0	0	0	0	0	0	0	0
72	Bacteria	Firmicutes	Clostridia	Peptococcales	Peptococcaceae	0	0	0	0.000105239	0	0	0.000288409	0.000159935	0	0.00250286	0.000742235	0.00311297	0.000909373	0.000162404	0	0	0.000269647	0	0.000438437	0	0.000511924	0.000432881	0.000219561	0	0	0	0	0	0	0	0.0018595	0	0.000275116	0.000506574	0	0.000346045	0	0	0	0.000175828	0	6.83515e-05	0	0.000332659
73	Bacteria	Firmicutes	Clostridia	Peptostreptococcales-Tissierellales	Anaerovoracaceae	0.000651121	0	0.00178742	0.00199954	0.000609444	0.000282646	0.000186618	0.000302099	0.000251871	0	0.000710873	0	0.00343787	0.00215185	0.0011173	0.000824786	0	0	4.66422e-05	0.00255544	0.000511924	0.0017763	0.000468398	0	7.10884e-05	0.000225701	0.000870489	0.000603401	0	0.000890128	0.00255287	0.000267121	0.00294985	0.000831009	0.000828226	0.00113041	0	0.000224942	0.000334443	0.00182422	4.95921e-05	0.000854394	0	0.00138182
74	Bacteria	Firmicutes	Clostridia	Peptostreptococcales-Tissierellales	Peptostreptococcaceae	0	0.000214506	0	0.000126287	0.00027702	0.000339175	0.00067861	0	0.000251871	0.000345222	0.000428615	0.000655362	0.00141951	0.000406009	0.00019823	0.000172939	0.00963377	0.000919876	0	0.000401267	0.00162109	0.00117923	0.000380573	0.000134707	0.000710884	6.63825e-05	0.000156688	0.0024136	0.000979566	0.000267039	0	0	0.000198695	0.00071148	0	0	5.08954e-05	0	0.000613146	4.3957e-05	0	0.000683515	0.000829595	0.000127946
75	Bacteria	Firmicutes	Clostridia	Peptostreptococcales-Tissierellales	Peptostreptococcales-Tissierellales	0	5.36265e-05	0	0	0	0	0	0	0	0	0	0	2.21798e-05	2.70673e-05	0	7.9818e-05	0	0	0	0	0	0	0	0	5.68707e-05	0	0	0	0	0	0	0	9.17053e-05	0	0	0	0	0	0	0	0	0	0	0
76	Bacteria	Firmicutes	Clostridia	uncultured	uncultured	0	0	0	0	0.000484785	0	0	0.000995149	0	0	0	0	2.21798e-05	0	0	0	0	0	0	0	0	0	0	0	0	0	0	0	0	0	0	0	0	2.27674e-05	0	0	0	0	0	0	0	0	0	0
77	Bacteria	Firmicutes	Incertae_Sedis	DTU014	DTU014	0	0	0	7.36672e-05	0	0	0	0.000231017	0	0	0	0	0.000133079	0	0	0	0	0	0	0.000190074	0	0	0	0	0	0	0	0	0	0	0.000157585	0	0	0.000233366	0	0	0	0.000104973	0	0.000241764	0	0	0	0
78	Bacteria	Firmicutes	Negativicutes	Acidaminococcales	Acidaminococcaceae	0	0.0637351	0.0230886	0.0391488	0.00454313	0.0972866	0.00466545	0.0170242	0.000861663	0	0.00228943	0	0	0.00392475	0.0331766	0	0.000661862	0	0.024879	0.0115523	0.000255962	0.0134044	7.31872e-05	0.125817	0	0	0.00915754	0.0746023	0.056046	0.013708	0.0121025	0.0840429	0.0239656	0.0280494	0.00106486	0.00286064	0	0.000314918	0	0.0261544	0.000272757	0.00210181	0	0.0139205
79	Bacteria	Firmicutes	Negativicutes	Veillonellales-Selenomonadales	Selenomonadaceae	0.0165629	0	0.010617	0	0.00804743	0	0	0	0	0.000151035	0	0.00614402	0	0.00334281	0	0.00282024	0	0	0	0.00171067	0.000767885	0.00329885	0	0	0.00969645	0.000119489	0	0.0156884	0	0.00139453	0.00157585	0	0.00371406	0	0	0.00835121	0	4.49883e-05	0.00157467	0.00400009	0.000892658	0	0	0.000537373
80	Bacteria	Firmicutes	Negativicutes	Veillonellales-Selenomonadales	Veillonellaceae	0.026696	0.000536265	0.000241906	4.20955e-05	0.000401679	0.00166761	0.00420738	0	0.0055743	0.0233456	0.0135798	0.00327681	0.00727499	0.0179185	0.000216251	0.00670471	0.0138746	0.00133923	0.000578364	0.000105597	0.00635638	0.000462735	0.00424485	0	0.00837421	0.016662	0.00255924	0.000438837	8.67969e-05	0.011364	0.000378203	0.00013356	0	0.000910695	0.0377908	0.0242231	0.134466	0.0101674	0.0293614	0.000109893	0.0697265	0.0146785	0.0612495	0.0105427
81	Bacteria	Firmicutes	uncultured	uncultured	uncultured	0.00024417	0	0	0	0	0	0	0	0	0	0	0	0	0	0	0	0	0	0	0	0	0	0	0	0	0	0	0	0	0	0	0	0	2.27674e-05	0	0	0	0	0	0	0	0	0	0
82	Bacteria	Fusobacteriota	Fusobacteriia	Fusobacteriales	Fusobacteriaceae	0	0.00136748	0	0	0	0.00336348	0	0.000604197	0	0	0	0	0	0	0	0	0	0	0	0	0	0	0	0	0	0	0	0	0.14758	0	0.000126068	0.00500851	0	0	0	0	0.108604	0	0.00543471	8.7914e-05	0.00101664	0	0	0
83	Bacteria	Fusobacteriota	Fusobacteriia	Fusobacteriales	Leptotrichiaceae	0	0	0	3.15716e-05	0	0	0.000203583	0	0	0	0	0	0	0	0	0	0	0	0	0.000168955	0	0	0	0	0.0002417	0	0	0	0	0	0	0	0	0	0	0	0.000407163	0	0	0	0.000619901	0	0	0
84	Bacteria	Patescibacteria	Saccharimonadia	Saccharimonadales	Saccharimonadaceae	0	0.000160879	0	9.47149e-05	5.5404e-05	0.00031091	0	0	1.98845e-05	0	0	0	0	0	0	0	0	0	0	0	0	0	0	0	5.68707e-05	0	0	0	0	0	0	0	0	0	0	0	5.08954e-05	0	0	0	0	6.83515e-05	0	0
85	Bacteria	Patescibacteria	Saccharimonadia	Saccharimonadales	Saccharimonadales	0	0	0	0	0	0	0	0	0	0	0	0	0	0	0	0	0	0	0	0	0	0	0	0	0	0	0	0	9.91965e-05	0	0	0	0	0	0	0	0	0	0	0	0	0	0	0
86	Bacteria	Planctomycetota	Phycisphaerae	MSBL9	SG8-4	0	0	0	0	0	0	0	0	0	0	0	0	0	0	0	0	0	0	0	0	0	0	0	0	0	0	0	0	0	0	0	0	0	0	0	0	0	0	0	0	0	0	0	0
87	Bacteria	Proteobacteria	Alphaproteobacteria	Caulobacterales	Caulobacteraceae	0	0	0	0	0	0	0	0	0	0	0	0	0	0	0	0	0	0	0	0	0	0	0	0	0	0	0	0	0	0	0	0	0	0	0	0	0	0	0	0	0	0	0	0
88	Bacteria	Proteobacteria	Alphaproteobacteria	Caulobacterales	Hyphomonadaceae	0	0	0	0	0	0	0	0	0	0	0	0	0	0	0	0	0	0	0	0	0	0	0	0	0	0	0	0	0	0	0	0	0	0	0	0	0	0	0	0	0	0	0	0
89	Bacteria	Proteobacteria	Alphaproteobacteria	Kiloniellales	Kiloniellaceae	0	0	0	0	0	0	0	0	0	0	0	0	0	0	0	0	0	0	0	0	0	0	0	0	0	0	0	0	0	0	0	0	0	0	0	0	0	0	0	0	0	0	0	0
90	Bacteria	Proteobacteria	Alphaproteobacteria	Rhizobiales	Beijerinckiaceae	0	0	0	0	0	0	0	0	0	0	0	0	2.21798e-05	0	0	0	0	0	0	0	0	0	0	0	0	0	0	0	0	0	0	0	0	0	0	0	0	0	0	0	0	0	0	0
91	Bacteria	Proteobacteria	Alphaproteobacteria	Rhizobiales	Rhizobiaceae	0	0	0	0	0	0	0	0	0	0	0	0	0	0	0	0	0	0	0	0	0	0	0	0	0	0	0	0	0	0	0	0	0	0	0	0	0	0	0	0	0	0	0	0
92	Bacteria	Proteobacteria	Alphaproteobacteria	Rhizobiales	Xanthobacteraceae	0	0	0	0	0	0	0	0	0	0	0	0	0	0	0	0	0	0	0	0	0	0	0	0	0	0	0	0	0	0	0	0	0	0	0	0	0	0	0	0	0	0	0	0
93	Bacteria	Proteobacteria	Alphaproteobacteria	Rhodobacterales	Rhodobacteraceae	0	0	0	0	0	0	0	0	0	0	0	0	0	0	0	0	0	0	0	0	0	0	0	0	0	0	0	0	0	0	0	0	0	0	0	0	0	0	0	0	0	0	0	0
94	Bacteria	Proteobacteria	Alphaproteobacteria	Rhodospirillales	uncultured	0.0282017	0	0	0	0	0	0	0	0	0	0	0	0	0	0	0.0310891	0.063073	0	0	0	0	0	8.78246e-05	0	0	0	0	0	0	0	0.00091399	0.00290494	0.000366821	0	0	0	0	0.00112471	0	0	0	0	0	0
95	Bacteria	Proteobacteria	Alphaproteobacteria	Rickettsiales	Mitochondria	0	0	0	0	0	0	0	0	0	0	0	0	2.21798e-05	0	0	0	0	0	0	0	0	0	0	0	0	0	0	0	0	0	0	0	0.000106989	0	0	0	0	0.000179953	0	0	0	0	0	0
96	Bacteria	Proteobacteria	Alphaproteobacteria	Sphingomonadales	Sphingomonadaceae	0	0	0	0	0	0	0	0	0	0	0	0	0	0	0	0	0	0	0	0	0	0	0	0	0	0	0	0	0	0	0	0	0	0	0	0	0	0	0	0	0	0	0	0
97	Bacteria	Proteobacteria	Gammaproteobacteria	Aeromonadales	Aeromonadaceae	0	0	0	0	0	0	0	0	0	0	0	0	0	0	0	0	0	0	0	0	0	0	0	0	0	0	0	0	0	0	0	0	0	0	0	0	0	0	0	0	0	0	0	0
98	Bacteria	Proteobacteria	Gammaproteobacteria	Aeromonadales	Succinivibrionaceae	0	0	0	0	0	0	0	0.00111954	0	0	0	0	0	0	0	0	0	0	0	0	0	0.000223904	0	0	0	0	0	0	0	0	0	0	0.001452	0	0	0	0	0	0	0.00169234	0.00265318	0	0	0
99	Bacteria	Proteobacteria	Gammaproteobacteria	Burkholderiales	Burkholderiaceae	0	0	0	0	0	0	0	0	0	0	0	0	4.43597e-05	0	0	0	0	0	0	0	0	0	4.39123e-05	0	0	3.98295e-05	0	0	0	0	0	0	0	0	0	0	0	0	0	0	0	0	0	0
100	Bacteria	Proteobacteria	Gammaproteobacteria	Burkholderiales	Comamonadaceae	0.00150572	0	0	0	4.1553e-05	0	0	0	0	0	0	0	0	0	0	0	0	0	0	0	0	0	2.92749e-05	0	4.2653e-05	0	0	0	0	0	0	0	0	0	0	0	0	0	0	0	0	0	0	0
101	Bacteria	Proteobacteria	Gammaproteobacteria	Burkholderiales	Neisseriaceae	0	0	0.000120953	0	0	0	0	0	7.95381e-05	0.000129458	0	0	0	0	0	0	0	0	0	0	0	0	0	0	0	0	0	0	0	0	0	0	0	0	0	0	0	0	0	0	0.00012398	0	0	0
102	Bacteria	Proteobacteria	Gammaproteobacteria	Burkholderiales	Oxalobacteraceae	0	0	0	0	0	0	0	0.000621968	0	0	0	0	0	0	0.00171199	0.00079818	0	0	0	6.3358e-05	0	0.000179123	0	0	0	0	0.000470064	0	0	0	0.00176495	0	0	0.00043258	0	0.000230696	0	5.99844e-05	0	0.00116486	0	0	0	0
103	Bacteria	Proteobacteria	Gammaproteobacteria	Burkholderiales	Sutterellaceae	0.0404916	0.0329535	0.0210055	0.0195744	0.0380071	0.047654	0.0168635	0.00934729	0.0406241	0.0216627	0.0229257	0.0012288	0.00636561	0.00362701	0.0268332	0.0166288	0.0670932	0	0.0211849	0.0394509	0.0215008	0.0318093	0.0300506	0.00882333	0.0233028	0.0165558	0.00621529	0.0141525	0.126562	0	0.016704	0.0508531	0.044905	0.02645	0.0329161	0.0297829	0.0680035	0.0395447	0.0405095	0.0178685	0.0394009	0.0158576	0	0.014765
104	Bacteria	Proteobacteria	Gammaproteobacteria	Enterobacterales	unidentified	0	0	0	0	0	0	0	0	0	0	0	0	0	0	0	0	0	0	0	0	0	0	0	0	0	0	0	0	0	0	0	0	0	0	0	0	0	0	0	0	0	0	0	0
105	Bacteria	Proteobacteria	Gammaproteobacteria	Enterobacterales	Enterobacterales	0	0	0	0	0	0	0	0	0	0	0	0	0	0	0	0	0	0	0	0	0	0	0	0	0	0	0	0	0	0	0	0	0	0	0	0	0	0	0	0	0	0	0	0
106	Bacteria	Proteobacteria	Gammaproteobacteria	Enterobacterales	Enterobacteriaceae	0.00256379	0.00962596	0.00118265	0.0106396	0.000110808	0.0343697	0.0331162	0.00152826	0.000357922	0.000302069	0.00340801	0	0.00399237	0.00481797	0.000288335	0.00279363	0	0.0746858	3.73138e-05	0.00103485	0.126274	0.00595585	0.00111244	0.0027615	0.00152129	0.0315052	0.000208917	0.00131651	0.000781173	0.0204433	0.0104636	0.000534242	0.000687789	0.00043258	0	0.0041064	0.0155958	0.00221942	0.000543471	0.000175828	0.147586	0.00977427	0.0642585	0.0186801
107	Bacteria	Proteobacteria	Gammaproteobacteria	Enterobacterales	Hafniaceae	0	0	0	0.000231525	0	0	0	0	0	0	0	0	0	0	0	0	0	0	0	0	0	0	0	0	0	0	0	0	0	0	0	0	0	0	0	0	0	0	0	0	0	0	0	0.00063973
108	Bacteria	Proteobacteria	Gammaproteobacteria	Enterobacterales	Morganellaceae	0	0	0	0	0	0	0	0	0	0	0	0	0	0	0	0	0	0	0	0	0	0	0	0	0	0	0	0	0	0	0	0	0	0	0	0	0	0	0	0	0	0	0.00815535	0
109	Bacteria	Proteobacteria	Gammaproteobacteria	Enterobacterales	Yersiniaceae	0	0	0	0	0	0	0	0	0	0	0	0	0	0	0	0	0	0	0	0	0	0	0	0	0	0	0	0	0	0	0	0	0	0	0	0	0	0	0	0	0	0	0	0
110	Bacteria	Proteobacteria	Gammaproteobacteria	Oceanospirillales	Nitrincolaceae	0	0	0	0	0	0	0	0	0	0	0	0	0	0	0	0	0	0	0	0	0	0	0	0	0	0	0	0	0	0	0	0	0	0	0	0	0	0	0	0	0	0	0	0
111	Bacteria	Proteobacteria	Gammaproteobacteria	Oceanospirillales	Saccharospirillaceae	0	0	0	0	0	0	0	0	0	0	0	0	0	0	0	0	0	0	0	0	0	0	0	0	0	0	0	0	0	0	0	0	0	0	0	0	0	0	0	0	0	0	0	0
112	Bacteria	Proteobacteria	Gammaproteobacteria	Pasteurellales	Pasteurellaceae	0.00105807	0.000241319	0.000470373	4.20955e-05	6.9255e-05	8.47937e-05	0.0137249	0.000284328	0.000430832	0.010033	0.000595879	0	0.000155259	0.000866152	0.00284731	0.000305969	0.000637349	0.000162331	0.000923516	0	0.000170641	0.0069261	0	0	0.000156394	7.96591e-05	0.000539703	0.000438837	0.00467464	0	0	0	0	0.00260117	0.00111219	0	0.0117859	0.00335913	9.7546e-05	0.000175828	0.0166382	0.000478461	0.000365584	7.67676e-05
113	Bacteria	Proteobacteria	Gammaproteobacteria	Pseudomonadales	Moraxellaceae	0	0	0	0	0	0	0.000186618	0	0	0	0	0	0	0	0	0	0	0	0	0	0	0	0	0	0	0	0	0	0	0	0	0	0	0	0	0	0	0	0	0	0	0	0	0
114	Bacteria	Proteobacteria	Gammaproteobacteria	Pseudomonadales	Pseudomonadaceae	0	0	0	0	0	0	0	0	0	0	0	0	0	0	0	0	0	0	0	6.3358e-05	0	0	0	0	0	0	0	0	0	0	0	0	0	0	0	0	0	0	0	0	0	0	0	0
115	Bacteria	Proteobacteria	Gammaproteobacteria	Xanthomonadales	Xanthomonadaceae	0	0	0	0	0	0	0	0	0	0	0	0	0	0	0	0	0	0	0	0	0	0	0	0	0	0	0	0	0	0	0	0	0	0	0	0	0	0	0	0	0	0	0	0
116	Bacteria	Spirochaetota	Brachyspirae	Brachyspirales	Brachyspiraceae	0	0	0	0	0	0	0.000712541	0	0	0	0	0	0	0	0	0	0	0	0	0	0	0	0	0	0	0	0	0	0	0	0	0	0	0	0	0	0	0	0	0	0	0	0	0
117	Bacteria	Spirochaetota	Spirochaetia	Spirochaetales	Spirochaetaceae	0	0	0	0	0	0	0	0	0	0	0	0	0	0	0	0	0	0	0	0	0	0	0	0	0	0	0	0	0	0	0	0	0	0	0	0	0	0	0	0	0	0	0	0
118	Bacteria	Sumerlaeota	Sumerlaeia	Sumerlaeales	Sumerlaeaceae	0	0	0	0	0	0	0	0	0	0	0	0	0	0	0	0	0	0	0	0	0	0	0	0	0	0	0	0	0	0	0	0	0	0	0	0	0	0	0	0	0	0	0	0
119	Bacteria	Sva0485	Sva0485	Sva0485	Sva0485	0	0	0	0	0	0	0	0	0	0	0	0	0	0	0	0	0	0	0	0	0	0	0	0	0	0	0	0	0	0	0	0	0	0	0	0	0	0	0	0	0	0	0	0
120	Bacteria	Synergistota	Synergistia	Synergistales	Synergistaceae	0	0	0	0	0	0.000339175	0.000135722	0.000639738	0	0	0	0	0	0.000378942	0	0	0	0	0	0	0	0	0	0	0	0	0	0	0	0	0	0.000333901	0	0	0	0	5.08954e-05	0	0	0	0	0	0	0
121	Bacteria	Verrucomicrobiota	Chlamydiae	Chlamydiales	unidentified	0	0	0	0	0	0	0	0	0	0	0	0	0	0	0	0	0	0	0	0	0	0	0	0	0	0	0	0	0	0	0	0	0	0	0	0	0	0	0	0	0	0	0	0
122	Bacteria	Verrucomicrobiota	Lentisphaeria	Victivallales	Victivallaceae	0	0	0	0.000389384	0.000637146	0	0	0	0	0	0.00180855	0	0.00212926	0.00170524	0.000126147	0	0.000294161	0	0	0.00166843	0	0.000686639	0.000131737	0	0	0.00203131	0	0	0	0	0.00091399	0	0	0	0	0.000392184	0	0	0	0.00182422	0.000148776	0.000427197	0	0.000102357
123	Bacteria	Verrucomicrobiota	Lentisphaeria	Victivallales	vadinBE97	0	0	0.000147832	0	0	0	0	0	0	0	0	0	0	0	0	0	0	0	0	0	0	0.00358246	0	0	0	0	0	0	0	0	0.00144978	0	0	0	0	0	0	0	0	0.000571441	0	0	0	0
124	Bacteria	Verrucomicrobiota	Verrucomicrobiae	Opitutales	Puniceicoccaceae	0	0	0	0.000221001	0	0	0	0.00177705	0	0	0	0	0	0	0	0	0	0	0.000111941	0	0	0.000567223	0	0	0	0	0.00604119	0	0	0	0.0145608	0	0	0	0	0	0	0.000314918	0	0.00314293	0	0	0	0
125	Bacteria	Verrucomicrobiota	Verrucomicrobiae	Verrucomicrobiales	Akkermansiaceae	0.00223823	0	0.000335981	0	0.00103882	0	0.000814332	0	0	0	0	0	0.00845052	0	0.0540989	0.0231206	0.00924156	0	0.0506535	0	0	0	0	0	0	0.075769	0.00717283	0	0	0	0.000378203	0.0013356	0	0.0194376	0.012589	0	0	0.0183252	0	0.0591442	0	0.00791169	0	0.0122316
[truncated: 56 more columns]

## Sheet: SILVA138v_Genus
Supplementary Table S5. Relative bacterial frequency data for 100 individuals measured by 16S metagenome sequencing
	Domain	Phylum	Class	Order	Family	Genus	Candidate 1	Candidate 2	Candidate 3	Candidate 4	Candidate 5	Candidate 6	Candidate 7	Candidate 8	Candidate 9	Candidate 10	Candidate 11	Candidate 12	Candidate 13	Candidate 14	Candidate 15	Candidate 16	Candidate 17	Candidate 18	Candidate 19	Candidate 20	Candidate 21	Candidate 22	Candidate 23	Candidate 24	Candidate 25	Candidate 26	Candidate 27	Candidate 28	Candidate 29	Candidate 30	Candidate 31	Candidate 32	Candidate 33	Candidate 34	Candidate 35	Candidate 36	Candidate 37	Candidate 38	Candidate 39	Candidate 40	Candidate 41	Candidate 42	Candidate 43
0	Bacteria	unidentified	unidentified	unidentified	unidentified	unidentified	0	0	6.9255e-05	0	5.08958e-05	0	0	0	0	0	0	0	0	0	0	0	0	0	0	0	0	0	0	0	0	0	0	0	0	0	0	0	0	0	0	0	0	0	0	0.000102527	0	0	0
1	Bacteria	Actinobacteriota	Actinobacteria	Actinomycetales	Actinomycetaceae	Actinomyces	0	0	0	0	6.9255e-05	0	5.08958e-05	0	0	0	0	0	0	0	0	0	0	0	0	0	0	0	0	0	0	0	0	0	0	0	0	0	0	0	0	0	0	0	0	0	0	0.000102527	0
2	Bacteria	Actinobacteriota	Actinobacteria	Bifidobacteriales	Bifidobacteriaceae	Bifidobacterium	0.00484271	0.0183134	0.00158583	0.00156806	0.00596978	0.054918	0.00144205	0.0163133	0.0206534	0.00379744	0.0124507	0.000327681	0.138136	0.00429016	0.000756879	0.0107222	0.00208364	0.00119043	0.00243472	0.000401267	0	0	0.0043034	0.00208796	0.0149001	0.0502383	0.0107592	0	0.00889049	0.000741774	0.000661855	0.0139905	0.00521192	0.0124367	0.00224804	0.0102199	0.00320641	0.0165407	0.00319115	0.00567045	0	0.00808257	0.0226803
3	Bacteria	Actinobacteriota	Actinobacteria	Corynebacteriales	Corynebacteriaceae	Corynebacterium	0	0	0	0	0	0	0	0	0	0	0	0	0	0	0	0	0	0	0	0	0	0	0	0	0	0	0	0	0	0	0	0	0	0	0	0	0	0	0	0	0	0	0
4	Bacteria	Actinobacteriota	Actinobacteria	Micrococcales	Micrococcaceae	Rothia	0	0.000107253	0	9.47149e-05	0	0	0	0	0.000225358	0.000755173	0	0	0	0	0	0.000226151	0	0	0	0.000211193	0	0.000238831	0	0	0	0	0	0	0.000384386	0	0.000189101	0	0	0.000125221	0	0	0	5.99844e-05	0	0	0.00104143	0	0
5	Bacteria	Actinobacteriota	Coriobacteriia	Coriobacteriales	Atopobiaceae	Atopobium	0	0	0	0	0	0	0	0	0	0	0	0	0	0	0	0	0	0	0	0	0	0	0	0	0	0	0	0	0	0	0	0	0	0	0	0	0	0	0	0	0	0	0
6	Bacteria	Actinobacteriota	Coriobacteriia	Coriobacteriales	Atopobiaceae	Libanicoccus	0	0	0	0	0	0	0	0	0	0	0	0	0	0	0	0	0	0	0	0	0	0	0	0	0	0	0	0	0	0	0	0	0	0	0	0	0	0	0	0	0	0	0
7	Bacteria	Actinobacteriota	Coriobacteriia	Coriobacteriales	Atopobiaceae	Olsenella	0	0	0	0	0	0	0.000101792	0	0	0	0	0	0	0	0.000162188	0	0	0	0	0	0	0	0	0	0	6.63825e-05	0	0	0	0	0	0	0	0	0	0	0	0	0	0	0.000272757	0	0
8	Bacteria	Actinobacteriota	Coriobacteriia	Coriobacteriales	Atopobiaceae	uncultured	0	0	0	0	0	0	0	0	0	0	0	0	0	0	0	0	0	0	0	0	0	0	0	0	0	9.29356e-05	0	0	0	0	0	0	0	0	0	0	0	0	0	0	0	0	0
9	Bacteria	Actinobacteriota	Coriobacteriia	Coriobacteriales	Coriobacteriaceae	Collinsella	0.000732511	0.0066765	0.00170678	0	0.00102497	0	0.00035627	0.00557994	0.00148471	0	0.00958633	0	0.0341569	0.0013669	0	0.00339227	0.000318674	0	7.46276e-05	0.00365364	0.000725225	0.000223904	0.000863608	0	0.00511836	0.00244288	0	0	0.00187233	0.000385722	0.00236377	0.000567632	0.00198695	0	0	0.000807438	0.00106153	0.00310419	0	0.00298908	0.0012646	0.00258027	0
10	Bacteria	Actinobacteriota	Coriobacteriia	Coriobacteriales	Coriobacteriales_Incertae_Sedis	unidentified	0	0	0	0	0	0	0	0	0	0	0	0	2.21798e-05	0	0	0	0	0	0	0	0	0	0	0	0	0	0	0	0	0	0	0	0	0	0	0	0	0	0	0	0	0	0
11	Bacteria	Actinobacteriota	Coriobacteriia	Coriobacteriales	Coriobacteriales_Incertae_Sedis	Raoultibacter	0	0	0	0.000105239	0	0	0	3.5541e-05	0	0	0	0	6.65395e-05	0	0	0	0	0	0	0	0	0	0	0	0	0	0	0	0	0	0	0	0	0	0	0	0	0	0	0	0	0	0
12	Bacteria	Actinobacteriota	Coriobacteriia	Coriobacteriales	Coriobacteriales_Incertae_Sedis	uncultured	0	0	0	0	2.7702e-05	0	0	0	0	0	0.000250896	0	0.00636561	0	0.00165793	0.000891301	0	0	0	0	0	0	0	0	0.000838843	0	0.000121868	0	0	0	0.000157585	0.00010017	0	0	0	0	0	0	0.000418054	0.000175828	0	0	0
13	Bacteria	Actinobacteriota	Coriobacteriia	Coriobacteriales	Eggerthellaceae	unidentified	0	0	0	0	0	0	0	0	0	0	0	0	0	0	0	0	0	0	0	0	0	0	0	0	0	0	0	0	0	0	6.30338e-05	0	0	0	0	0	0	0	0	0	0	0	0
14	Bacteria	Actinobacteriota	Coriobacteriia	Coriobacteriales	Eggerthellaceae	Adlercreutzia	0	0.000214506	0	0	0.00013851	0	0	0	0	0.000151035	0.000710873	0	0.000687575	0	0.00239679	0.000119727	0	0	0	0.000464625	0	0	5.85497e-05	0	0	0.000650549	0	0	0	0	0.000504271	0	0.000611368	0	0	0	0	0	0.000153287	0	0	0	0
15	Bacteria	Actinobacteriota	Coriobacteriia	Coriobacteriales	Eggerthellaceae	Asaccharobacter	0	0	0	0	0	0	0	0	0	0	0	0	0	0	0	0	0	0	0	0	0	0	0	0	0	0	0	0	0	0	0	0	0	0	0	0	0	0	0	0	0	0	0
16	Bacteria	Actinobacteriota	Coriobacteriia	Coriobacteriales	Eggerthellaceae	CHKCI002	0	0	0	0	0	0	0	0	0	0	0	0	0	0	0	0	0	0	0	0	0	0	0	0	0	0	0	0	0	0	0	0	0	0	0	0	0	0	0	0	0	0	0
17	Bacteria	Actinobacteriota	Coriobacteriia	Coriobacteriales	Eggerthellaceae	Eggerthella	0	0.000214506	0	0.000484098	0	0.00107405	0	0	0	0	0	0	0.000243978	0	0	0	0	0	0	0.000147835	0	0	0	0	0.000383877	5.3106e-05	0	0	0	0	0.000126068	0	0	0.000113837	0	0	0	0.000239938	0.000348379	0	0	0.000119615	0.00134985
18	Bacteria	Actinobacteriota	Coriobacteriia	Coriobacteriales	Eggerthellaceae	Enterorhabdus	0	0	0	0	0	0	0	0	0	0	0	0	8.87193e-05	0	0	0	0	0	0	0	0	0	0	0	0	0.000119489	0	0	0	0	0.000472754	0	0	0	0	0	0	0	0	0	0	0	0
19	Bacteria	Actinobacteriota	Coriobacteriia	Coriobacteriales	Eggerthellaceae	Gordonibacter	0	0	0	0	0	0	0	0	5.30254e-05	0	0	0	4.43597e-05	0	0	0	0	0	0	0	0	0	0	0	0	0	0	0	0	0	0	0	0	3.98429e-05	0	0	0	0	6.96757e-05	0	0	0	9.84266e-05
20	Bacteria	Actinobacteriota	Coriobacteriia	Coriobacteriales	Eggerthellaceae	Senegalimassilia	0	0	0.000241906	0	0.000207765	0	5.08958e-05	0.000621968	0.00029164	0	0.00221625	0	0	0	0	0	0	0	0	0.00166843	0	0.000134342	0	0	0	0	0.000121868	0	0	0	0.000850957	0	0	0	0	0	0	0	0	0.000131871	0.000198368	0.000119615	0
21	Bacteria	Actinobacteriota	Coriobacteriia	Coriobacteriales	Eggerthellaceae	Slackia	0	0	0.000120953	0	0	0	0	0	0	0	0	0	0	0	0	0	0	0	0	0	0	0	0	0	0	0	0	0	0	0	0	0	0	0	0	0	0	0	0	0	0	0.0022556	0
22	Bacteria	Actinobacteriota	Coriobacteriia	Coriobacteriales	Eggerthellaceae	uncultured	0.00183128	0	0	0	0.00027702	0	0	0.0013861	0.000417575	0	0	0	0	0	0	0	0	0	0	0.0013094	0	0.000119415	7.31872e-05	0	0	0.000278807	0	0	0	0	0	0	0.00255246	0	0	0	0	0	0	0	0	0.000546812	0
23	Bacteria	Actinobacteriota	Coriobacteriia	Coriobacteriales	uncultured	uncultured	0	0	0	0	5.5404e-05	0	0	8.88526e-05	0	0	0	0	0.00117553	0	0.000144168	0	0	0	0	0	0	0	0	0	0	0	0	0	0	0	0	0	0	0	0	0.000115348	0	0	0	0	0	0	0
24	Bacteria	Bacteroidota	Bacteroidia	Bacteroidales	unidentified	unidentified	0	0	0	0	0	0	0	0	0	0	0	0	2.21798e-05	0	0	0	0	0	0	0	0	0	0	0	0	0	0	0	0.00257911	0	0	0	0	0	0	0	0	0	0	0	0	0	0
25	Bacteria	Bacteroidota	Bacteroidia	Bacteroidales	Bacteroidaceae	Bacteroides	0.126399	0.430379	0.184373	0.265097	0.2121	0.48013	0.173555	0.347076	0.306474	0.286232	0.247823	0.07594	0.232999	0.170754	0.302031	0.279855	0.102172	0.530674	0.425573	0.291341	0.10968	0.066813	0.0512456	0.102916	0.209	0.308307	0.349188	0.0902359	0.553777	0.252915	0.158499	0.274467	0.357406	0.308384	0.145862	0.235518	0.145016	0.163892	0.372417	0.199653	0.0134891	0.274824	0.560103
26	Bacteria	Bacteroidota	Bacteroidia	Bacteroidales	Barnesiellaceae	Barnesiella	0	0	0.00645083	0.00126287	0.000678699	0	0	0.00255895	0.0150526	0.0289339	0.00109767	0	0.0377279	0	0.0315907	0	0.00693729	0	0.00175375	0.0165364	0	0.000134342	4.39123e-05	0.00336768	0.0228905	0	0.0341057	0.00696654	0	0	0.000787923	0.0107516	0.0245006	0	0.00388083	0.00708238	0	0.0258833	0	0.00437372	0	0	0
27	Bacteria	Bacteroidota	Bacteroidia	Bacteroidales	Barnesiellaceae	Coprobacter	0	0	0	0	0.000193914	0.00661391	0	0.0090985	0	0	0.00239397	0	0.00403673	0	0	0	0.00227975	0	0	0.000844773	0	0.000134342	0	0	0	0	0	0.000274273	0.000223192	0	0.000378203	0.00968313	0.00157427	0.0167169	0	0.00809745	0	0.00160458	0	0.00742873	0	0	0
28	Bacteria	Bacteroidota	Bacteroidia	Bacteroidales	Barnesiellaceae	uncultured	0	0	0	0	0	0	0	0	0	0	0	0	0	0	0	0	0.00281904	0	0	0	0	0	0	0	0	0	0	0	0	0.000771445	0.00661855	0	0	0.00856053	0.000828226	0	0	0.00991242	0	0	0	0	0
29	Bacteria	Bacteroidota	Bacteroidia	Bacteroidales	Dysgonomonadaceae	Dysgonomonas	0	0	0	0	0	0	0	0	0	0	0	0	0	0	0	0	0	0	0	0	0	0	0	0	0	0	0	0	0	0	0	0	0	0	0	0	0	0	0	0	0	0	0.000942083
30	Bacteria	Bacteroidota	Bacteroidia	Bacteroidales	Marinifilaceae	unidentified	0	0	0	0	0	0	0	0	0	0	0	0	0	0	0	0	0	0	0	0	0	0	0	0	0	0	0	0	0	0	0	0	0	1.70755e-05	0	0	0	0	0	0	0	0	0
31	Bacteria	Bacteroidota	Bacteroidia	Bacteroidales	Marinifilaceae	Butyricimonas	0	0.00450463	0.00216372	0	0.00217461	0	0.000950054	0.00588204	0.00858349	0	0.00291667	0	0	0.00319394	0.00951506	0	0	0	0.0020336	0.00772967	0.000853206	0.00198528	0.00253228	0	0.00287197	0	0.00426539	0.00329128	0.000173594	0.0025517	0.00538939	0.00347257	0.00753512	0.00450794	0.00863721	0.00336817	0	0	0	0.010242	0.000520717	0.000273406	0
32	Bacteria	Bacteroidota	Bacteroidia	Bacteroidales	Marinifilaceae	Odoribacter	0.0102145	0.00512133	0.00690777	0.00832439	0.00225771	0.00751837	0	0.000124394	0	0	0.00569744	0.00638978	0.00370403	0.00812018	0.00949704	0.000505514	0.00254939	0	0.00162315	0.00375924	0.00157843	0.00361232	0.00140519	0.000606183	0.00433639	0.00277479	0.00405648	0.00389468	0.00027279	0.00557814	0.00545243	0.0117533	0.0090024	0.0117195	0.00354954	0.00532909	0.000458059	0.000179953	0	0.00490121	0.000272757	0	0
33	Bacteria	Bacteroidota	Bacteroidia	Bacteroidales	Marinifilaceae	Sanguibacteroides	0	0	0	0	0	0	0	0	0	0	0	0	0.000820654	0	0	0	0	0	0	0	0	0.000373173	0	0	0	0	0	0	0	0	0.00160736	0	0	0	0	0	0	0	0	0	0	0	0
34	Bacteria	Bacteroidota	Bacteroidia	Bacteroidales	Muribaculaceae	CAG-873	0	0	0	0	0	0	0	0	0	0	0	0	0	0	0	0	0	0	0	0	0	0.00261221	0	0	0	0	0	0	0	0	0	0	0	0	0	0	0	0	0	0	0	0	0
35	Bacteria	Bacteroidota	Bacteroidia	Bacteroidales	Muribaculaceae	Muribaculaceae	0.0161559	0	0	0.0227737	0	0	0.00812636	0.00156381	0	0	0.061386	0.0138445	0	0.00659088	0	0	0.00607933	0	0.0754578	0	0	0.00773215	0.00957288	0	0	0	0	0.0476138	0	0	0.0471178	0	0.0256928	0	0	0.000830507	0	0.000419891	0	0.0161762	0.0116541	0	0
36	Bacteria	Bacteroidota	Bacteroidia	Bacteroidales	Paludibacteraceae	unidentified	0	0	0	0	0	0	0	0	0	0	0	0	0	0	0	0	0	0	0	0	0	0	0	0	0	0	0	0	0	0	0	0	0	0	0	0	0	0	0	0	0	0	0
37	Bacteria	Bacteroidota	Bacteroidia	Bacteroidales	Porphyromonadaceae	Porphyromonas	0	0	0	0	0	0	0	0	0	0	0	0	0	0	0	0	0	0	0	0	0	0	0	0	0	0	0	0	0	0	6.30338e-05	0	0	0	0	0	0	0	0	0	0	0	0
38	Bacteria	Bacteroidota	Bacteroidia	Bacteroidales	Prevotellaceae	unidentified	0	0	0	0	0	0	0	0	0	0	0	0	0	0	0	0	0	0	0	0	0	0	0	0	0	0	0	0	0	0	0.000126068	0	0	0	0	0	0	0	0	0	0	0	0
39	Bacteria	Bacteroidota	Bacteroidia	Bacteroidales	Prevotellaceae	Alloprevotella	0	0	0	0	0	0	0	0	0	0	0	0.0748751	0.000221798	0.0239951	0	0	9.80536e-05	0	0	0	0	0.0500351	0.032378	0.0682966	0	0	0.000383015	0	2.47991e-05	0	0	0	0	0	0	0	0	0.00109472	0	0.0233851	0.0807607	0	0
40	Bacteria	Bacteroidota	Bacteroidia	Bacteroidales	Prevotellaceae	Paraprevotella	0.0117609	0	0	0.027762	0.00401679	0	0.00196797	0	0	0	0	0.00253953	0.00416981	0	0	0	0	0	0.0050187	0.0549736	0.00618574	0.0031048	0.00837261	0	0	0	0.0225457	0	0	0	0.00403416	0.0355938	0.0203739	0.0438101	0	0	0.0140326	0.0123718	4.18054e-05	0.00725291	0.000421533	0.00386186	0
41	Bacteria	Bacteroidota	Bacteroidia	Bacteroidales	Prevotellaceae	Prevotella	0.212103	0.000294946	0.147522	0.11028	0.370223	0.000791408	0.470922	0	1.32564e-05	0	0.0678152	0.257803	2.21798e-05	0.213073	0.000216251	0.0621117	0.456268	0	0.000335824	0.044245	0.354848	0.31981	0.441231	0.249411	0.0437478	0.0650416	0.00247219	0.293417	0	0.146337	0.0106527	0	0.000473811	0.000500882	0.348541	0.0903407	0.414819	0.227566	6.96757e-05	0.0257588	0.428674	0.080501	0.000323402
42	Bacteria	Bacteroidota	Bacteroidia	Bacteroidales	Prevotellaceae	Prevotellaceae_Ga6A1_group	0	0	0	0	0	0	0	0.00309207	0.00951144	0	0	0	2.21798e-05	0	0	0	0	0	0	0	0	0	0	0	0	0	0	0	0	0	0.0219358	0	0.0112492	0	0	0.00256073	0	0.0129566	0	0	0	0	0
43	Bacteria	Bacteroidota	Bacteroidia	Bacteroidales	Prevotellaceae	Prevotellaceae_NK3B31_group	0	0	0	0	0	0	0	0	0	0	0	0	0	0	0	0	7.35402e-05	0	0	0	0	0.00307495	0	0	0	0	0.000139278	0	0	0	0.0406883	0	0	0	0	0	0	0	0	0.0676938	0	0	0
44	Bacteria	Bacteroidota	Bacteroidia	Bacteroidales	Prevotellaceae	Prevotellaceae_UCG-001	0	0	0	0	0	0	0	0	0	0	0	0	0	0	0	0	0	0	0	0	0	0	0	0	0	0	0	0	0	0	0	0	0	0	0	0	0	7.49805e-05	0	0.00507703	0	0	0
45	Bacteria	Bacteroidota	Bacteroidia	Bacteroidales	Prevotellaceae	Prevotellaceae_UCG-003	0	0	0	0	0	0	0	0	0	0	0	0	0	0	0	0	0	0	0	0	0	0.00725449	0	0	0	0	6.96391e-05	0	0	0	0	0	0	0	0	0	0	7.49805e-05	0	0	0	0	0
46	Bacteria	Bacteroidota	Bacteroidia	Bacteroidales	Prevotellaceae	Prevotellaceae_UCG-004	0	0	0	0	0	0	0	0	0	0	0	0	0	0	0	0	0	0	0	0	0	0.000403027	0	0	0	0	0	0	0	0	0	0	0	0	0	0	0	0	0	0	0	0	0
47	Bacteria	Bacteroidota	Bacteroidia	Bacteroidales	Prevotellaceae	uncultured	0	0	0	0	0	0	0	0	0	0	0	0	0	0	0	0	0	0	0	0	0	0.0568865	0	0	0	0	0	0	0	0	0	0	0	0	0	0	0	0.0011697	0	0	0.00342186	0	0
48	Bacteria	Bacteroidota	Bacteroidia	Bacteroidales	Rikenellaceae	Alistipes	0.0283645	0.0147473	0.0242578	0.0153017	0.00623295	0.0115885	0.0147767	0.0504149	0.00512358	0.0701879	0.039558	0.0258868	0.0489287	0.0227906	0.105837	0.0674329	0.0179438	0	0.0177147	0.0698205	0.00345548	0.000761274	0.00846044	0.00255944	0.0847231	0.0479149	0.0787444	0.0223258	0.00251711	0.0523099	0.0191938	0.0770643	0.0574533	0.0577324	0.0229537	0.0462546	0.00506046	0.050147	0.215939	0.0261764	0.00481043	0.0685053	0
49	Bacteria	Bacteroidota	Bacteroidia	Bacteroidales	Rikenellaceae	Rikenellaceae_RC9_gut_group	0	0	0	0.00966092	0	0	0	0	0.0775828	0	0	0	0	0.00908107	0	0	0	0	0	0	0	0.00815011	0	0	0	0	0	0	0	0	0	0	0	0	0	0	0	0.00131966	0	0	0	0	0
50	Bacteria	Bacteroidota	Bacteroidia	Bacteroidales	Rikenellaceae	SP3-e08	0	0	0	0	0	0	0	0	0	0	0	0	0	0	0	0	0	0	0	0	0	0	0	0	0	0	0	0	0	0	0	0	0	0	0	0	0	0	0	0	0	0	0
51	Bacteria	Bacteroidota	Bacteroidia	Bacteroidales	Tannerellaceae	unidentified	0	0	0	0	0	0	0	0	0	0	0	0	0	0	0	0	0	0	0	0	0	0	0	0	0	0	0	0	0	0	0	0	0	0	0	0	0	0	0	0	0	0	0
52	Bacteria	Bacteroidota	Bacteroidia	Bacteroidales	Tannerellaceae	Parabacteroides	0.0997029	0.0948385	0.0312328	0.0249942	0.0151945	0.0234313	0.00383415	0.0169531	0.0153045	0.0591624	0.0498657	0.00450561	0.0470878	0.0277033	0.0402948	0.00569369	0.0157866	0.213032	0.00538251	0.0467159	0.0160829	0.00525428	0.0306069	0.00532094	0.0297149	0.0294606	0.0240777	0.0120132	0.0146935	0.0564045	0.0264742	0.0335237	0.0252189	0.0481871	0.0269055	0.0216393	0.0191003	0.0297373	4.18054e-05	0.0292754	0.0150016	0.0193093	0
53	Bacteria	Bacteroidota	Bacteroidia	Bacteroidales	Tannerellaceae	Tannerellaceae	0	0	0	0	0	0	0	0	2.65127e-05	0	0	0	0	0	0	0	0	0	0	0	0	0	0	0	0	0	0	0	0	0	0	0	0	0	0	0	0	0	0	0	0	0	0
54	Bacteria	Bacteroidota	Bacteroidia	Bacteroidales	uncultured	uncultured	0	0	0	0	0	0	0	0	0	0	0	0	0	0	0	0	0	0	0	0	0	0	0	0	0	0	0	0	0	0	0	0	0	0	0	0	0	0	0	0	0	0	0
55	Bacteria	Bacteroidota	Bacteroidia	Cytophagales	Cyclobacteriaceae	uncultured	0	0	0	0	0	0	0	0	0	0	0	0	0	0	0	0	0	0	0	0	0	0	0	0	0	0	0	0	0	0	0	0	0	0	0	0	0	0	0	0	0	0	0
56	Bacteria	Bacteroidota	Bacteroidia	Flavobacteriales	Flavobacteriaceae	uncultured	0	0	0.000161271	0.000210478	0	0	0	0	0	0	0	0	0	0	0	0	0	0	0	0	0	0	0	0	0	0.00434142	0.00301189	0	0	0	9.45507e-05	0	0	0	0	0	0	0.000989743	0	0	0	0	0
57	Bacteria	Bacteroidota	Bacteroidia	Flavobacteriales	Weeksellaceae	Chryseobacterium	0	0	0	0	0	0	0	0	0	0	0	0	0	0	0	0	0	0	0	0	0	0	0	0	0	0	0	0	0	0	0	0	0	0	0	0	0	0	0	0	0	0	0
58	Bacteria	Campilobacterota	Campylobacteria	Campylobacterales	Campylobacteraceae	Campylobacter	0	0	0	0	0	8.47937e-05	0.000101792	0	0	0	0	0	0	0	0	7.9818e-05	0	0	1.86569e-05	0	0	0	0	0	0	0	0	0	0	0	0	0	4.58526e-05	0	0	0	0	0	0	0	0.000867862	0	0.000267158
59	Bacteria	Chloroflexi	Anaerolineae	Anaerolineales	Anaerolineaceae	uncultured	0	0	0	0	0	0	0	0	0	0	0	0	0	0	0	0	0	0	0	0	0	0	0	0	0	0	0	0	0	0	0	0	0	0	0	0	0	0	0	0	0	0	0
60	Bacteria	Cyanobacteria	Cyanobacteriia	Chloroplast	Chloroplast	Chloroplast	0	0.000294946	0	0	0	0	8.48263e-05	7.1082e-05	0.00014582	0.000151035	0.00010454	0	0.000110899	0	0	6.6515e-05	0	0	0	0	0	0	5.85497e-05	0	5.68707e-05	9.29356e-05	0	0	0	0	9.45507e-05	0	0.00111575	0	0	0	0	0.000824786	0	0.000549463	0	0	0
61	Bacteria	Cyanobacteria	Vampirivibrionia	Gastranaerophilales	Gastranaerophilales	Gastranaerophilales	0	0	0	0	0	0	0	0	0.00196194	0.000496256	0	0	0	0	0.000648754	0	0	0	0	0.00629356	0	0	0	0	0	0	0.017166	0	0	0	0.00157585	0	0	0	0	0.014903	0	0	0	0.0141981	0	0	0
62	Bacteria	Desulfobacterota	Desulfobulbia	Desulfobulbales	Desulfobulbaceae	uncultured	0	0	0	0	0	0	0	0	0	0	0	0	0	0	0	0	0	0	0	0	0	0	0	0	0	0	0	0	0	0	0	0	0	0	0	0	0	0	0	0	0	0	0
63	Bacteria	Desulfobacterota	Desulfovibrionia	Desulfovibrionales	Desulfovibrionaceae	unidentified	0	0	0	0	0	0	0	0	0	0	0	0	0	0	0	0	0	0	0	0.000168955	0	0	0	0	0	0	0	0	0	0	0	0	0	0	0	0	0	0	0	0	0	0	0
64	Bacteria	Desulfobacterota	Desulfovibrionia	Desulfovibrionales	Desulfovibrionaceae	Bilophila	0.00191267	0	0.00221747	0.00455684	0.0027702	0.0133691	0.00108578	0.00312761	0	0	0.00478794	0.00745474	0.0025285	0.00242252	0.00702817	0.00610608	0.00105408	0	0.000988815	0.0067793	0.00341282	5.97077e-05	0.00158084	0.00437799	0.00790503	0.00509818	0.00370828	0.00499177	0.00057038	0.00433196	0.00576759	0.0180307	0.00904825	0.00522511	0.00123051	0.00339124	0.00217396	0.00290924	0.00993576	0.00171432	0.00136378	0.00312708	0
65	Bacteria	Desulfobacterota	Desulfovibrionia	Desulfovibrionales	Desulfovibrionaceae	Desulfovibrio	0	0	0	0	4.1553e-05	0	0	0.00293213	0	0	0.00015681	0.000737282	0.00725281	0.0354716	0	0.00713041	0	0	0	0.0254277	0	0.00929948	0	0	0	0.00114178	0.00111423	0	0	0	0.00236377	0.000200341	0	0.000540725	0	0	0	0.000209945	0	0.00819798	0	0	0
66	Bacteria	Desulfobacterota	Desulfovibrionia	Desulfovibrionales	Desulfovibrionaceae	Lawsonia	0	0	0	0	0	0	0	0	0	0	0	0	0	0	0	0	0	0	0	0	0	0	0	0	0	0	0	0	0	0	0	0	0	0	0	0	0	0	0	0	0	0	0
67	Bacteria	Desulfobacterota	Desulfovibrionia	Desulfovibrionales	Desulfovibrionaceae	Mailhella	0	0	0	0	0	0	0	0	0	0	0	0	0	0	0	0	0	0	0	0	0	0.000895616	0	0	0	0	0	0	0	0	0	0	0	0	0	0	0	0	0	0.000483527	0	0	0
68	Bacteria	Desulfobacterota	Desulfovibrionia	Desulfovibrionales	Desulfovibrionaceae	uncultured	0	0	0	0	0	0	0	0.0019903	0	0	0	0	0	0.00150223	0	0	0	0	0	0	0	0	0.000263474	0	0	0	0	0	0	0	0	0	0	0.000489499	0	0	0	0	0	0.000219785	0	0	0
69	Bacteria	Firmicutes	unidentified	unidentified	unidentified	unidentified	0	0	0	0	0	0	0	0	0	0	0	0	0	0	0	0	0	0	0	0	0	0	0	0	0	0	0	0	0	0	0	0	0	0	0	0	0	0	0	0	0	0	2.81219e-05
70	Bacteria	Firmicutes	Bacilli	unidentified	unidentified	unidentified	0	0	0	0	0	0	0	0	0	0	0	0	0	0	0	0	0	0	0	0	0	0	0	0	0	0	0	0	0	0	0	0	0	0	0	0	0	0	0	0	0	0	0
71	Bacteria	Firmicutes	Bacilli	Acholeplasmatales	Acholeplasmataceae	Anaeroplasma	0	0	0	0	0	0	0	0	0	0	0	0	0	0	0	0	0	0	0	0	0	0.00283612	0	0	0	0	0	0	4.95983e-05	0	0	0	0	0	0	0	0	0	0	0	0	0	0
72	Bacteria	Firmicutes	Bacilli	Bacillales	Bacillaceae	Anaerobacillus	0	0	0	0	0	0	0	0	0	0	0	0	4.43597e-05	0	0	0	0	0	0	0	0	0	0	0	0	0	0	0	0	0	0	0	0	0	0	0	0	0	0	0	0	0	0
73	Bacteria	Firmicutes	Bacilli	Bacillales	Bacillaceae	Bacillus	0	0	0	0	0	0	0	0	0	6.47291e-05	0	0	0	0	0	0	0	0	0	0	0	0	0	0	0	0	0	0	0	0	0	0	0	0	0	4.61393e-05	0	0	0	0	0	0	0
74	Bacteria	Firmicutes	Bacilli	Erysipelotrichales	unidentified	unidentified	0	0	0	0	0	0	0	0	0	0	0	0	0	0	0	0	0	0	0	0	0	0	0	0	0	0	0	0	0	0	0	0	0	0	0	0	0	0	0	0	0	0	0
75	Bacteria	Firmicutes	Bacilli	Erysipelotrichales	Erysipelatoclostridiaceae	unidentified	0	0	0	0	0	0	0	0	0	0	0	0	0	0	0	0	0	0	0	0	0	0	0	0	0	0	0	0	0	0	0	0	0	0	0	0	0	0	0	0	0	0	0
76	Bacteria	Firmicutes	Bacilli	Erysipelotrichales	Erysipelatoclostridiaceae	Asteroleplasma	0	0	0	0	0	0	0	0.00115508	0	0	0.00273895	0	0.000354877	0	0	0	0	0	0	0	0	0	0	0	0	0	0	0	0	0	0	0	0	0	0	0	0	8.99766e-05	0	0	0	0	0
77	Bacteria	Firmicutes	Bacilli	Erysipelotrichales	Erysipelatoclostridiaceae	Candidatus_Stoquefichus	0	0	0	0	0	0	0	0	0	0	0	0	0	0	0	0	0	0	0	0.000422386	0	0	0	0	0	0	0	0	0	0	0	0	0	0	0	0	0	0	0.000668887	0	0	0	0
78	Bacteria	Firmicutes	Bacilli	Erysipelotrichales	Erysipelatoclostridiaceae	Catenibacterium	0	0	0	0	0	0	0	0	0	0	0.00260305	0	0	0	0.00129751	0	0	0	0	0	0.00883068	0.00371681	0	0	0.00440748	0	0.00172357	0	0	0.00142421	0.01122	0	0	0	0	0	0	0.00964249	0	0	0.00580228	0	0
79	Bacteria	Firmicutes	Bacilli	Erysipelotrichales	Erysipelatoclostridiaceae	Coprobacillus	0	0	0	0	0	0	0	0	0	0	0	0	0.000221798	0.000351874	0	0	0	0	0	0	0	0	0	0	0	0	0	0	0	0	0	0	0.000213979	0	0	0	0	4.49883e-05	0	0	0	0	0
80	Bacteria	Firmicutes	Bacilli	Erysipelotrichales	Erysipelatoclostridiaceae	Erysipelatoclostridiaceae	0	0	0	0	0	0	0	0	0	0	0	0	0	0	0.0119118	0	0	0	0	0	0	0.000268685	0	0	0	0	0	0	0	0	0	0	0.000794779	0	0	0	0	0	0	0	0	0	0
81	Bacteria	Firmicutes	Bacilli	Erysipelotrichales	Erysipelatoclostridiaceae	Erysipelatoclostridium	0	0.00289583	0	0.00202058	0	0.00180893	0	0	0	0.000129458	6.27241e-05	0	0.00232888	0	0	0	0.000318674	0.00228616	0	0.00519535	0	0	0	0	0.000440748	0	0	0	0.000136395	0	9.45507e-05	0	0.000320968	0.000341511	0	0	5.81662e-05	0	0.00238291	0	0	0	0.00203884
82	Bacteria	Firmicutes	Bacilli	Erysipelotrichales	Erysipelatoclostridiaceae	Erysipelotrichaceae_UCG-003	0.000488341	0	0.0053085	0.00571447	0.00223001	0	0.000458062	0.000621968	0.00580628	0.0134637	0.000428615	0.00245761	0.000665395	0.00185411	0.000973131	0.00595975	0.00186302	0	0.00012127	0	0.000981187	0.000447808	0.00062941	0.00498417	0	0.00159318	0.00346454	0.00586945	0.00803492	0.00121651	0	0.00320545	0.00129916	0.00887358	0.00222438	0.00346045	0	0	0	0.00136267	0.000272757	0.000717691	0
83	Bacteria	Firmicutes	Bacilli	Erysipelotrichales	Erysipelatoclostridiaceae	UCG-004	0	0	0	0	0	0	0	0	0	0	0	0	0.000266158	0	0	0.00226151	0	0	0.000531721	0	0.00507658	0.000298539	0	0	0	0	0	0	0	0	0	0	0	0.00758723	0	0.000207627	0	0	0	0.000769248	0	0	0
84	Bacteria	Firmicutes	Bacilli	Erysipelotrichales	Erysipelotrichaceae	unidentified	0	0	0	0	0	0	0	0	0	0	0	0	0	0	0	0	0	0	0	0	0	0	0	0	0	0	0	0	0	0	0	0	0	0	0	0	0	0.00262432	0	0	0	0	0
85	Bacteria	Firmicutes	Bacilli	Erysipelotrichales	Erysipelotrichaceae	Dielma	0	0	0	5.26194e-05	0	0	0	0	0.000225358	0	0	0	0	0	0	0	0	0	0	0.000168955	0	0	0	0	0	0	0	0	0	0	0	0.000233731	0	0	0	0	0	0	0	0	0	0	0
86	Bacteria	Firmicutes	Bacilli	Erysipelotrichales	Erysipelotrichaceae	Erysipelotrichaceae	0	0	0	0	0	0	0	0	0	0	0	0	0	0	0	0	0	0	0	0	0	0	0	0	0	0	0	0	0	0	0	0	0	5.69184e-05	0	0	0	0	0	0	0	0	0
87	Bacteria	Firmicutes	Bacilli	Erysipelotrichales	Erysipelotrichaceae	Erysipelotrichaceae_UCG-006	0	0	0	0	0	0	0	0	0	0	0	0	0	0	0	0	0	0	0	0	0	0	0	0	0	0	0	0	0	0	0	0	0	0	0	0	0	0	0	0	0	0	0
88	Bacteria	Firmicutes	Bacilli	Erysipelotrichales	Erysipelotrichaceae	Faecalicoccus	0	0	0	0	2.7702e-05	0	0	0	0	0	0	0	0	0	0	0	0	0	0	0	0	0	0	0	0	0	0	0	0	0	0	0	0	0	0	0	0	0	0	0	0	0	0
89	Bacteria	Firmicutes	Bacilli	Erysipelotrichales	Erysipelotrichaceae	Faecalitalea	0	0.000375385	0	0.000242049	0	0	0	0	0	6.47291e-05	0	0	0	0.000866152	0	0	0	0	0	0.0013094	0	0	0	0	0	0	0	0	7.43974e-05	0	0	0	0	0	0	0	0.000239935	7.49805e-05	0	0	0	0	0.000421828
90	Bacteria	Firmicutes	Bacilli	Erysipelotrichales	Erysipelotrichaceae	Holdemanella	0.0204696	0	0.00608797	0	0	0	0.000916124	0.00735699	0.013263	0	0.0753212	0	0.00352659	0	0	0	0	0	0	0	0.00703895	0.0044333	0.00182968	0	0	0.00297394	0	0	0	0.0041836	0.00148129	0	0	0	0	0	0	0.00707816	0	0.0117805	0.00292593	0.0186429	0
91	Bacteria	Firmicutes	Bacilli	Erysipelotrichales	Erysipelotrichaceae	Holdemania	0.000488341	0.00225231	0.000228467	0.0016312	0.000304722	0.00203505	0	0.000106623	0.000205474	0.000539409	0.000376345	0	0.000221798	0.000270673	0	0.000199545	0.000294161	0	5.59707e-05	0.00494192	0.000170641	0.000179123	0.000307386	0	0	0.000371742	0	0	7.43974e-05	0.000504406	0.000630338	0.00113526	0.00162013	0.00122944	0	0.000322975	0.000145415	0.00151461	0.00124023	0.000329678	0	0.000273406	0.00808504
92	Bacteria	Firmicutes	Bacilli	Erysipelotrichales	Erysipelotrichaceae	Merdibacter	0	0	0	0	5.5404e-05	0	0	0	0	0	0	0	0	0.000175937	0	0	0	0	0	0.000211193	0.000511924	0	0	0	0	0	0	0	0	0	6.30338e-05	0	0	6.83021e-05	0	0	0	0	0	0	0	6.83515e-05	0.000801474
93	Bacteria	Firmicutes	Bacilli	Erysipelotrichales	Erysipelotrichaceae	Solobacterium	0	0	0	0	0	0	0	0	0	0	0	0	0	0	0	0	0	0	0	0	0.00422337	0	0	0	0	0	0	0.00263302	0	0	0	0	0	0	0	0	0	0	0	0	0.00238042	3.41758e-05	0
94	Bacteria	Firmicutes	Bacilli	Erysipelotrichales	Erysipelotrichaceae	Turicibacter	0	0	0	0.000115763	0	0	6.7861e-05	8.88526e-05	5.30254e-05	0.000129458	0	0	0.000243978	0	0	0	0	8.11655e-05	0	4.22386e-05	0	5.97077e-05	0	0	0	0	0	0	8.67969e-05	0	0	0	0	0.000631795	0	0	0.00018904	0.000389899	0.000125416	0	0	0	0
95	Bacteria	Firmicutes	Bacilli	Erysipelotrichales	Erysipelotrichaceae	Clostridium_innocuum_group	0	0	0	0.000168382	0	0.00062182	0	0	0	0	3.13621e-05	0	6.65395e-05	0	0	0	0	0.00104162	0	0	0	0	0	0	0	0	0	0	0	0	0	0.00010017	0	0	0	0	0	0.000149961	0.0005156	0	0	0	0.000224975
96	Bacteria	Firmicutes	Bacilli	Erysipelotrichales	Erysipelotrichaceae	uncultured	0	0	0	0	0	0	0	0	0	0	0	0	0	0	0	0	0	0	0	0	0	0	0	0	0	0	0	0	0	0	0	0	0	0	0	0	0	0	0	0	0	0	0
97	Bacteria	Firmicutes	Bacilli	Izemoplasmatales	Izemoplasmatales	Izemoplasmatales	0	0	0	0	0	0	0	0.0106801	0	0	0	0	0	0	0	0	0	0	0	0	0.000255962	0.000373173	0	0	0	0	0	0	0	0	0.00144978	0	0	0.0121066	0	0	0	0	0	0.00206598	0	0	0
98	Bacteria	Firmicutes	Bacilli	Lactobacillales	Aerococcaceae	Abiotrophia	0	0	0	0	0	0	0	0	0	0	0	0	0	0	0	0	0	0	0	0	0	0	0	0	0	0	0	0	0	0	0	0	0	0	0	0	0	0	0	0	0	0	0
99	Bacteria	Firmicutes	Bacilli	Lactobacillales	Carnobacteriaceae	Granulicatella	0	0.000160879	0	0	0	0	0.000508958	0	0	0	0	0	0	0	0	0	0	0	0	0	0	0	0	0	0	0	8.70489e-05	0	8.67969e-05	0	0	0	0	0	0	0	0	0	0	0	0.000694289	0	0.000267158
100	Bacteria	Firmicutes	Bacilli	Lactobacillales	Enterococcaceae	Enterococcus	0	0	0	0	0	0.000282646	0	0	0.00172995	0.00047468	0	0	0	0	0	0	0	0.000189386	0	0	0	0	0	0	0	0	0	0	0	0	0	0	0	0	0	0	0.000174498	0.000134965	0	0	0	0.000546812	0
101	Bacteria	Firmicutes	Bacilli	Lactobacillales	Lactobacillaceae	Lactobacillus	0	0	0	0.00203111	0	0.00189373	0.000271444	0	8.61663e-05	0	5.22701e-05	0.00106496	0.00465777	0.00125863	0.00019823	0.00421705	0	0	0	0	0.000554584	0.000686639	0	0	0.00481979	0	0.000174098	0	0.000223192	0.00243302	0	0.00013356	0	0.000341511	0	0.00131497	0	0.0092376	0	0	0.0223412	0.000598076	0
102	Bacteria	Firmicutes	Bacilli	Lactobacillales	Lactobacillaceae	Pediococcus	0	0	0	0	0	0	0	0	0	0	0	0	0	0	0	0	0	0	0	0	0	0	0	0	0	0	0.000174098	0	0	0.00032638	0	0	0	0	0	0	0	0	0	0	0	0	0
103	Bacteria	Firmicutes	Bacilli	Lactobacillales	Leuconostocaceae	Leuconostoc	0	0	0	0.00164173	0	0	0.00111971	0	3.97691e-05	0.000151035	0	0	0	0	0	0.000305969	0	0	0	0	0	0	0	0	0	0	0.000417835	0	0	0.000178026	0	0.00010017	0	0	0	0	2.18123e-05	0.000254934	0	0	0.00198368	6.83515e-05	0
104	Bacteria	Firmicutes	Bacilli	Lactobacillales	Leuconostocaceae	Weissella	0	0	0	0.000368336	0	0	0	0.000159935	0	0	0	0	4.43597e-05	0	0	9.3121e-05	0	0	0	0	0	0.000567223	0	0.000471476	0	3.98295e-05	0	0.000219419	0	0.00192861	0	0	0	0.00036997	0	0	0	8.99766e-05	4.18054e-05	0	0.000644697	0.000444285	0
105	Bacteria	Firmicutes	Bacilli	Lactobacillales	Streptococcaceae	Lactococcus	0	0	0	0.00032624	0	0	0.000491992	0	1.32564e-05	0	4.18161e-05	0	0	0	0	0	0	0	0	0	0	0	0	0	0	0	0	0	0	0.00614189	0	0	0	0.000267517	0	0	9.452e-05	0	0	0	0	0	0
106	Bacteria	Firmicutes	Bacilli	Lactobacillales	Streptococcaceae	Streptococcus	0.00272657	0.00595254	0.00866831	0.00161015	0.000470934	0.00333522	0.00746471	0.000995149	0.00762903	0.00377586	0.000846775	0.000819202	0.000133079	0.000649614	0.000540628	0.0178393	0.000196107	0.00163684	0.00012127	0.000443506	0.00127981	0.00102996	0.000117099	0.000808244	0.000483401	0.000703655	0.00682463	0.0012068	0.00150035	0.00489571	0.00040972	0.000400681	0.00136029	0.00193523	0	0.00113041	0.0010688	0.00535361	0.000599211	0.000659355	0.0420789	0.00517763	0.00732575
107	Bacteria	Firmicutes	Bacilli	Mycoplasmatales	Mycoplasmataceae	Mycoplasma	0	0	0	0	0	0	0	0	0	0	0	0	0	0	0	0	0	0	0	0.000105597	0	0	0	0	0	0	0	0	0	0	0	0	0	0	0	0	0	0	0	0	0	0	0
108	Bacteria	Firmicutes	Bacilli	RF39	RF39	RF39	0	0	0	0	0.00128814	0	0.00105185	0.00296768	0.00429506	0.00135931	0	0.00434177	0.000177439	0	0.000450524	6.6515e-05	0.00220621	0	0.00267726	0	0.000298622	0.00250772	0.000936796	0	0	0.00335896	0.000818259	0.00148108	0	0	0.00267894	0	0.00487566	0.000950538	0	0.000807438	0	0	0	0.00896723	0	0	0
109	Bacteria	Firmicutes	Bacilli	Staphylococcales	Gemellaceae	Gemella	0	0	0	0	0	0	0.000101792	0	0	0	0	0	0	0	0	0	0	4.05828e-05	0	0	0	7.46347e-05	0	0	0	0	0	0	0.000161194	0	0	0	0	0	0	0	0	0	0	0	0.00012398	0	0.000126548
110	Bacteria	Firmicutes	Clostridia	unidentified	unidentified	unidentified	0	0	0	2.10478e-05	0.000166212	0	0	0	0	0.000302069	0	0	0.000133079	0	0.000144168	0	9.80536e-05	0	0	0	0	0	0	0	0	0	0	0	0	0	9.45507e-05	0	0	6.83021e-05	0	0	0	0	0	4.3957e-05	0	0	0
111	Bacteria	Firmicutes	Clostridia	Caldicoprobacterales	Caldicoprobacteraceae	Caldicoprobacter	0	0	0	0	0	0	0	0	0	0	0	0	0	0	0	0	0	0	0	0	0	0	0	0	0	0	0	0	0	0	0	0	0	0	0	0	0	0	0	0	0	0	0
112	Bacteria	Firmicutes	Clostridia	Christensenellales	Christensenellaceae	unidentified	0	0	0	0	8.31059e-05	0	0	0	0	0	0	0	8.87193e-05	0	0	0	0	0	0	0	0	0	0	0	0	0	0	0	0	0	0	0	0	0	0	0	0	0	0	0	0	0	0
113	Bacteria	Firmicutes	Clostridia	Christensenellales	Christensenellaceae	Catabacter	0	0	0	0	0	0	0	0	0	0	0	0	0	0	0	0	0	0	0	0	0	0	0	0	0	2.6553e-05	0	0	0	0	0	0	0	3.41511e-05	0	0	0	0	0	0	0	0	0
114	Bacteria	Firmicutes	Clostridia	Christensenellales	Christensenellaceae	Christensenella	0	0	0	0	0	0	0	0	0	0	0	0	0.000133079	0.000108269	0	0	0	0	0	0	0	0	0	0	0	0	0	0	0	0	0	0	0	0	0	0	0	7.49805e-05	0	0	0	0	0
115	Bacteria	Firmicutes	Clostridia	Christensenellales	Christensenellaceae	Christensenellaceae	0	0	0	0	0	0	0	0	0	0	4.18161e-05	0	0	0	0	0	0	0	0	0	0	0	0	0	0	0	0	0	0	0	9.45507e-05	0	0	0	0	0	0	0	0	0	0	0	0
116	Bacteria	Firmicutes	Clostridia	Christensenellales	Christensenellaceae	Christensenellaceae_R-7_group	0.0189639	0.000723958	0.00034942	0.000905054	0.00542959	0	0.00154384	0.0559949	0.00153111	0.023173	0.00295849	0.00417793	0.0483964	0.00558939	0.0303833	0.00462944	0.00296612	0	0.0496087	0.00061246	0.00294356	0.00292568	0.00714307	0.000942951	0.00133646	0.000929356	0.0472153	0.00987383	0	0.00884194	0.018595	0	0.0163694	0.00845808	0.000946544	0.00641336	0	0.00584848	0	0.0144838	0	0.00847559	0
117	Bacteria	Firmicutes	Clostridia	Christensenellales	Christensenellaceae	uncultured	0.000447646	0.000160879	0.000510691	0.000410431	0.000720252	0	0	5.33115e-05	6.62818e-05	0	0.000229988	0	0.00224016	9.47354e-05	0.000126147	0	0.000269647	0	5.59707e-05	0	0.000554584	8.95616e-05	0.00045376	0	0.000412313	0.000225701	0.00100977	0	0	0	0.000504271	0	0.000213979	0.000984689	0	0.000346045	0	0.000104973	0.000167222	0.000461549	0	0	0
118	Bacteria	Firmicutes	Clostridia	Clostridia	Hungateiclostridiaceae	unidentified	0	0	0	0	0	0	0	0	0	0	0	0	0	0	0	0.000319272	0	0	0	0	0	0	0	0	0	0	0	0	0	0	0	0	0	0	0	0	0	0	0	0	0	0	0
119	Bacteria	Firmicutes	Clostridia	Clostridia	Hungateiclostridiaceae	Ruminiclostridium	0	0	0	0	0	0	0	0.000266558	0	0	0	0	0	0	0	0	0	0	0	0	0	0	0	0	0	0	0	0	0	0	0	0	0	0	0	0	0	0	0	0	0	0	0
120	Bacteria	Firmicutes	Clostridia	Clostridia_UCG-014	Clostridia_UCG-014	Clostridia_UCG-014	0	0.019091	0	0	0.00322728	0	0.00666735	0.0468075	0.0547819	0.00791853	0	0.07594	0.00175221	0.00102856	0.0177867	0.00123718	0.0197088	0	0.0216606	0	0.00776417	0.0155837	0.0187652	0.00336768	0	0	0.0082	0	0	0	0.038293	0	0.00119217	0.00155387	0.00899217	0.00117655	0	0.000179953	0	0.0280226	0	0	0
121	Bacteria	Firmicutes	Clostridia	Clostridia_vadinBB60_group	Clostridia_vadinBB60_group	Clostridia_vadinBB60_group	0.000325561	0	0.000309102	0	0.00109423	0	0.000458062	0.019281	0.000914689	0	0.000240442	0.00147456	0.0271925	0.00437136	0.00450524	0	0.000637349	0	4.66422e-05	0.00031679	0.00776417	0.00259729	0.000687959	0	0.00663965	0.00102229	0.00362123	0	0	0	0.00601973	0.000701192	0.00181882	0.0100575	0.000283963	0.000299905	0	0.00376402	0.00135171	0.0167696	0	0.00193093	0
122	Bacteria	Firmicutes	Clostridia	Clostridiales	Clostridiaceae	Clostridium_sensu_stricto_1	0	0	0	0.00302035	0	0	0	0	0.0115927	0.000366798	0	0.00294913	8.87193e-05	0.000351874	0	0	0	0.000689907	0.00752806	0	0	0.000865762	0	0.00161649	0.000639795	0.00357138	0.000243737	0.0211739	0	0.000534077	0	0	0	0.000950538	0.00205873	0	0	0.000209945	9.7546e-05	0.000373635	0	0.000256318	8.43656e-05
123	Bacteria	Firmicutes	Clostridia	Clostridiales	Clostridiaceae	Clostridium_sensu_stricto_3	0	0	0	0	0	0	0	0	0	0	0	0	0	0	0	0	0	0	0	0	0	0	0	0	0	0	0	0	0	0	0.000220618	0	0	0	0	0	0	0	0	0	0	0	0
124	Bacteria	Firmicutes	Clostridia	Eubacteriales	Anaerofustaceae	Anaerofustis	0	0	0	0	0	0	0	0	0	0	0	0	0	0	0	0	0	0	0	0	0	0	0	0	0	0	0	0	0	0	0	0	0	0	0	0	0	0	0	0	0	3.41758e-05	0
125	Bacteria	Firmicutes	Clostridia	Eubacteriales	Eubacteriaceae	Eubacterium	0	0	0	0	0	0	0	0	0	0	0	0	0	0	0	0	0	2.70552e-05	0	0.000274551	0	0	0	0	0	0	0	0	0	0	0	0	0	0	0	0	0	0	0	0	0	0	0
126	Bacteria	Firmicutes	Clostridia	Lachnospirales	unidentified	unidentified	0	0	0	0	0	0	0	0	0	0	0	0	0	0	0	0	0	0	0	0	0	0	0	0	0	0	0	0	0	0	0	0	0	0	0	0	0	0	0	0	0	0	0
127	Bacteria	Firmicutes	Clostridia	Lachnospirales	Defluviitaleaceae	Defluviitaleaceae_UCG-011	0	0	0	0.000157858	0	0	0	0.000231017	0	0	0	0	0.000665395	0	0.00127949	0.000172939	0	0	0	8.44773e-05	8.53206e-05	0	0	0	7.10884e-05	0.000106212	0.000156688	0	0	0	0.000189101	0	0	0.000591952	0	0	0	0	0	0	0	0	0
128	Bacteria	Firmicutes	Clostridia	Lachnospirales	Lachnospiraceae	unidentified	0.00508688	0.0034321	0.013157	0.0146071	0.00454313	0.0289146	0.00380022	0.00573988	0.0153045	0.0401968	0.0111963	0.0213812	0.000243978	0.00713222	0.00497378	0.0160168	0.0114478	0.022307	0.0128266	0.0312144	0.00746555	0.00601555	0.00611845	0.0148178	0.00308523	0.00318636	0.0113512	0.0129457	0.0132551	0.00284841	0.00488512	0.01566	0.00626653	0.00568046	0.0106959	0.00922786	0.00710354	0.00274429	0.00911359	0.0120222	0.0113566	0.00678389	0.0400596
129	Bacteria	Firmicutes	Clostridia	Lachnospirales	Lachnospiraceae	Agathobacter	0.0016685	0	0.00595358	0.000999768	0.00101112	0	0.00145901	0	0.00152448	0.024295	0.0219116	0.0273614	0.000665395	0.00663148	0.00598295	0.00208857	0.00245134	0	0.00531721	0.00352693	0.0082761	0.00255251	0.0245909	0.0394693	0.000227483	0.00504507	0.00151465	0	0	0.00388689	0.000346686	0.0116198	0.0108518	0.00897035	0.00175111	0.00989688	0.00207944	0.0286276	0.0181296	0.000703312	0.00146297	0.00032467	0
130	Bacteria	Firmicutes	Clostridia	Lachnospirales	Lachnospiraceae	Anaerostignum	0	0	0	0	0	0	0	0	0	0	0	0	0	0	0	0	0	0	0	0	0	0	0	0	0	0	0	0	0	0	0	0	0	0	0	0	0	0	0.000264768	0	0	0	0.000492133
131	Bacteria	Firmicutes	Clostridia	Lachnospirales	Lachnospiraceae	Anaerostipes	0.00301144	0.00171605	0.00645083	5.26194e-05	0.000443232	0.00641605	0.00305375	0.000781903	0.0118777	0.00375429	0.00200717	0.00983043	0.0116666	0.000203004	0.000540628	0.00449641	0.00580968	0.000351717	0.00193099	0.00401267	0.000639904	0.000403027	0.000614772	0.0102378	0.000625578	0.0019782	0.00584968	0.00493692	0.00616258	0.00032638	0.00954962	0.00701192	0.00195638	0.00148557	0.000544263	0.000230696	0.000618016	0.000164957	0.00107301	0.000417592	0.00109103	0.000290494	0.0077757
132	Bacteria	Firmicutes	Clostridia	Lachnospirales	Lachnospiraceae	Blautia	0.00264518	0.0040488	0.00263409	0.0119551	0.00286716	0.0098078	0.0012215	0.0016882	0.00584605	0.00884631	0.00840503	0.00704514	0.003083	0.00476384	0.00187418	0.00591984	0.00419179	0.00757545	0.00395526	0.00631468	0.00345548	0.00162704	0.00106853	0.00525359	0.00429374	0.0033324	0.00546667	0.00142622	0.00943607	0.00222532	0.002805	0.0117533	0.00559402	0.015533	0.00163279	0.00415254	0.00128693	0.00482874	0.00536503	0.000901119	0.00347145	0.00153791	0.00658052
133	Bacteria	Firmicutes	Clostridia	Lachnospirales	Lachnospiraceae	Butyrivibrio	0	0	0	0	0	0	0	0	0	0	0	0	0.000110899	0	0	0	0	0	0	0	0	0.00574687	0	0	0	0	0	0	0	0	0.0164833	0	0	0	0	0	0	0	0	0	0	0	0
134	Bacteria	Firmicutes	Clostridia	Lachnospirales	Lachnospiraceae	CAG-56	0.00317422	0	0.00350764	0	0.000263169	0	0	0	0.00111353	0.00142404	0.00221625	0	0	0	0.000306356	0	0.000833456	0	0.00173509	0	0.000298622	0	0.000292749	0	0	0	0	0.0106967	0	0	0	0.00186985	0	0	0	0.00101506	0	0	0	0.000857162	0	0.00116198	0
135	Bacteria	Firmicutes	Clostridia	Lachnospirales	Lachnospiraceae	Catenibacillus	0	0	0	0	0	0	0	0	0	0	0	0	0	0	0	0	0	0	0	0	0	0	0	0	0	0	0	0	0	0	0	0	0	0	0	0	0	0	0.000250833	0	0	0	0
136	Bacteria	Firmicutes	Clostridia	Lachnospirales	Lachnospiraceae	Coprococcus	0.000610426	0.00294946	0.00299695	0.00221001	0.0140726	0	0.017067	0.000675279	0.00718495	0.00504887	0.00175628	0.00589826	0.00707537	0.0397753	0.00212647	0.000718362	0.000661862	0	0.011362	0.0107286	0.00204769	0.0247787	0.0258351	0.00612918	0.00126537	0.0118161	0.00344714	0.00603401	0	0.000593419	0.002805	0.00143577	0.00125331	0.00073994	0.000828226	0.00729001	0	0.000119969	0	0.0152311	0.00223164	0.0111584	0
137	Bacteria	Firmicutes	Clostridia	Lachnospirales	Lachnospiraceae	Dorea	0.00215684	0	0.00235187	0.000884006	0.000581742	0.00839457	0.00032234	0.00222131	0.00189566	0.000409951	0.00203853	0.0077005	0.00727499	0.00315334	0.000162188	0.00145003	0.000612835	0	0.000317167	0.00443506	0.000981187	0.00185094	0.000995345	0.00794773	0.00126537	0.000969185	0.00283779	0.0035107	0.00167394	0.000919799	0.00337231	0	0.00453941	0	0.00101753	0.00198399	0.00319914	0.00167956	0	0.000967054	0.00401696	0.00128159	0.0118393
138	Bacteria	Firmicutes	Clostridia	Lachnospirales	Lachnospiraceae	Eisenbergiella	0	0.00882156	0	0	0	0	0	0	0	0	5.22701e-05	0	4.43597e-05	0	0	0	0	0.0014204	0	0.000359029	0	0	0	0	0	0	0.000383015	0	0	0	0	0	0.000366821	0.000455347	0	0	0	0	0.00710692	0	0	6.83515e-05	0.000520255
139	Bacteria	Firmicutes	Clostridia	Lachnospirales	Lachnospiraceae	Epulopiscium	0	0	0	0	0	0	0	0	0	0	0	0	0	0	0	0	0	0	0	0	0	0	0	0	0	0	3.48195e-05	0	0	0	0	0	0	0	0	0	0	0	0.000139351	0	0	0	0
140	Bacteria	Firmicutes	Clostridia	Lachnospirales	Lachnospiraceae	Frisingicoccus	0	0	0	0	0	0	0	0	0	0	0	0	0	0	0	0	0	0	0	0.00194298	0	0	0	0	0	0	0	0	0	0	0	0	0	0.000256133	0	0	0	0	0.00121236	0	0	0	0
141	Bacteria	Firmicutes	Clostridia	Lachnospirales	Lachnospiraceae	Fusicatenibacter	0.00305213	0	0.00857423	0.00561975	0.00454313	0.00093273	0.000203583	0.000213246	0.00447402	0.0132695	0.00196536	0.00516097	0.0334028	0.00255786	0	0.00674462	0.000245134	0	0.000401123	0.00183738	0.00132247	0.000403027	0.00162475	0.0045127	0.000909931	0.00229684	0.00840892	0.00329128	0.000793572	0.00130552	0.000882473	0.00731243	0.00386691	0.00271501	0.000757235	0.000807438	0.000334455	0.000899766	0	0.00248357	0.000545513	0.00140121	0
142	Bacteria	Firmicutes	Clostridia	Lachnospirales	Lachnospiraceae	GCA-900066575	0	0	0.000134392	0.00018943	0.000124659	0	0.000101792	0	0.000245243	0	0.00020908	0	0	6.76682e-05	0.00178407	0.000199545	0	0	0.000848889	0.000274551	0	0	0	0	0	0.000159318	0.000121868	0	0	0	0.000535787	0	0.000275116	0.000204906	0	0.000276836	0	0.000224942	0	0	0	0.000205055	0
143	Bacteria	Firmicutes	Clostridia	Lachnospirales	Lachnospiraceae	GCA-900066755	0	0	0	0	0	0	0	0	0	0	0	0	0	0	0	0	0	0	0	0	0	0	0	0	0	0	0	0	0	0	0	0	0	5.69184e-05	0	0	0	0	0	0	0	0	0
144	Bacteria	Firmicutes	Clostridia	Lachnospirales	Lachnospiraceae	Herbinix	0	0	0	0	0	0	0	0	0	0	0	0	0	0	0	0	0	0	0	0	0	0	0	0	0	0	0.000121868	0	0	0	0	0	0	0	0	0	0	0	0	0	0	0	0
145	Bacteria	Firmicutes	Clostridia	Lachnospirales	Lachnospiraceae	Howardella	0	0	0	0	0.000263169	0	0.000373236	0	0	0	0.000125448	0	0	0	0.00180209	0	0	0	9.32845e-05	0	0.000255962	0.000208977	0	0	0	0.000225701	0	0.000548546	0	0	0	0	0	0	0	0	0	0	0	0	9.91842e-05	0	0
146	Bacteria	Firmicutes	Clostridia	Lachnospirales	Lachnospiraceae	Hungatella	0	0.000134066	0	0.000199954	0	0	0	0	3.97691e-05	0	0	0	0.000177439	0	0	0	0	0.000432883	0	0	0	0	0.000175649	0	0	0	0	0	0	0	0	0	0	6.83021e-05	0	0	0	0	0.00151893	0	0	0	0.0035293
147	Bacteria	Firmicutes	Clostridia	Lachnospirales	Lachnospiraceae	Lachnoclostridium	0.00797623	0.00638155	0.0111814	0.00345183	0.00965414	0.0273318	0.00281623	0.0033764	0.00593885	0.00647291	0.018075	0.0064717	0.000332698	0.00848559	0.00127949	0.00509505	0.0020101	0.0963435	0.00492542	0.0276663	0.00584446	0.00401534	0.0044205	0.0224961	0.0132367	0.00330585	0.00628493	0.00669227	0.00882849	0.00810017	0.0087617	0.0378978	0.0098736	0.00249303	0.00970208	0.0250767	0.0173771	0.00644832	0.0205125	0.00547265	0.012522	0.0050751	0.0440951
148	Bacteria	Firmicutes	Clostridia	Lachnospirales	Lachnospiraceae	Lachnospira	0.0110691	0	0.00221747	0.0301088	0.0126598	0	0.0169822	0.0117285	0.00774834	0.0242303	0.02786	0.0085197	0.000243978	0.01689	0.0202916	0.0214045	0.00737854	0	0.012724	0.00498416	0.0262787	0.00955324	0.00462543	0.0227655	0.0143456	0.000358466	0.00593673	0.0330773	0.00484823	0.0212741	0.0155694	0.00898194	0.0149174	0.0167682	0.0318749	0.0258611	0.00180315	0.00592346	0.00183944	0.0315172	0.00290114	0.0200099	0
149	Bacteria	Firmicutes	Clostridia	Lachnospirales	Lachnospiraceae	Lachnospiraceae	0	0.000214506	0	0	0	0	0	0	0	0	7.31781e-05	0	0	0	0	0	0	0	0	0	0.000938527	0	0	0	0	0	0	0	0	0.00032638	0	0.0013356	0.000229263	0	0	0.000138418	0.000908846	0	0	0	0	0	0
150	Bacteria	Firmicutes	Clostridia	Lachnospirales	Lachnospiraceae	Lachnospiraceae_FCS020_group	0	0	0.000147832	0.000252573	0	0	0	0.000195476	0.000245243	0.000388375	0	0	0.000510136	0	0	0.000545423	0.000343188	0	0.00066232	0	0	0	0	0	0	0.000358466	0	0	0	0	0	0	0	0.000398429	0	0	0	0	0	0	0	0	0
151	Bacteria	Firmicutes	Clostridia	Lachnospirales	Lachnospiraceae	Lachnospiraceae_FE2018_group	0	0	0	0	0	0	0	0	0	0	0	0	0	0	0	0	0	0	0	0	0	0	0	0	0	0	0	0	0	0	0	0	0	4.55347e-05	0	0	0	0	0	0	0	0	0
152	Bacteria	Firmicutes	Clostridia	Lachnospirales	Lachnospiraceae	Lachnospiraceae_NC2004_group	0	0	0	4.20955e-05	0	0	0	0	0	0	0	0	2.21798e-05	0	0	0	0	4.05828e-05	0	0	0	0	0	0	9.95237e-05	0	3.48195e-05	0	0	0	0	6.67802e-05	4.58526e-05	0	0	4.61393e-05	0	0	0	0	0	0	0
153	Bacteria	Firmicutes	Clostridia	Lachnospirales	Lachnospiraceae	Lachnospiraceae_ND3007_group	0	0	0.000403177	0.00256783	0.000221616	0	0	0.000639738	0.00624374	0.00291281	0.000386799	0	0.000998093	0.000568413	0.00230668	0.00367163	0.000784429	0	0.00054105	0.000359029	0.000341282	0	0.000161012	0	0.000270136	0.000424848	0.00464841	0	0	0.000504406	0	0.000801362	0.000703074	0.00036997	0.000165645	0.000576741	0	0.000329914	0	0.00182422	0	0.000119615	0
154	Bacteria	Firmicutes	Clostridia	Lachnospirales	Lachnospiraceae	Lachnospiraceae_NK4A136_group	0.0366663	0.0175895	0.0503165	0.00313612	0.00710556	0.000197852	0.00619232	0.082082	0.0191024	0.0174553	0.00882319	0.0163021	0.000842834	0.0111517	0.0092087	0.00948504	0.0597882	0	0.055383	0.00927138	0.0160829	0.0046572	0.0331538	0.0113154	0.00181986	0.0310272	0.00602378	0.0114646	0	0.0198795	0.0109364	0.0208354	0.0293457	0.00469008	0.0167302	0.0339816	7.27077e-05	0.0203347	0	0.0233851	0.000743882	0.00365681	0.000998327
155	Bacteria	Firmicutes	Clostridia	Lachnospirales	Lachnospiraceae	Lachnospiraceae_UCG-001	0	0	0	0.00697733	0.00249318	0	0.00118757	0	0.0121097	0.00722808	0.00112903	0.00212993	0.000532316	0	0.000738859	0.00568038	0	0	0.0117165	0	0.000639904	0.000477662	0	0	0.0153551	0.000119489	0.000278556	0.000219419	0	0	0.000661855	0.000200341	0.00562459	0.000665946	0	0.00498304	0	0	0.000125416	0.0124618	0	0.00285368	0
156	Bacteria	Firmicutes	Clostridia	Lachnospirales	Lachnospiraceae	Lachnospiraceae_UCG-003	0	0	0	0	0	0	0.00193404	0.00360741	0.00526277	0.00330118	0	0	0	0	0	0.00376475	0	0	0.00144591	0	0	0.000164196	0	0	0	0	0.000470064	0	0	0	0	0.0020368	0	0	0	0	0	0	0	0	0	0	0
157	Bacteria	Firmicutes	Clostridia	Lachnospirales	Lachnospiraceae	Lachnospiraceae_UCG-004	0.00142433	0	0.00540257	0.00372545	0.00261784	0	0.000441097	0.000319869	0.00231323	0.00187714	0.0037739	0.00868354	4.43597e-05	0.000257139	0.00117136	0.00706389	0.000735402	0	0.00295712	0.000654699	0.000853206	0.0017166	0	0.00909275	0.000838843	0.00163301	0	0.00104224	0.000185993	0.0018396	0.00116613	0.00170289	0.00253718	0.0066993	0.00350221	0.000692089	0.000523495	0.00224942	0.000376249	0.00443966	0.00300032	0	0
158	Bacteria	Firmicutes	Clostridia	Lachnospirales	Lachnospiraceae	Lachnospiraceae_UCG-007	0	0	0	0	0	0	0	0	0	0	0	0	0	0	0	0	0	0	0	0	0	0	0	0	0	0	0	0	0	0	0	0	0	0	0	0	0	0	0	0	0	0	0
159	Bacteria	Firmicutes	Clostridia	Lachnospirales	Lachnospiraceae	Lachnospiraceae_UCG-008	0	0	0	0	0	0	0	0.000124394	3.31409e-05	0	4.18161e-05	0	6.65395e-05	0	0	0	0	0	0	0	0	0	0	0	0	0	0	0	0	0	0	0	0	0	0	0	0	0	0	0	0	8.54394e-05	0
160	Bacteria	Firmicutes	Clostridia	Lachnospirales	Lachnospiraceae	Lachnospiraceae_UCG-010	0	0.000375385	0	0.00142072	0.000180063	0.00062182	0.000712541	0.000568656	0.000278384	0.000819902	0.00153674	0.00180224	4.43597e-05	0.000324807	0.00131553	0.000572029	0.00112762	0.000229969	0.00328361	0	0.000725225	0.00150762	0.00184432	0.00289621	0.000369659	0	0.000522293	0.00625343	0	0.00261104	0.000189101	0.00614378	0.00192581	0.000324435	0.00527698	0.000461393	0	0.000569852	0.000362314	0.00129673	0.00396737	0.000375933	0
161	Bacteria	Firmicutes	Clostridia	Lachnospirales	Lachnospiraceae	Lactonifactor	0	0	0	0	0	0	0	0	0	0	0	0	0	0	0	0	0	0	0	0	0	0	0	0	0	0	0	0	0	0	0	0	0	0	0	0	0	0	0	0	0	0	0
162	Bacteria	Firmicutes	Clostridia	Lachnospirales	Lachnospiraceae	Marvinbryantia	0	0	0	0.000315716	0	0	0	0	0.000570023	0	7.31781e-05	0	0.000221798	9.47354e-05	0	0.000186242	0	0	0.00241607	0.000126716	0	0	0	0	0	0.000318636	0	0	0	0	0.00081944	0	0.000351537	0	0	0	0	0	0	0	0	0	0
163	Bacteria	Firmicutes	Clostridia	Lachnospirales	Lachnospiraceae	Moryella	0	0	0	0	0	0	0.000186618	0.000213246	0.000550139	0.000431527	6.27241e-05	0.00139264	0.000110899	0.000676682	0	0.000159636	0	0	0.000587692	0	0.000383943	8.95616e-05	0.000204924	0.000538829	0	0.000172595	0.000400425	0	0	0.000178026	0.000378203	0	0.000519663	0	0.000283963	0.000415254	0	0	0	0.000307699	0	6.83515e-05	0
164	Bacteria	Firmicutes	Clostridia	Lachnospirales	Lachnospiraceae	Oribacterium	0	0	0	0	0	0	0	0	0	0	6.27241e-05	0	0	0	0	0	0	0	0	0	0	0	0	0	0	0	0	0	0	0	0	0	0	0	0	0	0	0	0	0	0	0	0
165	Bacteria	Firmicutes	Clostridia	Lachnospirales	Lachnospiraceae	Roseburia	0.00687747	0.00410243	0.0189762	0.0408011	0.019516	0	0.0135722	0.0038562	0.0191422	0.0310484	0.00392026	0.00516097	0.00153041	0.0113953	0.00711827	0.0111213	0.00139726	0	0.0141326	0.0231257	0.00511924	0.00832923	0.00190287	0.00942951	0.00636952	0.00620013	0.00571041	0.00987383	0.00238072	0.022906	0.00138674	0.00410698	0.00544118	0.0103592	0.00790364	0.00703624	0.000618016	0.0022944	0.0150082	0.0101321	0.000223164	0.00579279	0.0114878
166	Bacteria	Firmicutes	Clostridia	Lachnospirales	Lachnospiraceae	Sellimonas	0	0	0	0	0	0.000706614	0	0	0	0	0	0	0	0	0	0	0	0.00152862	0	0.000802534	0	0	0	0	0.000597142	0	0	0	0	0	0	0	0	0.000119529	0	0	0	0	0.000529536	0	0	0	0.00105457
167	Bacteria	Firmicutes	Clostridia	Lachnospirales	Lachnospiraceae	Shuttleworthia	0	0	0	0	0	0	0	0	0	0	0	0.00188416	0	0	0	0	0	0	0	0	0	0	0	0	0	0	0	0	0	0	0	0	0	9.67613e-05	0	0	0	0	0	0	0	0	0
168	Bacteria	Firmicutes	Clostridia	Lachnospirales	Lachnospiraceae	Tuzzerella	0	0	0	0	0	0	0	0	0	0	0	0	8.87193e-05	0	0	0	0	0	9.32845e-05	0	0	0	0	0	0	0	0	0	0	0	0	0	0	0	0	0	0.000101791	0	0	0	0	0	0
169	Bacteria	Firmicutes	Clostridia	Lachnospirales	Lachnospiraceae	Tyzzerella	0.00024417	0	0.000470373	0.00121025	0.00145435	0.00186546	0	0	0.00163716	0.003107	0.00171446	0	0.000243978	0	0.00322575	0.000412393	0	0	0	0.00650475	0	0	0	0	0.000156394	0.000146042	0	0	0.00105396	0.000593419	0	0.000434071	0.000397389	0	0.00184576	0.00140725	0.00199219	0.0034641	0.00601998	0	0	0	0.00807098
170	Bacteria	Firmicutes	Clostridia	Lachnospirales	Lachnospiraceae	UC5-1-2E3	0	0	0	0	0	0	0	0	0	0	0	0	0	0	0	0	0	0	0	0	0	0	0	0	0	0	0	0	0	0	0	0	0	0.000227674	0	0	0	0	0	0	0	0	0.00763509
171	Bacteria	Firmicutes	Clostridia	Lachnospirales	Lachnospiraceae	Bacteroides_pectinophilus_group	0	0	0	0	0	0	0	0	0	0	0	0	0	0	0	0	0	0	0	0	0	0	0	0	0	0	0	0	0	0	0	0	0	0	0	0	0	0.000389899	0	0	0	0	0
172	Bacteria	Firmicutes	Clostridia	Lachnospirales	Lachnospiraceae	Eubacterium_eligens_group	0.00378464	0.0236761	0.0201051	0.0161542	0.000166212	0.00248728	0.00646376	0.0207204	0.0153111	0.0151035	0	0.00802818	0.000332698	0.00228718	0.00571264	0.0101635	0.0027455	0	0.00125934	0.00927138	0.00221834	0.00631409	0.00531339	0.0546238	0	0.00970513	0.00778217	0.01322	0.000533181	0.00267039	0.00513726	0.00407359	0.0100723	0.0193238	0	0.00286064	0	0.000839782	0.019133	0.0043957	0.000371941	0.00116198	0
173	Bacteria	Firmicutes	Clostridia	Lachnospirales	Lachnospiraceae	Eubacterium_hallii_group	0.000773206	0.000589891	0.000443495	0.00188377	0.00117733	0.0035896	0.000254479	0.000177705	0.00132564	0.000280493	0.00171446	0	0.000487956	0.000649614	0.00135157	0.000438999	0.00093151	0	0.00041978	0.00126716	0.000469263	0.000701566	0.000556222	0	0.00220374	0.000849697	0.00198471	0	0.000657177	0.000504406	0.000315169	0.00200341	0.00209394	0.000796858	0.000283963	0.000484463	0.000319914	0.00287925	0	0.000351656	0.00156215	0.000666427	0.000956144
174	Bacteria	Firmicutes	Clostridia	Lachnospirales	Lachnospiraceae	Eubacterium_oxidoreducens_group	0	0	0	0	0	0	0	0	0	6.47291e-05	0	0	4.43597e-05	4.06009e-05	0	0	0	0	0	0	0	0	0	0	0	0	0	0	0	0	0	0	0	0	4.73272e-05	0	0	0	0	8.7914e-05	0	0	0
175	Bacteria	Firmicutes	Clostridia	Lachnospirales	Lachnospiraceae	Eubacterium_ruminantium_group	0	0	0	0.0115868	0.00182833	0	0.0134874	0	0.00214753	0	0	0.00147456	0.000377057	0	0.000144168	0	0.005491	0	0.00145524	0.0122492	0.020221	0.00161211	0	0	0	0.0253714	0.0033775	0.00905101	0	0.00851556	0.00422327	0	0.00304156	0.012579	0	0.0328973	0	0.00668826	0	0.00145058	0.00116541	0	0
176	Bacteria	Firmicutes	Clostridia	Lachnospirales	Lachnospiraceae	Eubacterium_ventriosum_group	0	0	0.00345388	0.00548294	0.000124659	0.0089316	0.000271444	0.000977378	0.0047988	0.00187714	0.00457886	0.00966658	0.000177439	0.00128569	0.00477555	0.000452302	0.000367701	0	0.000130598	0.00439282	0	0.000164196	0	0.00127972	0.0016066	0.000398295	0.000870489	0.056994	0	0.00655728	0.000157585	0	0.000489095	0.000779783	0.00151447	0.00101506	0.000370809	0.0026993	0	0.00120882	0	0.000956921	0.0125705
177	Bacteria	Firmicutes	Clostridia	Lachnospirales	Lachnospiraceae	Eubacterium_xylanophilum_group	0	0	0	0	0	0	0	0.00447817	0.00206799	0.017671	0.00180855	0	0.000155259	0	0.00324377	0.00770244	0	0	0.00170711	0	0	0	0	0	0.00287197	0	0.00153206	0	0	0	0.00122916	0.000233731	0	0.00443964	0	0	0	0	0	0.000747269	0	0	0
178	Bacteria	Firmicutes	Clostridia	Lachnospirales	Lachnospiraceae	Ruminococcus_gauvreauii_group	0	0	0.00130361	0	0.000540189	0	0	0.000266558	7.291e-05	0.00105724	0.000595879	0	0.000576676	0.000230072	0	0.00156975	0.00093151	0	0.000475751	0.000337909	0	0.000164196	0.000365936	0.00074089	0	0	0.000243737	0	0.00110356	0	0	0	0.000275116	0	0	0.000784368	0.000138145	0.000194949	0	0	0.000867862	0	0.00113894
179	Bacteria	Firmicutes	Clostridia	Lachnospirales	Lachnospiraceae	Ruminococcus_gnavus_group	0	0.00131385	0	0.000252573	0	0.0122386	0.000101792	0	0	0	0	0	0	0.000568413	0	0	0	0.0155297	0	0.00031679	0.000298622	0.000179123	0	0.00444534	0.000398095	0.000172595	0	0.00104224	0.00336028	0.000148355	0	0.00126882	0	0.000552109	0	0	0.000683452	0.00061484	0.00497485	0	0	0	0.00717108
180	Bacteria	Firmicutes	Clostridia	Lachnospirales	Lachnospiraceae	Ruminococcus_torques_group	0	0.000804397	0.00228467	0.00116815	0.00192529	0.00118711	0.000627714	0.000728591	0.000463973	0.000366798	0.000365891	0.00630786	0.0123542	0.00613073	0.00535222	0.000705059	0.00129921	0.00128512	0	0.00236536	0.00115183	0.00164196	0.00137592	0.00518623	0.00129381	0.00188526	0.00207176	0.0118486	0.00380667	0.000979141	0.00129219	0.00180307	0.00481453	0.00253287	0.000638917	0.00184557	0.000421705	0.000104973	0.000863979	0.00193411	0.00146297	0.00143538	0.00192635
181	Bacteria	Firmicutes	Clostridia	Lachnospirales	Lachnospiraceae	uncultured	0.000488341	0.000214506	0.00118265	0.000420955	0.000526338	0.00101752	0.000135722	0.000888526	0.000941201	0.000755173	0.000878138	0.0012288	0.000443597	0.00207065	7.20838e-05	0.000319272	0.000294161	0.0003923	0.00066232	0.00977825	0	0.000552297	0.000248836	0.00101031	0.000170612	0.00231011	0.000731211	0.000329128	0.000396786	0.000652761	0.00368748	0.00297172	0.00434072	0.000950538	0	0	5.08954e-05	0.0015446	0.0103817	0.00129673	0.000396737	0.000358846	0.00433077
182	Bacteria	Firmicutes	Clostridia	Monoglobales	Monoglobaceae	Monoglobus	0.00272657	0.00608661	0.00198901	0.00224159	0.00271479	0.00392877	0.000559853	0.00559771	0.000596536	0.00504887	0.00426524	0.0141722	0.000487956	0.000717282	0.00104521	0.00163627	0.000661862	0	0.000942173	0.000253432	0.000682565	0.000865762	0.000102462	0	0.000312789	0.000464678	0.000835669	0.00219419	0	0.0132332	0.00330928	0.00233731	0.00108518	0.00576015	0.00153813	0.00101506	0.000705265	0.00550357	0.00465434	0.00600013	0.000297553	0.000341758	0.00441514
183	Bacteria	Firmicutes	Clostridia	Oscillospirales	unidentified	unidentified	0	0	0	0.000178906	0	0	0	0.00033764	0.000914689	0	0	0	0.000643215	0.00014887	7.20838e-05	0.000305969	0	0	0	0	0	5.97077e-05	0.000278111	0	0	6.63825e-05	0.000261147	0	0	0	0	0	0	0	0	0	0	0	0	0	0	0	0
184	Bacteria	Firmicutes	Clostridia	Oscillospirales	Butyricicoccaceae	unidentified	0	0	0	0	0	0	0	0	9.27945e-05	0	0	0	0.00115335	0	0	6.6515e-05	0	0	0	0	0.000341282	7.46347e-05	0	0	0	0	0	0	0	0	0	0	0	0.00140019	0	0	0	0	0	0.000131871	0	0	0
185	Bacteria	Firmicutes	Clostridia	Oscillospirales	Butyricicoccaceae	Butyricicoccus	0.00337769	0.000348572	0.00149176	0.00697733	0.00185603	0.00644432	0.00113667	0.00110177	0.00278384	0.00919153	0.00321984	0.00131072	2.21798e-05	0.00124509	0.000414482	0.000971119	0.000857969	0.00896879	0.00161382	0.00162619	0.00264494	0.00134342	0.00137592	0.00316562	0.00183408	0.00261547	0.0062327	0.000603401	0.00256671	0.00213631	0.00179646	0.000868143	0.00383634	0.000466731	0.00433044	0.00103813	0.00189767	0.00163458	0.00144926	0	0.00481043	0.00165752	0
186	Bacteria	Firmicutes	Clostridia	Oscillospirales	Butyricicoccaceae	UCG-008	0	0	0	0	0	0	0	0	0	0	0	0	0	0	0	0	0	0	0	0	0	0	0	0	0	0	0	0	0	0	0	0	0	0	0	0	0	0	0	0	0	0	0
187	Bacteria	Firmicutes	Clostridia	Oscillospirales	Butyricicoccaceae	UCG-009	0	0	0	0.00135758	0.000249318	0	0	0.000319869	0	0.000215764	0	0	0.000133079	0	0	9.3121e-05	0	0	0	0	0	0.000432881	0.000292749	0	0	9.29356e-05	0	0	0	0.000296709	0.000189101	0	0.000932337	0.000239057	0	0.000322975	0	0	0	6.59355e-05	0	0.000256318	0
188	Bacteria	Firmicutes	Clostridia	Oscillospirales	Butyricicoccaceae	uncultured	0	0	0	0	0	0	0	0	0	0	0	0	2.21798e-05	0	0	0	0	0	0	0	0	0	0	0	0	0	0	0	0	0	0	0	0	0	0	0	0	0	0	0	0	0	0
189	Bacteria	Firmicutes	Clostridia	Oscillospirales	Ethanoligenenaceae	Acetanaerobacterium	0	0	0	4.20955e-05	0	0	0	0	0	0	0	0	0	0	0	0	0	0	0	0	0	0	0	0	0	0	0	0	0	0	0	0	0	1.70755e-05	0	0	0	0	0	0	0	0	0
190	Bacteria	Firmicutes	Clostridia	Oscillospirales	Oscillospiraceae	unidentified	0	0	0.000282224	0.00148387	0.00163442	0	0.000135722	0.000142164	0	0	0.000491339	0.00147456	0.00530098	0	0.00104521	0.000186242	0.000294161	0	0.000457094	0.000274551	0	0.00159718	0	0	0.00142177	0	0.00325563	0.000932529	0	0	0.000598821	0	0.00125331	0.00190677	0	0.00170715	0.000181769	0.000134965	0	0.00441768	0	0.00088857	0
191	Bacteria	Firmicutes	Clostridia	Oscillospirales	Oscillospiraceae	Colidextribacter	0.00174989	0	0.001438	0.00111553	0.00182833	0	0.000203583	0.00126171	0.000225358	0.000582562	0.00304212	0.00294913	0.000709755	0.00220598	0	0.000359181	0.000465755	0.000108221	0.00112874	0.00779303	0.000810546	0.000597077	0.00111244	0.00121237	0.000966802	0.000411572	0.000226327	0.00235875	0.000706775	0.000296709	0.000693372	0.0110855	0.00154371	0.00313621	0.00177477	0.00062288	0.000443517	0.00275928	0.00753891	0.00114288	0.00181011	0.000786043	0.0132454
192	Bacteria	Firmicutes	Clostridia	Oscillospirales	Oscillospiraceae	Flavonifractor	0.000732511	0.00823167	0.000712279	0.00130496	0.00041553	0.024788	0.000135722	0	0.000397691	0.000604138	0.000595879	0	0.00290556	0.000433076	0	0.000252757	0	0.0144339	0	0.0100106	0	0.000283612	0	0	0.00209	0	0.000208917	0	0.00114076	0.000474735	0.0024268	0.0109853	0.00279701	0.00341511	0.000165645	0.000438323	0.00125057	0.00256433	0.00510026	0.000219785	0	0.000939834	0.0173934
193	Bacteria	Firmicutes	Clostridia	Oscillospirales	Oscillospiraceae	Intestinimonas	0.000488341	0	0.000927307	0.000631433	0	0.000282646	0	0.000444263	0.000371178	0	0.000710873	0	0.000576676	0	0.000270314	0.00066515	0	0	0	0.000211193	0	0	0.000175649	0	7.10884e-05	0.000703655	0	0	0	0	0.000252135	0.00183646	0	0.00122944	0	0	0	0.000704817	0.000376249	0	0	0.000119615	0
194	Bacteria	Firmicutes	Clostridia	Oscillospirales	Oscillospiraceae	NK4A214_group	0.000895292	0	0	0.00764034	0.00322728	0	0.00120453	0.00993372	0.0043746	0.00923469	0	0.0119604	0.00161913	0.00914873	0.00441513	0.0139282	0.000171594	0	0.0023601	0	0.00388209	0.00764259	0.00494745	0.00356974	0.00764911	0.00308015	0.00992357	0.00109709	0	0.0122838	0.0119449	0	0.00669448	0.00709773	0.00203507	0.00694396	0	0.00178454	0	0.0124179	0.000743882	0.00363972	0
195	Bacteria	Firmicutes	Clostridia	Oscillospirales	Oscillospiraceae	Oscillibacter	0.00362186	0.0183403	0.00186805	0.00251521	0.00152361	0.00771622	0.000152687	0.00520676	0.00243254	0.00176926	0.00366936	0.00786434	0.00299428	0.00315334	0	0.00361842	0	0	0.00246271	0.0176135	0.00174907	0.00102996	0.00120027	0.00222267	0.00500462	0.00366432	0.00128832	0.00466264	0	0.00442097	0.00649248	0.0103509	0.00446299	0.0104161	0.00132516	0.00269915	0.000247206	0.0132266	0.0210281	0.00109893	0	0.00187967	0
196	Bacteria	Firmicutes	Clostridia	Oscillospirales	Oscillospiraceae	Oscillospira	0.000366256	0	0.000120953	0.000221001	0.000221616	0.00276993	0	0.000621968	0	0	0.00163083	0	0	0.000230072	0	0.000505514	0	0	0	0.00225977	0.000725225	0	0.000409848	0	5.68707e-05	0	0.000121868	0	0	0	0.0018595	0	6.11368e-05	0.00182139	0	0.000138418	0	0.000569852	0	0.000505506	0	0	0
197	Bacteria	Firmicutes	Clostridia	Oscillospirales	Oscillospiraceae	Oscillospiraceae	0	0	0	0	0	0	0	0	0	0	0	0	0	0	0	0	0	0	0	0	0	0	0	0	0	0	0	0	0	0	0	0	0	3.41511e-05	0	0	0	0	0	0	0	0	0
198	Bacteria	Firmicutes	Clostridia	Oscillospirales	Oscillospiraceae	Papillibacter	0	0	0	0	0	0	0	0	0	0	0	0	4.43597e-05	0	0	0	0	0	0	0	0	0	0	0	0	0	0	0	0	0	0	0	0	7.96858e-05	0	0	0	0	0	0	0	0	0
199	Bacteria	Firmicutes	Clostridia	Oscillospirales	Oscillospiraceae	Pseudoflavonifractor	0	0	0	0.000178906	0	0	0	0	0	0	0	0	0	0	0	0	0	0	0	0.000295671	0	0	0	0	0	0	0	0	0	0	0	0.000500851	0	0.000250441	0	0	0.000123603	0	0.000627082	0	0	0	0
200	Bacteria	Firmicutes	Clostridia	Oscillospirales	Oscillospiraceae	UCG-002	0.0383348	0.00927738	0.0492548	0.0176906	0.0130615	0	0.00458062	0.0325023	0.0221182	0.00957991	0.0144161	0.0250676	0.0487513	0.0154689	0.024076	0.0185045	0.0096828	0	0.0105505	0	0.0133527	0.0242563	0.030358	0.0322624	0.0374067	0.0306156	0.0401121	0.0272628	0	0.0317479	0.0523811	0.0179973	0.0456387	0.00163925	0.0240659	0.0212702	0	0.0285826	0	0.0416712	0.00128939	0.0387211	0
201	Bacteria	Firmicutes	Clostridia	Oscillospirales	Oscillospiraceae	UCG-003	0.000651121	0.000563078	0.00206964	0.0060828	0.00407219	0	0.00150991	0.00183036	0.00303571	0.0182968	0.00524792	0.0149095	4.43597e-05	0.00312627	0.000648754	0.00725014	0.00818748	0	0.0116326	0.00359029	0.0035408	0.00594092	0.00513774	0.0237758	0	0	0.0055189	0.00905101	0	0.00311545	0.0022377	0.0175966	0.0157275	0.00167909	0.00676779	0.00415254	0.000225394	8.99766e-05	0	0.00630783	0.00518237	0.00610037	0
202	Bacteria	Firmicutes	Clostridia	Oscillospirales	Oscillospiraceae	UCG-005	0.00423229	0.00321759	0.00344044	0.00408326	0.00578971	0	0.000916124	0.00780125	0.00303571	0.00304227	0.000533155	0.0104858	0.041809	0.016511	0.0566218	0.00993734	0.00343188	0	0.00546647	0.00337909	0.00656969	0.0117624	0.0142715	0	0.00179143	0.00945288	0.0151291	0.00230389	0	0.00186927	0.0107157	0.000300511	0.00995002	0.00400137	0.00205873	0.00913558	0	0.00494871	0.00100333	0.00995626	0	0.00715982	0
203	Bacteria	Firmicutes	Clostridia	Oscillospirales	Oscillospiraceae	UCG-007	0	0	0	8.4191e-05	0	0	0	0.000106623	0	0	0	0	0	0	0	0	0	0	0	0	0	0	0	0	0	0	0	0	0	0	0	0	0	0	0	0	0	0	0	0	0	0	0
204	Bacteria	Firmicutes	Clostridia	Oscillospirales	Oscillospiraceae	V9D2013_group	0	0	0	0	0	0	0	0	0	0	0	0	2.21798e-05	0	0	0	0	0	0	0	0	0	0	0	0	0	0	0	0	0	0	0	0	0	0	0	0	0	0	0	0	0	0
205	Bacteria	Firmicutes	Clostridia	Oscillospirales	Oscillospiraceae	uncultured	0.000895292	0.013782	0.000967625	0.00157858	0.0014405	0.00101752	0	0.00069305	0.000417575	0.000409951	0.00293758	0	0.000731935	0.000676682	0.00210845	0.000412393	0	0	0.000223883	0.00572334	0	0.000761274	0.000995345	0	0.00113741	0.00150025	0.00165393	0.000329128	8.67969e-05	0.00237368	0.0022377	0.000601022	0.000993474	0.00786613	0.000189309	0.00140725	0.000901576	0.0065383	0.000961525	0.000461549	0	0.00213599	0
206	Bacteria	Firmicutes	Clostridia	Oscillospirales	Oscillospirales	Hydrogenoanaerobacterium	0	0	0	4.20955e-05	0	0	0	0.00035541	0	0	0	0	0	0	0	0	0	0	4.66422e-05	0	0	0	0	0	0	0	0.00389979	0	0	0	0.000126068	0	9.17053e-05	0	0	0	0	0	0	0.000219785	0	0	0
207	Bacteria	Firmicutes	Clostridia	Oscillospirales	Ruminococcaceae	unidentified	0	0.0095187	0.000255345	0.00571447	0.000110808	0	0	0.0046381	0.000324781	0.000107882	0.00371118	0.00393217	0.00865014	0.000189471	0.00904651	0	0	0	0.000736947	0	0	0.000955324	0.000117099	0	4.2653e-05	5.3106e-05	0.00135796	0.000493692	0	0.00388689	0.000189101	0.00407359	0.000106989	0.00371677	0	0.00242231	0	0.000374903	0.00179763	0.000527484	0	0.000956921	7.03047e-05
208	Bacteria	Firmicutes	Clostridia	Oscillospirales	Ruminococcaceae	Anaerofilum	0	0	0	0	0	0	0	0.000213246	0	0	0	0	2.21798e-05	0	5.40628e-05	0	0	0	0	0	0	0	0	0	0	5.3106e-05	0	0	0	0	0.000157585	0	0.000259832	3.98429e-05	0	0	0	4.49883e-05	0	0	0	0	0
209	Bacteria	Firmicutes	Clostridia	Oscillospirales	Ruminococcaceae	Anaerotruncus	0.000203475	0.000858024	0.000241906	7.36672e-05	9.69569e-05	0.000197852	0	0.000142164	8.61663e-05	0.000129458	0.00026135	0	0	0.000108269	0	0.000252757	0	0	0	0.000506864	0	0	0	0	7.10884e-05	0.000278807	0.000208917	0	0	0	0.000378203	0.000767972	0.000259832	0.000176447	0	0	0	0.000134965	0.000222962	6.59355e-05	0	0.000102527	0.00445732
210	Bacteria	Firmicutes	Clostridia	Oscillospirales	Ruminococcaceae	Angelakisella	0	0	0	0	0	0	0	0	0	0	0	0	0	0	0	0	0	0	0	0.000359029	0	0	0	0	0	0	0	0	0	0	0	0	0	0	0	0	0	8.99766e-05	0	0	0	0	0
211	Bacteria	Firmicutes	Clostridia	Oscillospirales	Ruminococcaceae	CAG-352	0	0	0.00213684	0	0	0	0	0	0	0	0	0	0	0	0	0	0	0	0	0	0	0	0	0	0	0	0	0	0	0	0	0	0	0	0	0	0	0.000119969	0	0	0	0	0
212	Bacteria	Firmicutes	Clostridia	Oscillospirales	Ruminococcaceae	Candidatus_Soleaferrea	0	5.36265e-05	0	6.31433e-05	4.1553e-05	0	0	0.000764132	0	0	2.0908e-05	0	0.000177439	0	0	0	0	0	0	0.000105597	0	0	5.85497e-05	0	5.68707e-05	0	0	0	0	0	0	0	6.11368e-05	0.000233366	0	0	0	0	0.000292638	0	0	0	0
213	Bacteria	Firmicutes	Clostridia	Oscillospirales	Ruminococcaceae	Caproiciproducens	0	0	0.000107514	0.000221001	0.000207765	0	0	0	0	0	0.000648149	0	0	0.000392475	0	0	0	0	0	0.000380148	0.000170641	0	0	0	0	0	0.000191508	0	0	0.000474735	0.000189101	0.000734582	0.000443242	0	0	0.000253766	0	0	0	0	0	0	0
214	Bacteria	Firmicutes	Clostridia	Oscillospirales	Ruminococcaceae	DTU089	0	0.00252045	9.40746e-05	0	8.31059e-05	0	0	0	0.000139192	0	5.22701e-05	0	0.00221798	0.000338341	7.20838e-05	0	0	0	0	0.000232313	0	0	0	0	0.000170612	0.000212424	0	0.000219419	0	0.000830787	0.000126068	0	0.000213979	0.000119529	0	0	0	0.000224942	0.000850044	0	0	0.000170879	0.00119518
215	Bacteria	Firmicutes	Clostridia	Oscillospirales	Ruminococcaceae	Faecalibacterium	0.128271	0.11712	0.189654	0.0832755	0.132692	0.0291125	0.105626	0.0491532	0.111784	0.112909	0.157762	0.0372737	0.00294992	0.165773	0.0758862	0.190087	0.0271363	0.000108221	0.0453922	0.0647096	0.130327	0.123371	0.125809	0.0765138	0.152257	0.0842527	0.0841763	0.0120132	0.00215752	0.161588	0.127328	0.0440415	0.0309658	0.119688	0.173833	0.140909	0.00322822	0.105857	0.122169	0.0348579	0.00724045	0.185745	0
216	Bacteria	Firmicutes	Clostridia	Oscillospirales	Ruminococcaceae	Fournierella	0	0	0	0	0	0	0.000288409	0.000124394	0	0	0	0	2.21798e-05	0	0	0	0	0.000297607	0	0.00337909	0.00179173	0	0.0021517	0	0	0	0	0	2.47991e-05	0	0	0	0.000336253	0	0	0	0	0.000134965	0	0	0	0	0
217	Bacteria	Firmicutes	Clostridia	Oscillospirales	Ruminococcaceae	Harryflintia	0	0	0	0	0	0	0	0	0	0	0	0	4.43597e-05	0	0	0	0	0	0	0	0	0	0	0	5.68707e-05	0	0	0	0	0	0	0	0	0.000147988	0	0	0	0	0	0	0	0	0
218	Bacteria	Firmicutes	Clostridia	Oscillospirales	Ruminococcaceae	Incertae_Sedis	0.00390673	0.00316396	0.000416616	0.0018943	0.000193914	0.0027134	0	0.00110177	0.000543511	0.000863055	0.000731781	0	0.0145278	0.0013669	0.000252293	0	0.00129921	0.000554631	0.000139927	0.000464625	0.000127981	0	0.00177113	0.000336768	0.000625578	0.000252254	0.0024896	0.0363686	0.00106636	0.000415393	0.00104006	0.00176968	0.00287343	0.00100746	0.000567926	0.000692089	0.00167955	0.000719813	0.00728808	0.000131871	0	0.000461373	0.046612
219	Bacteria	Firmicutes	Clostridia	Oscillospirales	Ruminococcaceae	Negativibacillus	0	0	0	0	0	0	0	0	0	0	0	0	0.000731935	0	0	0	0	0	0	0.00965153	0	0	0.000278111	0	0.00363972	0.000159318	0	0.000603401	4.95983e-05	0	0.000535787	0.000767972	0	0.000261825	0	0.00149953	0	0.000254934	0.000654952	0.00015385	0.000371941	0.00205055	0
220	Bacteria	Firmicutes	Clostridia	Oscillospirales	Ruminococcaceae	Paludicola	0	0	0	0	9.69569e-05	0	0	0	0	0	6.27241e-05	0	0.000199619	0	0	0	0	0	0	0.000295671	0	0	0	0	0	0	0.000261147	0	0	0	0	0	0	6.83021e-05	0	0	0	0.000209945	8.36109e-05	0	0	0	0
221	Bacteria	Firmicutes	Clostridia	Oscillospirales	Ruminococcaceae	Phocea	0	0.000214506	4.03177e-05	0.000263097	0.000124659	0	0	0	0	0	0	0	0	0.000216538	0	0	0	9.46931e-05	0	0.000443506	0	0.000119415	7.31872e-05	0	9.95237e-05	0	0	0	0	0.000178026	0	0.000701192	0.0002904	7.3994e-05	0	0.000253766	0.000530766	0	0	6.59355e-05	0	0	0
222	Bacteria	Firmicutes	Clostridia	Oscillospirales	Ruminococcaceae	Pygmaiobacter	0	0	0	0	0	0	0	0	0	0	0	0	0	0	0	0	0	0	0	0	0	0	0	0	0	0	0	0	0	0	0	0	0	0	0	0	0	0	0	0	0	0	0
223	Bacteria	Firmicutes	Clostridia	Oscillospirales	Ruminococcaceae	Ruminococcaceae	0	0	0	0	0	0	0	0	0	0	0	0	0	0	0	0	0	0	0	0	0	0	0	0	0	0	0	0	0	0	0	0	0	0	0	0	0	0	0	0	0	0	0
224	Bacteria	Firmicutes	Clostridia	Oscillospirales	Ruminococcaceae	Ruminococcus	0.00211614	0.00429012	0.0312865	0.070531	0.0013574	0.00638779	0.00169653	0.0270467	0.0163716	0.0156213	0	0.00401409	0.00130861	0.00177291	0.00636139	0.0266858	0.00218169	0	0.0141046	0.00870116	0.00324218	0.00777693	0.000907521	0.00484946	0.153693	0.0160247	0.00299448	0.0325837	0.000508382	0.0339732	0.0267579	0.0535577	0.0217341	0.0311799	0	0.0038757	0	0.0177704	0.00094759	0.00169234	0.000297553	0.0321936	0
225	Bacteria	Firmicutes	Clostridia	Oscillospirales	Ruminococcaceae	Subdoligranulum	0.0155862	0.00378067	0.0104154	0.00128391	0.0143219	0	0.00341002	0.0277398	0.0144759	0.0140031	0.0135589	0.0132711	0.0130861	0.0148193	0.00801932	0.0162563	0.00686375	0	0.0129386	0	0.00674033	0.00694102	0.00674786	0.00336768	0.01045	0.0039564	0.0228242	0.0157433	0	0.00560781	0.0137414	0.00220375	0.0243783	0.00401844	0.0126364	0.0183865	0.00232665	5.99844e-05	0	0.0143959	0.00101664	0.0311854	0
226	Bacteria	Firmicutes	Clostridia	Oscillospirales	Ruminococcaceae	UBA1819	0.00024417	0.00099209	0.000295663	0.000799815	0.000180063	0.0017524	0	0	0.000238614	0	0.001704	0	0.00184093	0.000514278	0	0.000172939	0	0	4.66422e-05	0.00403379	0.000127981	0.000164196	0.000219561	0.00074089	0.000440748	0.000185871	0	0.000329128	0	0	0	0.00210358	0.00158956	0.000267517	0	0.000115348	0	0.000224942	0.00477976	0	0	0.00032467	0
227	Bacteria	Firmicutes	Clostridia	Oscillospirales	Ruminococcaceae	Eubacterium_siraeum_group	0.018679	0	0.0016799	0	0.00271479	0	0.0020528	0.000817444	0.0246767	0	9.40862e-05	0.0108954	0.0023067	0.0264988	0.00113532	7.9818e-05	0	0	0.00851687	0.0132207	0.000341282	0.0154195	0	0	0	0	0.00121868	0.00159078	0	0	0.0108418	0.0122542	0.0108059	0.00253287	0	0.00380649	0	0.00026993	0	0.00773643	7.43882e-05	0.00234104	0
228	Bacteria	Firmicutes	Clostridia	Oscillospirales	Ruminococcaceae	uncultured	0.00113946	0.0010189	0.00709592	0.00409379	0.00267324	0.00305257	0.00134026	0.00605974	0.00110028	0.00148877	0.000480885	0.0244941	0.00687575	0.00265259	0.00872214	0.000545423	0.00156886	0	0.000615677	0.00200634	0.00179173	0.00635887	0.00562077	0.000673537	0.00597142	0.00106212	0.004631	0.0041141	0	0	0.0151281	0.00400681	0.00386691	0.00282885	0.00222438	0.00689782	0	0.00163458	0.00426415	0.00617596	0	0.00215307	0.000309341
229	Bacteria	Firmicutes	Clostridia	Oscillospirales	UCG-010	UCG-010	0	0	6.71962e-05	0.000568289	0.000567891	0	0	0.00698381	0.000318153	0.000906208	0	0.00630786	0.00621035	0.00014887	0.0100016	0.00852722	0.00330931	0	0.000139927	0	0.00294356	0.0160017	0.000380573	0	0	0	0.00670276	0.000164564	0	0	0.0471178	0	0	0.00135466	0.000520599	0.0012919	0	0.000449883	0	0.0266819	0	0.000615164	0
230	Bacteria	Firmicutes	Clostridia	Oscillospirales	UCG-011	UCG-011	0	0	0	0	0	0	0	3.5541e-05	0	0	0	0	2.21798e-05	0	0	0	0	0	0	0	0	0	0	0	0	0	0	0	0	0	0	0	0	0	0	0	0	0	0	0	0	0	0
231	Bacteria	Firmicutes	Clostridia	Oscillospirales	Clostridium_methylpentosum_group	Clostridium_methylpentosum_group	0	0.000723958	0	0	0	0	0	0	0	0	0	0	8.87193e-05	0	0	0	0	0	0	0	0	0	0	0	0	0	0	0	0	0.000148355	0	0	6.11368e-05	0	0	0	0	0.000134965	0	0	0	0	0
232	Bacteria	Firmicutes	Clostridia	Oscillospirales	Eubacterium_coprostanoligenes_group	Eubacterium_coprostanoligenes_group	0.00293005	0.00332484	0.0385975	0.0224264	0.0225217	0	0.00754954	0.00979155	0.0177304	0.00204976	0.00951316	0.0682395	0.0474648	0.0179862	0.000883026	0.00357851	0.0122077	0	0.00504669	0.00473073	0.00853206	0.0216888	0.0189555	0.0244494	0.0490368	0.0509818	0.0322603	0.00334613	0	0.0062309	0.0486306	0.0043741	0.00472282	0.00119529	0.00352588	0.0558516	3.63539e-05	0.019255	0.00132384	0.0207477	0.000471125	0.0558603	4.21828e-05
233	Bacteria	Firmicutes	Clostridia	Oscillospirales	uncultured	uncultured	0	0	0	3.15716e-05	0	0	0	0.000550886	0	0	0	0	0	0.000108269	0	0	0	0	0	4.22386e-05	0.000127981	0	0	0	0	0	0	0	0	0	0.000756406	0	6.11368e-05	2.27674e-05	0	0	0	0	0	0	0	0	0
234	Bacteria	Firmicutes	Clostridia	Peptococcales	Peptococcaceae	Peptococcus	0	0	0	0	0	0	0.000288409	0	0	0.000388375	0.000742235	0.00212993	2.21798e-05	0	0	0	0.000269647	0	0.000438437	0	0.000511924	0.000403027	0.000219561	0	0	0	0	0	0	0	0.00148129	0	0	0.000398429	0	0.000346045	0	0	0	0	0	0	0
235	Bacteria	Firmicutes	Clostridia	Peptococcales	Peptococcaceae	uncultured	0	0	0	0.000105239	0	0	0	0.000159935	0	0.00211448	0	0.000983043	0.000887193	0.000162404	0	0	0	0	0	0	0	2.98539e-05	0	0	0	0	0	0	0	0	0.000378203	0	0.000275116	0.000108145	0	0	0	0	0	0.000175828	0	6.83515e-05	0
236	Bacteria	Firmicutes	Clostridia	Peptostreptococcales-Tissierellales	Anaerovoracaceae	unidentified	0	0	0	0	0	0	0	0	0	0	0	0	0	0	0	0	0	0	0	0	0	0	0	0	0	0	0	0	0	0	0	0	0	0	0	0	0	0	0	0	0	0	0
237	Bacteria	Firmicutes	Clostridia	Peptostreptococcales-Tissierellales	Anaerovoracaceae	Family_XIII_AD3011_group	0.000651121	0	0.00154551	0.0016733	0.000443232	0	0.000186618	0.000213246	7.291e-05	0	0.000710873	0	0.00317172	0.00215185	0.000846984	0.000492211	0	0	4.66422e-05	0.00168955	0.000341282	0.00170167	0.000395211	0	0	0.000132765	0.000696391	0.000164564	0	0.000563748	0.00236377	0.000267121	0.00273587	0.00049519	0.000567926	0.00064595	0	0.000134965	0	0.00131871	0	0.000854394	0
238	Bacteria	Firmicutes	Clostridia	Peptostreptococcales-Tissierellales	Anaerovoracaceae	Family_XIII_UCG-001	0	0	0.000241906	0.00032624	0.000166212	0	0	8.88526e-05	0.000178961	0	0	0	2.21798e-05	0	0.000270314	0.000332575	0	0	0	0.000485744	0.000170641	7.46347e-05	7.31872e-05	0	0	0	0.000174098	0.000438837	0	0.00032638	0.000189101	0	0.000213979	0.000250441	0.0002603	0.000484463	0	8.99766e-05	0.000334443	0.000505506	4.95921e-05	0	0
239	Bacteria	Firmicutes	Clostridia	Peptostreptococcales-Tissierellales	Anaerovoracaceae	Mogibacterium	0	0	0	0	0	0	0	0	0	0	0	0	0	0	0	0	0	0	0	0	0	0	0	0	0	0	0	0	0	0	0	0	0	0	0	0	0	0	0	0	0	0	0
240	Bacteria	Firmicutes	Clostridia	Peptostreptococcales-Tissierellales	Anaerovoracaceae	Eubacterium_brachy_group	0	0	0	0	0	0.000282646	0	0	0	0	0	0	0.000243978	0	0	0	0	0	0	0	0	0	0	0	7.10884e-05	0	0	0	0	0	0	0	0	0	0	0	0	0	0	0	0	0	0
241	Bacteria	Firmicutes	Clostridia	Peptostreptococcales-Tissierellales	Anaerovoracaceae	Eubacterium_nodatum_group	0	0	0	0	0	0	0	0	0	0	0	0	0	0	0	0	0	0	0	0.000380148	0	0	0	0	0	9.29356e-05	0	0	0	0	0	0	0	8.53777e-05	0	0	0	0	0	0	0	0	0
242	Bacteria	Firmicutes	Clostridia	Peptostreptococcales-Tissierellales	Peptostreptococcaceae	unidentified	0	0	0	0	0	0	0	0	0	0	0	0	2.21798e-05	0	0	0	0	0	0	0	0	0	0	0.000134707	0	0	0	0	0	0	0	0	0	0	0	0	0	0	0	4.3957e-05	0	0	0
243	Bacteria	Firmicutes	Clostridia	Peptostreptococcales-Tissierellales	Peptostreptococcaceae	Intestinibacter	0	0.000160879	0	0	0	0.000339175	0	0	5.96536e-05	0.000107882	0.00010454	0	0.000687575	0	0	0.000172939	0	0.000595214	0	0.00031679	0	0	0	0	0.000255918	0	0	0	0	0	0	0	0	0.000221982	0	0	0	0	0.000139351	0	0	0.000358846	0.000421828
244	Bacteria	Firmicutes	Clostridia	Peptostreptococcales-Tissierellales	Peptostreptococcaceae	Paraclostridium	0	0	0	0	0	0	0	0	0	0	0	0	0	0	0	0	0	0	0	0	0	0	0	0	0	0	0	0	0	0	0	0	0	0	0	0	5.08954e-05	0	0	0	0	0	0
245	Bacteria	Firmicutes	Clostridia	Peptostreptococcales-Tissierellales	Peptostreptococcaceae	Peptoclostridium	0	0	0	0	0	0	0	0	0	0	0	0	0	0	0	0	0	0	0	0	0	0	0	0	0	0	0	0	0	0	0	0	0	0	0	0	0	0	0	0	0	0	0
246	Bacteria	Firmicutes	Clostridia	Peptostreptococcales-Tissierellales	Peptostreptococcaceae	Peptostreptococcaceae	0	0	0	0	0	0	0	0	0	0	0	0	0	0	0	0	0	0	0	0	0	0	0	0	0	0	0	0	0	0	0	0	0	0	0	0	0	0	0	0	0	0	0
247	Bacteria	Firmicutes	Clostridia	Peptostreptococcales-Tissierellales	Peptostreptococcaceae	Peptostreptococcus	0	0	0	0	0	0	0.000152687	0	0	0	0	0	0	0	0	0	0	0	0	0	0	0	0	0	0	0	0	0	0	0	0	0	0	0	0	0	0	0	0	0	0	0	8.43656e-05
248	Bacteria	Firmicutes	Clostridia	Peptostreptococcales-Tissierellales	Peptostreptococcaceae	Romboutsia	0	5.36265e-05	0	0.000126287	0.00027702	0	0.000525923	0	0.000192217	0.00023734	0.000324075	0.000655362	0.000709755	0.000406009	0.00019823	0	0.00946218	0.000324662	0	0	0.00162109	0.00117923	0.000380573	0	0.000454966	0	0.000156688	0.0024136	0.000979566	0.000267039	0	0	0.000198695	0.000227674	0	0	0	0	0.000473795	0	0	0.00032467	0.000323402
249	Bacteria	Firmicutes	Clostridia	Peptostreptococcales-Tissierellales	Peptostreptococcaceae	Terrisporobacter	0	0	0	0	0	0	0	0	0	0	0	0	0	0	0	0	0	0	0	8.44773e-05	0	0	0	0	0	6.63825e-05	0	0	0	0	0	0	0	0.000261825	0	0	0	0	0	0	0	0	0
250	Bacteria	Firmicutes	Clostridia	Peptostreptococcales-Tissierellales	Peptostreptococcaceae	uncultured	0	0	0	0	0	0	0	0	0	0	0	0	0	0	0	0	0.000171594	0	0	0	0	0	0	0	0	0	0	0	0	0	0	0	0	0	0	0	0	0	0	0	0	0	0
251	Bacteria	Firmicutes	Clostridia	Peptostreptococcales-Tissierellales	Peptostreptococcales-Tissierellales	Anaerococcus	0	0	0	0	0	0	0	0	0	0	0	0	0	0	0	0	0	0	0	0	0	0	0	0	0	0	0	0	0	0	0	0	0	0	0	0	0	0	0	0	0	0	0
252	Bacteria	Firmicutes	Clostridia	Peptostreptococcales-Tissierellales	Peptostreptococcales-Tissierellales	Fenollaria	0	0	0	0	0	0	0	0	0	0	0	0	2.21798e-05	2.70673e-05	0	7.9818e-05	0	0	0	0	0	0	0	0	5.68707e-05	0	0	0	0	0	0	0	9.17053e-05	0	0	0	0	0	0	0	0	0	0
253	Bacteria	Firmicutes	Clostridia	Peptostreptococcales-Tissierellales	Peptostreptococcales-Tissierellales	Finegoldia	0	0	0	0	0	0	0	0	0	0	0	0	0	0	0	0	0	0	0	0	0	0	0	0	0	0	0	0	0	0	0	0	0	0	0	0	0	0	0	0	0	0	0
254	Bacteria	Firmicutes	Clostridia	Peptostreptococcales-Tissierellales	Peptostreptococcales-Tissierellales	Murdochiella	0	0	0	0	0	0	0	0	0	0	0	0	0	0	0	0	0	0	0	0	0	0	0	0	0	0	0	0	0	0	0	0	0	0	0	0	0	0	0	0	0	0	0
255	Bacteria	Firmicutes	Clostridia	Peptostreptococcales-Tissierellales	Peptostreptococcales-Tissierellales	Peptoniphilus	0	5.36265e-05	0	0	0	0	0	0	0	0	0	0	0	0	0	0	0	0	0	0	0	0	0	0	0	0	0	0	0	0	0	0	0	0	0	0	0	0	0	0	0	0	0
256	Bacteria	Firmicutes	Clostridia	uncultured	uncultured	uncultured	0	0	0	0	0.000484785	0	0	0.000995149	0	0	0	0	2.21798e-05	0	0	0	0	0	0	0	0	0	0	0	0	0	0	0	0	0	0	0	0	2.27674e-05	0	0	0	0	0	0	0	0	0
257	Bacteria	Firmicutes	Incertae_Sedis	DTU014	DTU014	DTU014	0	0	0	7.36672e-05	0	0	0	0.000231017	0	0	0	0	0.000133079	0	0	0	0	0	0	0.000190074	0	0	0	0	0	0	0	0	0	0	0.000157585	0	0	0.000233366	0	0	0	0.000104973	0	0.000241764	0	0	0
258	Bacteria	Firmicutes	Negativicutes	Acidaminococcales	Acidaminococcaceae	Acidaminococcus	0	0	0	0	0	0	0	0	0	0	0	0	0	0.00392475	0	0	0	0	0	0	0	0	0	0	0	0	0	0	0	0	0	0	0	0	0	0.00272222	0	0	0	0	0	0.00167461	0
259	Bacteria	Firmicutes	Negativicutes	Acidaminococcales	Acidaminococcaceae	Phascolarctobacterium	0	0.0637351	0.0230886	0.0391488	0.00454313	0.0972866	0.00466545	0.0170242	0.000861663	0	0.00228943	0	0	0	0.0331766	0	0.000661862	0	0.024879	0.0115523	0.000255962	0.0134044	7.31872e-05	0.125817	0	0	0.00915754	0.0746023	0.056046	0.013708	0.0121025	0.0840429	0.0239656	0.0280494	0.00106486	0.000138418	0	0.000314918	0	0.0261544	0.000272757	0.000427197	0
260	Bacteria	Firmicutes	Negativicutes	Acidaminococcales	Acidaminococcaceae	Succiniclasticum	0	0	0	0	0	0	0	0	0	0	0	0	0	0	0	0	0	0	0	0	0	0	0	0	0	0	0	0	0	0	0	0	0	0	0	0	0	0	0	0	0	0	0
261	Bacteria	Firmicutes	Negativicutes	Veillonellales-Selenomonadales	Selenomonadaceae	Megamonas	0.0165629	0	0.010617	0	0.00799202	0	0	0	0	0.000151035	0	0	0	0.00300447	0	0.00238124	0	0	0	0.00171067	0.000767885	0.00329885	0	0	0.00948319	0.000119489	0	0	0	0.00139453	0.00126068	0	0.00371406	0	0	0.00636722	0	0	0	0	0.000892658	0	0
262	Bacteria	Firmicutes	Negativicutes	Veillonellales-Selenomonadales	Selenomonadaceae	Mitsuokella	0	0	0	0	5.5404e-05	0	0	0	0	0	0	0.00614402	0	0.000338341	0	0.000438999	0	0	0	0	0	0	0	0	0.000213265	0	0	0.0156884	0	0	0.000315169	0	0	0	0	0.00198399	0	4.49883e-05	0	0.00400009	0	0	0
263	Bacteria	Firmicutes	Negativicutes	Veillonellales-Selenomonadales	Selenomonadaceae	Selenomonas	0	0	0	0	0	0	0	0	0	0	0	0	0	0	0	0	0	0	0	0	0	0	0	0	0	0	0	0	0	0	0	0	0	0	0	0	0	0	0	0	0	0	0
264	Bacteria	Firmicutes	Negativicutes	Veillonellales-Selenomonadales	Selenomonadaceae	uncultured	0	0	0	0	0	0	0	0	0	0	0	0	0	0	0	0	0	0	0	0	0	0	0	0	0	0	0	0	0	0	0	0	0	0	0	0	0	0	0.00157467	0	0	0	0
265	Bacteria	Firmicutes	Negativicutes	Veillonellales-Selenomonadales	Veillonellaceae	Allisonella	0	0	0	0	0.000401679	0	0	0	0	0	0.000198626	0	0	6.76682e-05	0	0	0	0	0	0	0.000170641	0	0	0	0	0.000172595	0.000121868	0.000438837	0	0	0	0	0	0	0	0	0	0	0	0	0.000545513	0	0
266	Bacteria	Firmicutes	Negativicutes	Veillonellales-Selenomonadales	Veillonellaceae	Dialister	0.0261669	0	0	0	0	0	0	0	0.0048452	0.0212743	0.0128375	0.00327681	0.00725281	0.0074029	0	0.00650517	0.0138746	0	0.000149255	0	0.00499125	0	0.00420094	0	0.00818938	0.0164894	0.000365605	0	0	0	0	0	0	0.000221982	0.0377908	0.0119962	0.122898	0.00985244	0.0290408	0	0.0323341	0.0131064	0.0566796
267	Bacteria	Firmicutes	Negativicutes	Veillonellales-Selenomonadales	Veillonellaceae	Megasphaera	0	0	0	0	0	0.00166761	0	0	0	0	0	0	0	0.010448	0	0	0	0	0	0	0.000511924	0.000134342	0	0	0	0	0	0	0	0	0.000378203	0	0	0	0	0.0122269	0.0111243	0	0	0	0	0	0.000126548
268	Bacteria	Firmicutes	Negativicutes	Veillonellales-Selenomonadales	Veillonellaceae	Veillonella	0.000529036	0.000536265	0.000241906	4.20955e-05	0	0	0.00420738	0	0.0007291	0.00207133	0.000543609	0	2.21798e-05	0	0.000216251	0.000199545	0	0.00133923	0.000429108	0.000105597	0.000682565	0.000328393	4.39123e-05	0	0	0	0.00207176	0	8.67969e-05	0.011364	0	0.00013356	0	0.000688713	0	0	0.000443517	0.000314918	0.000320508	0.000109893	0.0368469	0.000700603	0.00444326
269	Bacteria	Firmicutes	Negativicutes	Veillonellales-Selenomonadales	Veillonellaceae	uncultured	0	0	0	0	0	0	0	0	0	0	0	0	0	0	0	0	0	0	0	0	0	0	0	0	0.00018483	0	0	0	0	0	0	0	0	0	0	0	0	0	0	0	0	0.000871482	0
270	Bacteria	Firmicutes	uncultured	uncultured	uncultured	uncultured	0.00024417	0	0	0	0	0	0	0	0	0	0	0	0	0	0	0	0	0	0	0	0	0	0	0	0	0	0	0	0	0	0	0	0	2.27674e-05	0	0	0	0	0	0	0	0	0
271	Bacteria	Fusobacteriota	Fusobacteriia	Fusobacteriales	Fusobacteriaceae	Fusobacterium	0	0.00136748	0	0	0	0.00336348	0	0.000604197	0	0	0	0	0	0	0	0	0	0	0	0	0	0	0	0	0	0	0	0	0.14758	0	0.000126068	0.00500851	0	0	0	0	0.108604	0	0.00543471	8.7914e-05	0.00101664	0	0
272	Bacteria	Fusobacteriota	Fusobacteriia	Fusobacteriales	Leptotrichiaceae	Leptotrichia	0	0	0	0	0	0	0.000203583	0	0	0	0	0	0	0	0	0	0	0	0	0	0	0	0	0	0	0	0	0	0	0	0	0	0	0	0	0	0.000407163	0	0	0	0.000619901	0	0
273	Bacteria	Fusobacteriota	Fusobacteriia	Fusobacteriales	Leptotrichiaceae	Sneathia	0	0	0	3.15716e-05	0	0	0	0	0	0	0	0	0	0	0	0	0	0	0	0.000168955	0	0	0	0	0.0002417	0	0	0	0	0	0	0	0	0	0	0	0	0	0	0	0	0	0
274	Bacteria	Patescibacteria	Saccharimonadia	Saccharimonadales	Saccharimonadaceae	Saccharimonadaceae	0	0	0	0	0	0	0	0	0	0	0	0	0	0	0	0	0	0	0	0	0	0	0	0	0	0	0	0	0	0	0	0	0	0	0	0	0	0	0	0	0	0	0
275	Bacteria	Patescibacteria	Saccharimonadia	Saccharimonadales	Saccharimonadaceae	TM7x	0	0.000160879	0	9.47149e-05	5.5404e-05	0.00031091	0	0	1.98845e-05	0	0	0	0	0	0	0	0	0	0	0	0	0	0	0	5.68707e-05	0	0	0	0	0	0	0	0	0	0	0	5.08954e-05	0	0	0	0	6.83515e-05	0
276	Bacteria	Patescibacteria	Saccharimonadia	Saccharimonadales	Saccharimonadales	Saccharimonadales	0	0	0	0	0	0	0	0	0	0	0	0	0	0	0	0	0	0	0	0	0	0	0	0	0	0	0	0	9.91965e-05	0	0	0	0	0	0	0	0	0	0	0	0	0	0
277	Bacteria	Planctomycetota	Phycisphaerae	MSBL9	SG8-4	SG8-4	0	0	0	0	0	0	0	0	0	0	0	0	0	0	0	0	0	0	0	0	0	0	0	0	0	0	0	0	0	0	0	0	0	0	0	0	0	0	0	0	0	0	0
278	Bacteria	Proteobacteria	Alphaproteobacteria	Caulobacterales	Caulobacteraceae	Brevundimonas	0	0	0	0	0	0	0	0	0	0	0	0	0	0	0	0	0	0	0	0	0	0	0	0	0	0	0	0	0	0	0	0	0	0	0	0	0	0	0	0	0	0	0
279	Bacteria	Proteobacteria	Alphaproteobacteria	Caulobacterales	Hyphomonadaceae	Hyphobacterium	0	0	0	0	0	0	0	0	0	0	0	0	0	0	0	0	0	0	0	0	0	0	0	0	0	0	0	0	0	0	0	0	0	0	0	0	0	0	0	0	0	0	0
280	Bacteria	Proteobacteria	Alphaproteobacteria	Kiloniellales	Kiloniellaceae	uncultured	0	0	0	0	0	0	0	0	0	0	0	0	0	0	0	0	0	0	0	0	0	0	0	0	0	0	0	0	0	0	0	0	0	0	0	0	0	0	0	0	0	0	0
281	Bacteria	Proteobacteria	Alphaproteobacteria	Rhizobiales	Beijerinckiaceae	Bosea	0	0	0	0	0	0	0	0	0	0	0	0	2.21798e-05	0	0	0	0	0	0	0	0	0	0	0	0	0	0	0	0	0	0	0	0	0	0	0	0	0	0	0	0	0	0
282	Bacteria	Proteobacteria	Alphaproteobacteria	Rhizobiales	Rhizobiaceae	unidentified	0	0	0	0	0	0	0	0	0	0	0	0	0	0	0	0	0	0	0	0	0	0	0	0	0	0	0	0	0	0	0	0	0	0	0	0	0	0	0	0	0	0	0
283	Bacteria	Proteobacteria	Alphaproteobacteria	Rhizobiales	Rhizobiaceae	Ochrobactrum	0	0	0	0	0	0	0	0	0	0	0	0	0	0	0	0	0	0	0	0	0	0	0	0	0	0	0	0	0	0	0	0	0	0	0	0	0	0	0	0	0	0	0
284	Bacteria	Proteobacteria	Alphaproteobacteria	Rhizobiales	Rhizobiaceae	Pseudochrobactrum	0	0	0	0	0	0	0	0	0	0	0	0	0	0	0	0	0	0	0	0	0	0	0	0	0	0	0	0	0	0	0	0	0	0	0	0	0	0	0	0	0	0	0
285	Bacteria	Proteobacteria	Alphaproteobacteria	Rhizobiales	Xanthobacteraceae	unidentified	0	0	0	0	0	0	0	0	0	0	0	0	0	0	0	0	0	0	0	0	0	0	0	0	0	0	0	0	0	0	0	0	0	0	0	0	0	0	0	0	0	0	0
286	Bacteria	Proteobacteria	Alphaproteobacteria	Rhizobiales	Xanthobacteraceae	Rhodopseudomonas	0	0	0	0	0	0	0	0	0	0	0	0	0	0	0	0	0	0	0	0	0	0	0	0	0	0	0	0	0	0	0	0	0	0	0	0	0	0	0	0	0	0	0
287	Bacteria	Proteobacteria	Alphaproteobacteria	Rhodobacterales	Rhodobacteraceae	Paracoccus	0	0	0	0	0	0	0	0	0	0	0	0	0	0	0	0	0	0	0	0	0	0	0	0	0	0	0	0	0	0	0	0	0	0	0	0	0	0	0	0	0	0	0
288	Bacteria	Proteobacteria	Alphaproteobacteria	Rhodospirillales	uncultured	uncultured	0.0282017	0	0	0	0	0	0	0	0	0	0	0	0	0	0	0.0310891	0.063073	0	0	0	0	0	8.78246e-05	0	0	0	0	0	0	0	0.00091399	0.00290494	0.000366821	0	0	0	0	0.00112471	0	0	0	0	0
289	Bacteria	Proteobacteria	Alphaproteobacteria	Rickettsiales	Mitochondria	Mitochondria	0	0	0	0	0	0	0	0	0	0	0	0	2.21798e-05	0	0	0	0	0	0	0	0	0	0	0	0	0	0	0	0	0	0	0	0.000106989	0	0	0	0	0.000179953	0	0	0	0	0
290	Bacteria	Proteobacteria	Alphaproteobacteria	Sphingomonadales	Sphingomonadaceae	Sphingobium	0	0	0	0	0	0	0	0	0	0	0	0	0	0	0	0	0	0	0	0	0	0	0	0	0	0	0	0	0	0	0	0	0	0	0	0	0	0	0	0	0	0	0
291	Bacteria	Proteobacteria	Gammaproteobacteria	Aeromonadales	Aeromonadaceae	Aeromonas	0	0	0	0	0	0	0	0	0	0	0	0	0	0	0	0	0	0	0	0	0	0	0	0	0	0	0	0	0	0	0	0	0	0	0	0	0	0	0	0	0	0	0
292	Bacteria	Proteobacteria	Gammaproteobacteria	Aeromonadales	Succinivibrionaceae	unidentified	0	0	0	0	0	0	0	0	0	0	0	0	0	0	0	0	0	0	0	0	0	0	0	0	0	0	0	0	0	0	0	0	0	0	0	0	0	0	0	0	0	0	0
293	Bacteria	Proteobacteria	Gammaproteobacteria	Aeromonadales	Succinivibrionaceae	Succinatimonas	0	0	0	0	0	0	0	0	0	0	0	0	0	0	0	0	0	0	0	0	0	0.000223904	0	0	0	0	0	0	0	0	0	0	0	0	0	0	0	0	0	0	0	0	0
294	Bacteria	Proteobacteria	Gammaproteobacteria	Aeromonadales	Succinivibrionaceae	Succinivibrio	0	0	0	0	0	0	0	0.00111954	0	0	0	0	0	0	0	0	0	0	0	0	0	0	0	0	0	0	0	0	0	0	0	0	0.001452	0	0	0	0	0	0	0.00169234	0.00265318	0	0
295	Bacteria	Proteobacteria	Gammaproteobacteria	Aeromonadales	Succinivibrionaceae	uncultured	0	0	0	0	0	0	0	0	0	0	0	0	0	0	0	0	0	0	0	0	0	0	0	0	0	0	0	0	0	0	0	0	0	0	0	0	0	0	0	0	0	0	0
296	Bacteria	Proteobacteria	Gammaproteobacteria	Burkholderiales	Burkholderiaceae	Ralstonia	0	0	0	0	0	0	0	0	0	0	0	0	4.43597e-05	0	0	0	0	0	0	0	0	0	4.39123e-05	0	0	3.98295e-05	0	0	0	0	0	0	0	0	0	0	0	0	0	0	0	0	0
297	Bacteria	Proteobacteria	Gammaproteobacteria	Burkholderiales	Comamonadaceae	Comamonas	0.00150572	0	0	0	0	0	0	0	0	0	0	0	0	0	0	0	0	0	0	0	0	0	0	0	0	0	0	0	0	0	0	0	0	0	0	0	0	0	0	0	0	0	0
298	Bacteria	Proteobacteria	Gammaproteobacteria	Burkholderiales	Comamonadaceae	Delftia	0	0	0	0	0	0	0	0	0	0	0	0	0	0	0	0	0	0	0	0	0	0	0	0	0	0	0	0	0	0	0	0	0	0	0	0	0	0	0	0	0	0	0
299	Bacteria	Proteobacteria	Gammaproteobacteria	Burkholderiales	Comamonadaceae	Variovorax	0	0	0	0	4.1553e-05	0	0	0	0	0	0	0	0	0	0	0	0	0	0	0	0	0	2.92749e-05	0	4.2653e-05	0	0	0	0	0	0	0	0	0	0	0	0	0	0	0	0	0	0
300	Bacteria	Proteobacteria	Gammaproteobacteria	Burkholderiales	Neisseriaceae	Neisseria	0	0	0.000120953	0	0	0	0	0	7.95381e-05	0.000129458	0	0	0	0	0	0	0	0	0	0	0	0	0	0	0	0	0	0	0	0	0	0	0	0	0	0	0	0	0	0	0.00012398	0	0
301	Bacteria	Proteobacteria	Gammaproteobacteria	Burkholderiales	Oxalobacteraceae	unidentified	0	0	0	0	0	0	0	5.33115e-05	0	0	0	0	0	0	0	0	0	0	0	0	0	0	0	0	0	0	0.000470064	0	0	0	0	0	0	0	0	0	0	0	0	4.3957e-05	0	0	0
302	Bacteria	Proteobacteria	Gammaproteobacteria	Burkholderiales	Oxalobacteraceae	Oxalobacter	0	0	0	0	0	0	0	0.000568656	0	0	0	0	0	0	0.00171199	0.00079818	0	0	0	6.3358e-05	0	0.000179123	0	0	0	0	0	0	0	0	0.00176495	0	0	0.00043258	0	0.000230696	0	5.99844e-05	0	0.0011209	0	0	0
303	Bacteria	Proteobacteria	Gammaproteobacteria	Burkholderiales	Sutterellaceae	Parasutterella	0	0	0	0.00481994	0.000263169	0	0	0.00934729	0.0123682	0.000668867	0	0	0.00137515	0.00219245	0	0.00654508	0.000294161	0	0	0.00654699	0.000341282	0	0.00502064	0	0.000753537	0.000398295	0.00074862	0.00126166	0	0	0.000787923	0.0508531	0.000810063	0.00309067	0.000307627	0.000230696	0.0202927	0.000464879	0.0405095	0.00709906	0	0.00340049	0
304	Bacteria	Proteobacteria	Gammaproteobacteria	Burkholderiales	Sutterellaceae	Sutterella	0.0404916	0.0329535	0.0210055	0.0147545	0.037744	0.047654	0.0168635	0	0.0282559	0.0209938	0.0229257	0.0012288	0.00499046	0.00143456	0.0268332	0.0100837	0.066799	0	0.0211849	0.0329039	0.0211595	0.0318093	0.02503	0.00882333	0.0225492	0.0161575	0.00546667	0.0128908	0.126562	0	0.015916	0	0.0440949	0.0233593	0.0326084	0.0295522	0.0477108	0.0390798	0	0.0107695	0.0394009	0.0124571	0
305	Bacteria	Proteobacteria	Gammaproteobacteria	Enterobacterales	unidentified	unidentified	0	0	0	0	0	0	0	0	0	0	0	0	0	0	0	0	0	0	0	0	0	0	0	0	0	0	0	0	0	0	0	0	0	0	0	0	0	0	0	0	0	0	0
306	Bacteria	Proteobacteria	Gammaproteobacteria	Enterobacterales	Enterobacterales	Gibbsiella	0	0	0	0	0	0	0	0	0	0	0	0	0	0	0	0	0	0	0	0	0	0	0	0	0	0	0	0	0	0	0	0	0	0	0	0	0	0	0	0	0	0	0
307	Bacteria	Proteobacteria	Gammaproteobacteria	Enterobacterales	Enterobacteriaceae	unidentified	0	0	0	0.0013681	0	0	0.00527619	0	0.000192217	0	0.000459977	0	0	0.000554879	0	0.00013303	0	0.00101457	0	0	0	0.000253758	0	0	0	0	0	0	0.000123996	0.00178026	0	0	0	3.98429e-05	0	0	0.000596203	0	1.39351e-05	0	0.00012398	0.00194802	0
308	Bacteria	Proteobacteria	Gammaproteobacteria	Enterobacterales	Enterobacteriaceae	Citrobacter	0	0	0	0	0.000110808	0	0.0052253	0.000799673	0	0	0	0	0	0.000419543	0	0	0	0	0	0	0	0	0	0	0	0	0	0	0	0.00593419	0	0	0	0	0	0	0	0	0	0	0	0	0
309	Bacteria	Proteobacteria	Gammaproteobacteria	Enterobacterales	Enterobacteriaceae	Enterobacter	0	0.00396836	0	0.00640904	0	0	0.00834691	0	0	0	0.00147402	0	0	0	0	0.000239454	0	0.0104027	0	0	0.00106651	0	0	0	5.68707e-05	0	0	0	0	0.000356051	0	0	0	0.000147988	0	0	0.00358449	0	0	0	0	0.00124742	0.00101239
310	Bacteria	Proteobacteria	Gammaproteobacteria	Enterobacterales	Enterobacteriaceae	Escherichia-Shigella	0.00256379	0.00565759	0.00118265	0.000263097	0	0.0343697	0	0.000728591	0.000165704	0.000302069	0.000491339	0	0.00399237	0.00384355	0.000288335	0.00182251	0	0.062998	3.73138e-05	0.00103485	0.0351094	0.00570209	0.00111244	0.0027615	0.00146442	0.0315052	0	0.00131651	0.000247991	0.00124618	0.0104636	0.000534242	0.000259832	0.000244749	0	0.00366807	0.0106226	0.00221942	0.000529536	0.000175828	0.00773637	0.00123033	0.0632461
311	Bacteria	Proteobacteria	Gammaproteobacteria	Enterobacterales	Enterobacteriaceae	Klebsiella	0	0	0	0.0025994	0	0	0.0142678	0	0	0	0.000982678	0	0	0	0	0	0	0	0	0	0.0900985	0	0	0	0	0	0.000208917	0	0.000111596	0.0103552	0	0	0.000427958	0	0	0.000438323	0.000792514	0	0	0	0.139726	0.00534851	0
312	Bacteria	Proteobacteria	Gammaproteobacteria	Enterobacterales	Enterobacteriaceae	Raoultella	0	0	0	0	0	0	0	0	0	0	0	0	0	0	0	0.000598635	0	0.000270552	0	0	0	0	0	0	0	0	0	0	0.00029759	0.000771445	0	0	0	0	0	0	0	0	0	0	0	0	0
313	Bacteria	Proteobacteria	Gammaproteobacteria	Enterobacterales	Hafniaceae	Hafnia-Obesumbacterium	0	0	0	0.000231525	0	0	0	0	0	0	0	0	0	0	0	0	0	0	0	0	0	0	0	0	0	0	0	0	0	0	0	0	0	0	0	0	0	0	0	0	0	0	0
314	Bacteria	Proteobacteria	Gammaproteobacteria	Enterobacterales	Morganellaceae	Proteus	0	0	0	0	0	0	0	0	0	0	0	0	0	0	0	0	0	0	0	0	0	0	0	0	0	0	0	0	0	0	0	0	0	0	0	0	0	0	0	0	0	0	0.00815535
315	Bacteria	Proteobacteria	Gammaproteobacteria	Enterobacterales	Yersiniaceae	Serratia	0	0	0	0	0	0	0	0	0	0	0	0	0	0	0	0	0	0	0	0	0	0	0	0	0	0	0	0	0	0	0	0	0	0	0	0	0	0	0	0	0	0	0
316	Bacteria	Proteobacteria	Gammaproteobacteria	Oceanospirillales	Nitrincolaceae	uncultured	0	0	0	0	0	0	0	0	0	0	0	0	0	0	0	0	0	0	0	0	0	0	0	0	0	0	0	0	0	0	0	0	0	0	0	0	0	0	0	0	0	0	0
317	Bacteria	Proteobacteria	Gammaproteobacteria	Oceanospirillales	Saccharospirillaceae	Reinekea	0	0	0	0	0	0	0	0	0	0	0	0	0	0	0	0	0	0	0	0	0	0	0	0	0	0	0	0	0	0	0	0	0	0	0	0	0	0	0	0	0	0	0
318	Bacteria	Proteobacteria	Gammaproteobacteria	Pasteurellales	Pasteurellaceae	unidentified	0	0	0	0	0	0	0	0	0	0	0	0	0	0	0	0	0	0	0	0	0	0	0	0	0	0	0	0	0	0	0	0	0	0	0	0	0	0	0	0	0	0	0
319	Bacteria	Proteobacteria	Gammaproteobacteria	Pasteurellales	Pasteurellaceae	Aggregatibacter	0	0	0	0	0	0	0	0	0	0	0	0	0	0	0	0	0	0	0	0	0	0	0	0	0	0	0	0	0	0	0	0	0	0	0	0	0	0	0	0	0	0	0
320	Bacteria	Proteobacteria	Gammaproteobacteria	Pasteurellales	Pasteurellaceae	Haemophilus	0.00105807	0.000241319	0.000470373	4.20955e-05	6.9255e-05	8.47937e-05	0.0137249	0.000284328	0.000430832	0.010033	0.000595879	0	0.000155259	0.000866152	0.00284731	0.000305969	0.000637349	0.000162331	0.000923516	0	0.000170641	0.0069261	0	0	0.000156394	7.96591e-05	0.000539703	0.000438837	0.00467464	0	0	0	0	0.00260117	0.00111219	0	0.0117859	0.00335913	9.7546e-05	0.000175828	0.0166382	0.000478461	0.000365584
321	Bacteria	Proteobacteria	Gammaproteobacteria	Pseudomonadales	Moraxellaceae	Acinetobacter	0	0	0	0	0	0	0.000186618	0	0	0	0	0	0	0	0	0	0	0	0	0	0	0	0	0	0	0	0	0	0	0	0	0	0	0	0	0	0	0	0	0	0	0	0
322	Bacteria	Proteobacteria	Gammaproteobacteria	Pseudomonadales	Moraxellaceae	Enhydrobacter	0	0	0	0	0	0	0	0	0	0	0	0	0	0	0	0	0	0	0	0	0	0	0	0	0	0	0	0	0	0	0	0	0	0	0	0	0	0	0	0	0	0	0
323	Bacteria	Proteobacteria	Gammaproteobacteria	Pseudomonadales	Pseudomonadaceae	Pseudomonas	0	0	0	0	0	0	0	0	0	0	0	0	0	0	0	0	0	0	0	6.3358e-05	0	0	0	0	0	0	0	0	0	0	0	0	0	0	0	0	0	0	0	0	0	0	0
324	Bacteria	Proteobacteria	Gammaproteobacteria	Xanthomonadales	Xanthomonadaceae	Luteimonas	0	0	0	0	0	0	0	0	0	0	0	0	0	0	0	0	0	0	0	0	0	0	0	0	0	0	0	0	0	0	0	0	0	0	0	0	0	0	0	0	0	0	0
325	Bacteria	Spirochaetota	Brachyspirae	Brachyspirales	Brachyspiraceae	Brachyspira	0	0	0	0	0	0	0.000712541	0	0	0	0	0	0	0	0	0	0	0	0	0	0	0	0	0	0	0	0	0	0	0	0	0	0	0	0	0	0	0	0	0	0	0	0
326	Bacteria	Spirochaetota	Spirochaetia	Spirochaetales	Spirochaetaceae	Treponema	0	0	0	0	0	0	0	0	0	0	0	0	0	0	0	0	0	0	0	0	0	0	0	0	0	0	0	0	0	0	0	0	0	0	0	0	0	0	0	0	0	0	0
327	Bacteria	Sumerlaeota	Sumerlaeia	Sumerlaeales	Sumerlaeaceae	Sumerlaea	0	0	0	0	0	0	0	0	0	0	0	0	0	0	0	0	0	0	0	0	0	0	0	0	0	0	0	0	0	0	0	0	0	0	0	0	0	0	0	0	0	0	0
328	Bacteria	Sva0485	Sva0485	Sva0485	Sva0485	Sva0485	0	0	0	0	0	0	0	0	0	0	0	0	0	0	0	0	0	0	0	0	0	0	0	0	0	0	0	0	0	0	0	0	0	0	0	0	0	0	0	0	0	0	0
329	Bacteria	Synergistota	Synergistia	Synergistales	Synergistaceae	Cloacibacillus	0	0	0	0	0	0	0	0.000639738	0	0	0	0	0	8.12018e-05	0	0	0	0	0	0	0	0	0	0	0	0	0	0	0	0	0	0.000333901	0	0	0	0	0	0	0	0	0	0	0
330	Bacteria	Synergistota	Synergistia	Synergistales	Synergistaceae	Fretibacterium	0	0	0	0	0	0.000339175	0	0	0	0	0	0	0	0	0	0	0	0	0	0	0	0	0	0	0	0	0	0	0	0	0	0	0	0	0	0	0	0	0	0	0	0	0
331	Bacteria	Synergistota	Synergistia	Synergistales	Synergistaceae	Pyramidobacter	0	0	0	0	0	0	0.000135722	0	0	0	0	0	0	0.00029774	0	0	0	0	0	0	0	0	0	0	0	0	0	0	0	0	0	0	0	0	0	0	5.08954e-05	0	0	0	0	0	0
332	Bacteria	Verrucomicrobiota	Chlamydiae	Chlamydiales	unidentified	unidentified	0	0	0	0	0	0	0	0	0	0	0	0	0	0	0	0	0	0	0	0	0	0	0	0	0	0	0	0	0	0	0	0	0	0	0	0	0	0	0	0	0	0	0
333	Bacteria	Verrucomicrobiota	Lentisphaeria	Victivallales	Victivallaceae	unidentified	0	0	0	0	0	0	0	0	0	0	0	0	0	0	0	0	0	0	0	0	0	0	0	0	0	0	0	0	0	0	0	0	0	0	0	0	0	0	0	0	0	0	0
334	Bacteria	Verrucomicrobiota	Lentisphaeria	Victivallales	Victivallaceae	Victivallaceae	0	0	0	0	0	0	0	0	0	0	0	0	0.00153041	0	0	0	0	0	0	0	0	0.000641858	0	0	0	0	0	0	0	0	0.000598821	0	0	0	0	0	0	0	0	0.00120882	0	0	0
335	Bacteria	Verrucomicrobiota	Lentisphaeria	Victivallales	Victivallaceae	Victivallis	0	0	0	0.000389384	0.000637146	0	0	0	0	0	0.00180855	0	0.000598856	0.00170524	0.000126147	0	0.000294161	0	0	0.00166843	0	4.47808e-05	0.000131737	0	0	0.00203131	0	0	0	0	0.000315169	0	0	0	0	0.000392184	0	0	0	0.000615398	0.000148776	0.000427197	0
336	Bacteria	Verrucomicrobiota	Lentisphaeria	Victivallales	vadinBE97	vadinBE97	0	0	0.000147832	0	0	0	0	0	0	0	0	0	0	0	0	0	0	0	0	0	0	0.00358246	0	0	0	0	0	0	0	0	0.00144978	0	0	0	0	0	0	0	0	0.000571441	0	0	0
337	Bacteria	Verrucomicrobiota	Verrucomicrobiae	Opitutales	Puniceicoccaceae	uncultured	0	0	0	0.000221001	0	0	0	0.00177705	0	0	0	0	0	0	0	0	0	0	0.000111941	0	0	0.000567223	0	0	0	0	0.00604119	0	0	0	0.0145608	0	0	0	0	0	0	0.000314918	0	0.00314293	0	0	0
338	Bacteria	Verrucomicrobiota	Verrucomicrobiae	Verrucomicrobiales	Akkermansiaceae	Akkermansia	0.00223823	0	0.000335981	0	0.00103882	0	0.000814332	0	0	0	0	0	0.00845052	0	0.0540989	0.0231206	0.00924156	0	0.0506535	0	0	0	0	0	0	0.075769	0.00717283	0	0	0	0.000378203	0.0013356	0	0.0194376	0.012589	0	0	0.0183252	0	0.0591442	0	0.00791169	0
[truncated: 57 more columns]

## Sheet: SILVA138v_Species
Supplementary Table S5. Relative bacterial frequency data for 100 individuals measured by 16S metagenome sequencing
	Domain	Phylum	Class	Order	Family	Genus	Species	Candidate 1	Candidate 2	Candidate 3	Candidate 4	Candidate 5	Candidate 6	Candidate 7	Candidate 8	Candidate 9	Candidate 10	Candidate 11	Candidate 12	Candidate 13	Candidate 14	Candidate 15	Candidate 16	Candidate 17	Candidate 18	Candidate 19	Candidate 20	Candidate 21	Candidate 22	Candidate 23	Candidate 24	Candidate 25	Candidate 26	Candidate 27	Candidate 28	Candidate 29	Candidate 30	Candidate 31	Candidate 32	Candidate 33	Candidate 34	Candidate 35	Candidate 36	Candidate 37	Candidate 38	Candidate 39	Candidate 40	Candidate 41	Candidate 42
0	Bacteria	unidentified	unidentified	unidentified	unidentified	unidentified	unidentified	0	0	0	0	0	0	0.000220548	0	1.32564e-05	0	0	0	6.65395e-05	0	0	0	0	0	0	0	0	0	0	0	0	0	0	0	0	0.00106815	0	0	4.58526e-05	2.27674e-05	0	0	0.00028356	0	0	4.3957e-05	0.000520717	0
1	Bacteria	Actinobacteriota	Actinobacteria	Actinomycetales	Actinomycetaceae	Actinomyces	Actinomyces_graevenitzii	0	0	0	0	0	0	0	0	0	0	0	0	0	0	0	0	0	0	0	0	0	0	0	0	0	0	0	0	0	0	0	0	0	0	0	0	0	0	0	0	0	0
2	Bacteria	Actinobacteriota	Actinobacteria	Actinomycetales	Actinomycetaceae	Actinomyces	Actinomyces_lingnae	0	0	0	0	0	0	0	0	0	0	0	0	0	0	0	0	0	0	0	0	0	0	0	0	0	0	0	0	0	0	0	0	0	0	0	0	0	0	0	0	0	0.000102527
3	Bacteria	Actinobacteriota	Actinobacteria	Actinomycetales	Actinomycetaceae	Actinomyces	Schaalia_odontolytica	0	0	0	0	6.9255e-05	0	5.08958e-05	0	0	0	0	0	0	0	0	0	0	0	0	0	0	0	0	0	0	0	0	0	0	0	0	0	0	0	0	0	0	0	0	0	0	0
4	Bacteria	Actinobacteriota	Actinobacteria	Actinomycetales	Actinomycetaceae	Actinomyces	Schaalia_turicensis	0	0	0	0	0	0	0	0	0	0	0	0	0	0	0	0	0	0	0	0	0	0	0	0	0	0	0	0	0	0	0	0	0	0	0	0	0	0	0	0	0	0
5	Bacteria	Actinobacteriota	Actinobacteria	Bifidobacteriales	Bifidobacteriaceae	Bifidobacterium	unidentified	0.00280796	0.00351254	0.00134392	0	0.00184218	0.0262012	0	0.00822775	0.000861663	0.00379744	0.00096177	0	0.0147052	0	0.000756879	0.00549414	0	0	0.00243472	0.000401267	0	0	0	0.00208796	0.00163503	0.00394312	0.00792145	0	0.00181034	0	0	0.00664463	0.00372935	0.0109511	0	0	0	0.00106472	0	0.000747269	0	0.000632252
6	Bacteria	Actinobacteriota	Actinobacteria	Bifidobacteriales	Bifidobacteriaceae	Bifidobacterium	Bifidobacterium_adolescentis	0.0016278	0.00855343	0	0	0.00275635	0	0.000746471	0	0.0189367	0	0.0096386	0	0.0373287	0.00429016	0	0.00405742	0.0016424	0	0	0	0	0	0.00339588	0	0.00743584	0.045711	0.00175839	0	0.0056046	0	0.000378203	0.00734582	0	0	0.00184576	0.00966618	0.00191948	0.00532362	0.00319115	0.00364843	0	0.00280241
7	Bacteria	Actinobacteriota	Actinobacteria	Bifidobacteriales	Bifidobacteriaceae	Bifidobacterium	Bifidobacterium_angulatum	0	0	0	0	0	0	0	0	0	0	0	0	0	0	0	0	0	0	0	0	0	0	0	0	0	0	0	0	0	0	0	0	0	0	0	0	0	0.00109472	0	0	0	0
8	Bacteria	Actinobacteriota	Actinobacteria	Bifidobacteriales	Bifidobacteriaceae	Bifidobacterium	Bifidobacterium_animalis	0	0	0	0	0	0	0	0	0	0	0	0	0.000443597	0	0	0	0	0	0	0	0	0	0	0	0	0	0	0	0	0	0	0	0	0	0	0	0	0	0	0	0	0
9	Bacteria	Actinobacteriota	Actinobacteria	Bifidobacteriales	Bifidobacteriaceae	Bifidobacterium	Bifidobacterium_bifidum	0	0.000429012	0.000241906	0.000452527	0	0	0.000576819	0	0	0	0	0	0.000266158	0	0	0.000478908	0	0	0	0	0	0	0	0	0.00206156	0	0	0	0	0	0	0	0	0.000700097	0	0.000369114	9.452e-05	0.000329914	0	0	0	0.00266571
10	Bacteria	Actinobacteriota	Actinobacteria	Bifidobacteriales	Bifidobacteriaceae	Bifidobacterium	Bifidobacterium_breve	0	0	0	0	0	0	0	0	0	0	0	0	0	0	0	0	0	0.00109573	0	0	0	0	0	0	0	0	0	0	0	0	0	0	0	0	0	0	0	0	0	0	0	0
11	Bacteria	Actinobacteriota	Actinobacteria	Bifidobacteriales	Bifidobacteriaceae	Bifidobacterium	Bifidobacterium_callitrichidarum	0	0	0	0	0	0	0	0	0	0	0	0	0	0	0	0	0	0	0	0	0	0	0	0	0	0	0	0	0	0	0	0	0	0	0	0	0	0	0	0	0	0
12	Bacteria	Actinobacteriota	Actinobacteria	Bifidobacteriales	Bifidobacteriaceae	Bifidobacterium	Bifidobacterium_dentium	0	0	0	0	0	0	0	0	0	0	0	0	0	0	0	0	0	0	0	0	0	0	0	0	0	0	0	0	0	0	0	0	0	0	0	0	0	0	0	0	0	0.00032467
13	Bacteria	Actinobacteriota	Actinobacteria	Bifidobacteriales	Bifidobacteriaceae	Bifidobacterium	Bifidobacterium_longum	0.000406951	0.00581847	0	0.00111553	0.00137125	0.0287168	0.000118757	0.00808558	0.000855035	0	0.00185036	0.000327681	0.0853924	0	0	0.000691756	0.000441241	9.46931e-05	0	0	0	0	0.000907521	0	0.00376768	0.000584166	0.00107941	0	0.00147555	0.000741774	0.000283652	0	0.00148257	0.000785474	0.000402281	0.000184557	0.00119241	0.00872773	0	0.00127475	0	0.00165752
14	Bacteria	Actinobacteriota	Actinobacteria	Corynebacteriales	Corynebacteriaceae	Corynebacterium	Corynebacterium_argentoratense	0	0	0	0	0	0	0	0	0	0	0	0	0	0	0	0	0	0	0	0	0	0	0	0	0	0	0	0	0	0	0	0	0	0	0	0	0	0	0	0	0	0
15	Bacteria	Actinobacteriota	Actinobacteria	Micrococcales	Micrococcaceae	Rothia	unidentified	0	0.000107253	0	9.47149e-05	0	0	0	0	0.000225358	0.000755173	0	0	0	0	0	0.000226151	0	0	0	0	0	0.000238831	0	0	0	0	0	0	0.000384386	0	0.000189101	0	0	0.000125221	0	0	0	5.99844e-05	0	0	0.00104143	0
16	Bacteria	Actinobacteriota	Actinobacteria	Micrococcales	Micrococcaceae	Rothia	Rothia_mucilaginosa	0	0	0	0	0	0	0	0	0	0	0	0	0	0	0	0	0	0	0	0.000211193	0	0	0	0	0	0	0	0	0	0	0	0	0	0	0	0	0	0	0	0	0	0
17	Bacteria	Actinobacteriota	Coriobacteriia	Coriobacteriales	Atopobiaceae	Atopobium	uncultured_bacterium	0	0	0	0	0	0	0	0	0	0	0	0	0	0	0	0	0	0	0	0	0	0	0	0	0	0	0	0	0	0	0	0	0	0	0	0	0	0	0	0	0	0
18	Bacteria	Actinobacteriota	Coriobacteriia	Coriobacteriales	Atopobiaceae	Libanicoccus	uncultured_bacterium	0	0	0	0	0	0	0	0	0	0	0	0	0	0	0	0	0	0	0	0	0	0	0	0	0	0	0	0	0	0	0	0	0	0	0	0	0	0	0	0	0	0
19	Bacteria	Actinobacteriota	Coriobacteriia	Coriobacteriales	Atopobiaceae	Olsenella	unidentified	0	0	0	0	0	0	0.000101792	0	0	0	0	0	0	0	0.000162188	0	0	0	0	0	0	0	0	0	0	0	0	0	0	0	0	0	0	0	0	0	0	0	0	0	0	0
20	Bacteria	Actinobacteriota	Coriobacteriia	Coriobacteriales	Atopobiaceae	Olsenella	Olsenella_sp.	0	0	0	0	0	0	0	0	0	0	0	0	0	0	0	0	0	0	0	0	0	0	0	0	0	6.63825e-05	0	0	0	0	0	0	0	0	0	0	0	0	0	0	0.000272757	0
21	Bacteria	Actinobacteriota	Coriobacteriia	Coriobacteriales	Atopobiaceae	Olsenella	metagenome	0	0	0	0	0	0	0	0	0	0	0	0	0	0	0	0	0	0	0	0	0	0	0	0	0	0	0	0	0	0	0	0	0	0	0	0	0	0	0	0	0	0
22	Bacteria	Actinobacteriota	Coriobacteriia	Coriobacteriales	Atopobiaceae	uncultured	uncultured_bacterium	0	0	0	0	0	0	0	0	0	0	0	0	0	0	0	0	0	0	0	0	0	0	0	0	0	9.29356e-05	0	0	0	0	0	0	0	0	0	0	0	0	0	0	0	0
23	Bacteria	Actinobacteriota	Coriobacteriia	Coriobacteriales	Coriobacteriaceae	Collinsella	unidentified	0.000732511	0.0066765	0.00170678	0	0.00102497	0	0.00035627	0.00557994	0.00148471	0	0.00958633	0	0.0341126	0.0013669	0	0.00339227	0.000318674	0	7.46276e-05	0.00365364	0.000725225	0.000223904	0.000863608	0	0.00511836	0.00244288	0	0	0.00187233	0.000385722	0.00236377	0.000567632	0.00198695	0	0	0.00062288	0.00106153	0.00310419	0	0.00298908	0.0012646	0.00258027
24	Bacteria	Actinobacteriota	Coriobacteriia	Coriobacteriales	Coriobacteriaceae	Collinsella	Collinsella_sp.	0	0	0	0	0	0	0	0	0	0	0	0	0	0	0	0	0	0	0	0	0	0	0	0	0	0	0	0	0	0	0	0	0	0	0	0	0	0	0	0	0	0
25	Bacteria	Actinobacteriota	Coriobacteriia	Coriobacteriales	Coriobacteriaceae	Collinsella	Collinsella_tanakaei	0	0	0	0	0	0	0	0	0	0	0	0	0	0	0	0	0	0	0	0	0	0	0	0	0	0	0	0	0	0	0	0	0	0	0	0.000184557	0	0	0	0	0	0
26	Bacteria	Actinobacteriota	Coriobacteriia	Coriobacteriales	Coriobacteriaceae	Collinsella	uncultured_actinobacterium	0	0	0	0	0	0	0	0	0	0	0	0	4.43597e-05	0	0	0	0	0	0	0	0	0	0	0	0	0	0	0	0	0	0	0	0	0	0	0	0	0	0	0	0	0
27	Bacteria	Actinobacteriota	Coriobacteriia	Coriobacteriales	Coriobacteriaceae	Collinsella	uncultured_bacterium	0	0	0	0	0	0	0	0	0	0	0	0	0	0	0	0	0	0	0	0	0	0	0	0	0	0	0	0	0	0	0	0	0	0	0	0	0	0	0	0	0	0
28	Bacteria	Actinobacteriota	Coriobacteriia	Coriobacteriales	Coriobacteriales_Incertae_Sedis	unidentified	unidentified	0	0	0	0	0	0	0	0	0	0	0	0	2.21798e-05	0	0	0	0	0	0	0	0	0	0	0	0	0	0	0	0	0	0	0	0	0	0	0	0	0	0	0	0	0
29	Bacteria	Actinobacteriota	Coriobacteriia	Coriobacteriales	Coriobacteriales_Incertae_Sedis	Raoultibacter	unidentified	0	0	0	0.000105239	0	0	0	3.5541e-05	0	0	0	0	6.65395e-05	0	0	0	0	0	0	0	0	0	0	0	0	0	0	0	0	0	0	0	0	0	0	0	0	0	0	0	0	0
30	Bacteria	Actinobacteriota	Coriobacteriia	Coriobacteriales	Coriobacteriales_Incertae_Sedis	Raoultibacter	Raoultibacter_timonensis	0	0	0	0	0	0	0	0	0	0	0	0	0	0	0	0	0	0	0	0	0	0	0	0	0	0	0	0	0	0	0	0	0	0	0	0	0	0	0	0	0	0
31	Bacteria	Actinobacteriota	Coriobacteriia	Coriobacteriales	Coriobacteriales_Incertae_Sedis	uncultured	gut_metagenome	0	0	0	0	0	0	0	0	0	0	0	0	0.000465777	0	0.000342398	0	0	0	0	0	0	0	0	0	0.000838843	0	0.000121868	0	0	0	0.000157585	0	0	0	0	0	0	0	0	0.000175828	0	0
32	Bacteria	Actinobacteriota	Coriobacteriia	Coriobacteriales	Coriobacteriales_Incertae_Sedis	uncultured	uncultured_bacterium	0	0	0	0	2.7702e-05	0	0	0	0	0	0	0	0.00589984	0	0.00131553	0	0	0	0	0	0	0	0	0	0	0	0	0	0	0	0	0	0	0	0	0	0	0	0.000418054	0	0	0
33	Bacteria	Actinobacteriota	Coriobacteriia	Coriobacteriales	Coriobacteriales_Incertae_Sedis	uncultured	uncultured_organism	0	0	0	0	0	0	0	0	0	0	0.000250896	0	0	0	0	0.000891301	0	0	0	0	0	0	0	0	0	0	0	0	0	0	0	0.00010017	0	0	0	0	0	0	0	0	0	0
34	Bacteria	Actinobacteriota	Coriobacteriia	Coriobacteriales	Eggerthellaceae	unidentified	unidentified	0	0	0	0	0	0	0	0	0	0	0	0	0	0	0	0	0	0	0	0	0	0	0	0	0	0	0	0	0	0	6.30338e-05	0	0	0	0	0	0	0	0	0	0	0
35	Bacteria	Actinobacteriota	Coriobacteriia	Coriobacteriales	Eggerthellaceae	Adlercreutzia	unidentified	0	0	0	0	0	0	0	0	0	0	0	0	0	0	0	0	0	0	0	0	0	0	0	0	0	0	0	0	0	0	0	0	0	0	0	0	0	0	0	0	0	0
36	Bacteria	Actinobacteriota	Coriobacteriia	Coriobacteriales	Eggerthellaceae	Adlercreutzia	Adlercreutzia_equolifaciens	0	0	0	0	0	0	0	0	0	0.000151035	0.000303167	0	0.000687575	0	0	0.000119727	0	0	0	0	0	0	0	0	0	0	0	0	0	0	0	0	0	0	0	0	0	0	0.000153287	0	0	0
37	Bacteria	Actinobacteriota	Coriobacteriia	Coriobacteriales	Eggerthellaceae	Adlercreutzia	uncultured_bacterium	0	0.000214506	0	0	0.00013851	0	0	0	0	0	0.000407707	0	0	0	0.00239679	0	0	0	0	0.000464625	0	0	5.85497e-05	0	0	0.000650549	0	0	0	0	0.000504271	0	0.000611368	0	0	0	0	0	0	0	0	0
38	Bacteria	Actinobacteriota	Coriobacteriia	Coriobacteriales	Eggerthellaceae	Asaccharobacter	Adlercreutzia_equolifaciens	0	0	0	0	0	0	0	0	0	0	0	0	0	0	0	0	0	0	0	0	0	0	0	0	0	0	0	0	0	0	0	0	0	0	0	0	0	0	0	0	0	0
39	Bacteria	Actinobacteriota	Coriobacteriia	Coriobacteriales	Eggerthellaceae	CHKCI002	uncultured_bacterium	0	0	0	0	0	0	0	0	0	0	0	0	0	0	0	0	0	0	0	0	0	0	0	0	0	0	0	0	0	0	0	0	0	0	0	0	0	0	0	0	0	0
40	Bacteria	Actinobacteriota	Coriobacteriia	Coriobacteriales	Eggerthellaceae	Eggerthella	unidentified	0	0.000214506	0	0.000484098	0	0.00107405	0	0	0	0	0	0	0.000243978	0	0	0	0	0	0	0.000147835	0	0	0	0	0.000383877	5.3106e-05	0	0	0	0	0.000126068	0	0	0.000113837	0	0	0	0.000239938	0.000348379	0	0	0.000119615
41	Bacteria	Actinobacteriota	Coriobacteriia	Coriobacteriales	Eggerthellaceae	Enterorhabdus	uncultured_bacterium	0	0	0	0	0	0	0	0	0	0	0	0	8.87193e-05	0	0	0	0	0	0	0	0	0	0	0	0	0.000119489	0	0	0	0	0.000472754	0	0	0	0	0	0	0	0	0	0	0
42	Bacteria	Actinobacteriota	Coriobacteriia	Coriobacteriales	Eggerthellaceae	Gordonibacter	unidentified	0	0	0	0	0	0	0	0	5.30254e-05	0	0	0	0	0	0	0	0	0	0	0	0	0	0	0	0	0	0	0	0	0	0	0	0	0	0	0	0	0	0	0	0	0
43	Bacteria	Actinobacteriota	Coriobacteriia	Coriobacteriales	Eggerthellaceae	Gordonibacter	Gordonibacter_pamelaeae	0	0	0	0	0	0	0	0	0	0	0	0	4.43597e-05	0	0	0	0	0	0	0	0	0	0	0	0	0	0	0	0	0	0	0	0	3.98429e-05	0	0	0	0	6.96757e-05	0	0	0
44	Bacteria	Actinobacteriota	Coriobacteriia	Coriobacteriales	Eggerthellaceae	Senegalimassilia	unidentified	0	0	0	0	0	0	0	0	0	0	0	0	0	0	0	0	0	0	0	0	0	0	0	0	0	0	0	0	0	0	0	0	0	0	0	0	0	0	0	0	0	0
45	Bacteria	Actinobacteriota	Coriobacteriia	Coriobacteriales	Eggerthellaceae	Senegalimassilia	uncultured_bacterium	0	0	0.000241906	0	0.000207765	0	5.08958e-05	0.000621968	0.00029164	0	0.00221625	0	0	0	0	0	0	0	0	0.00166843	0	0.000134342	0	0	0	0	0.000121868	0	0	0	0.000850957	0	0	0	0	0	0	0	0	0.000131871	0.000198368	0.000119615
46	Bacteria	Actinobacteriota	Coriobacteriia	Coriobacteriales	Eggerthellaceae	Slackia	unidentified	0	0	0	0	0	0	0	0	0	0	0	0	0	0	0	0	0	0	0	0	0	0	0	0	0	0	0	0	0	0	0	0	0	0	0	0	0	0	0	0	0	0
47	Bacteria	Actinobacteriota	Coriobacteriia	Coriobacteriales	Eggerthellaceae	Slackia	Slackia_isoflavoniconvertens	0	0	0.000120953	0	0	0	0	0	0	0	0	0	0	0	0	0	0	0	0	0	0	0	0	0	0	0	0	0	0	0	0	0	0	0	0	0	0	0	0	0	0	0.0022556
48	Bacteria	Actinobacteriota	Coriobacteriia	Coriobacteriales	Eggerthellaceae	Slackia	Slackia_piriformis	0	0	0	0	0	0	0	0	0	0	0	0	0	0	0	0	0	0	0	0	0	0	0	0	0	0	0	0	0	0	0	0	0	0	0	0	0	0	0	0	0	0
49	Bacteria	Actinobacteriota	Coriobacteriia	Coriobacteriales	Eggerthellaceae	uncultured	metagenome	0	0	0	0	0	0	0	0	0	0	0	0	0	0	0	0	0	0	0	0	0	0	0	0	0	0	0	0	0	0	0	0	0	0	0	0	0	0	0	0	0	0
50	Bacteria	Actinobacteriota	Coriobacteriia	Coriobacteriales	Eggerthellaceae	uncultured	uncultured_bacterium	0.00183128	0	0	0	0.00027702	0	0	0.0013861	0.000417575	0	0	0	0	0	0	0	0	0	0	0.0013094	0	0.000119415	7.31872e-05	0	0	0.000278807	0	0	0	0	0	0	0.00255246	0	0	0	0	0	0	0	0	0.000546812
51	Bacteria	Actinobacteriota	Coriobacteriia	Coriobacteriales	uncultured	uncultured	uncultured_Coriobacteriaceae	0	0	0	0	0	0	0	0	0	0	0	0	4.43597e-05	0	0	0	0	0	0	0	0	0	0	0	0	0	0	0	0	0	0	0	0	0	0	0	0	0	0	0	0	0
52	Bacteria	Actinobacteriota	Coriobacteriia	Coriobacteriales	uncultured	uncultured	uncultured_bacterium	0	0	0	0	5.5404e-05	0	0	8.88526e-05	0	0	0	0	0.00113117	0	0.000144168	0	0	0	0	0	0	0	0	0	0	0	0	0	0	0	0	0	0	0	0	0.000115348	0	0	0	0	0	0
53	Bacteria	Bacteroidota	Bacteroidia	Bacteroidales	unidentified	unidentified	unidentified	0	0	0	0	0	0	0	0	0	0	0	0	2.21798e-05	0	0	0	0	0	0	0	0	0	0	0	0	0	0	0	0.00257911	0	0	0	0	0	0	0	0	0	0	0	0	0
54	Bacteria	Bacteroidota	Bacteroidia	Bacteroidales	Bacteroidaceae	Bacteroides	unidentified	0.000284866	0.012629	0.00385706	0.00376755	0.000526338	0.0233748	0.00335912	0.00286105	0.00414261	0.0205407	0.0244206	0	0.00232888	0.00564352	0.0132814	0.00477578	0.00330931	0.00558689	0.0482467	0.0054699	0.000725225	0.00183601	0.00141983	0	0.0213123	0.0067843	0.0142064	0.00658256	0.000892769	0.0440614	0.00289956	0.00427393	0.0256622	0	0.0109089	0.0341431	0	0.00322416	0	0.00186817	0.0012398	0.0012645
55	Bacteria	Bacteroidota	Bacteroidia	Bacteroidales	Bacteroidaceae	Bacteroides	Bacteroidaceae_bacterium	0	0	0	0	0	0	0.0357967	0	0	0	0	0	0	0	0	0	0	0	0	0	0	0.0119863	0	0	0	0	0	0	0	0	0	0	0	0	0	0	0	0.000134965	0	0	0	0
56	Bacteria	Bacteroidota	Bacteroidia	Bacteroidales	Bacteroidaceae	Bacteroides	Bacteroides_acidifaciens	0	0	0	0	0	0	0	0	0	0	0	0	0	0	0	0	0	0	0	0	0	0	0	0	0	0	0	0	0	0	0	0	0	0	0	0	0	0	0	0	0	0
57	Bacteria	Bacteroidota	Bacteroidia	Bacteroidales	Bacteroidaceae	Bacteroides	Bacteroides_barnesiae	0	0	0	0	0	0	0	0	0	0	0	0	0	0	0	0	0	0	0	0	0	0	0	0	0	0	0	0	0	0	0	0	0	0	0	0	0	0	0	0.0923976	0	0
58	Bacteria	Bacteroidota	Bacteroidia	Bacteroidales	Bacteroidaceae	Bacteroides	Bacteroides_caccae	0.0112318	0.0394691	0.0192853	0.0123866	0.00171752	0	0	0.000799673	0.00733077	0.00500572	0.0081855	0	0.0393692	0.00029774	0.0229226	0	0.000784429	0	0.00237875	0.0081943	0.00452199	0	0	0	0.00403782	0.00231011	0.00186285	0.000767965	0.00121516	0	0	0	0.00250661	0	0	0.00295291	0	0.00130466	0	0.00301106	0	0.00533142
59	Bacteria	Bacteroidota	Bacteroidia	Bacteroidales	Bacteroidaceae	Bacteroides	Bacteroides_caecigallinarum	0	0	0	0.000757719	0	0	0	0	0	0	0	0	0	0	0	0	0	0	0	0	0	0.00946368	0	0	0	0	0.000156688	0	0	0	0.0113146	0	0	0	0	0	0	0.000209945	0	0	0	0
60	Bacteria	Bacteroidota	Bacteroidia	Bacteroidales	Bacteroidaceae	Bacteroides	Bacteroides_cellulosilyticus	0	0.01464	0.0285718	0	0.000263169	0	0.000254479	0.00908073	0.00351956	0	0.00895909	0	0.000243978	0.00452023	0.0109748	0.00770244	0	0	0.00607282	0.00352693	0	0.000268685	0.00112708	0	0	0	0.0587406	0	0	0.00519242	0.00491664	0.0191325	0.0005808	0	0.000236636	0.004637	0	0	0	0.00246159	0.000272757	0
61	Bacteria	Bacteroidota	Bacteroidia	Bacteroidales	Bacteroidaceae	Bacteroides	Bacteroides_clarus	0	0	0	0	0	0	0	0.000959608	0.0052694	0	0	0	0	0	0	0.0048689	0.00105408	0	0.00118471	0	0	7.46347e-05	0	0	0	0	0	0.00082282	0	0	0.000977024	0	0.000458526	0	0	0	0	0	0	0	0	0
62	Bacteria	Bacteroidota	Bacteroidia	Bacteroidales	Bacteroidaceae	Bacteroides	Bacteroides_coprocola	0	0	0.00779476	0.0581234	0	0	0	0.11565	0.0534298	0.000604138	0	0	0.00616599	0	0	0	0	0	0	0.000443506	0.013438	0	0.000234199	0	0	0	0.0227894	0	0.221518	0.0698454	0.0201708	0	0.00950678	0.152428	0	0	0	0.0312069	0.000404119	0.000527484	0	0.105962
63	Bacteria	Bacteroidota	Bacteroidia	Bacteroidales	Bacteroidaceae	Bacteroides	Bacteroides_coprophilus	0.0192895	0	0	0	0.0230342	0	0.0333028	0	0.02583	0	4.18161e-05	0	0	0	0	0	0.0260087	0	0.0170244	0	0.0181733	0.000134342	0.0136714	0	0.0136632	0	0	0.0283598	0	0.00246269	0.00920294	0	0.0278325	0	0	0.00729001	0	0	0	0	0	0.0429589
64	Bacteria	Bacteroidota	Bacteroidia	Bacteroidales	Bacteroidaceae	Bacteroides	Bacteroides_cutis	0	0	0	0	0	0	0	0	0	0	0	0	0	0	0	0	0	0	0	0	0	0	0	0	0	0	0	0	0	0	0	0	0	0	0	0	0	0	0	0	0	0
65	Bacteria	Bacteroidota	Bacteroidia	Bacteroidales	Bacteroidaceae	Bacteroides	Bacteroides_dorei	0.0099296	0	0.0206695	0	0.000512487	0.0507631	0	0	0	0	0.00564517	0	0.0546068	0.00594126	0	0.0316478	0	0	0	0.0126505	0	0	0	0	0	0	0	0.0219419	0	0	0	0	0	0	0	0.0108658	0	0	0	0	0	0
66	Bacteria	Bacteroidota	Bacteroidia	Bacteroidales	Bacteroidaceae	Bacteroides	Bacteroides_eggerthii	0	0	0	0	0	0	0	0	0	0	0	0	0	0	0.0282208	0	0	0	0.00115673	0.000168955	0	0	0	0	0	0	0.0420098	0	0	0.0119277	0	0	0.00794779	0	0	0	0	0	0	0.00698916	0.000198368	0
67	Bacteria	Bacteroidota	Bacteroidia	Bacteroidales	Bacteroidaceae	Bacteroides	Bacteroides_faecis	0	0	0	0	0	0	0	0	0	0	0	0	0	0	0	0	0	0	0	0	0	0	0.00062941	0	0	0	0	0	0.000446384	0	0	0	0	0	0	0	0	0	0	0	0	0
68	Bacteria	Bacteroidota	Bacteroidia	Bacteroidales	Bacteroidaceae	Bacteroides	Bacteroides_finegoldii	0	0	0	0.00132601	0.00235467	0	0	0.00380289	0	0	0	0	0.000110899	0	0.00407273	0	0	0	0	0.000802534	0	0	0	0	0	0.00594788	0	0	0.00169874	0	0.00170191	0	0	0.0126188	0	0.000484463	0	0	0	0.00127475	0	0
69	Bacteria	Bacteroidota	Bacteroidia	Bacteroidales	Bacteroidaceae	Bacteroides	Bacteroides_fragilis	0	0.00488001	0	0	0	0	0.000254479	0.00133279	0	0.000560986	0	0	0.00204054	0.00439843	0	0.00787538	0	0.0219282	0	0.00107709	0	0	0.000161012	0.00255944	0	0.00192509	0.000574523	0	0	0	0	0	0	0	0.00111219	0.00062288	0.000181769	0	0.0193699	0	0	0
70	Bacteria	Bacteroidota	Bacteroidia	Bacteroidales	Bacteroidaceae	Bacteroides	Bacteroides_intestinalis	0	0.00718595	0	0.00276778	0	0	0	0	0.000848407	0	0	0	0.00450251	0	0.0188319	0	0	0	0.00041978	0	0	0	0	0	0	0	0	0	0	0.000919799	0	0	0	0	0	0	0	0	0	0	0	0
71	Bacteria	Bacteroidota	Bacteroidia	Bacteroidales	Bacteroidaceae	Bacteroides	Bacteroides_kribbi	0	0	0	0	0	0	0	0	0	0	0	0	0	0	0	0	0	0	0	0	0	0	0	0	0	0	0	0	0	0	0	0	0	0	0	0	0	0	0	0	0	0
72	Bacteria	Bacteroidota	Bacteroidia	Bacteroidales	Bacteroidaceae	Bacteroides	Bacteroides_massiliensis	0	0	0	0	0	0	0	0	0	0	0.00976405	0	0	0	0.032672	0	0	0	0	0	0	0	0	0	0	0	0.0170093	0	0.0145695	0	0	0.0631741	0	0	0	0	0	0	0	0	0.000719086	0
73	Bacteria	Bacteroidota	Bacteroidia	Bacteroidales	Bacteroidaceae	Bacteroides	Bacteroides_nordii	0.000854597	0.00235957	0	0.000242049	5.5404e-05	0	0.000135722	0.00175928	0.000225358	0.00176926	0.000710873	0	0.000221798	0.00127216	0.00495576	9.3121e-05	0	0	0	0	0	0	0.000204924	0	0.000270136	0	0.000121868	0	0	0	0	0	0.0002904	0	0.000118318	0.000276836	0	0	0	0	0	0.000375933
74	Bacteria	Bacteroidota	Bacteroidia	Bacteroidales	Bacteroidaceae	Bacteroides	Bacteroides_ovatus	0.00561592	0	0.00194869	0.00696681	0.00223001	0.00356133	0.00293499	0.00143941	0.00564058	0.00983882	0.00435933	0	0.0021958	0.000338341	0	0.00762262	0	0.138725	0.0109889	0	0.00302888	0.000432881	0.00187359	0.00471476	0.00648326	0.0100238	0	0	0	0.00314512	0	0.00444088	0.00421844	0	0	0.013911	0.00252296	0.00185952	0.31028	0.00107695	0	0.00319543
75	Bacteria	Bacteroidota	Bacteroidia	Bacteroidales	Bacteroidaceae	Bacteroides	Bacteroides_plebeius	0.0149758	0.270707	0.061041	0.109848	0.131294	0	0.04981	0.10083	0.145031	0.00094936	0	0.0167936	0.0397463	9.47354e-05	0.000306356	0.120153	0.0399814	0	0.120999	0.0270961	0.0576767	0.0376607	0.0112415	0.0742911	0.0449705	0.0251059	0.0719894	0.0244103	0.270769	0	0.0620568	0	0.0694973	0.000210598	0.0861118	0.0890027	0.126388	0.0767201	0.000473795	0.0130772	0.00280195	0.0647118
76	Bacteria	Bacteroidota	Bacteroidia	Bacteroidales	Bacteroidaceae	Bacteroides	Bacteroides_rodentium	0	0	0	0	0	0	0	0	0	0	0	0	0	0	0	0	0	0	0	0	0	0	0	0	0	0	0	0	0	0	0	0	0	0	0	0	0	0	0	0	0	0
77	Bacteria	Bacteroidota	Bacteroidia	Bacteroidales	Bacteroidaceae	Bacteroides	Bacteroides_salyersiae	0	0	0	0	0.00195299	0	0	0	0.000841779	0.00673183	0	0	0.000465777	0	0	0.00335236	0	0	0.00205226	0.00179514	0	0	0	0	0.00109476	0	0.00100977	0	0.000409186	0	0.000220618	0.0030385	0	0	0.00414113	0	0	0	0	0	0.000272757	0.00143538
78	Bacteria	Bacteroidota	Bacteroidia	Bacteroidales	Bacteroidaceae	Bacteroides	Bacteroides_sartorii	0	0	0	0	0	0	0	0	0	0	0	0	0	0	0	0	0	0	0	0	0	0	0	0	0	0	0	0	0	0	0	0	0	0	0	0	0	0	0	0	0	0
79	Bacteria	Bacteroidota	Bacteroidia	Bacteroidales	Bacteroidaceae	Bacteroides	Bacteroides_stercorirosoris	0	0	0	0	0	0	0	0	0	0	0	0	0	0	0	0	0.00014708	0	0	0	0	0	0	0	0	0	0	0	0	0	0	0	0	0	0	0	0	0	0	0	0	0
80	Bacteria	Bacteroidota	Bacteroidia	Bacteroidales	Bacteroidaceae	Bacteroides	Bacteroides_stercoris	0.0049648	0	0.003427	0	0.000789506	0.140531	0.00351181	0.00403391	0	0	0	0	0.000377057	0	0.0299328	0	0	0	0.0197763	0.0121436	0	0	0.00100998	0	0	0	0.0263062	0	0.0148175	0	0.00179646	0.0695182	0.0586608	0	0.00847157	0.0062288	0	0.00679323	0	0	0.00104143	0.0169854
81	Bacteria	Bacteroidota	Bacteroidia	Bacteroidales	Bacteroidaceae	Bacteroides	Bacteroides_thetaiotaomicron	0.00968543	0.0489074	0.00826513	0.00974511	0.00166212	0.00568118	0.00544585	0.00232794	0.00255185	0.0143267	0.026825	0.0012288	0.00177439	0.00205711	0.00551441	0.00130369	0.00112762	0.0432883	0.00851687	0.00192186	0.00204769	0	0.000585497	0.00356974	0.00339802	0.00727553	0.00828705	0.00104224	0.00029759	0.0253983	0.00479057	0.00410698	0.00437128	0.00406398	0.0169668	0.00650564	0.00105426	0.00139464	0.0335558	0.00292314	0.00143817	0.000939834
82	Bacteria	Bacteroidota	Bacteroidia	Bacteroidales	Bacteroidaceae	Bacteroides	Bacteroides_uniformis	0.0258821	0.0293069	0.0177398	0.01828	0.0219954	0.0457038	0.0157777	0.0278464	0.028468	0.0508339	0.0193399	0.00581633	0.0641441	0.0261064	0.0236615	0.0490615	0.00509879	0.155851	0.0770156	0.0784583	0.00179173	0.00101503	0.00269329	0.00794773	0.0473591	0.18457	0.0209265	0.00373012	0.00347188	0.0376228	0.0164518	0.0475475	0.0595014	0.0177187	0.00172744	0.0194477	0.00634011	0.00917761	0	0.0125717	0.00265318	0.0119444
83	Bacteria	Bacteroidota	Bacteroidia	Bacteroidales	Bacteroidaceae	Bacteroides	Bacteroides_vulgatus	0.0236845	0.000294946	0.00602078	0.0408853	0.0230203	0.210514	0.022971	0.0743518	0.0233113	0.175071	0.137815	0.050299	0.0147052	0.114779	0.106612	0.0413989	0.0221601	0.165294	0.109404	0.137592	0.0082761	0.00394071	0.0150766	0.00983364	0.0607521	0.0643645	0.0631975	0.00257817	0.0221332	0.0523396	0.0219988	0.059234	0.0858973	0.121344	0.0143638	0.0391492	0.00852861	0.0318667	0.000557406	0.042924	0.00285155	0.0197194
84	Bacteria	Bacteroidota	Bacteroidia	Bacteroidales	Bacteroidaceae	Bacteroides	Bacteroides_xylanisolvens	0	0	0.00575199	0	0.00069255	0	0	0	0	0	0.00175628	0.00180224	0	0.00530518	0	0	0.00250037	0	0	0	0	0	0.00131737	0	0.00565863	0	0	0	0	0	0	0	0.000473811	0	0.00170378	0	0	0	0.00777581	0	0	0
85	Bacteria	Bacteroidota	Bacteroidia	Bacteroidales	Bacteroidaceae	Bacteroides	bacterium_NLAE-zl-H13	0	0	0	0	0	0	0	0	0	0	0	0	0	0	0	0	0	0	0	0	0	0	0	0	0	0	0	0	0	0	0	0	0	0	0	0	0	0	0	0	0	0
86	Bacteria	Bacteroidota	Bacteroidia	Bacteroidales	Bacteroidaceae	Bacteroides	bacterium_NLAE-zl-H46	0	0	0	0	0	0	0	0	0	0	0	0	0	0	0	0	0	0	0	0	0	0	0	0	0	0	0	0	0	0	0	0	0	0	0	0	0	0	0	0	0	0
87	Bacteria	Bacteroidota	Bacteroidia	Bacteroidales	Bacteroidaceae	Bacteroides	uncultured_bacterium	0	0	0	0	0	0	0	0	3.31409e-05	0	0	0	0	0	7.20838e-05	0	0	0	0.000335824	0	0	0	0	0	0	0	0	0	0.00153755	0	0	0	0	0	0	0	0	0	0	0.0185499	0	0
88	Bacteria	Bacteroidota	Bacteroidia	Bacteroidales	Bacteroidaceae	Bacteroides	uncultured_organism	0	0	0	0	0	0	0	0	0	0	0	0	0	0	0	0	0	0	0	0	0	0	0	0	0	0	0	0	0	0	0	0	0	0	0	0	0	0	0	0	0	0
89	Bacteria	Bacteroidota	Bacteroidia	Bacteroidales	Barnesiellaceae	Barnesiella	unidentified	0	0	0.00645083	0	0.000678699	0	0	0.00255895	0	0.0289339	0	0	8.87193e-05	0	0.0315907	0	0	0	0	0.00181626	0	0.000134342	4.39123e-05	0.00141443	0.0185825	0	0.0336183	0.00696654	0	0	0.000787923	0.0107516	0.014199	0	0.00388083	0	0	0	0	0.00437372	0	0
90	Bacteria	Bacteroidota	Bacteroidia	Bacteroidales	Barnesiellaceae	Barnesiella	Barnesiella_viscericola	0	0	0	0	0	0	0	0	0	0	0	0	0	0	0	0	0	0	0	0	0	0	0	0	0	0	0	0	0	0	0	0	0	0	0	0	0	0	0	0	0	0
91	Bacteria	Bacteroidota	Bacteroidia	Bacteroidales	Barnesiellaceae	Barnesiella	gut_metagenome	0	0	0	0	0	0	0	0	0	0	0	0	0	0	0	0	0	0	0	0	0	0	0	0	0	0	0	0	0	0	0	0	0	0	0	0	0	0	0	0	0	0
92	Bacteria	Bacteroidota	Bacteroidia	Bacteroidales	Barnesiellaceae	Barnesiella	uncultured_Firmicutes	0	0	0	0	0	0	0	0	0	0	0	0	2.21798e-05	0	0	0	0	0	0	0	0	0	0	0	0	0	8.70489e-05	0	0	0	0	0	0	0	0	0	0	0	0	0	0	0
93	Bacteria	Bacteroidota	Bacteroidia	Bacteroidales	Barnesiellaceae	Barnesiella	uncultured_bacterium	0	0	0	0.00126287	0	0	0	0	0.0150526	0	0	0	0.037617	0	0	0	0.00693729	0	0.00175375	0.0147202	0	0	0	0.00195326	0.00430795	0	0	0	0	0	0	0	0.0103016	0	0	0	0	0	0	0	0	0
94	Bacteria	Bacteroidota	Bacteroidia	Bacteroidales	Barnesiellaceae	Barnesiella	uncultured_organism	0	0	0	0	0	0	0	0	0	0	0.00109767	0	0	0	0	0	0	0	0	0	0	0	0	0	0	0	0.000400425	0	0	0	0	0	0	0	0	0.00708238	0	0.0258833	0	0	0	0
95	Bacteria	Bacteroidota	Bacteroidia	Bacteroidales	Barnesiellaceae	Coprobacter	unidentified	0	0	0	0	0.000193914	0	0	0	0	0	0.00239397	0	0.00403673	0	0	0	0	0	0	0	0	0	0	0	0	0	0	0	0	0	0.000378203	0	0	0	0	0	0	0	0	0.0067474	0	0
96	Bacteria	Bacteroidota	Bacteroidia	Bacteroidales	Barnesiellaceae	Coprobacter	Coprobacter_fastidiosus	0	0	0	0	0	0	0	0	0	0	0	0	0	0	0	0	0	0	0	0	0	0	0	0	0	0	0	0	0	0	0	0	0	2.27674e-05	0	0	0	0	0	0	0	0
97	Bacteria	Bacteroidota	Bacteroidia	Bacteroidales	Barnesiellaceae	Coprobacter	Coprobacter_secundus	0	0	0	0	0	0	0	0	0	0	0	0	0	0	0	0	0.000122567	0	0	0	0	0	0	0	0	0	0	0.000274273	0.000223192	0	0	0	0	0	0	0	0	0	0	0.000681334	0	0
98	Bacteria	Bacteroidota	Bacteroidia	Bacteroidales	Barnesiellaceae	Coprobacter	uncultured_bacterium	0	0	0	0	0	0	0	0	0	0	0	0	0	0	0	0	0	0	0	0	0	0	0	0	0	0	0	0	0	0	0	0	0	0	0	0	0	0	0	0	0	0
99	Bacteria	Bacteroidota	Bacteroidia	Bacteroidales	Barnesiellaceae	Coprobacter	uncultured_organism	0	0	0	0	0	0.00661391	0	0.0090985	0	0	0	0	0	0	0	0	0.00215718	0	0	0.000844773	0	0.000134342	0	0	0	0	0	0	0	0	0	0.00968313	0.00157427	0.0166942	0	0.00809745	0	0.00160458	0	0	0	0
100	Bacteria	Bacteroidota	Bacteroidia	Bacteroidales	Barnesiellaceae	uncultured	unidentified	0	0	0	0	0	0	0	0	0	0	0	0	0	0	0	0	0.00281904	0	0	0	0	0	0	0	0	0	0	0	0	0.000771445	0.00661855	0	0	0.00856053	0.000828226	0	0	0.00991242	0	0	0	0
101	Bacteria	Bacteroidota	Bacteroidia	Bacteroidales	Barnesiellaceae	uncultured	uncultured_bacterium	0	0	0	0	0	0	0	0	0	0	0	0	0	0	0	0	0	0	0	0	0	0	0	0	0	0	0	0	0	0	0	0	0	0	0	0	0	0	0	0	0	0
102	Bacteria	Bacteroidota	Bacteroidia	Bacteroidales	Barnesiellaceae	uncultured	uncultured_organism	0	0	0	0	0	0	0	0	0	0	0	0	0	0	0	0	0	0	0	0	0	0	0	0	0	0	0	0	0	0	0	0	0	0	0	0	0	0	0	0	0	0
103	Bacteria	Bacteroidota	Bacteroidia	Bacteroidales	Dysgonomonadaceae	Dysgonomonas	unidentified	0	0	0	0	0	0	0	0	0	0	0	0	0	0	0	0	0	0	0	0	0	0	0	0	0	0	0	0	0	0	0	0	0	0	0	0	0	0	0	0	0	0
104	Bacteria	Bacteroidota	Bacteroidia	Bacteroidales	Dysgonomonadaceae	Dysgonomonas	Dysgonomonas_mossii	0	0	0	0	0	0	0	0	0	0	0	0	0	0	0	0	0	0	0	0	0	0	0	0	0	0	0	0	0	0	0	0	0	0	0	0	0	0	0	0	0	0
105	Bacteria	Bacteroidota	Bacteroidia	Bacteroidales	Marinifilaceae	unidentified	unidentified	0	0	0	0	0	0	0	0	0	0	0	0	0	0	0	0	0	0	0	0	0	0	0	0	0	0	0	0	0	0	0	0	0	1.70755e-05	0	0	0	0	0	0	0	0
106	Bacteria	Bacteroidota	Bacteroidia	Bacteroidales	Marinifilaceae	Butyricimonas	unidentified	0	0.00174286	0.00185461	0	0.0013851	0	0.000390201	0.000550886	0.00322792	0	0.00291667	0	0	0.00319394	0.00951506	0	0	0	0.00113807	0	0	0.00161211	0.00213706	0	0	0	0	0	0	0.0025517	0.00119764	0.00297172	3.05684e-05	0.000933462	0.00863721	0.00322975	0	0	0	0.00846172	0.000520717	0
107	Bacteria	Bacteroidota	Bacteroidia	Bacteroidales	Marinifilaceae	Butyricimonas	Butyricimonas_sp.	0	0	0	0	0	0	0	0	0	0	0	0	0	0	0	0	0	0	0	0	0	0	0	0	0	0	0.00426539	0	0	0	0	0.000500851	0	0	0	0	0	0	0	0.00118684	0	0
108	Bacteria	Bacteroidota	Bacteroidia	Bacteroidales	Marinifilaceae	Butyricimonas	Butyricimonas_synergistica	0	0	0	0	0	0	0	0	0	0	0	0	0	0	0	0	0	0	0	0	0	0	0	0	0	0	0	0	0	0	0	0	0	0	0	0	0	0	0	0.000461549	0	0
109	Bacteria	Bacteroidota	Bacteroidia	Bacteroidales	Marinifilaceae	Butyricimonas	Butyricimonas_virosa	0	0	0	0	0	0	0	0.0033764	0	0	0	0	0	0	0	0	0	0	0	0	0	0	0	0	0	0	0	0	0	0	0	0	0	0	0	0	0	0	0	0.000131871	0	0
110	Bacteria	Bacteroidota	Bacteroidia	Bacteroidales	Marinifilaceae	Butyricimonas	Odoribacter_sp.	0	0	0	0	0	0	0	0	0	0	0	0	0	0	0	0	0	0	0	0	0	0	0	0	0	0	0	0	0	0	0	0	0	0	0	0	0	0	0	0	0	0
111	Bacteria	Bacteroidota	Bacteroidia	Bacteroidales	Marinifilaceae	Butyricimonas	uncultured_bacterium	0	0	0	0	0.000789506	0	0	0.000319869	0	0	0	0	0	0	0	0	0	0	7.46276e-05	0.000401267	0.000170641	0.000373173	0	0	0	0	0	0.00329128	0	0	0.00384506	0	0.000504379	0	0	0.000138418	0	0	0	0	0	0.000273406
112	Bacteria	Bacteroidota	Bacteroidia	Bacteroidales	Marinifilaceae	Butyricimonas	uncultured_organism	0	0.00276176	0.000309102	0	0	0	0.000559853	0.00163489	0.00535557	0	0	0	0	0	0	0	0	0	0.000820903	0.00732841	0.000682565	0	0.000395211	0	0.00287197	0	0	0	0.000173594	0	0.000346686	0	0.00700017	0.00350618	0	0	0	0	0	0	0	0
113	Bacteria	Bacteroidota	Bacteroidia	Bacteroidales	Marinifilaceae	Butyricimonas	unidentified	0	0	0	0	0	0	0	0	0	0	0	0	0	0	0	0	0	0	0	0	0	0	0	0	0	0	0	0	0	0	0	0	0	6.83021e-05	0	0	0	0	0	0	0	0
114	Bacteria	Bacteroidota	Bacteroidia	Bacteroidales	Marinifilaceae	Odoribacter	unidentified	0	0	0	0	0	0	0	0	0	0	0	0	0	0	0	0	0	0	0	0	0	0	0	0	0	0	0	0	0	0	0	0	0	0	0	0	0	0	0	0	0	0
115	Bacteria	Bacteroidota	Bacteroidia	Bacteroidales	Marinifilaceae	Odoribacter	Odoribacter_splanchnicus	0.0102145	0.00512133	0.00690777	0.00832439	0.00225771	0.00751837	0	0	0	0	0.0055929	0.00638978	0.00363749	0.00812018	0.00949704	0.000505514	0.00254939	0	0.00162315	0.00302006	0.00157843	0.00361232	0.00140519	0.000606183	0.00433639	0.00277479	0.00405648	0.00389468	0.00027279	0.00557814	0.00545243	0.0104845	0.0090024	0.0117195	0.00354954	0.00532909	0.000458059	0.000179953	0	0.00490121	0.000272757	0
116	Bacteria	Bacteroidota	Bacteroidia	Bacteroidales	Marinifilaceae	Odoribacter	uncultured_Odoribacter	0	0	0	0	0	0	0	0	0	0	0.00010454	0	6.65395e-05	0	0	0	0	0	0	0	0	0	0	0	0	0	0	0	0	0	0	0	0	0	0	0	0	0	0	0	0	0
117	Bacteria	Bacteroidota	Bacteroidia	Bacteroidales	Marinifilaceae	Odoribacter	uncultured_bacterium	0	0	0	0	0	0	0	0.000124394	0	0	0	0	0	0	0	0	0	0	0	0.000739176	0	0	0	0	0	0	0	0	0	0	0	0.00126882	0	0	0	0	0	0	0	0	0	0
118	Bacteria	Bacteroidota	Bacteroidia	Bacteroidales	Marinifilaceae	Sanguibacteroides	Gabonibacter_timonensis	0	0	0	0	0	0	0	0	0	0	0	0	0	0	0	0	0	0	0	0	0	0	0	0	0	0	0	0	0	0	0	0	0	0	0	0	0	0	0	0	0	0
119	Bacteria	Bacteroidota	Bacteroidia	Bacteroidales	Marinifilaceae	Sanguibacteroides	Sanguibacteroides_justesenii	0	0	0	0	0	0	0	0	0	0	0	0	0.000820654	0	0	0	0	0	0	0	0	0.000373173	0	0	0	0	0	0	0	0	0.00160736	0	0	0	0	0	0	0	0	0	0	0
120	Bacteria	Bacteroidota	Bacteroidia	Bacteroidales	Muribaculaceae	CAG-873	uncultured_bacterium	0	0	0	0	0	0	0	0	0	0	0	0	0	0	0	0	0	0	0	0	0	0.00261221	0	0	0	0	0	0	0	0	0	0	0	0	0	0	0	0	0	0	0	0
121	Bacteria	Bacteroidota	Bacteroidia	Bacteroidales	Muribaculaceae	Muribaculaceae	unidentified	0	0	0	0	0	0	0	0.000426492	0	0	0	0	0	0	0	0	0	0	0	0	0	0	0	0	0	0	0	0	0	0	0	0	0	0	0	0	0	0	0	0	0	0
122	Bacteria	Bacteroidota	Bacteroidia	Bacteroidales	Muribaculaceae	Muribaculaceae	Porphyromonadaceae_bacterium	0	0	0	0	0	0	0	0	0	0	0	0	0	0	0	0	0	0	0	0	0	0	0	0	0	0	0	0	0	0	0	0	3.05684e-05	0	0	0	0	0	0	0	0	0
123	Bacteria	Bacteroidota	Bacteroidia	Bacteroidales	Muribaculaceae	Muribaculaceae	gut_metagenome	0	0	0	0	0	0	0	0	0	0	0	0	0	0	0	0	0	0	0	0	0	0	0	0	0	0	0	0	0	0	0	0	0	0	0	0	0	0	0	0	0	0
124	Bacteria	Bacteroidota	Bacteroidia	Bacteroidales	Muribaculaceae	Muribaculaceae	uncultured_Porphyromonadaceae	0	0	0	0	0	0	0	0	0	0	0	0	0	0	0	0	0	0	0	0	0	0	0	0	0	0	0	0	0	0	0	0	0	0	0	0	0	0	0	0	0	0
125	Bacteria	Bacteroidota	Bacteroidia	Bacteroidales	Muribaculaceae	Muribaculaceae	uncultured_bacterium	0.0161559	0	0	0.0227737	0	0	0.00812636	3.5541e-05	0	0	0.061386	0.0138445	0	0	0	0	0.00607933	0	0.0754578	0	0	0.00773215	0.00957288	0	0	0	0	0.0476138	0	0	0.0471178	0	0.0256622	0	0	0.000830507	0	0.000419891	0	0.0161762	0.0116541	0
126	Bacteria	Bacteroidota	Bacteroidia	Bacteroidales	Muribaculaceae	Muribaculaceae	uncultured_organism	0	0	0	0	0	0	0	0.00110177	0	0	0	0	0	0	0	0	0	0	0	0	0	0	0	0	0	0	0	0	0	0	0	0	0	0	0	0	0	0	0	0	0	0
127	Bacteria	Bacteroidota	Bacteroidia	Bacteroidales	Muribaculaceae	Muribaculaceae	uncultured_rumen	0	0	0	0	0	0	0	0	0	0	0	0	0	0.00659088	0	0	0	0	0	0	0	0	0	0	0	0	0	0	0	0	0	0	0	0	0	0	0	0	0	0	0	0
128	Bacteria	Bacteroidota	Bacteroidia	Bacteroidales	Paludibacteraceae	unidentified	unidentified	0	0	0	0	0	0	0	0	0	0	0	0	0	0	0	0	0	0	0	0	0	0	0	0	0	0	0	0	0	0	0	0	0	0	0	0	0	0	0	0	0	0
129	Bacteria	Bacteroidota	Bacteroidia	Bacteroidales	Porphyromonadaceae	Porphyromonas	unidentified	0	0	0	0	0	0	0	0	0	0	0	0	0	0	0	0	0	0	0	0	0	0	0	0	0	0	0	0	0	0	0	0	0	0	0	0	0	0	0	0	0	0
130	Bacteria	Bacteroidota	Bacteroidia	Bacteroidales	Porphyromonadaceae	Porphyromonas	Bacteroidales_bacterium	0	0	0	0	0	0	0	0	0	0	0	0	0	0	0	0	0	0	0	0	0	0	0	0	0	0	0	0	0	0	0	0	0	0	0	0	0	0	0	0	0	0
131	Bacteria	Bacteroidota	Bacteroidia	Bacteroidales	Porphyromonadaceae	Porphyromonas	Porphyromonas_somerae	0	0	0	0	0	0	0	0	0	0	0	0	0	0	0	0	0	0	0	0	0	0	0	0	0	0	0	0	0	0	6.30338e-05	0	0	0	0	0	0	0	0	0	0	0
132	Bacteria	Bacteroidota	Bacteroidia	Bacteroidales	Porphyromonadaceae	Porphyromonas	Porphyromonas_uenonis	0	0	0	0	0	0	0	0	0	0	0	0	0	0	0	0	0	0	0	0	0	0	0	0	0	0	0	0	0	0	0	0	0	0	0	0	0	0	0	0	0	0
133	Bacteria	Bacteroidota	Bacteroidia	Bacteroidales	Prevotellaceae	unidentified	unidentified	0	0	0	0	0	0	0	0	0	0	0	0	0	0	0	0	0	0	0	0	0	0	0	0	0	0	0	0	0	0	0.000126068	0	0	0	0	0	0	0	0	0	0	0
134	Bacteria	Bacteroidota	Bacteroidia	Bacteroidales	Prevotellaceae	Alloprevotella	unidentified	0	0	0	0	0	0	0	0	0	0	0	0	0	0	0	0	0	0	0	0	0	0	8.78246e-05	0	0	0	0	0	2.47991e-05	0	0	0	0	0	0	0	0	0	0	0	0.0807607	0
135	Bacteria	Bacteroidota	Bacteroidia	Bacteroidales	Prevotellaceae	Alloprevotella	Prevotellaceae_bacterium	0	0	0	0	0	0	0	0	0	0	0	0	0	0.0239951	0	0	0	0	0	0	0	0.0500351	0	0	0	0	0	0	0	0	0	0	0	0	0	0	0	0.00109472	0	0	0	0
136	Bacteria	Bacteroidota	Bacteroidia	Bacteroidales	Prevotellaceae	Alloprevotella	gut_metagenome	0	0	0	0	0	0	0	0	0	0	0	0	0	0	0	0	0	0	0	0	0	0	0	0	0	0	0	0	0	0	0	0	0	0	0	0	0	0	0	0	0	0
137	Bacteria	Bacteroidota	Bacteroidia	Bacteroidales	Prevotellaceae	Alloprevotella	uncultured_Alloprevotella	0	0	0	0	0	0	0	0	0	0	0	0	0	0	0	0	0	0	0	0	0	0	0	0	0	0	0	0	0	0	0	0	0	0	0	0	0	0	0	0	0	0
138	Bacteria	Bacteroidota	Bacteroidia	Bacteroidales	Prevotellaceae	Alloprevotella	uncultured_Bacteroidales	0	0	0	0	0	0	0	0	0	0	0	0	0	0	0	0	0	0	0	0	0	0	0	0	0	0	0	0	0	0	0	0	0	0	0	0	0	0	0	0	0	0
139	Bacteria	Bacteroidota	Bacteroidia	Bacteroidales	Prevotellaceae	Alloprevotella	uncultured_bacterium	0	0	0	0	0	0	0	0	0	0	0	0.000491521	0	0	0	0	0	0	0	0	0	0	0	0	0	0	6.96391e-05	0	0	0	0	0	0	0	0	0	0	0	0	0.0233851	0	0
140	Bacteria	Bacteroidota	Bacteroidia	Bacteroidales	Prevotellaceae	Alloprevotella	uncultured_organism	0	0	0	0	0	0	0	0	0	0	0	0.0743836	0.000221798	0	0	0	9.80536e-05	0	0	0	0	0	0.0322902	0.0682966	0	0	0.000313376	0	0	0	0	0	0	0	0	0	0	0	0	0	0	0
141	Bacteria	Bacteroidota	Bacteroidia	Bacteroidales	Prevotellaceae	Paraprevotella	unidentified	0.00158711	0	0	0	0	0	0.000491992	0	0	0	0	0	0.000931553	0	0	0	0	0	0.000848889	0.0080887	0.000767885	0.000462735	0.00566469	0	0	0	0.0111597	0	0	0	0	0	0.0203739	0.00619842	0	0	0	0.00830784	0	0.000747269	0.000198368	0.00174296
142	Bacteria	Bacteroidota	Bacteroidia	Bacteroidales	Prevotellaceae	Paraprevotella	Paraprevotella_clara	0	0	0	0	0	0	0	0	0	0	0	0	2.21798e-05	0	0	0	0	0	0	0	0	0	0	0	0	0	0	0	0	0	0	0	0	0	0	0	0	0	0	0	0	0
143	Bacteria	Bacteroidota	Bacteroidia	Bacteroidales	Prevotellaceae	Paraprevotella	Paraprevotella_xylaniphila	0	0	0	0	0	0	0	0	0	0	0	0	0	0	0	0	0	0	0	0	0	0	0	0	0	0	0	0	0	0	0	0	0	0	0	0	0	0.000194949	0	0	0	0
144	Bacteria	Bacteroidota	Bacteroidia	Bacteroidales	Prevotellaceae	Paraprevotella	uncultured_bacterium	0.0101738	0	0	0.027762	0.00401679	0	0.00147598	0	0	0	0	0.00253953	0.00321608	0	0	0	0	0	0.00416982	0.0468849	0.00541786	0.00264207	0.00270792	0	0	0	0.011386	0	0	0	0.00403416	0.0355938	0	0.0376117	0	0	0.0140326	0.00386899	4.18054e-05	0.00650564	0.000223164	0.0021189
145	Bacteria	Bacteroidota	Bacteroidia	Bacteroidales	Prevotellaceae	Prevotella	unidentified	0.0740243	0.000294946	0.0876104	0.0124813	0.152333	0	0.379598	0	0	0	0	0.153437	0	0.200244	0.000216251	0.000239454	0.288106	0	0.000335824	0.0196832	0.256559	0.205768	0.283937	0.170068	0.0148148	0.0650416	0.00235032	0.271585	0	0.0419251	0.00236377	0	0.000351537	0.000500882	0.283798	0.0640183	0.315835	0.167057	6.96757e-05	0.025605	0.246646	0.0211035
146	Bacteria	Bacteroidota	Bacteroidia	Bacteroidales	Prevotellaceae	Prevotella	Massiliprevotella_massiliensis	0	0	0	0	0	0	0	0	1.32564e-05	0	0	0	0	0	0	0	0	0	0	0	0	0	0	0	0	0	0	0	0	0	0	0	0	0	0	0	0	0.000179953	0	0	0	0
147	Bacteria	Bacteroidota	Bacteroidia	Bacteroidales	Prevotellaceae	Prevotella	Prevotella_bivia	0	0	0	0	0	0.000480497	0	0	0	0	0	0	0	0	0	3.9909e-05	0	0	0	0	0	0	0	0	0	0	0	0	0	0	0	0	4.58526e-05	0	0	0	0	0	0	0	0	0
148	Bacteria	Bacteroidota	Bacteroidia	Bacteroidales	Prevotellaceae	Prevotella	Prevotella_buccalis	0	0	0	0	0	0	0	0	0	0	0	0	0	0	0	0	0	0	0	0	0	0	0	0	0	0	0	0	0	0	0	0	0	0	0	0	0	0	0	0	0	0
149	Bacteria	Bacteroidota	Bacteroidia	Bacteroidales	Prevotellaceae	Prevotella	Prevotella_colorans	0	0	0	0	0	0	0	0	0	0	0	0	0	0	0	0	0	0	0	0	0	0	0	0	0	0	0	0	0	0	0	0	0	0	0	0	0	0	0	0	0	0
150	Bacteria	Bacteroidota	Bacteroidia	Bacteroidales	Prevotellaceae	Prevotella	Prevotella_copri	0	0	0.011719	0	0.050196	0	0	0	0	0	0	0.025641	0	0	0	0	0.0871697	0	0	0.0243506	0.0706455	0.0950846	0	0	0	0	0	0	0	0.0822479	0	0	0	0	0	0	0.0211652	0.0272779	0	0	0.0851992	0
151	Bacteria	Bacteroidota	Bacteroidia	Bacteroidales	Prevotellaceae	Prevotella	Prevotella_corporis	0	0	0	0	0	0	0	0	0	0	0	0	0	0	0	0	0	0	0	0	0	0	0	0	0	0	0	0	0	0	0	0	7.6421e-05	0	0	0	0	0	0	0	0	0
152	Bacteria	Bacteroidota	Bacteroidia	Bacteroidales	Prevotellaceae	Prevotella	Prevotella_disiens	0	0	0	5.26194e-05	0	0.000254381	0	0	0	0	0	0	0	0	0	0.000106424	0	0	0	0.000126716	0	0	0	0	9.95237e-05	0	0	0	0	0	0	0	0	0	0	0	0	0	0	0.00015385	0	0
153	Bacteria	Bacteroidota	Bacteroidia	Bacteroidales	Prevotellaceae	Prevotella	Prevotella_melaninogenica	0	0	0	0	0	0	0	0	0	0	0	0	0	0	0	0	0	0	0	0	0	0	0	0	0	0	0	0	0	0	0	0	0	0	0	0	0	0	0	0	9.91842e-05	0
154	Bacteria	Bacteroidota	Bacteroidia	Bacteroidales	Prevotellaceae	Prevotella	Prevotella_salivae	0	0	0	0	0	5.65291e-05	0	0	0	0	0	0	0	0	0	0	0	0	0	0	0	0	0	0	0	0	0	0	0	0	0	0	0	0	0	0	0	0	0	0	0	0
155	Bacteria	Bacteroidota	Bacteroidia	Bacteroidales	Prevotellaceae	Prevotella	Prevotella_stercorea	0.0463924	0	0.010832	0	0.0312063	0	0	0	0	0	0.0678152	0.00393217	0	0	0	0	0	0	0	0	0	0.0182109	0	0	0.0117865	0	0.000121868	0	0	0	0.00778468	0	0	0	0	0	0	0.000464879	0	0	0.0230603	0
156	Bacteria	Bacteroidota	Bacteroidia	Bacteroidales	Prevotellaceae	Prevotella	Prevotella_timonensis	0	0	0	6.31433e-05	0	0	0	0	0	0	0	0	0	0	0	0	0	0	0	0	0	0	0	0	0	0	0	0	0	0	0	0	0	0	0	0	0	0	0	0	0	0
157	Bacteria	Bacteroidota	Bacteroidia	Bacteroidales	Prevotellaceae	Prevotella	Prevotellaceae_bacterium	0	0	0	0	0	0	0	0	0	0	0	0	0	0	0	0	0	0	0	0	0	0	0.0476302	0	0.017047	0	0	0	0	0	0	0	0	0	0	0	0	0	0	0	0.0138114	0.0563558
158	Bacteria	Bacteroidota	Bacteroidia	Bacteroidales	Prevotellaceae	Prevotella	Trichuris_trichiura	0	0	0	0	0	0	0	0	0	0	0	0	0	0	0	0	0	0	0	0	0	0	0	0	0	0	0	0	0	0	0	0	0	0	0	0	0	0	0	0	0	0
159	Bacteria	Bacteroidota	Bacteroidia	Bacteroidales	Prevotellaceae	Prevotella	gut_metagenome	0	0	0	0.0976826	0	0	0	0	0	0	0	0	0	0	0	0	0	0	0	0	0	0	0.00736263	0.0134707	0	0	0	0	0	0	0	0	0	0	0	0	0	0	0	0	0	0
160	Bacteria	Bacteroidota	Bacteroidia	Bacteroidales	Prevotellaceae	Prevotella	human_gut	0	0	0	0	0	0	0	0	0	0	0	0	0	0	0	0	0	0	0	0	0	0	0	0	0	0	0	0	0	0	0.000504271	0	0	0	0	0	0	0	0	0	0	0
161	Bacteria	Bacteroidota	Bacteroidia	Bacteroidales	Prevotellaceae	Prevotella	metagenome	0.091686	0	0.0373611	0	0.135601	0	0.091324	0	0	0	0	0.0747932	0	0.0128028	0	0	0.0809923	0	0	0	0	0.000746347	0.102155	0.0623021	0	0	0	0.0218321	0	0	0	0	0	0	0.0647436	0.0263225	0.0778191	0.0325865	0	0	0.00910015	0.00304164
162	Bacteria	Bacteroidota	Bacteroidia	Bacteroidales	Prevotellaceae	Prevotella	uncultured_Prevotella	0	0	0	0	0	0	0	0	0	0	0	0	2.21798e-05	0	0	0.0615796	0	0	0	0	0	0	0	0	0	0	0	0	0	0	0	0	0	0	0	0	0	0	0	0	0	0
163	Bacteria	Bacteroidota	Bacteroidia	Bacteroidales	Prevotellaceae	Prevotella	uncultured_Wautersiella	0	0	0	0	0	0	0	0	0	0	0	0	0	2.70673e-05	0	0	0	0	0	8.44773e-05	8.53206e-05	0	0.000146374	0.00356974	0	0	0	0	0	0.0221642	0	0	0	0	0	0	0	0	0	0	0.0217213	0
164	Bacteria	Bacteroidota	Bacteroidia	Bacteroidales	Prevotellaceae	Prevotella	uncultured_bacterium	0	0	0	0	0.000886463	0	0	0	0	0	0	0	0	0	0	0	0	0	0	0	0	0	0	0	0	0	0	0	0	0	0	0	0	0	0	0	0	0	0	0	0	0
165	Bacteria	Bacteroidota	Bacteroidia	Bacteroidales	Prevotellaceae	Prevotella	uncultured_organism	0	0	0	0	0	0	0	0	0	0	0	0	0	0	0	0.000146333	0	0	0	0	0.0275586	0	0	0	0	0	0	0	0	0	0	0	0	0	0	0	0	0	0	0	0.0290362	0
166	Bacteria	Bacteroidota	Bacteroidia	Bacteroidales	Prevotellaceae	Prevotellaceae_Ga6A1_group	uncultured_bacterium	0	0	0	0	0	0	0	0.00309207	0.00951144	0	0	0	2.21798e-05	0	0	0	0	0	0	0	0	0	0	0	0	0	0	0	0	0	0.0219358	0	0.0112492	0	0	0.00256073	0	0.0129566	0	0	0	0
167	Bacteria	Bacteroidota	Bacteroidia	Bacteroidales	Prevotellaceae	Prevotellaceae_NK3B31_group	unidentified	0	0	0	0	0	0	0	0	0	0	0	0	0	0	0	0	0	0	0	0	0	0	0	0	0	0	0	0	0	0	0.000189101	0	0	0	0	0	0	0	0	0.00015385	0	0
168	Bacteria	Bacteroidota	Bacteroidia	Bacteroidales	Prevotellaceae	Prevotellaceae_NK3B31_group	metagenome	0	0	0	0	0	0	0	0	0	0	0	0	0	0	0	0	0	0	0	0	0	0.00307495	0	0	0	0	0	0	0	0	0	0	0	0	0	0	0	0	0	0	0	0
169	Bacteria	Bacteroidota	Bacteroidia	Bacteroidales	Prevotellaceae	Prevotellaceae_NK3B31_group	uncultured_bacterium	0	0	0	0	0	0	0	0	0	0	0	0	0	0	0	0	7.35402e-05	0	0	0	0	0	0	0	0	0	0.000139278	0	0	0	0	0	0	0	0	0	0	0	0	0	0	0
170	Bacteria	Bacteroidota	Bacteroidia	Bacteroidales	Prevotellaceae	Prevotellaceae_NK3B31_group	uncultured_organism	0	0	0	0	0	0	0	0	0	0	0	0	0	0	0	0	0	0	0	0	0	0	0	0	0	0	0	0	0	0	0.0404992	0	0	0	0	0	0	0	0	0.0675399	0	0
171	Bacteria	Bacteroidota	Bacteroidia	Bacteroidales	Prevotellaceae	Prevotellaceae_UCG-001	unidentified	0	0	0	0	0	0	0	0	0	0	0	0	0	0	0	0	0	0	0	0	0	0	0	0	0	0	0	0	0	0	0	0	0	0	0	0	0	0	0	0	0	0
172	Bacteria	Bacteroidota	Bacteroidia	Bacteroidales	Prevotellaceae	Prevotellaceae_UCG-001	Marseilla_massiliensis	0	0	0	0	0	0	0	0	0	0	0	0	0	0	0	0	0	0	0	0	0	0	0	0	0	0	0	0	0	0	0	0	0	0	0	0	0	0	0	0.00507703	0	0
173	Bacteria	Bacteroidota	Bacteroidia	Bacteroidales	Prevotellaceae	Prevotellaceae_UCG-001	uncultured_bacterium	0	0	0	0	0	0	0	0	0	0	0	0	0	0	0	0	0	0	0	0	0	0	0	0	0	0	0	0	0	0	0	0	0	0	0	0	0	7.49805e-05	0	0	0	0
174	Bacteria	Bacteroidota	Bacteroidia	Bacteroidales	Prevotellaceae	Prevotellaceae_UCG-003	uncultured_bacterium	0	0	0	0	0	0	0	0	0	0	0	0	0	0	0	0	0	0	0	0	0	0.00725449	0	0	0	0	6.96391e-05	0	0	0	0	0	0	0	0	0	0	7.49805e-05	0	0	0	0
175	Bacteria	Bacteroidota	Bacteroidia	Bacteroidales	Prevotellaceae	Prevotellaceae_UCG-004	uncultured_bacterium	0	0	0	0	0	0	0	0	0	0	0	0	0	0	0	0	0	0	0	0	0	0.000403027	0	0	0	0	0	0	0	0	0	0	0	0	0	0	0	0	0	0	0	0
176	Bacteria	Bacteroidota	Bacteroidia	Bacteroidales	Prevotellaceae	uncultured	Prevotella_sp.	0	0	0	0	0	0	0	0	0	0	0	0	0	0	0	0	0	0	0	0	0	0	0	0	0	0	0	0	0	0	0	0	0	0	0	0	0	0	0	0	0	0
177	Bacteria	Bacteroidota	Bacteroidia	Bacteroidales	Prevotellaceae	uncultured	metagenome	0	0	0	0	0	0	0	0	0	0	0	0	0	0	0	0	0	0	0	0	0	0.00762766	0	0	0	0	0	0	0	0	0	0	0	0	0	0	0	0	0	0	0	0
178	Bacteria	Bacteroidota	Bacteroidia	Bacteroidales	Prevotellaceae	uncultured	uncultured_bacterium	0	0	0	0	0	0	0	0	0	0	0	0	0	0	0	0	0	0	0	0	0	0.0492589	0	0	0	0	0	0	0	0	0	0	0	0	0	0	0	0.0011697	0	0	0.00342186	0
179	Bacteria	Bacteroidota	Bacteroidia	Bacteroidales	Rikenellaceae	Alistipes	unidentified	0.0274285	0	0.0106573	0.0077561	0.00013851	0	0.0106542	0.0231727	1.98845e-05	0.0498414	0.0208035	0	0.0192299	0.0161998	0.00117136	0.0335901	0.0142423	0	0.00817172	0.0460612	0.00110917	0	0.00174185	0	0.0601976	0.0275222	0.0266021	0.0161821	0.00189713	0.0405602	0.000252135	0.0283816	0.0348174	0.0330924	0.0174401	0.0267839	0.00276289	0.0377602	0.0184083	0.00690125	2.47961e-05	0.0545616
180	Bacteria	Bacteroidota	Bacteroidia	Bacteroidales	Rikenellaceae	Alistipes	Alistipes_finegoldii	0	0.00394155	0.000389738	0	0	0.00587903	0	0	9.27945e-05	0	0.000146356	0	0	0.00101502	0.00347804	0	0	0	0	0.00118268	0.000341282	0	0	0	0.000270136	0.00321292	0.00616306	0.00148108	0	0.0011275	0	0.0146583	0.00715301	0.00587967	0.00274498	0	0.00101064	0	0	0	0	0
181	Bacteria	Bacteroidota	Bacteroidia	Bacteroidales	Rikenellaceae	Alistipes	Alistipes_indistinctus	0	0.00128704	0.00358828	0.000210478	0.000803357	0	0	0	0	0	0.000522701	0	0.00215144	0.00029774	0.000216251	0.000638544	0	0	3.73138e-05	0.00206969	0.000383943	0	0.00270792	0	0.00467761	0	0.000504883	0.00109709	0	0.00103848	0	0.00110187	0.000641937	0	0.00033129	0.00454472	0	0.00523364	0	0.00059342	0.00081827	0.00283659
182	Bacteria	Bacteroidota	Bacteroidia	Bacteroidales	Rikenellaceae	Alistipes	Alistipes_inops	0	0	0	0	0.00314417	0	0	0	0	0	0	0.0188416	0	0	0.0183633	0	0	0	0	0.00266103	0	0	0	0	8.5306e-05	0.00115506	0	0	0	0.000652761	0.000283652	0	0	0	0	0.00117655	0	0	0	0	0	0
183	Bacteria	Bacteroidota	Bacteroidia	Bacteroidales	Rikenellaceae	Alistipes	Alistipes_obesi	0	0	0.000739158	0	0.000623295	0	0.000186618	0.00280774	0	0	0.0025926	0.00557057	0.00248414	0	0.00218053	6.6515e-05	0.000392215	0	0.00166046	0.000696938	0.000682565	0.000164196	0.00130273	0.000875598	0.006597	0.000544337	0.00738174	0.00148108	0	0.00231433	0.0070913	0.00634412	0	0	0.000520599	0.00119962	0.000239935	0	0	0.0035825	0	0
184	Bacteria	Bacteroidota	Bacteroidia	Bacteroidales	Rikenellaceae	Alistipes	Alistipes_onderdonkii	0	0.00477276	0.00325229	0	0.000263169	0	0	0.00691273	0.000662818	0	0.00386799	0.00147456	0.00760768	0.000351874	0.0747509	0.0263666	0.000784429	0	0.00417914	0.00844773	0.000682565	0	0.00237126	0	0.00321319	0.00389002	0.0234336	0	0	0	0.00179646	0.00394003	0.00256775	0.0159485	0	0.000438323	0	0.00446884	0.197531	0.0139783	0.00195889	0.00756993
185	Bacteria	Bacteroidota	Bacteroidia	Bacteroidales	Rikenellaceae	Alistipes	Alistipes_putredinis	0	0	0	0	0	0	0	0	0	8.63055e-05	0	0	2.21798e-05	0	0	0	0	0	6.52991e-05	2.11193e-05	0	0	0	0	0	0	0	0	0	0	0	0.012922	0	2.27674e-05	4.73272e-05	0	0	0	0	4.3957e-05	0	0
186	Bacteria	Bacteroidota	Bacteroidia	Bacteroidales	Rikenellaceae	Alistipes	Alistipes_shahii	0	0.00474594	0.00503971	0.00212582	0.000775655	0.00570944	0.00393594	0.015336	0.00361899	0.0202602	0.00893819	0	0.0144169	0.00433076	0.0056766	0.00677123	0.00139726	0	0.00170711	0.00350581	0.000255962	0.000298539	0.000336661	0.00107766	0.00801877	0.00750123	0.00792145	0.00153593	0	0.00626057	0.00551546	0.00971652	0.00781023	0	0.00106486	0.00985074	0	0.000929758	0	0.00107695	0.00081827	0.00353719
187	Bacteria	Bacteroidota	Bacteroidia	Bacteroidales	Rikenellaceae	Alistipes	Alistipes_sp.	0.000935987	0	0.000591326	0.00032624	0	0	0	0.00218577	0	0	0.00268668	0	0.00104245	0	0	0	0.000514782	0	0.000186569	0.00228089	0	0	0	0.000606183	0.00166347	0.00345189	0.00250701	0.000548546	0	0.000356051	0.00107157	0	0.00278173	0.002789	0.000804562	0.00175329	3.63539e-05	0	0	0	0	0
188	Bacteria	Bacteroidota	Bacteroidia	Bacteroidales	Rikenellaceae	Alistipes	Alistipes_timonensis	0	0	0	0	0	0	0	0	0	0	0	0	4.43597e-05	0	0	0	0	0	0	0	0	0	0	0	0	0	0	0	0	0	0	0	0	0	0	0	0	0	0	0	0	0
189	Bacteria	Bacteroidota	Bacteroidia	Bacteroidales	Rikenellaceae	Alistipes	Bacteroides_sp.	0	0	0	0.00488308	0.000484785	0	0	0	0.0007291	0	0	0	0.00184093	0.00059548	0	0	0.000612835	0	0.00170711	0.00289335	0	0.000298539	0	0	0	0.000637272	0.00423058	0	0.000371987	0	0.00318321	0	0.00168126	0	0	0.000507532	0.00101064	0.00175454	0	0	0.00119021	0
190	Bacteria	Bacteroidota	Bacteroidia	Bacteroidales	Rikenellaceae	Alistipes	gut_metagenome	0	0	0	0	0	0	0	0	0	0	0	0	6.65395e-05	0	0	0	0	0	0	0	0	0	0	0	0	0	0	0	0.000247991	0	0	0	0	0	0	0	0	0	0	0	0	0
191	Bacteria	Bacteroidota	Bacteroidia	Bacteroidales	Rikenellaceae	Alistipes	uncultured_bacterium	0	0	0	0	0	0	0	0	0	0	0	0	2.21798e-05	0	0	0	0	0	0	0	0	0	0	0	0	0	0	0	0	0	0	0	0	0	0	0	0	0	0	0	0	0
192	Bacteria	Bacteroidota	Bacteroidia	Bacteroidales	Rikenellaceae	Alistipes	unidentified	0	0	0	0	0	0	0	0	0	0	0	0	0	0	0	0	0	0	0	0	0	0	0	0	0	0	0	0	0	0	0	0	0	0	0	0	0	0	0	0	0	0
193	Bacteria	Bacteroidota	Bacteroidia	Bacteroidales	Rikenellaceae	Rikenellaceae_RC9_gut_group	uncultured_bacterium	0	0	0	0.00966092	0	0	0	0	0.0775828	0	0	0	0	0.00908107	0	0	0	0	0	0	0	0.00815011	0	0	0	0	0	0	0	0	0	0	0	0	0	0	0	0.00131966	0	0	0	0
194	Bacteria	Bacteroidota	Bacteroidia	Bacteroidales	Rikenellaceae	SP3-e08	uncultured_bacterium	0	0	0	0	0	0	0	0	0	0	0	0	0	0	0	0	0	0	0	0	0	0	0	0	0	0	0	0	0	0	0	0	0	0	0	0	0	0	0	0	0	0
195	Bacteria	Bacteroidota	Bacteroidia	Bacteroidales	Tannerellaceae	unidentified	unidentified	0	0	0	0	0	0	0	0	0	0	0	0	0	0	0	0	0	0	0	0	0	0	0	0	0	0	0	0	0	0	0	0	0	0	0	0	0	0	0	0	0	0
196	Bacteria	Bacteroidota	Bacteroidia	Bacteroidales	Tannerellaceae	Parabacteroides	unidentified	0	0.000214506	0	2.10478e-05	0.00055404	0	0	0	1.98845e-05	0	0.00899046	0	4.43597e-05	0	0	0	0	4.05828e-05	1.86569e-05	0	0	4.47808e-05	0.0111537	0	0	0	0	0	0	0	0	0	0	0	0	0.000807438	0	0	0	0.0138245	0	0.00328087
197	Bacteria	Bacteroidota	Bacteroidia	Bacteroidales	Tannerellaceae	Parabacteroides	Monocercomonoides_sp.	0	0	0	0	0	0	0	3.5541e-05	0	0	0	0	0	0	0	0	0	0	0	0	0	0	0	0	0	0	0	0	0	0	0	0	0	0	0.000189309	0	0	0	0	0	0	0
198	Bacteria	Bacteroidota	Bacteroidia	Bacteroidales	Tannerellaceae	Parabacteroides	Parabacteroides_distasonis	0.0526594	0.00970639	0.0143531	0.00873482	0.00398909	0.0126625	0.00383415	0.00357187	0.00108039	0.0267115	0.0249015	0.000573441	0.00503482	0.00572473	0.00917266	0.00569369	0.00279453	0.0703705	0.000671648	0.0116156	0.00533254	0.00058215	0.00346907	0.00478211	0.0103789	0.0195696	0.00651126	0.00159078	0.0106636	0.00646827	0.0122286	0.0158603	0.00617482	0.0174341	0.00548995	0.0167024	0.0119168	0.00719813	0	0.00663751	0.0043889	0.00406692
199	Bacteria	Bacteroidota	Bacteroidia	Bacteroidales	Tannerellaceae	Parabacteroides	Parabacteroides_faecis	0	0	0	0	0	0	0	0	0	0	0	0	0	0	0	0	0	0	0	0	0	0	0	0	0	0	0	0	0	0	0	0	0	0	0	0	0	0	0	0	0	0
200	Bacteria	Bacteroidota	Bacteroidia	Bacteroidales	Tannerellaceae	Parabacteroides	Parabacteroides_goldsteinii	0	0.000160879	0.000201589	0.000862958	5.5404e-05	0	0	0	0.00480543	0	0.000637695	0.00139264	0.000221798	0.00142103	0.00129751	0	0	0	4.66422e-05	0.000232313	0.00106651	0.00058215	7.31872e-05	0	0	0	0.0037431	0	0	0.000682432	0	0.00160272	0.00155899	0	0.000189309	0.000530602	0	0.000389899	0	0.00171432	0	0
201	Bacteria	Bacteroidota	Bacteroidia	Bacteroidales	Tannerellaceae	Parabacteroides	Parabacteroides_gordonii	0	0	0	0	0	0	0	0	0	0	0	0	0	0	0.000252293	0	0	0	0	0	0	0	0	0	0	0	0	0	0	0	0.000378203	0	0.000519663	0	0	0	0	0	0	0	0	0
202	Bacteria	Bacteroidota	Bacteroidia	Bacteroidales	Tannerellaceae	Parabacteroides	Parabacteroides_johnsonii	0	0	0	0.0133443	0	0	0	0	0	0	0	0	0	0	0.00180209	0	0	0	0	0.0127983	0	0	0	0.000538829	0	0	0	0	0	0	0.00173343	0	0	0	0	0	0.00718352	0	0	0	0.000322349	0
203	Bacteria	Bacteroidota	Bacteroidia	Bacteroidales	Tannerellaceae	Parabacteroides	Parabacteroides_merdae	0.0470435	0.0847567	0.0166781	0.00183115	0.010596	0.0107688	0	0.0130436	0.00939876	0.0324509	0.015336	0.00253953	0.0417868	0.0202463	0.0277703	0	0.0129921	0.142621	0.00236943	0.0220697	0.00955591	0.00273163	0.0144471	0	0.019336	0.009891	0.0138234	0.00844761	0.00402986	0.0492538	0.00422327	0.0158269	0.0169655	0.0299562	0.0209659	0.0031144	0	0.0221492	4.18054e-05	0.00709906	0.0102408	0.0119615
204	Bacteria	Bacteroidota	Bacteroidia	Bacteroidales	Tannerellaceae	Parabacteroides	Parabacteroides_sp.	0	0	0	0.000199954	0	0	0	0.000302099	0	0	0	0	0	0.000311274	0	0	0	0	0.00227614	0	0.000127981	0	0	0	0	0	0	0	0	0	0.00132371	0.000233731	0	0.000796858	7.09908e-05	6.92089e-05	0	0	0	0	0	0
205	Bacteria	Bacteroidota	Bacteroidia	Bacteroidales	Tannerellaceae	Parabacteroides	gut_metagenome	0	0	0	0	0	0	0	0	0	0	0	0	0	0	0	0	0	0	0	0	0	0.00131357	0.00146374	0	0	0	0	0	0	0	0	0	0	0	0	0	0	0	0	0	0	0
206	Bacteria	Bacteroidota	Bacteroidia	Bacteroidales	Tannerellaceae	Parabacteroides	human_gut	0	0	0	0	0	0	0	0	0	0	0	0	0	0	0	0	0	0	0	0	0	0	0	0	0	0	0	0	0	0	0	0	0	0	0	0	0	0	0	0	4.95921e-05	0
207	Bacteria	Bacteroidota	Bacteroidia	Bacteroidales	Tannerellaceae	Parabacteroides	uncultured_bacterium	0	0	0	0	0	0	0	0	0	0	0	0	0	0	0	0	0	0	0	0	0	0	0	0	0	0	0	0.00197477	0	0	0.00658703	0	0	0	0	0.000415254	0	0	0	0	0	0
208	Bacteria	Bacteroidota	Bacteroidia	Bacteroidales	Tannerellaceae	Tannerellaceae	uncultured_bacterium	0	0	0	0	0	0	0	0	2.65127e-05	0	0	0	0	0	0	0	0	0	0	0	0	0	0	0	0	0	0	0	0	0	0	0	0	0	0	0	0	0	0	0	0	0
209	Bacteria	Bacteroidota	Bacteroidia	Bacteroidales	Tannerellaceae	Tannerellaceae	uncultured_organism	0	0	0	0	0	0	0	0	0	0	0	0	0	0	0	0	0	0	0	0	0	0	0	0	0	0	0	0	0	0	0	0	0	0	0	0	0	0	0	0	0	0
210	Bacteria	Bacteroidota	Bacteroidia	Bacteroidales	uncultured	uncultured	uncultured_bacterium	0	0	0	0	0	0	0	0	0	0	0	0	0	0	0	0	0	0	0	0	0	0	0	0	0	0	0	0	0	0	0	0	0	0	0	0	0	0	0	0	0	0
211	Bacteria	Bacteroidota	Bacteroidia	Cytophagales	Cyclobacteriaceae	uncultured	unidentified	0	0	0	0	0	0	0	0	0	0	0	0	0	0	0	0	0	0	0	0	0	0	0	0	0	0	0	0	0	0	0	0	0	0	0	0	0	0	0	0	0	0
212	Bacteria	Bacteroidota	Bacteroidia	Cytophagales	Cyclobacteriaceae	uncultured	uncultured_Bacteroidetes/Chlorobi	0	0	0	0	0	0	0	0	0	0	0	0	0	0	0	0	0	0	0	0	0	0	0	0	0	0	0	0	0	0	0	0	0	0	0	0	0	0	0	0	0	0
213	Bacteria	Bacteroidota	Bacteroidia	Flavobacteriales	Flavobacteriaceae	uncultured	gut_metagenome	0	0	0.000161271	0.000210478	0	0	0	0	0	0	0	0	0	0	0	0	0	0	0	0	0	0	0	0	0	0.00434142	0.00301189	0	0	0	9.45507e-05	0	0	0	0	0	0	0.000989743	0	0	0	0
214	Bacteria	Bacteroidota	Bacteroidia	Flavobacteriales	Weeksellaceae	Chryseobacterium	unidentified	0	0	0	0	0	0	0	0	0	0	0	0	0	0	0	0	0	0	0	0	0	0	0	0	0	0	0	0	0	0	0	0	0	0	0	0	0	0	0	0	0	0
215	Bacteria	Campilobacterota	Campylobacteria	Campylobacterales	Campylobacteraceae	Campylobacter	Campylobacter_concisus	0	0	0	0	0	0	0.000101792	0	0	0	0	0	0	0	0	0	0	0	0	0	0	0	0	0	0	0	0	0	0	0	0	0	0	0	0	0	0	0	0	0	0.000867862	0
216	Bacteria	Campilobacterota	Campylobacteria	Campylobacterales	Campylobacteraceae	Campylobacter	Campylobacter_gracilis	0	0	0	0	0	0	0	0	0	0	0	0	0	0	0	0	0	0	0	0	0	0	0	0	0	0	0	0	0	0	0	0	0	0	0	0	0	0	0	0	0	0
217	Bacteria	Campilobacterota	Campylobacteria	Campylobacterales	Campylobacteraceae	Campylobacter	Campylobacter_hominis	0	0	0	0	0	8.47937e-05	0	0	0	0	0	0	0	0	0	7.9818e-05	0	0	0	0	0	0	0	0	0	0	0	0	0	0	0	0	4.58526e-05	0	0	0	0	0	0	0	0	0
218	Bacteria	Campilobacterota	Campylobacteria	Campylobacterales	Campylobacteraceae	Campylobacter	Campylobacter_pinnipediorum	0	0	0	0	0	0	0	0	0	0	0	0	0	0	0	0	0	0	1.86569e-05	0	0	0	0	0	0	0	0	0	0	0	0	0	0	0	0	0	0	0	0	0	0	0
219	Bacteria	Campilobacterota	Campylobacteria	Campylobacterales	Campylobacteraceae	Campylobacter	Campylobacter_ureolyticus	0	0	0	0	0	0	0	0	0	0	0	0	0	0	0	0	0	0	0	0	0	0	0	0	0	0	0	0	0	0	0	0	0	0	0	0	0	0	0	0	0	0
220	Bacteria	Chloroflexi	Anaerolineae	Anaerolineales	Anaerolineaceae	uncultured	uncultured_soil	0	0	0	0	0	0	0	0	0	0	0	0	0	0	0	0	0	0	0	0	0	0	0	0	0	0	0	0	0	0	0	0	0	0	0	0	0	0	0	0	0	0
221	Bacteria	Cyanobacteria	Cyanobacteriia	Chloroplast	Chloroplast	Chloroplast	unidentified	0	0.000294946	0	0	0	0	8.48263e-05	7.1082e-05	0.00014582	0	0.00010454	0	0.000110899	0	0	0	0	0	0	0	0	0	5.85497e-05	0	0	0	0	0	0	0	9.45507e-05	0	0	0	0	0	0	0.000824786	0	0.000549463	0	0
222	Bacteria	Cyanobacteria	Cyanobacteriia	Chloroplast	Chloroplast	Chloroplast	Actinidia_chinensis	0	0	0	0	0	0	0	0	0	0	0	0	0	0	0	6.6515e-05	0	0	0	0	0	0	0	0	0	9.29356e-05	0	0	0	0	0	0	0.00111575	0	0	0	0	0	0	0	0	0
223	Bacteria	Cyanobacteria	Cyanobacteriia	Chloroplast	Chloroplast	Chloroplast	Allium_cepa	0	0	0	0	0	0	0	0	0	0	0	0	0	0	0	0	0	0	0	0	0	0	0	0	5.68707e-05	0	0	0	0	0	0	0	0	0	0	0	0	0	0	0	0	0
224	Bacteria	Cyanobacteria	Cyanobacteriia	Chloroplast	Chloroplast	Chloroplast	Carnegiea_gigantea	0	0	0	0	0	0	0	0	0	0	0	0	0	0	0	0	0	0	0	0	0	0	0	0	0	0	0	0	0	0	0	0	0	0	0	0	0	0	0	0	0	0
225	Bacteria	Cyanobacteria	Cyanobacteriia	Chloroplast	Chloroplast	Chloroplast	Vaccinium_macrocarpon	0	0	0	0	0	0	0	0	0	0.000151035	0	0	0	0	0	0	0	0	0	0	0	0	0	0	0	0	0	0	0	0	0	0	0	0	0	0	0	0	0	0	0	0
226	Bacteria	Cyanobacteria	Vampirivibrionia	Gastranaerophilales	Gastranaerophilales	Gastranaerophilales	unidentified	0	0	0	0	0	0	0	0	0	0	0	0	0	0	0	0	0	0	0	0	0	0	0	0	0	0	0	0	0	0	0	0	0	0	0	0	0	0	0	6.59355e-05	0	0
227	Bacteria	Cyanobacteria	Vampirivibrionia	Gastranaerophilales	Gastranaerophilales	Gastranaerophilales	Acinetobacter_sp.	0	0	0	0	0	0	0	0	0	0	0	0	0	0	0.000648754	0	0	0	0	0.00177402	0	0	0	0	0	0	0	0	0	0	0	0	0	0	0	0	0	0	0	0	0	0
228	Bacteria	Cyanobacteria	Vampirivibrionia	Gastranaerophilales	Gastranaerophilales	Gastranaerophilales	Candidatus_Gastranaerophilales	0	0	0	0	0	0	0	0	6.62818e-06	0	0	0	0	0	0	0	0	0	0	0	0	0	0	0	0	0	0	0	0	0	0	0	0	0	0	0	0	0	0	0	0	0
229	Bacteria	Cyanobacteria	Vampirivibrionia	Gastranaerophilales	Gastranaerophilales	Gastranaerophilales	Candidatus_Melainabacteria	0	0	0	0	0	0	0	0	0	0	0	0	0	0	0	0	0	0	0	0	0	0	0	0	0	0	0	0	0	0	0	0	0	0	0	0	0	0	0	0	0	0
230	Bacteria	Cyanobacteria	Vampirivibrionia	Gastranaerophilales	Gastranaerophilales	Gastranaerophilales	uncultured_bacterium	0	0	0	0	0	0	0	0	0.00195531	0.000496256	0	0	0	0	0	0	0	0	0	0.00451954	0	0	0	0	0	0	0.017166	0	0	0	0.00157585	0	0	0	0	0.014903	0	0	0	0.0141322	0	0
231	Bacteria	Desulfobacterota	Desulfobulbia	Desulfobulbales	Desulfobulbaceae	uncultured	uncultured_Aminicenantes	0	0	0	0	0	0	0	0	0	0	0	0	0	0	0	0	0	0	0	0	0	0	0	0	0	0	0	0	0	0	0	0	0	0	0	0	0	0	0	0	0	0
232	Bacteria	Desulfobacterota	Desulfovibrionia	Desulfovibrionales	Desulfovibrionaceae	unidentified	unidentified	0	0	0	0	0	0	0	0	0	0	0	0	0	0	0	0	0	0	0	0.000168955	0	0	0	0	0	0	0	0	0	0	0	0	0	0	0	0	0	0	0	0	0	0
233	Bacteria	Desulfobacterota	Desulfovibrionia	Desulfovibrionales	Desulfovibrionaceae	Bilophila	unidentified	0.00191267	0	0.00221747	0.00455684	0.000470934	0.0133691	0.00108578	0.00312761	0	0	0	0.00745474	0.0025285	0.00242252	0.00702817	0.00610608	0.00105408	0	0.000988815	0.0067793	0.00341282	5.97077e-05	0	0.00437799	0.00790503	0.00509818	0.00370828	0.00499177	0	0.00433196	0.00576759	0	0.000779495	0.00522511	0.00123051	0.00339124	0.00217396	0.00290924	0.00974067	0	0	0.00312708
234	Bacteria	Desulfobacterota	Desulfovibrionia	Desulfovibrionales	Desulfovibrionaceae	Bilophila	bacterium_NLAE-zl-H528	0	0	0	0	0	0	0	0	0	0	0	0	0	0	0	0	0	0	0	0	0	0	0	0	0	0	0	0	0	0	0	0	0	0	0	0	0	0	0.000195092	0	0	0
235	Bacteria	Desulfobacterota	Desulfovibrionia	Desulfovibrionales	Desulfovibrionaceae	Bilophila	uncultured_bacterium	0	0	0	0	0.00229926	0	0	0	0	0	0.00478794	0	0	0	0	0	0	0	0	0	0	0	0.00158084	0	0	0	0	0	0.00057038	0	0	0.0180307	0.00826876	0	0	0	0	0	0	0.00171432	0.00136378	0
236	Bacteria	Desulfobacterota	Desulfovibrionia	Desulfovibrionales	Desulfovibrionaceae	Desulfovibrio	unidentified	0	0	0	0	0	0	0	0	0	0	0	0	8.87193e-05	0	0	0	0	0	0	0.000105597	0	2.98539e-05	0	0	0	0	0	0	0	0	0	0	0	0.000540725	0	0	0	0	0	0	0	0
237	Bacteria	Desulfobacterota	Desulfovibrionia	Desulfovibrionales	Desulfovibrionaceae	Desulfovibrio	Desulfovibrio_desulfuricans	0	0	0	0	0	0	0	0	0	0	0	0	0	0	0	0	0	0	0	0	0	0	0	0	0	0	0	0	0	0	0	0.000200341	0	0	0	0	0	0	0	0	0	0
238	Bacteria	Desulfobacterota	Desulfovibrionia	Desulfovibrionales	Desulfovibrionaceae	Desulfovibrio	Desulfovibrio_fairfieldensis	0	0	0	0	4.1553e-05	0	0	0	0	0	0.00015681	0.000737282	0	0	0	0	0	0	0	0	0	0	0	0	0	0.00114178	0.00111423	0	0	0	0.00236377	0	0	0	0	0	0	0	0	0	0	0
239	Bacteria	Desulfobacterota	Desulfovibrionia	Desulfovibrionales	Desulfovibrionaceae	Desulfovibrio	Desulfovibrio_legallii	0	0	0	0	0	0	0	0.00293213	0	0	0	0	0	0	0	0	0	0	0	0	0	0	0	0	0	0	0	0	0	0	0	0	0	0	0	0	0	0	0	0	0	0
240	Bacteria	Desulfobacterota	Desulfovibrionia	Desulfovibrionales	Desulfovibrionaceae	Desulfovibrio	Desulfovibrio_piger	0	0	0	0	0	0	0	0	0	0	0	0	0.00716409	0	0	0	0	0	0	0.0253221	0	0.00926963	0	0	0	0	0	0	0	0	0	0	0	0	0	0	0	0.000209945	0	0.00819798	0	0
241	Bacteria	Desulfobacterota	Desulfovibrionia	Desulfovibrionales	Desulfovibrionaceae	Desulfovibrio	bacterium	0	0	0	0	0	0	0	0	0	0	0	0	0	0	0	0	0	0	0	0	0	0	0	0	0	0	0	0	0	0	0	0	0	0	0	0	0	0	0	0	0	0
242	Bacteria	Desulfobacterota	Desulfovibrionia	Desulfovibrionales	Desulfovibrionaceae	Desulfovibrio	metagenome	0	0	0	0	0	0	0	0	0	0	0	0	0	0.0354716	0	0.00713041	0	0	0	0	0	0	0	0	0	0	0	0	0	0	0	0	0	0	0	0	0	0	0	0	0	0
243	Bacteria	Desulfobacterota	Desulfovibrionia	Desulfovibrionales	Desulfovibrionaceae	Lawsonia	Lawsonia_intracellularis	0	0	0	0	0	0	0	0	0	0	0	0	0	0	0	0	0	0	0	0	0	0	0	0	0	0	0	0	0	0	0	0	0	0	0	0	0	0	0	0	0	0
244	Bacteria	Desulfobacterota	Desulfovibrionia	Desulfovibrionales	Desulfovibrionaceae	Mailhella	unidentified	0	0	0	0	0	0	0	0	0	0	0	0	0	0	0	0	0	0	0	0	0	0	0	0	0	0	0	0	0	0	0	0	0	0	0	0	0	0	0	0	0	0
245	Bacteria	Desulfobacterota	Desulfovibrionia	Desulfovibrionales	Desulfovibrionaceae	Mailhella	Desulfovibrio_sp.	0	0	0	0	0	0	0	0	0	0	0	0	0	0	0	0	0	0	0	0	0	0.000895616	0	0	0	0	0	0	0	0	0	0	0	0	0	0	0	0	0	0.000483527	0	0
246	Bacteria	Desulfobacterota	Desulfovibrionia	Desulfovibrionales	Desulfovibrionaceae	uncultured	unidentified	0	0	0	0	0	0	0	0	0	0	0	0	0	0	0	0	0	0	0	0	0	0	0	0	0	0	0	0	0	0	0	0	0	0	0	0	0	0	0	0	0	0
247	Bacteria	Desulfobacterota	Desulfovibrionia	Desulfovibrionales	Desulfovibrionaceae	uncultured	uncultured_Desulfovibrionaceae	0	0	0	0	0	0	0	0.0019903	0	0	0	0	0	0.00150223	0	0	0	0	0	0	0	0	0.000263474	0	0	0	0	0	0	0	0	0	0	0.000489499	0	0	0	0	0	0.000219785	0	0
248	Bacteria	Firmicutes	unidentified	unidentified	unidentified	unidentified	unidentified	0	0	0	0	0	0	0	0	0	0	0	0	0	0	0	0	0	0	0	0	0	0	0	0	0	0	0	0	0	0	0	0	0	0	0	0	0	0	0	0	0	0
249	Bacteria	Firmicutes	Bacilli	unidentified	unidentified	unidentified	unidentified	0	0	0	0	0	0	0	0	0	0	0	0	0	0	0	0	0	0	0	0	0	0	0	0	0	0	0	0	0	0	0	0	0	0	0	0	0	0	0	0	0	0
250	Bacteria	Firmicutes	Bacilli	Acholeplasmatales	Acholeplasmataceae	Anaeroplasma	uncultured_bacterium	0	0	0	0	0	0	0	0	0	0	0	0	0	0	0	0	0	0	0	0	0	0.00283612	0	0	0	0	0	0	4.95983e-05	0	0	0	0	0	0	0	0	0	0	0	0	0
251	Bacteria	Firmicutes	Bacilli	Bacillales	Bacillaceae	Anaerobacillus	unidentified	0	0	0	0	0	0	0	0	0	0	0	0	4.43597e-05	0	0	0	0	0	0	0	0	0	0	0	0	0	0	0	0	0	0	0	0	0	0	0	0	0	0	0	0	0
252	Bacteria	Firmicutes	Bacilli	Bacillales	Bacillaceae	Anaerobacillus	uncultured_bacterium	0	0	0	0	0	0	0	0	0	0	0	0	0	0	0	0	0	0	0	0	0	0	0	0	0	0	0	0	0	0	0	0	0	0	0	0	0	0	0	0	0	0
253	Bacteria	Firmicutes	Bacilli	Bacillales	Bacillaceae	Bacillus	unidentified	0	0	0	0	0	0	0	0	0	6.47291e-05	0	0	0	0	0	0	0	0	0	0	0	0	0	0	0	0	0	0	0	0	0	0	0	0	0	4.61393e-05	0	0	0	0	0	0
254	Bacteria	Firmicutes	Bacilli	Bacillales	Bacillaceae	Bacillus	Bacillus_thermoamylovorans	0	0	0	0	0	0	0	0	0	0	0	0	0	0	0	0	0	0	0	0	0	0	0	0	0	0	0	0	0	0	0	0	0	0	0	0	0	0	0	0	0	0
255	Bacteria	Firmicutes	Bacilli	Erysipelotrichales	unidentified	unidentified	unidentified	0	0	0	0	0	0	0	0	0	0	0	0	0	0	0	0	0	0	0	0	0	0	0	0	0	0	0	0	0	0	0	0	0	0	0	0	0	0	0	0	0	0
256	Bacteria	Firmicutes	Bacilli	Erysipelotrichales	Erysipelatoclostridiaceae	unidentified	unidentified	0	0	0	0	0	0	0	0	0	0	0	0	0	0	0	0	0	0	0	0	0	0	0	0	0	0	0	0	0	0	0	0	0	0	0	0	0	0	0	0	0	0
257	Bacteria	Firmicutes	Bacilli	Erysipelotrichales	Erysipelatoclostridiaceae	Asteroleplasma	metagenome	0	0	0	0	0	0	0	0.00115508	0	0	0.00273895	0	0.000354877	0	0	0	0	0	0	0	0	0	0	0	0	0	0	0	0	0	0	0	0	0	0	0	0	0	0	0	0	0
258	Bacteria	Firmicutes	Bacilli	Erysipelotrichales	Erysipelatoclostridiaceae	Asteroleplasma	uncultured_bacterium	0	0	0	0	0	0	0	0	0	0	0	0	0	0	0	0	0	0	0	0	0	0	0	0	0	0	0	0	0	0	0	0	0	0	0	0	0	8.99766e-05	0	0	0	0
259	Bacteria	Firmicutes	Bacilli	Erysipelotrichales	Erysipelatoclostridiaceae	Candidatus_Stoquefichus	unidentified	0	0	0	0	0	0	0	0	0	0	0	0	0	0	0	0	0	0	0	0.000422386	0	0	0	0	0	0	0	0	0	0	0	0	0	0	0	0	0	0	0.000668887	0	0	0
260	Bacteria	Firmicutes	Bacilli	Erysipelotrichales	Erysipelatoclostridiaceae	Catenibacterium	unidentified	0	0	0	0	0	0	0	0	0	0	0	0	0	0	0	0	0	0	0	0	0	0	0	0	0	0	0	0	0	0	0	0	0	0	0	0	0	0	0	0	0	0
261	Bacteria	Firmicutes	Bacilli	Erysipelotrichales	Erysipelatoclostridiaceae	Catenibacterium	Catenibacterium_mitsuokai	0	0	0	0	0	0	0	0	0	0	0	0	0	0	0	0	0	0	0	0	0	0	0	0	0	0	0	0	0	0	0	0	0	0	0	0	0	0	0	0	0	0
262	Bacteria	Firmicutes	Bacilli	Erysipelotrichales	Erysipelatoclostridiaceae	Catenibacterium	uncultured_Catenibacterium	0	0	0	0	0	0	0	0	0	0	0	0	0	0	0	0	0	0	0	0	0	0	0	0	0	0	0	0	0	0	0	0	0	0	0	0	0	0	0	0	0	0
263	Bacteria	Firmicutes	Bacilli	Erysipelotrichales	Erysipelatoclostridiaceae	Catenibacterium	uncultured_bacterium	0	0	0	0	0	0	0	0	0	0	0.00260305	0	0	0	0.00129751	0	0	0	0	0	0.00883068	0.00371681	0	0	0.00440748	0	0.00172357	0	0	0.00142421	0.01122	0	0	0	0	0	0	0.00964249	0	0	0.00580228	0
264	Bacteria	Firmicutes	Bacilli	Erysipelotrichales	Erysipelatoclostridiaceae	Coprobacillus	unidentified	0	0	0	0	0	0	0	0	0	0	0	0	0	0	0	0	0	0	0	0	0	0	0	0	0	0	0	0	0	0	0	0	0	0	0	0	0	0	0	0	0	0
265	Bacteria	Firmicutes	Bacilli	Erysipelotrichales	Erysipelatoclostridiaceae	Coprobacillus	Coprobacillus_cateniformis	0	0	0	0	0	0	0	0	0	0	0	0	0.000221798	0.000351874	0	0	0	0	0	0	0	0	0	0	0	0	0	0	0	0	0	0	0.000213979	0	0	0	0	4.49883e-05	0	0	0	0
266	Bacteria	Firmicutes	Bacilli	Erysipelotrichales	Erysipelatoclostridiaceae	Erysipelatoclostridiaceae	Firmicutes_bacterium	0	0	0	0	0	0	0	0	0	0	0	0	0	0	0.0119118	0	0	0	0	0	0	0.000268685	0	0	0	0	0	0	0	0	0	0	0	0	0	0	0	0	0	0	0	0
267	Bacteria	Firmicutes	Bacilli	Erysipelotrichales	Erysipelatoclostridiaceae	Erysipelatoclostridiaceae	uncultured_bacterium	0	0	0	0	0	0	0	0	0	0	0	0	0	0	0	0	0	0	0	0	0	0	0	0	0	0	0	0	0	0	0	0	0.000794779	0	0	0	0	0	0	0	0	0
268	Bacteria	Firmicutes	Bacilli	Erysipelotrichales	Erysipelatoclostridiaceae	Erysipelatoclostridium	unidentified	0	0.0022255	0	0	0	0	0	0	0	0	0	0	0	0	0	0	0	0	0	0.000591341	0	0	0	0	0	0	0	0	0	0	0	0	0	0	0	0	0	0	0.000111481	0	0	0
269	Bacteria	Firmicutes	Bacilli	Erysipelotrichales	Erysipelatoclostridiaceae	Erysipelatoclostridium	Clostridiaceae_bacterium	0	0	0	0	0	0	0	0	0	0	0	0	0	0	0	0	0	0	0	8.44773e-05	0	0	0	0	0	0	0	0	0	0	0	0	0	0	0	0	0	0	0	0	0	0
270	Bacteria	Firmicutes	Bacilli	Erysipelotrichales	Erysipelatoclostridiaceae	Erysipelatoclostridium	Clostridiales_bacterium	0	0	0	0	0	0	0	0	0	0	0	0	0	0	0	0	0	0	0	0	0	0	0	0	0	0	0	0	0	0	0	0	0	0	0	0	0	0	4.18054e-05	0	0	0
271	Bacteria	Firmicutes	Bacilli	Erysipelotrichales	Erysipelatoclostridiaceae	Erysipelatoclostridium	Erysipelatoclostridium_ramosum	0	0.000429012	0	0.000199954	0	0.00180893	0	0	0	0	0	0	0	0	0	0	0	0.00124454	0	0.000992608	0	0	0	0	0	0	0	0	0	0	0	0	0	0	0	0	5.81662e-05	0	0.00149106	0	0	0
272	Bacteria	Firmicutes	Bacilli	Erysipelotrichales	Erysipelatoclostridiaceae	Erysipelatoclostridium	Massiliomicrobiota_timonensis	0	0	0	0	0	0	0	0	0	0	0	0	0.00232888	0	0	0	0	0	0	0.00329461	0	0	0	0	0.000440748	0	0	0	0	0	9.45507e-05	0	0.000320968	6.26103e-05	0	0	0	0	0	0	0	0
273	Bacteria	Firmicutes	Bacilli	Erysipelotrichales	Erysipelatoclostridiaceae	Erysipelatoclostridium	Clostridium_saccharogumia	0	0	0	0	0	0	0	0	0	0	0	0	0	0	0	0	0	0	0	0	0	0	0	0	0	0	0	0	0	0	0	0	0	0	0	0	0	0	0	0	0	0
274	Bacteria	Firmicutes	Bacilli	Erysipelotrichales	Erysipelatoclostridiaceae	Erysipelatoclostridium	Clostridium_spiroforme	0	0.000241319	0	0.00182063	0	0	0	0	0	0.000129458	6.27241e-05	0	0	0	0	0	0.000318674	0.00104162	0	0.000232313	0	0	0	0	0	0	0	0	0.000136395	0	0	0	0	0.0002789	0	0	0	0	0.000738563	0	0	0
275	Bacteria	Firmicutes	Bacilli	Erysipelotrichales	Erysipelatoclostridiaceae	Erysipelatoclostridium	uncultured_Firmicutes	0	0	0	0	0	0	0	0	0	0	0	0	0	0	0	0	0	0	0	0	0	0	0	0	0	0	0	0	0	0	0	0	0	0	0	0	0	0	0	0	0	0
276	Bacteria	Firmicutes	Bacilli	Erysipelotrichales	Erysipelatoclostridiaceae	Erysipelatoclostridium	uncultured_bacterium	0	0	0	0	0	0	0	0	0	0	0	0	0	0	0	0	0	0	0	0	0	0	0	0	0	0	0	0	0	0	0	0	0	0	0	0	0	0	0	0	0	0
277	Bacteria	Firmicutes	Bacilli	Erysipelotrichales	Erysipelatoclostridiaceae	Erysipelotrichaceae_UCG-003	unidentified	0.000488341	0	0.00503971	0.00571447	0.00223001	0	0.000458062	0.000621968	0.00580628	0.0134637	0.000428615	0.00245761	0.000665395	0.00185411	0.000973131	0.00595975	0.00186302	0	0.00012127	0	0.000981187	0.000447808	0.00062941	0.00498417	0	0.00159318	0.00346454	0.00586945	0.00803492	0.00121651	0	0.00320545	0.00129916	0.00887358	0.00222438	0.00346045	0	0	0	0.00136267	0.000272757	0.000717691
278	Bacteria	Firmicutes	Bacilli	Erysipelotrichales	Erysipelatoclostridiaceae	Erysipelotrichaceae_UCG-003	uncultured_bacterium	0	0	0	0	0	0	0	0	0	0	0	0	0	0	0	0	0	0	0	0	0	0	0	0	0	0	0	0	0	0	0	0	0	0	0	0	0	0	0	0	0	0
279	Bacteria	Firmicutes	Bacilli	Erysipelotrichales	Erysipelatoclostridiaceae	Erysipelotrichaceae_UCG-003	uncultured_organism	0	0	0.000268785	0	0	0	0	0	0	0	0	0	0	0	0	0	0	0	0	0	0	0	0	0	0	0	0	0	0	0	0	0	0	0	0	0	0	0	0	0	0	0
280	Bacteria	Firmicutes	Bacilli	Erysipelotrichales	Erysipelatoclostridiaceae	UCG-004	uncultured_bacterium	0	0	0	0	0	0	0	0	0	0	0	0	0.000266158	0	0	0.00226151	0	0	0.000531721	0	0.00507658	0.000298539	0	0	0	0	0	0	0	0	0	0	0	0.00758723	0	0.000207627	0	0	0	0.000769248	0	0
281	Bacteria	Firmicutes	Bacilli	Erysipelotrichales	Erysipelotrichaceae	unidentified	unidentified	0	0	0	0	0	0	0	0	0	0	0	0	0	0	0	0	0	0	0	0	0	0	0	0	0	0	0	0	0	0	0	0	0	0	0	0	0	0.00262432	0	0	0	0
282	Bacteria	Firmicutes	Bacilli	Erysipelotrichales	Erysipelotrichaceae	Dielma	Dielma_fastidiosa	0	0	0	5.26194e-05	0	0	0	0	0.000225358	0	0	0	0	0	0	0	0	0	0	0.000168955	0	0	0	0	0	0	0	0	0	0	0	0.000233731	0	0	0	0	0	0	0	0	0	0
283	Bacteria	Firmicutes	Bacilli	Erysipelotrichales	Erysipelotrichaceae	Dielma	Dielma_sp.	0	0	0	0	0	0	0	0	0	0	0	0	0	0	0	0	0	0	0	0	0	0	0	0	0	0	0	0	0	0	0	0	0	0	0	0	0	0	0	0	0	0
284	Bacteria	Firmicutes	Bacilli	Erysipelotrichales	Erysipelotrichaceae	Erysipelotrichaceae	Faecalitalea_sp.	0	0	0	0	0	0	0	0	0	0	0	0	0	0	0	0	0	0	0	0	0	0	0	0	0	0	0	0	0	0	0	0	0	5.69184e-05	0	0	0	0	0	0	0	0
285	Bacteria	Firmicutes	Bacilli	Erysipelotrichales	Erysipelotrichaceae	Erysipelotrichaceae_UCG-006	uncultured_bacterium	0	0	0	0	0	0	0	0	0	0	0	0	0	0	0	0	0	0	0	0	0	0	0	0	0	0	0	0	0	0	0	0	0	0	0	0	0	0	0	0	0	0
286	Bacteria	Firmicutes	Bacilli	Erysipelotrichales	Erysipelotrichaceae	Faecalicoccus	Faecalicoccus_pleomorphus	0	0	0	0	2.7702e-05	0	0	0	0	0	0	0	0	0	0	0	0	0	0	0	0	0	0	0	0	0	0	0	0	0	0	0	0	0	0	0	0	0	0	0	0	0
287	Bacteria	Firmicutes	Bacilli	Erysipelotrichales	Erysipelotrichaceae	Faecalitalea	unidentified	0	0	0	0.000242049	0	0	0	0	0	6.47291e-05	0	0	0	0	0	0	0	0	0	0.0013094	0	0	0	0	0	0	0	0	0	0	0	0	0	0	0	0	0	0	0	0	0	0
288	Bacteria	Firmicutes	Bacilli	Erysipelotrichales	Erysipelotrichaceae	Faecalitalea	Absiella_argi	0	0.000375385	0	0	0	0	0	0	0	0	0	0	0	0.000866152	0	0	0	0	0	0	0	0	0	0	0	0	0	0	7.43974e-05	0	0	0	0	0	0	0	0	0	0	0	0	0
289	Bacteria	Firmicutes	Bacilli	Erysipelotrichales	Erysipelotrichaceae	Faecalitalea	Absiella_dolichum	0	0	0	0	0	0	0	0	0	0	0	0	0	0	0	0	0	0	0	0	0	0	0	0	0	0	0	0	0	0	0	0	0	0	0	0	0.000239935	0	0	0	0	0
290	Bacteria	Firmicutes	Bacilli	Erysipelotrichales	Erysipelotrichaceae	Faecalitalea	Faecalitalea_cylindroides	0	0	0	0	0	0	0	0	0	0	0	0	0	0	0	0	0	0	0	0	0	0	0	0	0	0	0	0	0	0	0	0	0	0	0	0	0	7.49805e-05	0	0	0	0
291	Bacteria	Firmicutes	Bacilli	Erysipelotrichales	Erysipelotrichaceae	Holdemanella	unidentified	0	0	0	0	0	0	0	0	0	0	0	0	0	0	0	0	0	0	0	0	0.00473529	0	0	0	0	0	0	0	0	0	0	0	0	0	0	0	0	0.00371903	0	0	0	0.00331505
292	Bacteria	Firmicutes	Bacilli	Erysipelotrichales	Erysipelotrichaceae	Holdemanella	Holdemanella_biformis	0	0	0	0	0	0	0	0	0	0	0	0	0	0	0	0	0	0	0	0	0	0	0	0	0	0	0	0	0	0	0	0	0	0	0	0	0	0	0	0	0	0
293	Bacteria	Firmicutes	Bacilli	Erysipelotrichales	Erysipelotrichaceae	Holdemanella	uncultured_bacterium	0.0204696	0	0.00608797	0	0	0	0.000916124	0.00735699	0.013263	0	0.0753212	0	0.00352659	0	0	0	0	0	0	0	0.00230366	0.0044333	0.00182968	0	0	0.00297394	0	0	0	0.0041836	0.00148129	0	0	0	0	0	0	0.00335913	0	0.0117805	0.00292593	0.0153278
294	Bacteria	Firmicutes	Bacilli	Erysipelotrichales	Erysipelotrichaceae	Holdemania	unidentified	0.000488341	0.00225231	0.000228467	0.0016312	0.000304722	0.00203505	0	0.000106623	0.000205474	0	0.000376345	0	0	0.000270673	0	0.000199545	0	0	5.59707e-05	0.00255544	0	0.000179123	0.000307386	0	0	0.000371742	0	0	7.43974e-05	0.000504406	0.000630338	0.00113526	0.00162013	0.00122944	0	0.000322975	0.000145415	0.00151461	0.00121236	0.000329678	0	0.000273406
295	Bacteria	Firmicutes	Bacilli	Erysipelotrichales	Erysipelotrichaceae	Holdemania	Holdemania_filiformis	0	0	0	0	0	0	0	0	0	0	0	0	0	0	0	0	0	0	0	0	0	0	0	0	0	0	0	0	0	0	0	0	0	0	0	0	0	0	2.78703e-05	0	0	0
296	Bacteria	Firmicutes	Bacilli	Erysipelotrichales	Erysipelotrichaceae	Holdemania	Holdemania_massiliensis	0	0	0	0	0	0	0	0	0	0.000539409	0	0	0.000221798	0	0	0	0.000294161	0	0	0	0.000170641	0	0	0	0	0	0	0	0	0	0	0	0	0	0	0	0	0	0	0	0	0
297	Bacteria	Firmicutes	Bacilli	Erysipelotrichales	Erysipelotrichaceae	Holdemania	uncultured_bacterium	0	0	0	0	0	0	0	0	0	0	0	0	0	0	0	0	0	0	0	0.00238648	0	0	0	0	0	0	0	0	0	0	0	0	0	0	0	0	0	0	0	0	0	0
298	Bacteria	Firmicutes	Bacilli	Erysipelotrichales	Erysipelotrichaceae	Merdibacter	unidentified	0	0	0	0	0	0	0	0	0	0	0	0	0	0	0	0	0	0	0	0	0	0	0	0	0	0	0	0	0	0	6.30338e-05	0	0	0	0	0	0	0	0	0	0	0
299	Bacteria	Firmicutes	Bacilli	Erysipelotrichales	Erysipelotrichaceae	Merdibacter	Eubacterium_sp.	0	0	0	0	0	0	0	0	0	0	0	0	0	0.000175937	0	0	0	0	0	0	0	0	0	0	0	0	0	0	0	0	0	0	0	0	0	0	0	0	0	0	0	0
300	Bacteria	Firmicutes	Bacilli	Erysipelotrichales	Erysipelotrichaceae	Merdibacter	uncultured_bacterium	0	0	0	0	5.5404e-05	0	0	0	0	0	0	0	0	0	0	0	0	0	0	0.000211193	0.000511924	0	0	0	0	0	0	0	0	0	0	0	0	6.83021e-05	0	0	0	0	0	0	0	6.83515e-05
301	Bacteria	Firmicutes	Bacilli	Erysipelotrichales	Erysipelotrichaceae	Solobacterium	unidentified	0	0	0	0	0	0	0	0	0	0	0	0	0	0	0	0	0	0	0	0	0	0	0	0	0	0	0	0	0	0	0	0	0	0	0	0	0	0	0	0	0	3.41758e-05
302	Bacteria	Firmicutes	Bacilli	Erysipelotrichales	Erysipelotrichaceae	Solobacterium	metagenome	0	0	0	0	0	0	0	0	0	0	0	0	0	0	0	0	0	0	0	0	0	0	0	0	0	0	0	0	0	0	0	0	0	0	0	0	0	0	0	0	0	0
303	Bacteria	Firmicutes	Bacilli	Erysipelotrichales	Erysipelotrichaceae	Solobacterium	uncultured_bacterium	0	0	0	0	0	0	0	0	0	0	0	0	0	0	0	0	0	0	0	0	0.00422337	0	0	0	0	0	0	0.00263302	0	0	0	0	0	0	0	0	0	0	0	0	0.00238042	0
304	Bacteria	Firmicutes	Bacilli	Erysipelotrichales	Erysipelotrichaceae	Turicibacter	unidentified	0	0	0	0.000115763	0	0	6.7861e-05	8.88526e-05	5.30254e-05	0.000129458	0	0	0.000243978	0	0	0	0	8.11655e-05	0	4.22386e-05	0	5.97077e-05	0	0	0	0	0	0	8.67969e-05	0	0	0	0	0.000631795	0	0	0.00018904	0.000389899	0.000125416	0	0	0
305	Bacteria	Firmicutes	Bacilli	Erysipelotrichales	Erysipelotrichaceae	Clostridium_innocuum_group	unidentified	0	0	0	0.000168382	0	0.00062182	0	0	0	0	3.13621e-05	0	6.65395e-05	0	0	0	0	0.00104162	0	0	0	0	0	0	0	0	0	0	0	0	0	0.00010017	0	0	0	0	0	0	0.0005156	0	0	0
306	Bacteria	Firmicutes	Bacilli	Erysipelotrichales	Erysipelotrichaceae	Clostridium_innocuum_group	uncultured_bacterium	0	0	0	0	0	0	0	0	0	0	0	0	0	0	0	0	0	0	0	0	0	0	0	0	0	0	0	0	0	0	0	0	0	0	0	0	0	0.000149961	0	0	0	0
307	Bacteria	Firmicutes	Bacilli	Erysipelotrichales	Erysipelotrichaceae	Clostridium_innocuum_group	uncultured_organism	0	0	0	0	0	0	0	0	0	0	0	0	0	0	0	0	0	0	0	0	0	0	0	0	0	0	0	0	0	0	0	0	0	0	0	0	0	0	0	0	0	0
308	Bacteria	Firmicutes	Bacilli	Erysipelotrichales	Erysipelotrichaceae	uncultured	Clostridiales_bacterium	0	0	0	0	0	0	0	0	0	0	0	0	0	0	0	0	0	0	0	0	0	0	0	0	0	0	0	0	0	0	0	0	0	0	0	0	0	0	0	0	0	0
309	Bacteria	Firmicutes	Bacilli	Erysipelotrichales	Erysipelotrichaceae	uncultured	uncultured_bacterium	0	0	0	0	0	0	0	0	0	0	0	0	0	0	0	0	0	0	0	0	0	0	0	0	0	0	0	0	0	0	0	0	0	0	0	0	0	0	0	0	0	0
310	Bacteria	Firmicutes	Bacilli	Izemoplasmatales	Izemoplasmatales	Izemoplasmatales	gut_metagenome	0	0	0	0	0	0	0	0.0105912	0	0	0	0	0	0	0	0	0	0	0	0	0.000255962	0.000373173	0	0	0	0	0	0	0	0	0.00144978	0	0	0	0	0	0	0	0	0.00206598	0	0
311	Bacteria	Firmicutes	Bacilli	Izemoplasmatales	Izemoplasmatales	Izemoplasmatales	uncultured_organism	0	0	0	0	0	0	0	8.88526e-05	0	0	0	0	0	0	0	0	0	0	0	0	0	0	0	0	0	0	0	0	0	0	0	0	0	0.0121066	0	0	0	0	0	0	0	0
312	Bacteria	Firmicutes	Bacilli	Lactobacillales	Aerococcaceae	Abiotrophia	uncultured_bacterium	0	0	0	0	0	0	0	0	0	0	0	0	0	0	0	0	0	0	0	0	0	0	0	0	0	0	0	0	0	0	0	0	0	0	0	0	0	0	0	0	0	0
313	Bacteria	Firmicutes	Bacilli	Lactobacillales	Carnobacteriaceae	Granulicatella	unidentified	0	0.000160879	0	0	0	0	0.000508958	0	0	0	0	0	0	0	0	0	0	0	0	0	0	0	0	0	0	0	8.70489e-05	0	8.67969e-05	0	0	0	0	0	0	0	0	0	0	0	0.000694289	0
314	Bacteria	Firmicutes	Bacilli	Lactobacillales	Enterococcaceae	Enterococcus	unidentified	0	0	0	0	0	0.000282646	0	0	0.00172995	0.00047468	0	0	0	0	0	0	0	0.000189386	0	0	0	0	0	0	0	0	0	0	0	0	0	0	0	0	0	0	0.000174498	0.000134965	0	0	0	0.000546812
315	Bacteria	Firmicutes	Bacilli	Lactobacillales	Lactobacillaceae	Lactobacillus	unidentified	0	0	0	0	0	0	0	0	0	0	5.22701e-05	0.00106496	6.65395e-05	0	0	0.000119727	0	0	0	0	0	0	0	0	0	0	0.000174098	0	0.000223192	0.000919799	0	0.00013356	0	0	0	0	0	0.000299922	0	0	0.00319869	0.000119615
316	Bacteria	Firmicutes	Bacilli	Lactobacillales	Lactobacillaceae	Lactobacillus	Lactobacillus_brevis	0	0	0	0	0	0	0	0	0	0	0	0	0	0	0	0	0	0	0	0	0	0	0	0	0	0	0	0	0	0	0	0	0	0	0	0	0	0	0	0	0.000545513	0
317	Bacteria	Firmicutes	Bacilli	Lactobacillales	Lactobacillaceae	Lactobacillus	Lactobacillus_curvatus	0	0	0	0	0	0	0	0	0	0	0	0	0	0	0	0	0	0	0	0	0	0	0	0	0	0	0	0	0	0	0	0	0	0	0	0	0	0	0	0	0	0
318	Bacteria	Firmicutes	Bacilli	Lactobacillales	Lactobacillaceae	Lactobacillus	Lactobacillus_delbrueckii	0	0	0	0	0	0	0	0	0	0	0	0	0	0	0	0	0	0	0	0	0	0	0	0	0	0	0	0	0	0	0	0	0	0	0	0	0	0	0	0	0	0
319	Bacteria	Firmicutes	Bacilli	Lactobacillales	Lactobacillaceae	Lactobacillus	Lactobacillus_fermentum	0	0	0	0	0	0	0	0	0	0	0	0	0	0	0	0	0	0	0	0	0	0	0	0	0	0	0	0	0	0	0	0	0	0	0	0	0	0	0	0	0	0
320	Bacteria	Firmicutes	Bacilli	Lactobacillales	Lactobacillaceae	Lactobacillus	Lactobacillus_gasseri	0	0	0	0	0	0	0	0	0	0	0	0	0	0	0	0	0	0	0	0	0	0	0	0	0	0	0	0	0	0	0	0	0	0	0	0	0	0	0	0	0	0.000222142
321	Bacteria	Firmicutes	Bacilli	Lactobacillales	Lactobacillaceae	Lactobacillus	Lactobacillus_helveticus	0	0	0	0	0	0	0	0	0	0	0	0	0	0	0	0	0	0	0	0	0	0	0	0	0	0	0	0	0	0	0	0	0	0	0	0	0	0	0	0	0	0
322	Bacteria	Firmicutes	Bacilli	Lactobacillales	Lactobacillaceae	Lactobacillus	Lactobacillus_iners	0	0	0	0	0	0	0	0	0	0	0	0	0	0	0	0	0	0	0	0	0	0	0	0	2.84353e-05	0	0	0	0	0	0	0	0	0	0	0	0	0	0	0	0	0
323	Bacteria	Firmicutes	Bacilli	Lactobacillales	Lactobacillaceae	Lactobacillus	Lactobacillus_mucosae	0	0	0	0	0	0	0	0	0	0	0	0	0	0	0	0	0	0	0	0	0	0	0	0	0	0	0	0	0	0	0	0	0	0	0	0	0	0	0	0	0.00406655	0
324	Bacteria	Firmicutes	Bacilli	Lactobacillales	Lactobacillaceae	Lactobacillus	Lactobacillus_murinus	0	0	0	0	0	0	0	0	0	0	0	0	0	0	0	0	0	0	0	0	0	0	0	0	0	0	0	0	0	0	0	0	0	0	0	0	0	0	0	0	0	0
325	Bacteria	Firmicutes	Bacilli	Lactobacillales	Lactobacillaceae	Lactobacillus	Lactobacillus_pontis	0	0	0	0	0	0	0	0	0	0	0	0	0	0	0	0	0	0	0	0	0	0	0	0	0	0	0	0	0	0	0	0	0	0	0	0	0	0	0	0	0	0
326	Bacteria	Firmicutes	Bacilli	Lactobacillales	Lactobacillaceae	Lactobacillus	Lactobacillus_ruminis	0	0	0	0.00203111	0	0	0.000152687	0	0	0	0	0	0.00459123	0.00125863	0	0.00383126	0	0	0	0	0	0.000686639	0	0	0.00479136	0	0	0	0	0.000771445	0	0	0	0	0	0.00131497	0	0.00881771	0	0	0	0
327	Bacteria	Firmicutes	Bacilli	Lactobacillales	Lactobacillaceae	Lactobacillus	Lactobacillus_sakei	0	0	0	0	0	0	0.000118757	0	8.61663e-05	0	0	0	0	0	0.00019823	0.00026606	0	0	0	0	0.000554584	0	0	0	0	0	0	0	0	0.000741774	0	0	0	0.000341511	0	0	0	0.000119969	0	0	0.00686851	0
328	Bacteria	Firmicutes	Bacilli	Lactobacillales	Lactobacillaceae	Lactobacillus	Lactobacillus_salivarius	0	0	0	0	0	0.00189373	0	0	0	0	0	0	0	0	0	0	0	0	0	0	0	0	0	0	0	0	0	0	0	0	0	0	0	0	0	0	0	0	0	0	0.00766198	0.000256318
329	Bacteria	Firmicutes	Bacilli	Lactobacillales	Lactobacillaceae	Pediococcus	unidentified	0	0	0	0	0	0	0	0	0	0	0	0	0	0	0	0	0	0	0	0	0	0	0	0	0	0	0	0	0	0.00032638	0	0	0	0	0	0	0	0	0	0	0	0
330	Bacteria	Firmicutes	Bacilli	Lactobacillales	Lactobacillaceae	Pediococcus	Pediococcus_acidilactici	0	0	0	0	0	0	0	0	0	0	0	0	0	0	0	0	0	0	0	0	0	0	0	0	0	0	0.000174098	0	0	0	0	0	0	0	0	0	0	0	0	0	0	0
331	Bacteria	Firmicutes	Bacilli	Lactobacillales	Leuconostocaceae	Leuconostoc	unidentified	0	0	0	0	0	0	0	0	0	0	0	0	0	0	0	0	0	0	0	0	0	0	0	0	0	0	0	0	0	0	0	0	0	0	0	0	0	0	0	0	0	0
332	Bacteria	Firmicutes	Bacilli	Lactobacillales	Leuconostocaceae	Leuconostoc	Leuconostoc_lactis	0	0	0	0.00164173	0	0	0.00111971	0	3.97691e-05	0.000151035	0	0	0	0	0	0.000305969	0	0	0	0	0	0	0	0	0	0	0.000417835	0	0	0.000178026	0	0	0	0	0	0	2.18123e-05	0.000254934	0	0	0.00198368	6.83515e-05
333	Bacteria	Firmicutes	Bacilli	Lactobacillales	Leuconostocaceae	Leuconostoc	Leuconostoc_mesenteroides	0	0	0	0	0	0	0	0	0	0	0	0	0	0	0	0	0	0	0	0	0	0	0	0	0	0	0	0	0	0	0	0.00010017	0	0	0	0	0	0	0	0	0	0
334	Bacteria	Firmicutes	Bacilli	Lactobacillales	Leuconostocaceae	Weissella	unidentified	0	0	0	0.000263097	0	0	0	0.000159935	0	0	0	0	4.43597e-05	0	0	9.3121e-05	0	0	0	0	0	0.000567223	0	0.000471476	0	0	0	0.000219419	0	0.00192861	0	0	0	0.00036997	0	0	0	8.99766e-05	4.18054e-05	0	0.000644697	0.000444285
335	Bacteria	Firmicutes	Bacilli	Lactobacillales	Leuconostocaceae	Weissella	Weissella_koreensis	0	0	0	0	0	0	0	0	0	0	0	0	0	0	0	0	0	0	0	0	0	0	0	0	0	0	0	0	0	0	0	0	0	0	0	0	0	0	0	0	0	0
336	Bacteria	Firmicutes	Bacilli	Lactobacillales	Leuconostocaceae	Weissella	Weissella_viridescens	0	0	0	0.000105239	0	0	0	0	0	0	0	0	0	0	0	0	0	0	0	0	0	0	0	0	0	3.98295e-05	0	0	0	0	0	0	0	0	0	0	0	0	0	0	0	0
337	Bacteria	Firmicutes	Bacilli	Lactobacillales	Leuconostocaceae	Weissella	uncultured_Bacilli	0	0	0	0	0	0	0	0	0	0	0	0	0	0	0	0	0	0	0	0	0	0	0	0	0	0	0	0	0	0	0	0	0	0	0	0	0	0	0	0	0	0
338	Bacteria	Firmicutes	Bacilli	Lactobacillales	Streptococcaceae	Lactococcus	unidentified	0	0	0	0	0	0	0	0	0	0	0	0	0	0	0	0	0	0	0	0	0	0	0	0	0	0	0	0	0	0	0	0	0	0	0	0	0	0	0	0	0	0
339	Bacteria	Firmicutes	Bacilli	Lactobacillales	Streptococcaceae	Lactococcus	Lactococcus_garvieae	0	0	0	0	0	0	0	0	0	0	0	0	0	0	0	0	0	0	0	0	0	0	0	0	0	0	0	0	0	0	0	0	0	0	0	0	0	0	0	0	0	0
340	Bacteria	Firmicutes	Bacilli	Lactobacillales	Streptococcaceae	Lactococcus	Lactococcus_lactis	0	0	0	0.00032624	0	0	0.000491992	0	1.32564e-05	0	4.18161e-05	0	0	0	0	0	0	0	0	0	0	0	0	0	0	0	0	0	0	0.00614189	0	0	0	0.000267517	0	0	5.81662e-05	0	0	0	0	0
341	Bacteria	Firmicutes	Bacilli	Lactobacillales	Streptococcaceae	Lactococcus	Lactococcus_taiwanensis	0	0	0	0	0	0	0	0	0	0	0	0	0	0	0	0	0	0	0	0	0	0	0	0	0	0	0	0	0	0	0	0	0	0	0	0	3.63539e-05	0	0	0	0	0
342	Bacteria	Firmicutes	Bacilli	Lactobacillales	Streptococcaceae	Streptococcus	unidentified	0.000691816	0.0022255	0.00766036	0.000357812	0.000193914	0.000423968	0.00271444	0.000266558	0.0035991	0.00122985	0.000439069	0	0	0.000649614	0	0.0022083	0	9.46931e-05	0	0.000443506	0.000895866	0.00058215	0.000117099	0.000808244	0.000483401	0	0.0024896	0	0.00126476	0.000652761	0.00040972	0.000400681	0.000275116	0.00137743	0	0.000138418	0.000385351	0.00122968	0.000125416	0.000461549	0.0105879	0.00304164
343	Bacteria	Firmicutes	Bacilli	Lactobacillales	Streptococcaceae	Streptococcus	Streptococcus_gordonii	0	0	0	0	0	0	0	0	5.30254e-05	0	0	0	0	0	0	0	0	0	0	0	0	0	0	0	0	0	0.000174098	0	0	0	0	0	0	0	0	0	0	0	0	0	0	0
344	Bacteria	Firmicutes	Bacilli	Lactobacillales	Streptococcaceae	Streptococcus	Streptococcus_mutans	0	0	0	0	0	0	0	0	0	0	0	0	0	0	0	0	0	0	0	0	0	0	0	0	0	0	0	0	0	0	0	0	0	0	0	0	0	0	0	0	0	0.00032467
345	Bacteria	Firmicutes	Bacilli	Lactobacillales	Streptococcaceae	Streptococcus	Streptococcus_salivarius	0.00203475	0.00372704	0.00100794	0.00125234	0.00027702	0.00291125	0.00475027	0.000728591	0.00397691	0.00254601	0.000407707	0.000819202	0.000133079	0	0.000540628	0.015631	0.000196107	0.00154215	0.00012127	0	0.000383943	0.000447808	0	0	0	0.000703655	0.00416094	0.0012068	0.000235592	0.00424295	0	0	0.00108518	0.000557801	0	0.000991995	0.000683452	0.00412393	0.000473795	0.000197807	0.031243	0.00181132
346	Bacteria	Firmicutes	Bacilli	Lactobacillales	Streptococcaceae	Streptococcus	Streptococcus_sobrinus	0	0	0	0	0	0	0	0	0	0	0	0	0	0	0	0	0	0	0	0	0	0	0	0	0	0	0	0	0	0	0	0	0	0	0	0	0	0	0	0	0.000247961	0
347	Bacteria	Firmicutes	Bacilli	Lactobacillales	Streptococcaceae	Streptococcus	Streptococcus_vestibularis	0	0	0	0	0	0	0	0	0	0	0	0	0	0	0	0	0	0	0	0	0	0	0	0	0	0	0	0	0	0	0	0	0	0	0	0	0	0	0	0	0	0
348	Bacteria	Firmicutes	Bacilli	Mycoplasmatales	Mycoplasmataceae	Mycoplasma	Metamycoplasma_hominis	0	0	0	0	0	0	0	0	0	0	0	0	0	0	0	0	0	0	0	0.000105597	0	0	0	0	0	0	0	0	0	0	0	0	0	0	0	0	0	0	0	0	0	0
349	Bacteria	Firmicutes	Bacilli	RF39	RF39	RF39	unidentified	0	0	0	0	0	0	0	0	0	0	0	0	0	0	0	6.6515e-05	0	0	0.00230413	0	0	0.000283612	0	0	0	0	0.000243737	0	0	0	0.000157585	0	0	0	0	0	0	0	0	0.000219785	0	0
350	Bacteria	Firmicutes	Bacilli	RF39	RF39	RF39	gut_metagenome	0	0	0	0	0.00128814	0	0	0.00211469	0	0	0	0	0.000177439	0	0.000450524	0	0	0	0	0	0	0.000164196	0	0	0	0.00280134	0	0.00082282	0	0	0.00226922	0	0.00453941	0.00064887	0	0.000369114	0	0	0	0.00131871	0	0
351	Bacteria	Firmicutes	Bacilli	RF39	RF39	RF39	human_gut	0	0	0	0	0	0	0.000899159	0	0.00423541	0	0	0	0	0	0	0	0	0	0.000317167	0	0	0.000522443	0	0	0	0	0	0.000658256	0	0	0	0	0	0	0	0	0	0	0	0	0	0
352	Bacteria	Firmicutes	Bacilli	RF39	RF39	RF39	metagenome	0	0	0	0	0	0	0	0	0	0	0	0.00212993	0	0	0	0	0	0	0	0	0	5.97077e-05	0	0	0	0	0	0	0	0	0	0	0	0	0	0.000438323	0	0	0	0.000483527	0	0
353	Bacteria	Firmicutes	Bacilli	RF39	RF39	RF39	uncultured_bacterium	0	0	0	0	0	0	0.000152687	0.000852985	5.96536e-05	0.00135931	0	0.00221185	0	0	0	0	0.00220621	0	5.59707e-05	0	0.000298622	0.00147777	0.000936796	0	0	0.000557613	0.000574523	0	0	0	0.000252135	0	0.000336253	0.000301668	0	0	0	0	0	0.00694521	0	0
354	Bacteria	Firmicutes	Bacilli	RF39	RF39	RF39	uncultured_organism	0	0	0	0	0	0	0	0	0	0	0	0	0	0	0	0	0	0	0	0	0	0	0	0	0	0	0	0	0	0	0	0	0	0	0	0	0	0	0	0	0	0
355	Bacteria	Firmicutes	Bacilli	RF39	RF39	RF39	unidentified_rumen	0	0	0	0	0	0	0	0	0	0	0	0	0	0	0	0	0	0	0	0	0	0	0	0	0	0	0	0	0	0	0	0	0	0	0	0	0	0	0	0	0	0
356	Bacteria	Firmicutes	Bacilli	Staphylococcales	Gemellaceae	Gemella	unidentified	0	0	0	0	0	0	0.000101792	0	0	0	0	0	0	0	0	0	0	4.05828e-05	0	0	0	7.46347e-05	0	0	0	0	0	0	0.000161194	0	0	0	0	0	0	0	0	0	0	0	0.00012398	0
357	Bacteria	Firmicutes	Bacilli	Staphylococcales	Gemellaceae	Gemella	Gemella_morbillorum	0	0	0	0	0	0	0	0	0	0	0	0	0	0	0	0	0	0	0	0	0	0	0	0	0	0	0	0	0	0	0	0	0	0	0	0	0	0	0	0	0	0
358	Bacteria	Firmicutes	Bacilli	Staphylococcales	Gemellaceae	Gemella	uncultured_organism	0	0	0	0	0	0	0	0	0	0	0	0	0	0	0	0	0	0	0	0	0	0	0	0	0	0	0	0	0	0	0	0	0	0	0	0	0	0	0	0	0	0
359	Bacteria	Firmicutes	Clostridia	unidentified	unidentified	unidentified	unidentified	0	0	0	2.10478e-05	0.000166212	0	0	0	0	0.000302069	0	0	0.000133079	0	0.000144168	0	9.80536e-05	0	0	0	0	0	0	0	0	0	0	0	0	0	9.45507e-05	0	0	6.83021e-05	0	0	0	0	0	4.3957e-05	0	0
360	Bacteria	Firmicutes	Clostridia	Caldicoprobacterales	Caldicoprobacteraceae	Caldicoprobacter	uncultured_bacterium	0	0	0	0	0	0	0	0	0	0	0	0	0	0	0	0	0	0	0	0	0	0	0	0	0	0	0	0	0	0	0	0	0	0	0	0	0	0	0	0	0	0
361	Bacteria	Firmicutes	Clostridia	Christensenellales	Christensenellaceae	unidentified	unidentified	0	0	0	0	8.31059e-05	0	0	0	0	0	0	0	8.87193e-05	0	0	0	0	0	0	0	0	0	0	0	0	0	0	0	0	0	0	0	0	0	0	0	0	0	0	0	0	0
362	Bacteria	Firmicutes	Clostridia	Christensenellales	Christensenellaceae	Catabacter	Catabacter_hongkongensis	0	0	0	0	0	0	0	0	0	0	0	0	0	0	0	0	0	0	0	0	0	0	0	0	0	2.6553e-05	0	0	0	0	0	0	0	3.41511e-05	0	0	0	0	0	0	0	0
363	Bacteria	Firmicutes	Clostridia	Christensenellales	Christensenellaceae	Christensenella	Christensenella_massiliensis	0	0	0	0	0	0	0	0	0	0	0	0	0	0	0	0	0	0	0	0	0	0	0	0	0	0	0	0	0	0	0	0	0	0	0	0	0	0	0	0	0	0
364	Bacteria	Firmicutes	Clostridia	Christensenellales	Christensenellaceae	Christensenella	Christensenella_minuta	0	0	0	0	0	0	0	0	0	0	0	0	0.000133079	0.000108269	0	0	0	0	0	0	0	0	0	0	0	0	0	0	0	0	0	0	0	0	0	0	0	7.49805e-05	0	0	0	0
365	Bacteria	Firmicutes	Clostridia	Christensenellales	Christensenellaceae	Christensenellaceae	Christensenella_sp.	0	0	0	0	0	0	0	0	0	0	4.18161e-05	0	0	0	0	0	0	0	0	0	0	0	0	0	0	0	0	0	0	0	9.45507e-05	0	0	0	0	0	0	0	0	0	0	0
366	Bacteria	Firmicutes	Clostridia	Christensenellales	Christensenellaceae	Christensenellaceae_R-7_group	unidentified	0.0176617	0	0	0.000673528	0.00328268	0	0.000525923	0.0518899	0	0.0212311	0.00262396	0	0.0158142	0.00464204	0.0189761	0.000345878	0.00259842	0	0.0479762	0	0.00157843	0.000492589	0.00146374	0.000606183	0	0	0.0355856	0.00148108	0	0.0085749	0.00318321	0	0.0155135	0.000774091	0.0002603	0.000599811	0	0.000164957	0	0.00386822	0	0.00416944
367	Bacteria	Firmicutes	Clostridia	Christensenellales	Christensenellaceae	Christensenellaceae_R-7_group	bacterium_YE57	0.000122085	0	0	0	0	0	0	0.000675279	0	0	0	0	0.000665395	0	0	0	0	0	0	0	0	8.95616e-05	0	0	0.000113741	0	0	0.00455293	0	0	0.00141826	0	0	0.000620411	0	0	0	0.00101973	0	0.000681334	0	0.000529724
368	Bacteria	Firmicutes	Clostridia	Christensenellales	Christensenellaceae	Christensenellaceae_R-7_group	gut_metagenome	0	0	0	0	0	0	0	0	0	0	0	0	2.21798e-05	0	0	0	0	0	0	0	0	0	0	0	0	0	0	0	0	0	0.00488512	0	0	0.000478115	0	0	0	0	0	0	0	0
369	Bacteria	Firmicutes	Clostridia	Christensenellales	Christensenellaceae	Christensenellaceae_R-7_group	human_gut	0	0	0	0	0.00127429	0	0.000797367	0.000621968	0	0	0	0	0.0152819	0	0.00971329	0	0	0	0	0	0.000767885	0.00179123	0.00152229	0	0	0	0	0	0	0	0.000283652	0	0	0.00600489	0	0.00143032	0	0.00242937	0	0.00246159	0	0.00278532
370	Bacteria	Firmicutes	Clostridia	Christensenellales	Christensenellaceae	Christensenellaceae_R-7_group	metagenome	0	0	0	0	0	0	0	0.000159935	0	8.63055e-05	0	0	0.00102027	0	0	0.000159636	0	0	0	0	0	0	0	0	0.0002417	0	0.000139278	0	0	0	0	0	0	0	0	9.22786e-05	0	0	0	0	0	0
371	Bacteria	Firmicutes	Clostridia	Christensenellales	Christensenellaceae	Christensenellaceae_R-7_group	uncultured_Clostridium	0	8.04397e-05	0	0	0	0	0	0	0	0	0	0	4.43597e-05	0	0	0	0	0	0	0	0	0	0	0	0	0	0	0	0	0	0	0	0	0	0	0	0	0	0	0	0	0
372	Bacteria	Firmicutes	Clostridia	Christensenellales	Christensenellaceae	Christensenellaceae_R-7_group	uncultured_Firmicutes	0	0	0.00034942	0	0	0	0	0.000231017	0	0	0	0	0	0	0	0	0	0	0	0	0	0	0	0	0	0.000385019	0	0.000383982	0	0	0.000189101	0	0	0.00015368	0	0	0	0	0	0	0	0
373	Bacteria	Firmicutes	Clostridia	Christensenellales	Christensenellaceae	Christensenellaceae_R-7_group	uncultured_bacterium	0	0	0	0	0	0	0	0.000142164	0	0	0	0	0.000554496	9.47354e-05	0	0	0	0	0	0	0	0	2.92749e-05	0	0	0	0	0.0024136	0	0	0.000945507	0	0	0.00036997	0	0	0	0.000254934	0	0	0	0
374	Bacteria	Firmicutes	Clostridia	Christensenellales	Christensenellaceae	Christensenellaceae_R-7_group	uncultured_marine	0	0	0	6.31433e-05	0.000124659	0	0	0	0	0	0	0	0.000288338	0	0	0	0	0	0	0.000105597	0	7.46347e-05	0.000102462	0	2.84353e-05	0.000106212	8.70489e-05	0	0	0	0	0	0	3.41511e-05	4.73272e-05	0	0	7.49805e-05	0	0	0	0
375	Bacteria	Firmicutes	Clostridia	Christensenellales	Christensenellaceae	Christensenellaceae_R-7_group	uncultured_organism	0	0	0	0	0	0	0	0.000995149	0	0	0	0	0.00164131	0	0.000252293	0	0	0	0	0	0	0	0	0	0	0	0.000992357	0	0	0	0.00040972	0	0	0	0	0	0	0	0	0.00127475	0	0
376	Bacteria	Firmicutes	Clostridia	Christensenellales	Christensenellaceae	Christensenellaceae_R-7_group	uncultured_prokaryote	0.00118016	0.000643518	0	0	0.000747954	0	0.000220548	0.000852985	0.00153111	0.00185557	0.000334529	0.000245761	0.00467994	0.000852619	0.000828963	0.00412393	0.000367701	0	0.00163248	0.000506864	0.000597244	0.000328393	0.00317632	0.000336768	0	0.000438125	0	0	0	0.000267039	0.00315169	0	0.000855916	0	0.000638917	0.00265301	0	0.0019045	0	0	0	0.000991097
377	Bacteria	Firmicutes	Clostridia	Christensenellales	Christensenellaceae	Christensenellaceae_R-7_group	uncultured_soil	0	0	0	0	0	0	0	0	0	0	0	0	0	0	0	0	0	0	0	0	0	0	0	0	0	0	0	0	0	0	0	0	0	2.27674e-05	0	0	0	0	0	0	0	0
378	Bacteria	Firmicutes	Clostridia	Christensenellales	Christensenellaceae	Christensenellaceae_R-7_group	uncultured_spirochete	0	0	0	0.000168382	0	0	0	0.000426492	0	0	0	0.00393217	0.00838398	0	0.000612712	0	0	0	0	0	0	0.000149269	0.000848971	0	0.000952584	0	0.010411	0.00104224	0	0	0.00412872	0	0	0	0	0.00163794	0	0	0	0.00619794	0	0
379	Bacteria	Firmicutes	Clostridia	Christensenellales	Christensenellaceae	uncultured	unidentified	0	0	0	0	0	0	0	0	2.65127e-05	0	0	0	0	0	0.000126147	0	0	0	0	0	0	0	0	0	0	0	0	0	0	0	0.000283652	0	0	0	0	0	0	0	0	0	0	0
380	Bacteria	Firmicutes	Clostridia	Christensenellales	Christensenellaceae	uncultured	uncultured_bacterium	0.000447646	0.000160879	0.000510691	0.000410431	0.000720252	0	0	5.33115e-05	3.97691e-05	0	0.000229988	0	0.00224016	9.47354e-05	0	0	0.000269647	0	5.59707e-05	0	0.000554584	8.95616e-05	0.00045376	0	0.000412313	0.000225701	0.000974947	0	0	0	0.000220618	0	0.000213979	0.000984689	0	0	0	0.000104973	0.000167222	0.000461549	0	0
381	Bacteria	Firmicutes	Clostridia	Christensenellales	Christensenellaceae	uncultured	uncultured_organism	0	0	0	0	0	0	0	0	0	0	0	0	0	0	0	0	0	0	0	0	0	0	0	0	0	0	3.48195e-05	0	0	0	0	0	0	0	0	0.000346045	0	0	0	0	0	0
382	Bacteria	Firmicutes	Clostridia	Clostridia	Hungateiclostridiaceae	unidentified	unidentified	0	0	0	0	0	0	0	0	0	0	0	0	0	0	0	0.000319272	0	0	0	0	0	0	0	0	0	0	0	0	0	0	0	0	0	0	0	0	0	0	0	0	0	0
383	Bacteria	Firmicutes	Clostridia	Clostridia	Hungateiclostridiaceae	Ruminiclostridium	uncultured_bacterium	0	0	0	0	0	0	0	0.000266558	0	0	0	0	0	0	0	0	0	0	0	0	0	0	0	0	0	0	0	0	0	0	0	0	0	0	0	0	0	0	0	0	0	0
384	Bacteria	Firmicutes	Clostridia	Clostridia	Hungateiclostridiaceae	Ruminiclostridium	uncultured_organism	0	0	0	0	0	0	0	0	0	0	0	0	0	0	0	0	0	0	0	0	0	0	0	0	0	0	0	0	0	0	0	0	0	0	0	0	0	0	0	0	0	0
385	Bacteria	Firmicutes	Clostridia	Clostridia_UCG-014	Clostridia_UCG-014	Clostridia_UCG-014	unidentified	0	0	0	0	0.00322728	0	0.00666735	0.0251808	0.0532044	0.00638661	0	0.07594	0.00175221	0.00102856	0.0131733	0.00123718	0.0155415	0	0.0103452	0	0.00776417	0.0149269	0.0187652	0.00336768	0	0	0.00809554	0	0	0	0.0340383	0	0.00119217	0	0.00899217	0.00117655	0	0.000179953	0	0.0279347	0	0
386	Bacteria	Firmicutes	Clostridia	Clostridia_UCG-014	Clostridia_UCG-014	Clostridia_UCG-014	gut_metagenome	0	0	0	0	0	0	0	0.0215379	0.00106714	0	0	0	0	0	0.00281127	0	0	0	0.00528923	0	0	0.000656785	0	0	0	0	0	0	0	0	0.00419175	0	0	0.00155387	0	0	0	0	0	0	0	0
387	Bacteria	Firmicutes	Clostridia	Clostridia_UCG-014	Clostridia_UCG-014	Clostridia_UCG-014	uncultured_Clostridiales	0	0	0	0	0	0	0	0	0	0	0	0	0	0	0	0	0	0	0	0	0	0	0	0	0	0	0	0	0	0	0	0	0	0	0	0	0	0	0	0	0	0
388	Bacteria	Firmicutes	Clostridia	Clostridia_UCG-014	Clostridia_UCG-014	Clostridia_UCG-014	uncultured_Escherichia	0	0	0	0	0	0	0	0	0	0	0	0	0	0	0	0	0	0	0	0	0	0	0	0	0	0	0	0	0	0	0	0	0	0	0	0	0	0	0	0	0	0
389	Bacteria	Firmicutes	Clostridia	Clostridia_UCG-014	Clostridia_UCG-014	Clostridia_UCG-014	uncultured_Ruminococcaceae	0	0	0	0	0	0	0	0	0.00051037	0.00153192	0	0	0	0	0.00176605	0	0	0	0	0	0	0	0	0	0	0	0	0	0	0	0	0	0	0	0	0	0	0	0	0	0	0
390	Bacteria	Firmicutes	Clostridia	Clostridia_UCG-014	Clostridia_UCG-014	Clostridia_UCG-014	uncultured_bacterium	0	0.019091	0	0	0	0	0	8.88526e-05	0	0	0	0	0	0	3.60419e-05	0	0.00264745	0	0.00602618	0	0	0	0	0	0	0	0.000104459	0	0	0	6.30338e-05	0	0	0	0	0	0	0	0	8.7914e-05	0	0
391	Bacteria	Firmicutes	Clostridia	Clostridia_UCG-014	Clostridia_UCG-014	Clostridia_UCG-014	uncultured_organism	0	0	0	0	0	0	0	0	0	0	0	0	0	0	0	0	0	0	0	0	0	0	0	0	0	0	0	0	0	0	0	0	0	0	0	0	0	0	0	0	0	0
392	Bacteria	Firmicutes	Clostridia	Clostridia_UCG-014	Clostridia_UCG-014	Clostridia_UCG-014	uncultured_rumen	0	0	0	0	0	0	0	0	0	0	0	0	0	0	0	0	0.00151983	0	0	0	0	0	0	0	0	0	0	0	0	0	0	0	0	0	0	0	0	0	0	0	0	0
393	Bacteria	Firmicutes	Clostridia	Clostridia_vadinBB60_group	Clostridia_vadinBB60_group	Clostridia_vadinBB60_group	unidentified	0	0	0	0	0.000803357	0	0.000458062	0	0	0	0	0	0.00521226	0	0	0	0	0	0	0	0.00494859	0	0	0	0	0	8.70489e-05	0	0	0	0	0	0	0	0	0	0	0	0	0	0	0
394	Bacteria	Firmicutes	Clostridia	Clostridia_vadinBB60_group	Clostridia_vadinBB60_group	Clostridia_vadinBB60_group	gut_metagenome	0.000325561	0	0.000161271	0	0.000152361	0	0	0.00111954	0.000914689	0	0.000240442	0.00147456	0.00141951	0.000135336	0.00419888	0	0.000637349	0	4.66422e-05	0.00031679	0.00157843	0.000343319	0.000687959	0	0.00322741	0.000238977	0.000870489	0	0	0	0.00302562	0.000701192	0	0.0017474	0.000283963	0	0	0.00107972	0.00135171	0.00639574	0	0.0018284
395	Bacteria	Firmicutes	Clostridia	Clostridia_vadinBB60_group	Clostridia_vadinBB60_group	Clostridia_vadinBB60_group	metagenome	0	0	0	0	0	0	0	0	0	0	0	0	0	0.00423603	7.20838e-05	0	0	0	0	0	0	0.000806054	0	0	0	0	0	0	0	0	0	0	0	0	0	0	0	0	0	0.00945076	0	0
396	Bacteria	Firmicutes	Clostridia	Clostridia_vadinBB60_group	Clostridia_vadinBB60_group	Clostridia_vadinBB60_group	uncultured_Clostridia	0	0	0	0	0	0	0	0	0	0	0	0	0	0	0	0	0	0	0	0	0	0	0	0	0	0	0	0	0	0	0	0	0	0.000108145	0	0	0	7.49805e-05	0	0	0	0
397	Bacteria	Firmicutes	Clostridia	Clostridia_vadinBB60_group	Clostridia_vadinBB60_group	Clostridia_vadinBB60_group	uncultured_Thermoanaerobacterales	0	0	0	0	0	0	0	0.000390951	0	0	0	0	0	0	0	0	0	0	0	0	0	0	0	0	0	0	0.00139278	0	0	0	0.000126068	0	0.00181882	0	0	0	0	0	0	0	0	0
398	Bacteria	Firmicutes	Clostridia	Clostridia_vadinBB60_group	Clostridia_vadinBB60_group	Clostridia_vadinBB60_group	uncultured_bacterium	0	0	0.000147832	0	9.69569e-05	0	0	0.00115508	0	0	0	0	0.0204942	0	0.000234272	0	0	0	0	0	0.00123715	0.00144791	0	0	0.00341224	0.000716932	0.00127091	0	0	0	0.00267894	0	0	0.0039046	0	0.000299905	0	0.00260932	0	0.000923097	0	0
399	Bacteria	Firmicutes	Clostridia	Clostridia_vadinBB60_group	Clostridia_vadinBB60_group	Clostridia_vadinBB60_group	uncultured_organism	0	0	0	0	4.1553e-05	0	0	0.0166154	0	0	0	0	6.65395e-05	0	0	0	0	0	0	0	0	0	0	0	0	6.63825e-05	0	0	0	0	0.000189101	0	0	0.00429734	0	0	0	0	0	0	0	0.000102527
400	Bacteria	Firmicutes	Clostridia	Clostridia_vadinBB60_group	Clostridia_vadinBB60_group	Clostridia_vadinBB60_group	unidentified	0	0	0	0	0	0	0	0	0	0	0	0	0	0	0	0	0	0	0	0	0	0	0	0	0	0	0	0	0	0	0	0	0	0	0	0	0	0	0	0	0	0
401	Bacteria	Firmicutes	Clostridia	Clostridiales	Clostridiaceae	Clostridium_sensu_stricto_1	unidentified	0	0	0	0.00302035	0	0	0	0	0.0112745	0.000366798	0	0.00294913	6.65395e-05	0	0	0	0	0.000135276	0.00752806	0	0	0.000865762	0	0.00161649	0.000554489	0.00357138	0.000243737	0.00899616	0	0.000534077	0	0	0	0.000819625	0.00134883	0	0	0.000209945	0	0.000373635	0	0.000256318
402	Bacteria	Firmicutes	Clostridia	Clostridiales	Clostridiaceae	Clostridium_sensu_stricto_1	Clostridium_baratii	0	0	0	0	0	0	0	0	0	0	0	0	0	0	0	0	0	0.000554631	0	0	0	0	0	0	0	0	0	0	0	0	0	0	0	0	0	0	0	0	0	0	0	0
403	Bacteria	Firmicutes	Clostridia	Clostridiales	Clostridiaceae	Clostridium_sensu_stricto_1	Clostridium_butyricum	0	0	0	0	0	0	0	0	0	0	0	0	0	0	0	0	0	0	0	0	0	0	0	0	0	0	0	0	0	0	0	0	0	0	0	0	0	0	0	0	0	0
404	Bacteria	Firmicutes	Clostridia	Clostridiales	Clostridiaceae	Clostridium_sensu_stricto_1	Clostridium_paraputrificum	0	0	0	0	0	0	0	0	0	0	0	0	0	0	0	0	0	0	0	0	0	0	0	0	8.5306e-05	0	0	0	0	0	0	0	0	0	0	0	0	0	9.7546e-05	0	0	0
405	Bacteria	Firmicutes	Clostridia	Clostridiales	Clostridiaceae	Clostridium_sensu_stricto_1	Clostridium_perfringens	0	0	0	0	0	0	0	0	0	0	0	0	0	0	0	0	0	0	0	0	0	0	0	0	0	0	0	0	0	0	0	0	0	6.26103e-05	0	0	0	0	0	0	0	0
406	Bacteria	Firmicutes	Clostridia	Clostridiales	Clostridiaceae	Clostridium_sensu_stricto_1	metagenome	0	0	0	0	0	0	0	0	0.000318153	0	0	0	0	0.000351874	0	0	0	0	0	0	0	0	0	0	0	0	0	0.0121777	0	0	0	0	0	6.83021e-05	0.000709908	0	0	0	0	0	0	0
407	Bacteria	Firmicutes	Clostridia	Clostridiales	Clostridiaceae	Clostridium_sensu_stricto_1	uncultured_Firmicutes	0	0	0	0	0	0	0	0	0	0	0	0	0	0	0	0	0	0	0	0	0	0	0	0	0	0	0	0	0	0	0	0	0	0	0	0	0	0	0	0	0	0
408	Bacteria	Firmicutes	Clostridia	Clostridiales	Clostridiaceae	Clostridium_sensu_stricto_1	uncultured_bacterium	0	0	0	0	0	0	0	0	0	0	0	0	2.21798e-05	0	0	0	0	0	0	0	0	0	0	0	0	0	0	0	0	0	0	0	0	0	0	0	0	0	0	0	0	0
409	Bacteria	Firmicutes	Clostridia	Clostridiales	Clostridiaceae	Clostridium_sensu_stricto_3	unidentified	0	0	0	0	0	0	0	0	0	0	0	0	0	0	0	0	0	0	0	0	0	0	0	0	0	0	0	0	0	0	0.000220618	0	0	0	0	0	0	0	0	0	0	0
410	Bacteria	Firmicutes	Clostridia	Eubacteriales	Anaerofustaceae	Anaerofustis	Anaerofustis_sp.	0	0	0	0	0	0	0	0	0	0	0	0	0	0	0	0	0	0	0	0	0	0	0	0	0	0	0	0	0	0	0	0	0	0	0	0	0	0	0	0	0	0
411	Bacteria	Firmicutes	Clostridia	Eubacteriales	Anaerofustaceae	Anaerofustis	Anaerofustis_stercorihominis	0	0	0	0	0	0	0	0	0	0	0	0	0	0	0	0	0	0	0	0	0	0	0	0	0	0	0	0	0	0	0	0	0	0	0	0	0	0	0	0	0	3.41758e-05
412	Bacteria	Firmicutes	Clostridia	Eubacteriales	Eubacteriaceae	Eubacterium	unidentified	0	0	0	0	0	0	0	0	0	0	0	0	0	0	0	0	0	0	0	0	0	0	0	0	0	0	0	0	0	0	0	0	0	0	0	0	0	0	0	0	0	0
413	Bacteria	Firmicutes	Clostridia	Eubacteriales	Eubacteriaceae	Eubacterium	Eubacterium_limosum	0	0	0	0	0	0	0	0	0	0	0	0	0	0	0	0	0	2.70552e-05	0	0.000274551	0	0	0	0	0	0	0	0	0	0	0	0	0	0	0	0	0	0	0	0	0	0
414	Bacteria	Firmicutes	Clostridia	Lachnospirales	unidentified	unidentified	unidentified	0	0	0	0	0	0	0	0	0	0	0	0	0	0	0	0	0	0	0	0	0	0	0	0	0	0	0	0	0	0	0	0	0	0	0	0	0	0	0	0	0	0
415	Bacteria	Firmicutes	Clostridia	Lachnospirales	Defluviitaleaceae	Defluviitaleaceae_UCG-011	uncultured_bacterium	0	0	0	0.000157858	0	0	0	0.000231017	0	0	0	0	0.000665395	0	0.00127949	0.000172939	0	0	0	8.44773e-05	8.53206e-05	0	0	0	7.10884e-05	0.000106212	0.000156688	0	0	0	0.000189101	0	0	0.000591952	0	0	0	0	0	0	0	0
416	Bacteria	Firmicutes	Clostridia	Lachnospirales	Lachnospiraceae	unidentified	unidentified	0.00508688	0.0034321	0.013157	0.0146071	0.00454313	0.0289146	0.00380022	0.00573988	0.0153045	0.0401968	0.0111963	0.0213812	0.000243978	0.00713222	0.00497378	0.0160168	0.0114478	0.022307	0.0128266	0.0312144	0.00746555	0.00601555	0.00611845	0.0148178	0.00308523	0.00318636	0.0113512	0.0129457	0.0132551	0.00284841	0.00488512	0.01566	0.00626653	0.00568046	0.0106959	0.00922786	0.00710354	0.00274429	0.00911359	0.0120222	0.0113566	0.00678389
417	Bacteria	Firmicutes	Clostridia	Lachnospirales	Lachnospiraceae	Agathobacter	unidentified	0.0016685	0	0.002876	0.000999768	0.000734103	0	0.00145901	0	0.00114005	0.0234967	0.0218384	0.0273614	0	0.00572473	0.00434305	0.00171609	0.00245134	0	0.00517729	0.00352693	0.0082761	0.00211962	0.0244445	0.0389304	0.000227483	0.00504507	0.000330786	0	0	0.00388689	0.000346686	0.0116198	0.0100264	0.00897035	0.000733572	0.00941242	0.00151232	0.0273829	0.0181296	0.00043957	0.000991842	0
418	Bacteria	Firmicutes	Clostridia	Lachnospirales	Lachnospiraceae	Agathobacter	Eubacterium_ramulus	0	0	0.00307758	0	0.00027702	0	0	0	0.000384434	0.000453104	7.31781e-05	0	0.000665395	0.000906753	0.00162188	0.000372484	0	0	0.000102613	0	0	0.000432881	0.000146374	0.000538829	0	0	0.00118386	0	0	0	0	0	0.000825347	0	0.00101753	0.000484463	0.00056712	0.00124468	0	0.000263742	0.000471125	0.00032467
419	Bacteria	Firmicutes	Clostridia	Lachnospirales	Lachnospiraceae	Agathobacter	uncultured_bacterium	0	0	0	0	0	0	0	0	0	0.000345222	0	0	0	0	1.80209e-05	0	0	0	3.73138e-05	0	0	0	0	0	0	0	0	0	0	0	0	0	0	0	0	0	0	0	0	0	0	0
420	Bacteria	Firmicutes	Clostridia	Lachnospirales	Lachnospiraceae	Anaerostignum	unidentified	0	0	0	0	0	0	0	0	0	0	0	0	0	0	0	0	0	0	0	0	0	0	0	0	0	0	0	0	0	0	0	0	0	0	0	0	0	0	0	0	0	0
421	Bacteria	Firmicutes	Clostridia	Lachnospirales	Lachnospiraceae	Anaerostignum	uncultured_Firmicutes	0	0	0	0	0	0	0	0	0	0	0	0	0	0	0	0	0	0	0	0	0	0	0	0	0	0	0	0	0	0	0	0	0	0	0	0	0	0	0.000264768	0	0	0
422	Bacteria	Firmicutes	Clostridia	Lachnospirales	Lachnospiraceae	Anaerostignum	uncultured_bacterium	0	0	0	0	0	0	0	0	0	0	0	0	0	0	0	0	0	0	0	0	0	0	0	0	0	0	0	0	0	0	0	0	0	0	0	0	0	0	0	0	0	0
423	Bacteria	Firmicutes	Clostridia	Lachnospirales	Lachnospiraceae	Anaerostipes	unidentified	0.00301144	0.00171605	0.00645083	0	0.000443232	0.00641605	0.00305375	0.000781903	0.0118777	0.00375429	0.00200717	0.00983043	0.0116666	0.000203004	0.000540628	0.00449641	0.00580968	0	0.00193099	0.00401267	0.000639904	0.000403027	0.000614772	0.0102378	0.000625578	0.0019782	0.00584968	0.00493692	0.00616258	0.00032638	0	0.00701192	0.00195638	0.00148557	0.000544263	0.000230696	0.000618016	0.000164957	0.00107301	0.000417592	0.00109103	0.000290494
424	Bacteria	Firmicutes	Clostridia	Lachnospirales	Lachnospiraceae	Anaerostipes	Anaerostipes_caccae	0	0	0	5.26194e-05	0	0	0	0	0	0	0	0	0	0	0	0	0	0.000351717	0	0	0	0	0	0	0	0	0	0	0	0	0	0	0	0	0	0	0	0	0	0	0	0
425	Bacteria	Firmicutes	Clostridia	Lachnospirales	Lachnospiraceae	Anaerostipes	uncultured_bacterium	0	0	0	0	0	0	0	0	0	0	0	0	0	0	0	0	0	0	0	0	0	0	0	0	0	0	0	0	0	0	0.00954962	0	0	0	0	0	0	0	0	0	0	0
426	Bacteria	Firmicutes	Clostridia	Lachnospirales	Lachnospiraceae	Blautia	unidentified	0.00264518	0.00345891	0.00244594	0.0119551	0.00286716	0.00876201	0.0012215	0.0016882	0.0055279	0.00854424	0.00791369	0.00630786	0.00281684	0.00388415	0.00173001	0.00591984	0.0040202	0.00258377	0.00395526	0.00530095	0.00345548	0.00162704	0.00106853	0.00525359	0.00416578	0.0033324	0.00546667	0.00142622	0.00900208	0.00222532	0.00245832	0.0117533	0.00559402	0.0154477	0.00163279	0.00415254	0.00128693	0.00338912	0.00519781	0.000901119	0.00317389	0.00153791
427	Bacteria	Firmicutes	Clostridia	Lachnospirales	Lachnospiraceae	Blautia	Blautia_caecimuris	0	0	0	0	0	0	0	0	0	0	0	0	0	0	0	0	0	0	0	0	0	0	0	0	0	0	0	0	0	0	0	0	0	0	0	0	0	0	0	0	0	0
428	Bacteria	Firmicutes	Clostridia	Lachnospirales	Lachnospiraceae	Blautia	Blautia_faecis	0	0	0	0	0	0	0	0	0	0	0	0	0	0	0	0	0	0	0	0	0	0	0	0	0	0	0	0	0	0	0	0	0	0	0	0	0	0	0	0	0	0
429	Bacteria	Firmicutes	Clostridia	Lachnospirales	Lachnospiraceae	Blautia	Blautia_glucerasea	0	0	0	0	0	0	0	0	0	0	0	0	0	0	0	0	0	0	0	0	0	0	0	0	0	0	0	0	0	0	0	0	0	0	0	0	0	0	0	0	0	0
430	Bacteria	Firmicutes	Clostridia	Lachnospirales	Lachnospiraceae	Blautia	Blautia_hydrogenotrophica	0	0	0	0	0	0	0	0	0	0	0	0	0	0	0	0	0	0	0	0	0	0	0	0	0	0	0	0	0	0	0	0	0	0	0	0	0	0	0	0	0	0
431	Bacteria	Firmicutes	Clostridia	Lachnospirales	Lachnospiraceae	Blautia	Blautia_luti	0	0	0	0	0	0	0	0	0	0	0	0	0	0	0	0	0	0	0	0	0	0	0	0	0	0	0	0	0	0	0	0	0	0	0	0	0	0	0	0	0	0
432	Bacteria	Firmicutes	Clostridia	Lachnospirales	Lachnospiraceae	Blautia	Blautia_sp.	0	0.000589891	0	0	0	0.00104579	0	0	0	0	0	0	0	0	0	0	0	0	0	0	0	0	0	0	0	0	0	0	0.000347188	0	0	0	0	8.53777e-05	0	0	0	0.000194949	0.000167222	0	0	0
433	Bacteria	Firmicutes	Clostridia	Lachnospirales	Lachnospiraceae	Blautia	metagenome	0	0	0.000188149	0	0	0	0	0	0.000251871	0.000302069	0.000491339	0.000737282	0.000266158	0.000879686	0.000144168	0	0.000171594	0	0	0	0	0	0	0	0.000127959	0	0	0	8.67969e-05	0	0.000346686	0	0	0	0	0	0	0.00124468	0	0	0.000297553	0
434	Bacteria	Firmicutes	Clostridia	Lachnospirales	Lachnospiraceae	Blautia	uncultured_Blautia	0	0	0	0	0	0	0	0	6.62818e-05	0	0	0	0	0	0	0	0	0	0	0	0	0	0	0	0	0	0	0	0	0	0	0	0	0	0	0	0	0	0	0	0	0
435	Bacteria	Firmicutes	Clostridia	Lachnospirales	Lachnospiraceae	Blautia	uncultured_bacterium	0	0	0	0	0	0	0	0	0	0	0	0	0	0	0	0	0	0.00499168	0	0.00101373	0	0	0	0	0	0	0	0	0	0	0	0	0	0	0	0	0	0	0	0	0	0
436	Bacteria	Firmicutes	Clostridia	Lachnospirales	Lachnospiraceae	Butyrivibrio	Butyrivibrio_crossotus	0	0	0	0	0	0	0	0	0	0	0	0	0.000110899	0	0	0	0	0	0	0	0	0.00574687	0	0	0	0	0	0	0	0	0.0106527	0	0	0	0	0	0	0	0	0	0	0
437	Bacteria	Firmicutes	Clostridia	Lachnospirales	Lachnospiraceae	Butyrivibrio	uncultured_organism	0	0	0	0	0	0	0	0	0	0	0	0	0	0	0	0	0	0	0	0	0	0	0	0	0	0	0	0	0	0	0.00583063	0	0	0	0	0	0	0	0	0	0	0
438	Bacteria	Firmicutes	Clostridia	Lachnospirales	Lachnospiraceae	CAG-56	uncultured_bacterium	0.00317422	0	0.00350764	0	0.000263169	0	0	0	0.00111353	0.00142404	0.00221625	0	0	0	0.000306356	0	0.000833456	0	0.00173509	0	0.000298622	0	0.000292749	0	0	0	0	0.0106967	0	0	0	0.00186985	0	0	0	0.00101506	0	0	0	0.000857162	0	0.00116198
439	Bacteria	Firmicutes	Clostridia	Lachnospirales	Lachnospiraceae	Catenibacillus	Catenibacillus_scindens	0	0	0	0	0	0	0	0	0	0	0	0	0	0	0	0	0	0	0	0	0	0	0	0	0	0	0	0	0	0	0	0	0	0	0	0	0	0	0	0	0	0
440	Bacteria	Firmicutes	Clostridia	Lachnospirales	Lachnospiraceae	Catenibacillus	uncultured_bacterium	0	0	0	0	0	0	0	0	0	0	0	0	0	0	0	0	0	0	0	0	0	0	0	0	0	0	0	0	0	0	0	0	0	0	0	0	0	0	0.000250833	0	0	0
441	Bacteria	Firmicutes	Clostridia	Lachnospirales	Lachnospiraceae	Coprococcus	unidentified	0.000610426	0.00294946	0.0028088	0	0.0104713	0	0.0143865	0.000497574	0.006774	0.00189872	0.00146356	0.00589826	0.00589984	0.00113683	0.00167595	0.000438999	0.000661862	0	0.00155785	0	0.000725225	0.00571702	0.000878246	0.00309827	0.000838843	0.00212424	0.00315117	0.000548546	0	0.00032638	0.00201708	0.00143577	0.000993474	0.000102453	0.000496936	0.00696703	0	0	0	0.0029671	0.00121501	0.00442576
442	Bacteria	Firmicutes	Clostridia	Lachnospirales	Lachnospiraceae	Coprococcus	Coprococcus_comes	0	0	0	0	0	0	0	0	0	0	0	0	0	0	0	0	0	0	0	0	0	0	0	0	0	0	0	0	0	0	0	0	0	0	0	0	0	0	0	0	0	0
443	Bacteria	Firmicutes	Clostridia	Lachnospirales	Lachnospiraceae	Coprococcus	Coprococcus_eutactus	0	0	0	0	0	0	0	0	0	0	0	0	0	0	0	0	0	0	0	0	0	0.00195543	0	0	0	0	0	0	0	0	0	0	0	0	0	0	0	0	0	0	0	0
444	Bacteria	Firmicutes	Clostridia	Lachnospirales	Lachnospiraceae	Coprococcus	Lachnospiraceae_bacterium	0	0	0	0	0	0	0	0	0	0	0	0	0	0	0	0	0	0	0	0	0	0	0	0	0	0	0	0	0	0	0	0	0	0	0	0	0	0	0	0	0	3.41758e-05
445	Bacteria	Firmicutes	Clostridia	Lachnospirales	Lachnospiraceae	Coprococcus	metagenome	0	0	0.000188149	0.000557766	0.000180063	0	0	0.000177705	0.00029164	0.000107882	0.000292713	0	0.00117553	0.00014887	0.000234272	0.000279363	0	0	0.000167912	0	0.000341282	0.000358246	0.000468398	0.000471476	0.00042653	0.00030536	0.000295966	0	0	0.000267039	0	0	0.000259832	0	0.00033129	0.000322975	0	0	0	0	0.00101664	0.000307582
446	Bacteria	Firmicutes	Clostridia	Lachnospirales	Lachnospiraceae	Coprococcus	uncultured_bacterium	0	0	0	0	0	0	0	0	0	0	0	0	0	0	0	0	0	0	0	0	0	0	0	0	0	0	0	0	0	0	0	0	0	0	0	0	0	0	0	0	0	0
447	Bacteria	Firmicutes	Clostridia	Lachnospirales	Lachnospiraceae	Coprococcus	unidentified	0	0	0	0.00165225	0.00342119	0	0.00268051	0	0.000119307	0.00304227	0	0	0	0.0384896	0.000216251	0	0	0	0.00963628	0.0107286	0.000981187	0.016748	0.0244884	0.00255944	0	0.00938649	0	0.00548546	0	0	0.000787923	0	0	0.000637486	0	0	0	0.000119969	0	0.012264	0	0.00639087
448	Bacteria	Firmicutes	Clostridia	Lachnospirales	Lachnospiraceae	Dorea	unidentified	0	0	0	0	0	0	0	0	0	0	0	0	0.000177439	0	0	0	0	0	0	0	0	0	0	0	0	0.000398295	3.48195e-05	0	0	0	0	0	0	0	0	0	0	0	0	0	0	0
449	Bacteria	Firmicutes	Clostridia	Lachnospirales	Lachnospiraceae	Dorea	Dorea_formicigenerans	0.000569731	0	0.000645083	0.000884006	0	0.000141323	0.000203583	0.000284328	0.00156425	0.000215764	0.000334529	0	0.00130861	0.00142103	0.000108126	0.000611938	0	0	0.00017724	0	0	0.000343319	0.000248836	0.00141443	0	0.00057089	0.00186285	0.00153593	0.000495983	0.000385722	0.00119764	0	0.00108518	0	0.00033129	0.000553672	0.000974283	0.000464879	0	0.000373635	0.000867862	0.000751867
450	Bacteria	Firmicutes	Clostridia	Lachnospirales	Lachnospiraceae	Dorea	Dorea_longicatena	0	0	0	0	0	0	0	0	0	0	0	0	0	0	0	0	0	0	0	0	0	0	0	0	0	0	0	0	0	0	0	0	0	0	0	0	0	0	0	0	0	0
451	Bacteria	Firmicutes	Clostridia	Lachnospirales	Lachnospiraceae	Dorea	uncultured_bacterium	0.00158711	0	0.00170678	0	0.000581742	0.00825325	0.000118757	0.00193699	0.000331409	0.000194187	0.001704	0.0077005	0.00578894	0.0017323	5.40628e-05	0.000838089	0.000612835	0	0.000139927	0.00443506	0.000981187	0.00150762	0.000746509	0.00653331	0.00126537	0	0.000940128	0.00197477	0.00117796	0.000534077	0.00217467	0	0.00345423	0	0.000686244	0.00143032	0.00222486	0.00121468	0	0.00059342	0.0031491	0.000529724
452	Bacteria	Firmicutes	Clostridia	Lachnospirales	Lachnospiraceae	Eisenbergiella	unidentified	0	0	0	0	0	0	0	0	0	0	0	0	0	0	0	0	0	0.00121748	0	0	0	0	0	0	0	0	0	0	0	0	0	0	0	0	0	0	0	0	0	0	0	0
453	Bacteria	Firmicutes	Clostridia	Lachnospirales	Lachnospiraceae	Eisenbergiella	uncultured_bacterium	0	0	0	0	0	0	0	0	0	0	0	0	0	0	0	0	0	0	0	0	0	0	0	0	0	0	0	0	0	0	0	0	0	0.00015368	0	0	0	0	0	0	0	0
454	Bacteria	Firmicutes	Clostridia	Lachnospirales	Lachnospiraceae	Eisenbergiella	uncultured_organism	0	0.00882156	0	0	0	0	0	0	0	0	5.22701e-05	0	4.43597e-05	0	0	0	0	0.000202914	0	0.000359029	0	0	0	0	0	0	0.000383015	0	0	0	0	0	0.000366821	0.000301668	0	0	0	0	0.00710692	0	0	6.83515e-05
455	Bacteria	Firmicutes	Clostridia	Lachnospirales	Lachnospiraceae	Epulopiscium	uncultured_organism	0	0	0	0	0	0	0	0	0	0	0	0	0	0	0	0	0	0	0	0	0	0	0	0	0	0	3.48195e-05	0	0	0	0	0	0	0	0	0	0	0	0.000139351	0	0	0
456	Bacteria	Firmicutes	Clostridia	Lachnospirales	Lachnospiraceae	Frisingicoccus	unidentified	0	0	0	0	0	0	0	0	0	0	0	0	0	0	0	0	0	0	0	0	0	0	0	0	0	0	0	0	0	0	0	0	0	0	0	0	0	0	0.00121236	0	0	0
457	Bacteria	Firmicutes	Clostridia	Lachnospirales	Lachnospiraceae	Frisingicoccus	uncultured_bacterium	0	0	0	0	0	0	0	0	0	0	0	0	0	0	0	0	0	0	0	0.00194298	0	0	0	0	0	0	0	0	0	0	0	0	0	0.000256133	0	0	0	0	0	0	0	0
458	Bacteria	Firmicutes	Clostridia	Lachnospirales	Lachnospiraceae	Fusicatenibacter	unidentified	0	0	0	8.4191e-05	0	0	0	0	0	0	0	0	4.43597e-05	0	0	0	0	0	0	0	0	0	0	0	0	0	0	0	0	0	0	0	0	0	0	0	0	0	0	0	0	0
459	Bacteria	Firmicutes	Clostridia	Lachnospirales	Lachnospiraceae	Fusicatenibacter	uncultured_bacterium	0	0	0	0	0	0	0	0	0	0	0	0	0	0	0	0	0	0	0	0	0	0	0	0	0	0	0	0	0	0	0	0	0	0	0	0	0	0	0	0	0	0
460	Bacteria	Firmicutes	Clostridia	Lachnospirales	Lachnospiraceae	Fusicatenibacter	uncultured_organism	0.00305213	0	0.00857423	0.00553556	0.00454313	0.00093273	0.000203583	0.000213246	0.00447402	0.0132695	0.00196536	0.00516097	0.0333585	0.00255786	0	0.00674462	0.000245134	0	0.000401123	0.00183738	0.00132247	0.000403027	0.00162475	0.0045127	0.000909931	0.00229684	0.00840892	0.00329128	0.000793572	0.00130552	0.000882473	0.00731243	0.00386691	0.00271501	0.000757235	0.000807438	0.000334455	0.000899766	0	0.00248357	0.000545513	0.00140121
461	Bacteria	Firmicutes	Clostridia	Lachnospirales	Lachnospiraceae	GCA-900066575	unidentified	0	0	0.000134392	0.00018943	0.000124659	0	0	0	0	0	0.00020908	0	0	6.76682e-05	0.000666775	0	0	0	0.000307839	0.000274551	0	0	0	0	0	5.3106e-05	0.000121868	0	0	0	0.000535787	0	0	0.000204906	0	0.000276836	0	0.000224942	0	0	0	0.000205055
462	Bacteria	Firmicutes	Clostridia	Lachnospirales	Lachnospiraceae	GCA-900066575	uncultured_bacterium	0	0	0	0	0	0	0.000101792	0	0.000245243	0	0	0	0	0	0.0011173	0.000199545	0	0	0.00054105	0	0	0	0	0	0	0	0	0	0	0	0	0	0.000168126	0	0	0	0	0	0	0	0	0
463	Bacteria	Firmicutes	Clostridia	Lachnospirales	Lachnospiraceae	GCA-900066575	uncultured_organism	0	0	0	0	0	0	0	0	0	0	0	0	0	0	0	0	0	0	0	0	0	0	0	0	0	0.000106212	0	0	0	0	0	0	0.000106989	0	0	0	0	0	0	0	0	0
464	Bacteria	Firmicutes	Clostridia	Lachnospirales	Lachnospiraceae	GCA-900066755	uncultured_bacterium	0	0	0	0	0	0	0	0	0	0	0	0	0	0	0	0	0	0	0	0	0	0	0	0	0	0	0	0	0	0	0	0	0	5.69184e-05	0	0	0	0	0	0	0	0
465	Bacteria	Firmicutes	Clostridia	Lachnospirales	Lachnospiraceae	Herbinix	Clostridium_sp.	0	0	0	0	0	0	0	0	0	0	0	0	0	0	0	0	0	0	0	0	0	0	0	0	0	0	0.000121868	0	0	0	0	0	0	0	0	0	0	0	0	0	0	0
466	Bacteria	Firmicutes	Clostridia	Lachnospirales	Lachnospiraceae	Howardella	unidentified	0	0	0	0	0.000263169	0	0.000373236	0	0	0	0.000125448	0	0	0	0.00180209	0	0	0	9.32845e-05	0	0.000255962	0.000208977	0	0	0	0.000225701	0	0.000548546	0	0	0	0	0	0	0	0	0	0	0	0	9.91842e-05	0
467	Bacteria	Firmicutes	Clostridia	Lachnospirales	Lachnospiraceae	Hungatella	unidentified	0	0.000134066	0	0.000199954	0	0	0	0	3.97691e-05	0	0	0	0.000177439	0	0	0	0	0.000432883	0	0	0	0	0.000175649	0	0	0	0	0	0	0	0	0	0	6.83021e-05	0	0	0	0	0.000292638	0	0	0
468	Bacteria	Firmicutes	Clostridia	Lachnospirales	Lachnospiraceae	Hungatella	uncultured_bacterium	0	0	0	0	0	0	0	0	0	0	0	0	0	0	0	0	0	0	0	0	0	0	0	0	0	0	0	0	0	0	0	0	0	0	0	0	0	0	0.00122629	0	0	0
469	Bacteria	Firmicutes	Clostridia	Lachnospirales	Lachnospiraceae	Lachnoclostridium	unidentified	0.00288935	0.00351254	0.00724375	0.000599861	0.00479244	0.0176653	0.00105185	0.00213246	0.00399679	0.00399163	0.0158901	0.00385025	0.000199619	0.00564352	0.000558649	0.00383126	0.00100505	0.0951125	0.00379668	0.0162408	0.00494859	0.00294061	0.00342516	0.0111807	0.00517523	0.00181888	0.00468323	0.00510148	0.00541861	0.00726938	0.00312017	0.02748	0.00353065	0.00189538	0.0061762	0.0107735	0.00380988	0.00400396	0.0199133	0.00437372	0.0108855	0.0032467
470	Bacteria	Firmicutes	Clostridia	Lachnospirales	Lachnospiraceae	Lachnoclostridium	Eubacterium_sp.	0	0.000804397	0	0	0	0	0	0	0	0	0	0	0	0	0	0	0	0	0	0.000232313	0	0	0	0	0	0	0	0	0	0	0	0	0	0.000113837	0	0	0	0	0	0	0	0
471	Bacteria	Firmicutes	Clostridia	Lachnospirales	Lachnospiraceae	Lachnoclostridium	Mordavella_sp.	0	0	0	0	0	0	0	0	0	0	0	0	0	0	0	0	0	0	0	0	0	0	0	0	0	0	0	0	0	0	0	0	0	0	0	0	0	0	0	0	0	0
472	Bacteria	Firmicutes	Clostridia	Lachnospirales	Lachnospiraceae	Lachnoclostridium	Clostridium_aldenense	0	0.00128704	0	0.000126287	0	0.00206331	0	0	4.63973e-05	0	0	0	0	0	0	0	0	0.00109573	0	0.00095037	0	0	0	0	0.000227483	0	0	0	0.000161194	0	0	0	0	0.000136604	0	0	0	0	0.000418054	0	0	0
473	Bacteria	Firmicutes	Clostridia	Lachnospirales	Lachnospiraceae	Lachnoclostridium	Clostridium_scindens	0	0	0	0.000347288	0	0.000734878	0	0	0	0	0	0	0	0	0	0	0	0	0	0	0	0	0	0	0	0	0	0	0	0	0	0	0	0	0	0	0	0	0	0	0	0
474	Bacteria	Firmicutes	Clostridia	Lachnospirales	Lachnospiraceae	Lachnoclostridium	human_gut	0.00264518	0.000777584	0.000309102	0	0.00235467	0.00641605	0.00144205	0	0.000159076	0.00125143	0.000899046	0	0.000133079	0.0017323	0	0.00013303	0	0.000135276	0	0.00141499	0	0.00053737	0.000380573	0	0	0.00102229	0	0	0.00136395	0	0.000378203	0.000601022	0.00113103	0	0.00059159	0.000461393	0	0.00214444	0	0.000241764	0.000347145	0.000632252
475	Bacteria	Firmicutes	Clostridia	Lachnospirales	Lachnospiraceae	Lachnoclostridium	uncultured_organism	0.0024417	0	0.00362859	0.0023784	0.00250703	0.000452233	0.00032234	0.00124394	0.00173658	0.00122985	0.00128584	0.00262145	0	0.00110976	0.000720838	0.00113076	0.00100505	0	0.00112874	0.00882788	0.000895866	0.00053737	0.000614772	0.0113154	0.00783394	0.000464678	0.0016017	0.00159078	0.00188473	0.000830787	0.00526332	0.00981669	0.00521192	0.000347202	0.00293429	0.0138418	0.0135673	0.000299922	0.000181157	0.000857162	0.00128939	0.00119615
476	Bacteria	Firmicutes	Clostridia	Lachnospirales	Lachnospiraceae	Lachnoclostridium	unidentified	0	0	0	0	0	0	0	0	0	0	0	0	0	0	0	0	0	0	0	0	0	0	0	0	0	0	0	0	0	0	0	0	0	0	0	0	0	0	0	0	0	0
477	Bacteria	Firmicutes	Clostridia	Lachnospirales	Lachnospiraceae	Lachnospira	unidentified	0.00142433	0	0	0.00615647	0.000484785	0	0.00480117	0.0117285	0.00477229	0.00256759	0.02786	0.00262145	0.000243978	0.0060766	0.00484763	0.00528129	0.0049272	0	0.00437504	0.0010982	0.00277292	0.00380637	0.00218098	0.0227655	0.013521	0.000358466	0.00423058	0.00389468	0	0.018752	0.0155694	0.00717887	0.0115396	0.000478115	0.012802	0.00309133	0.000443517	0.00367404	0.00183944	0.00883536	0	0.010304
478	Bacteria	Firmicutes	Clostridia	Lachnospirales	Lachnospiraceae	Lachnospira	gut_metagenome	0	0	0	0	0	0	0	0	0	0	0	0	0	0	0	0	0	0	0	0	0	0	0	0	0	0	0	0	0	0	0	0	0	0	0	0	0	0	0	0.00217587	0	0
479	Bacteria	Firmicutes	Clostridia	Lachnospirales	Lachnospiraceae	Lachnospira	uncultured_bacterium	0.00964473	0	0.00221747	0.0239523	0.012175	0	0.0121811	0	0.00297605	0.0216627	0	0.00589826	0	0.0108134	0.0154439	0.0161232	0.00245134	0	0.00834896	0.00388596	0.0235058	0.00574687	0.00244445	0	0.000824625	0	0.00170616	0.0291827	0.00484823	0.00252203	0	0.00180307	0.00337781	0.0162901	0.0190729	0.0227697	0.00135963	0.00224942	0	0.0205059	0.00290114	0.00970592
480	Bacteria	Firmicutes	Clostridia	Lachnospirales	Lachnospiraceae	Lachnospiraceae	unidentified	0	0	0	0	0	0	0	0	0	0	0	0	0	0	0	0	0	0	0	0	0.000938527	0	0	0	0	0	0	0	0	0	0	0.000934923	0	0	0	0	0	0	0	0	0	0
481	Bacteria	Firmicutes	Clostridia	Lachnospirales	Lachnospiraceae	Lachnospiraceae	uncultured_organism	0	0.000214506	0	0	0	0	0	0	0	0	7.31781e-05	0	0	0	0	0	0	0	0	0	0	0	0	0	0	0	0	0	0	0.00032638	0	0.000400681	0.000229263	0	0	0.000138418	0.000908846	0	0	0	0	0
482	Bacteria	Firmicutes	Clostridia	Lachnospirales	Lachnospiraceae	Lachnospiraceae_FCS020_group	unidentified	0	0	0	0	0	0	0	0	0	0.000388375	0	0	0.000221798	0	0	0	0	0	0	0	0	0	0	0	0	0	0	0	0	0	0	0	0	0	0	0	0	0	0	0	0	0
483	Bacteria	Firmicutes	Clostridia	Lachnospirales	Lachnospiraceae	Lachnospiraceae_FCS020_group	metagenome	0	0	0	0	0	0	0	0	0	0	0	0	0	0	0	0	0	0	0.000214554	0	0	0	0	0	0	0	0	0	0	0	0	0	0	0	0	0	0	0	0	0	0	0
484	Bacteria	Firmicutes	Clostridia	Lachnospirales	Lachnospiraceae	Lachnospiraceae_FCS020_group	uncultured_organism	0	0	0.000147832	0.000252573	0	0	0	0.000195476	0.000245243	0	0	0	0.000288338	0	0	0.000545423	0.000343188	0	0.000447765	0	0	0	0	0	0	0.000358466	0	0	0	0	0	0	0	0.000398429	0	0	0	0	0	0	0	0
485	Bacteria	Firmicutes	Clostridia	Lachnospirales	Lachnospiraceae	Lachnospiraceae_FE2018_group	uncultured_bacterium	0	0	0	0	0	0	0	0	0	0	0	0	0	0	0	0	0	0	0	0	0	0	0	0	0	0	0	0	0	0	0	0	0	4.55347e-05	0	0	0	0	0	0	0	0
486	Bacteria	Firmicutes	Clostridia	Lachnospirales	Lachnospiraceae	Lachnospiraceae_NC2004_group	unidentified	0	0	0	0	0	0	0	0	0	0	0	0	0	0	0	0	0	0	0	0	0	0	0	0	0	0	0	0	0	0	0	0	0	0	0	0	0	0	0	0	0	0
487	Bacteria	Firmicutes	Clostridia	Lachnospirales	Lachnospiraceae	Lachnospiraceae_NC2004_group	uncultured_Clostridiaceae	0	0	0	0	0	0	0	0	0	0	0	0	0	0	0	0	0	0	0	0	0	0	0	0	0	0	0	0	0	0	0	0	0	0	0	0	0	0	0	0	0	0
488	Bacteria	Firmicutes	Clostridia	Lachnospirales	Lachnospiraceae	Lachnospiraceae_NC2004_group	uncultured_bacterium	0	0	0	4.20955e-05	0	0	0	0	0	0	0	0	2.21798e-05	0	0	0	0	4.05828e-05	0	0	0	0	0	0	9.95237e-05	0	0	0	0	0	0	0	4.58526e-05	0	0	4.61393e-05	0	0	0	0	0	0
489	Bacteria	Firmicutes	Clostridia	Lachnospirales	Lachnospiraceae	Lachnospiraceae_NC2004_group	uncultured_organism	0	0	0	0	0	0	0	0	0	0	0	0	0	0	0	0	0	0	0	0	0	0	0	0	0	0	3.48195e-05	0	0	0	0	6.67802e-05	0	0	0	0	0	0	0	0	0	0
490	Bacteria	Firmicutes	Clostridia	Lachnospirales	Lachnospiraceae	Lachnospiraceae_ND3007_group	unidentified	0	0	0	0	0	0	0	0	0	0	0	0	0	0	0	0	0	0	0	0	0	0	0.000161012	0	0	0	0	0	0	0	0	0	0	0	0	0	0	0	0	0	0	0
491	Bacteria	Firmicutes	Clostridia	Lachnospirales	Lachnospiraceae	Lachnospiraceae_ND3007_group	metagenome	0	0	0.000403177	0.00256783	0.000221616	0	0	0.000639738	0.00624374	0.00291281	0.000386799	0	0.000998093	0.000568413	0.00230668	0.00367163	0.000784429	0	0.00054105	0.000359029	0.000341282	0	0	0	0.000270136	0.000424848	0.00464841	0	0	0.000504406	0	0.000801362	0.000703074	0.00036997	0.000165645	0.000576741	0	0.000329914	0	0.00182422	0	0.000119615
492	Bacteria	Firmicutes	Clostridia	Lachnospirales	Lachnospiraceae	Lachnospiraceae_NK4A136_group	unidentified	0.003337	0.0175895	0.0493086	0.00313612	0.00560965	0	0.0044449	0.0120129	0.0155762	0.00724966	0.00796596	0.01024	0.000487956	0.00996075	0.00376638	0.0075428	0.0408884	0	0.0517076	0.00705385	0.0144192	0.00313466	0.0317632	0.00572506	0.00181986	0.0302572	0.00175839	0.00872189	0	0.0185147	0.00828895	0.0100838	0.0254482	0.00469008	0.0136066	0.0287217	7.27077e-05	0.0179953	0	0.0212312	0.000743882	0.00201637
493	Bacteria	Firmicutes	Clostridia	Lachnospirales	Lachnospiraceae	Lachnospiraceae_NK4A136_group	Lachnospiraceae_bacterium	0	0	0	0	0	0	0	0	0	0	0	0	0	0	0	0	0	0	0	0.00137276	0	0	0	0	0	0	0	0	0	0	0	0	0	0	0	0	0	0	0	0	0	0
494	Bacteria	Firmicutes	Clostridia	Lachnospirales	Lachnospiraceae	Lachnospiraceae_NK4A136_group	gut_metagenome	0	0	0	0	0	0	0	0.0683809	0	0	0	0	0	0	0.00401867	0	0	0	0	0	0	0	0	0	0	0	0	0	0	0	0	0	0	0	0	0	0	0.000434887	0	0	0	0
495	Bacteria	Firmicutes	Clostridia	Lachnospirales	Lachnospiraceae	Lachnospiraceae_NK4A136_group	human_gut	0	0	0	0	0	0	0	0	0	0	0	0	0	0	0	0	0	0	0	0	0	0	0	0	0	0	0	0	0	0	0	0	0	0	0	0	0	0	0	0	0	0
496	Bacteria	Firmicutes	Clostridia	Lachnospirales	Lachnospiraceae	Lachnospiraceae_NK4A136_group	metagenome	0	0	0	0	0	0	0	0	0	0	0	0	0	0	0	0.000106424	0	0	0	0	0	0	0	0	0	0	0	0	0	0	0.00189101	0	0	0	0	0	0	0	0	0	0	0
497	Bacteria	Firmicutes	Clostridia	Lachnospirales	Lachnospiraceae	Lachnospiraceae_NK4A136_group	uncultured_Clostridium	0	0	0	0	0.000429381	0.000197852	0.000373236	0.000479804	8.61663e-05	0	0.000219534	0.00360449	0	0	0	0.000279363	0.0011031	0	0.000531721	0	0.000511924	0.000806054	0.000439123	0	0	0	0.00161911	0	0	0	0.000756406	0.0013356	0.000198695	0	0	0.000876647	0	0	0	0.000307699	0	0
498	Bacteria	Firmicutes	Clostridia	Lachnospirales	Lachnospiraceae	Lachnospiraceae_NK4A136_group	uncultured_organism	0.0333293	0	0.00100794	0	0.00106653	0	0.00137419	0.00120839	0.00344002	0.0102056	0.000637695	0.00245761	0.000354877	0.00119096	0.00142365	0.00155645	0.0177967	0	0.00314369	0.000844773	0.00115183	0.000716493	0.000951433	0.00559035	0	0.000770038	0.00264629	0.00274273	0	0.00136486	0	0.00941601	0.00369878	0	0.00312359	0.00438323	0	0.0019045	0	0.00184619	0	0.00164044
499	Bacteria	Firmicutes	Clostridia	Lachnospirales	Lachnospiraceae	Lachnospiraceae_UCG-001	unidentified	0	0	0	0.00157858	0.00102497	0	0.000152687	0	0.00918666	0.00330118	0	0.00212993	0	0	0.000324377	0.00512166	0	0	0.00361944	0	0	0.000477662	0	0	0.00061136	0	0	0.000219419	0	0	0	0	0	0	0	0	0	0	0	0.00951669	0	0.00285368
500	Bacteria	Firmicutes	Clostridia	Lachnospirales	Lachnospiraceae	Lachnospiraceae_UCG-001	Lachnospiraceae_bacterium	0	0	0	0.00539875	0	0	0	0	0.000550139	0	0.00112903	0	0	0	0	0.000558726	0	0	0.00809709	0	0.000639904	0	0	0	0	0.000119489	0	0	0	0	0	0	0.000427958	0	0	0	0	0	0	0	0	0
501	Bacteria	Firmicutes	Clostridia	Lachnospirales	Lachnospiraceae	Lachnospiraceae_UCG-001	metagenome	0	0	0	0	0.00146821	0	0.00103488	0	0.00237289	0.0039269	0	0	0.000532316	0	0.000414482	0	0	0	0	0	0	0	0	0	0.0147437	0	0.000278556	0	0	0	0.000661855	0.000200341	0.00519663	0.000665946	0	0.00498304	0	0	0.000125416	0.00294512	0	0
502	Bacteria	Firmicutes	Clostridia	Lachnospirales	Lachnospiraceae	Lachnospiraceae_UCG-003	gut_metagenome	0	0	0	0	0	0	0	0	1.98845e-05	0	0	0	0	0	0	0	0	0	0	0	0	0	0	0	0	0	0	0	0	0	0	0	0	0	0	0	0	0	0	0	0	0
503	Bacteria	Firmicutes	Clostridia	Lachnospirales	Lachnospiraceae	Lachnospiraceae_UCG-003	uncultured_bacterium	0	0	0	0	0	0	0.00193404	0.00360741	0.00524289	0.00330118	0	0	0	0	0	0.00376475	0	0	0.00144591	0	0	0.000164196	0	0	0	0	0.000470064	0	0	0	0	0.0020368	0	0	0	0	0	0	0	0	0	0
504	Bacteria	Firmicutes	Clostridia	Lachnospirales	Lachnospiraceae	Lachnospiraceae_UCG-004	unidentified	0.00142433	0	0.00540257	0.00372545	0.00261784	0	0.000441097	0.000319869	0.00231323	0.00159665	0.00355437	0.00868354	0	0.000257139	0.00117136	0.00706389	0.000735402	0	0.00295712	0.000654699	0.000853206	0.0017166	0	0.00909275	0.000838843	0.00163301	0	0.00104224	0.000185993	0.0018396	0.000977024	0.00170289	0.00253718	0.00667653	0.00345489	0.000692089	0.000523495	0.00218943	0.000376249	0.00443966	0.00292593	0
505	Bacteria	Firmicutes	Clostridia	Lachnospirales	Lachnospiraceae	Lachnospiraceae_UCG-004	uncultured_bacterium	0	0	0	0	0	0	0	0	0	0.000280493	0	0	4.43597e-05	0	0	0	0	0	0	0	0	0	0	0	0	0	0	0	0	0	0.000189101	0	0	2.27674e-05	4.73272e-05	0	0	5.99844e-05	0	0	7.43882e-05	0
506	Bacteria	Firmicutes	Clostridia	Lachnospirales	Lachnospiraceae	Lachnospiraceae_UCG-004	uncultured_organism	0	0	0	0	0	0	0	0	0	0	0.000219534	0	0	0	0	0	0	0	0	0	0	0	0	0	0	0	0	0	0	0	0	0	0	0	0	0	0	0	0	0	0	0
507	Bacteria	Firmicutes	Clostridia	Lachnospirales	Lachnospiraceae	Lachnospiraceae_UCG-007	uncultured_bacterium	0	0	0	0	0	0	0	0	0	0	0	0	0	0	0	0	0	0	0	0	0	0	0	0	0	0	0	0	0	0	0	0	0	0	0	0	0	0	0	0	0	0
508	Bacteria	Firmicutes	Clostridia	Lachnospirales	Lachnospiraceae	Lachnospiraceae_UCG-008	metagenome	0	0	0	0	0	0	0	0.000124394	3.31409e-05	0	4.18161e-05	0	6.65395e-05	0	0	0	0	0	0	0	0	0	0	0	0	0	0	0	0	0	0	0	0	0	0	0	0	0	0	0	0	8.54394e-05
509	Bacteria	Firmicutes	Clostridia	Lachnospirales	Lachnospiraceae	Lachnospiraceae_UCG-010	unidentified	0	0	0	0	0	0	0	0	9.94227e-05	0	0	0	0	0	0	0	0	0	0	0	0	0	0.000351298	0	0	0	0	0.00515634	0	0	0	0	0	0	4.73272e-05	0	0	0	0	0	0	0
510	Bacteria	Firmicutes	Clostridia	Lachnospirales	Lachnospiraceae	Lachnospiraceae_UCG-010	uncultured_bacterium	0	0.000375385	0	0	0.000180063	0	0.000152687	0.000213246	0.000178961	0.000453104	0.00130675	0.00180224	4.43597e-05	0.000324807	7.20838e-05	0.00013303	0.00112762	0.000229969	0.0031157	0	0.000255962	0.00053737	0.000175649	0.00107766	0.000369659	0	0	0.00109709	0	0.00032638	0.000189101	0	0.0002904	0.000324435	0.0018221	0.000461393	0	0.000569852	0.000362314	0.000483527	0.00094225	0.000375933
511	Bacteria	Firmicutes	Clostridia	Lachnospirales	Lachnospiraceae	Lachnospiraceae_UCG-010	uncultured_organism	0	0	0	0.00142072	0	0.00062182	0.000559853	0.00035541	0	0.000366798	0.000229988	0	0	0	0.00124344	0.000438999	0	0	0.000167912	0	0.000469263	0.000970251	0.00131737	0.00181855	0	0	0.000522293	0	0	0.00228466	0	0.00614378	0.00163541	0	0.00340756	0	0	0	0	0.000813205	0.00302512	0
512	Bacteria	Firmicutes	Clostridia	Lachnospirales	Lachnospiraceae	Lactonifactor	unidentified	0	0	0	0	0	0	0	0	0	0	0	0	0	0	0	0	0	0	0	0	0	0	0	0	0	0	0	0	0	0	0	0	0	0	0	0	0	0	0	0	0	0
513	Bacteria	Firmicutes	Clostridia	Lachnospirales	Lachnospiraceae	Marvinbryantia	unidentified	0	0	0	0.000315716	0	0	0	0	0.000430832	0	7.31781e-05	0	0	9.47354e-05	0	9.3121e-05	0	0	0.00226681	0	0	0	0	0	0	0.000106212	0	0	0	0	0.000315169	0	0.000351537	0	0	0	0	0	0	0	0	0
514	Bacteria	Firmicutes	Clostridia	Lachnospirales	Lachnospiraceae	Marvinbryantia	metagenome	0	0	0	0	0	0	0	0	0.000139192	0	0	0	0.000221798	0	0	9.3121e-05	0	0	0.000149255	0	0	0	0	0	0	0.000212424	0	0	0	0	0.000504271	0	0	0	0	0	0	0	0	0	0	0
515	Bacteria	Firmicutes	Clostridia	Lachnospirales	Lachnospiraceae	Marvinbryantia	uncultured_organism	0	0	0	0	0	0	0	0	0	0	0	0	0	0	0	0	0	0	0	0.000126716	0	0	0	0	0	0	0	0	0	0	0	0	0	0	0	0	0	0	0	0	0	0
516	Bacteria	Firmicutes	Clostridia	Lachnospirales	Lachnospiraceae	Moryella	human_gut	0	0	0	0	0	0	0.000186618	0.000213246	0.000550139	0.000431527	6.27241e-05	0.00139264	0.000110899	0.000676682	0	0.000159636	0	0	0.000587692	0	0.000383943	8.95616e-05	0.000204924	0.000538829	0	0.000172595	0.000400425	0	0	0.000178026	0.000378203	0	0.000519663	0	0.000283963	0.000415254	0	0	0	0.000307699	0	6.83515e-05
517	Bacteria	Firmicutes	Clostridia	Lachnospirales	Lachnospiraceae	Oribacterium	uncultured_bacterium	0	0	0	0	0	0	0	0	0	0	6.27241e-05	0	0	0	0	0	0	0	0	0	0	0	0	0	0	0	0	0	0	0	0	0	0	0	0	0	0	0	0	0	0	0
518	Bacteria	Firmicutes	Clostridia	Lachnospirales	Lachnospiraceae	Roseburia	unidentified	0.00394742	0.00410243	0.00288944	0.0403486	0.0191975	0	0.0130124	0.00344748	0.0165042	0.0282866	0.0026135	0.00516097	0.000399237	0.00963595	0.00529816	0.0070772	0.000343188	0	0.0136475	0.0212883	0.00511924	0.00832923	0.00150766	0.00942951	0.00632686	0.000238977	0.00268111	0.00735052	0.00238072	0.0200872	0.000315169	0.000901533	0.00482981	0.0101998	0.00738304	0.00618267	0.000421705	0.00100474	0.0150082	0.00446164	0	0.00365681
519	Bacteria	Firmicutes	Clostridia	Lachnospirales	Lachnospiraceae	Roseburia	Roseburia_faecis	0	0	0	0	0	0	0	0	0	0	0	0	0	0	0	0	0	0	0	0	0	0	0	0	0	0	0	0	0	0	0	0	0	0	0	0	0	0	0	0	0	0
520	Bacteria	Firmicutes	Clostridia	Lachnospirales	Lachnospiraceae	Roseburia	Roseburia_hominis	0.00252309	0	0.00456934	0.000452527	0	0	0.000559853	0	0.000444088	0.00248128	0.00130675	0	0.000931553	0.00128569	0	0.00365833	0	0	0.000326496	0.00177402	0	0	0.000395211	0	0	0.00207114	0.0026637	0.00252331	0	0.00281874	0.00107157	0.00320545	0.000611368	0	0	0.000853577	0.000196311	0.000944754	0	0.00301106	0.000223164	0.0018284
521	Bacteria	Firmicutes	Clostridia	Lachnospirales	Lachnospiraceae	Roseburia	Roseburia_inulinivorans	0	0	0	0	0	0	0	0	0	0	0	0	0	0	0	0	0	0	0	6.3358e-05	0	0	0	0	0	0	0	0	0	0	0	0	0	0	0	0	0	0	0	0	0	0
522	Bacteria	Firmicutes	Clostridia	Lachnospirales	Lachnospiraceae	Roseburia	gut_metagenome	0	0	0.000201589	0	0	0	0	0.000159935	0.000106051	0.000280493	0	0	0.000199619	0.000257139	0.000792921	0.000239454	0	0	0	0	0	0	0	0	4.2653e-05	0	0.000365605	0	0	0	0	0	0	0.000159372	0	0	0	0	0	0.000131871	0	0
523	Bacteria	Firmicutes	Clostridia	Lachnospirales	Lachnospiraceae	Roseburia	uncultured_Roseburia	0.000406951	0	0.0113158	0	0.000318573	0	0	0.000248787	0.00208788	0	0	0	0	0.000216538	0.00102719	0.000146333	0.00105408	0	0.000158584	0	0	0	0	0	0	0.00389002	0	0	0	0	0	0	0	0	0.000520599	0	0	0.00034491	0	0.00252753	0	0.000307582
524	Bacteria	Firmicutes	Clostridia	Lachnospirales	Lachnospiraceae	Roseburia	uncultured_bacterium	0	0	0	0	0	0	0	0	0	0	0	0	0	0	0	0	0	0	0	0	0	0	0	0	0	0	0	0	0	0	0	0	0	0	0	0	0	0	0	0	0	0
525	Bacteria	Firmicutes	Clostridia	Lachnospirales	Lachnospiraceae	Sellimonas	unidentified	0	0	0	0	0	0	0	0	0	0	0	0	0	0	0	0	0	0.000378773	0	0	0	0	0	0	0	0	0	0	0	0	0	0	0	6.83021e-05	0	0	0	0	0	0	0	0
526	Bacteria	Firmicutes	Clostridia	Lachnospirales	Lachnospiraceae	Sellimonas	Lachnoclostridium_phocaeense	0	0	0	0	0	0	0	0	0	0	0	0	0	0	0	0	0	0	0	0	0	0	0	0	0	0	0	0	0	0	0	0	0	5.12266e-05	0	0	0	0	0	0	0	0
527	Bacteria	Firmicutes	Clostridia	Lachnospirales	Lachnospiraceae	Sellimonas	Sellimonas_intestinalis	0	0	0	0	0	0	0	0	0	0	0	0	0	0	0	0	0	0	0	0	0	0	0	0	0	0	0	0	0	0	0	0	0	0	0	0	0	0	0	0	0	0
528	Bacteria	Firmicutes	Clostridia	Lachnospirales	Lachnospiraceae	Sellimonas	uncultured_bacterium	0	0	0	0	0	0.000706614	0	0	0	0	0	0	0	0	0	0	0	0	0	0.000802534	0	0	0	0	0.000597142	0	0	0	0	0	0	0	0	0	0	0	0	0	0.000529536	0	0	0
529	Bacteria	Firmicutes	Clostridia	Lachnospirales	Lachnospiraceae	Sellimonas	uncultured_organism	0	0	0	0	0	0	0	0	0	0	0	0	0	0	0	0	0	0.00114985	0	0	0	0	0	0	0	0	0	0	0	0	0	0	0	0	0	0	0	0	0	0	0	0
530	Bacteria	Firmicutes	Clostridia	Lachnospirales	Lachnospiraceae	Shuttleworthia	uncultured_bacterium	0	0	0	0	0	0	0	0	0	0	0	0.00188416	0	0	0	0	0	0	0	0	0	0	0	0	0	0	0	0	0	0	0	0	0	9.67613e-05	0	0	0	0	0	0	0	0
531	Bacteria	Firmicutes	Clostridia	Lachnospirales	Lachnospiraceae	Tuzzerella	unidentified	0	0	0	0	0	0	0	0	0	0	0	0	0	0	0	0	0	0	0	0	0	0	0	0	0	0	0	0	0	0	0	0	0	0	0	0	0	0	0	0	0	0
532	Bacteria	Firmicutes	Clostridia	Lachnospirales	Lachnospiraceae	Tuzzerella	uncultured_bacterium	0	0	0	0	0	0	0	0	0	0	0	0	8.87193e-05	0	0	0	0	0	9.32845e-05	0	0	0	0	0	0	0	0	0	0	0	0	0	0	0	0	0	0.000101791	0	0	0	0	0
533	Bacteria	Firmicutes	Clostridia	Lachnospirales	Lachnospiraceae	Tyzzerella	unidentified	0	0	0	0	0	0.000989259	0	0	0	0	0	0	0.000243978	0	0	0	0	0	0	0.000802534	0	0	0	0	0	0	0	0	0.000880369	0.000593419	0	0.000434071	0	0	0	0	0	0	0.00111481	0	0	0
534	Bacteria	Firmicutes	Clostridia	Lachnospirales	Lachnospiraceae	Tyzzerella	Anaerotignum_lactatifermentans	0.00024417	0	0.000470373	0	0.00145435	0.000876201	0	0	0	0	0	0	0	0	0	0	0	0	0	0.00570222	0	0	0	0	0	0.000146042	0	0	0.000173594	0	0	0	0	0	0	0	0	0.0034641	0.00490517	0	0	0
535	Bacteria	Firmicutes	Clostridia	Lachnospirales	Lachnospiraceae	Tyzzerella	unidentified	0	0	0	0.00121025	0	0	0	0	0.00163716	0.003107	0.00171446	0	0	0	0.00322575	0.000412393	0	0	0	0	0	0	0	0	0.000156394	0	0	0	0	0	0	0	0.000397389	0	0.00184576	0.00140725	0.00199219	0	0	0	0	0
536	Bacteria	Firmicutes	Clostridia	Lachnospirales	Lachnospiraceae	UC5-1-2E3	uncultured_bacterium	0	0	0	0	0	0	0	0	0	0	0	0	0	0	0	0	0	0	0	0	0	0	0	0	0	0	0	0	0	0	0	0	0	0.000227674	0	0	0	0	0	0	0	0
537	Bacteria	Firmicutes	Clostridia	Lachnospirales	Lachnospiraceae	Bacteroides_pectinophilus_group	Bacteroides_pectinophilus	0	0	0	0	0	0	0	0	0	0	0	0	0	0	0	0	0	0	0	0	0	0	0	0	0	0	0	0	0	0	0	0	0	0	0	0	0	0	0	0	0	0
538	Bacteria	Firmicutes	Clostridia	Lachnospirales	Lachnospiraceae	Bacteroides_pectinophilus_group	uncultured_bacterium	0	0	0	0	0	0	0	0	0	0	0	0	0	0	0	0	0	0	0	0	0	0	0	0	0	0	0	0	0	0	0	0	0	0	0	0	0	0.000389899	0	0	0	0
539	Bacteria	Firmicutes	Clostridia	Lachnospirales	Lachnospiraceae	Eubacterium_eligens_group	unidentified	0.00378464	0.0236761	0.0201051	0.0161542	0.000166212	0.00248728	0.00646376	0.0207204	0.0153111	0.0151035	0	0.00802818	0.000332698	0.00228718	0.00571264	0.0101369	0.0027455	0	0.00125934	0.00927138	0.00221834	0.00631409	0.00531339	0.0546238	0	0.00970513	0.00778217	0.01322	0.000533181	0.00267039	0.00513726	0.00407359	0.0100723	0.0193238	0	0.00286064	0	0.000839782	0.019133	0.0043957	0.000371941	0.00116198
540	Bacteria	Firmicutes	Clostridia	Lachnospirales	Lachnospiraceae	Eubacterium_eligens_group	human_gut	0	0	0	0	0	0	0	0	0	0	0	0	0	0	0	2.6606e-05	0	0	0	0	0	0	0	0	0	0	0	0	0	0	0	0	0	0	0	0	0	0	0	0	0	0
541	Bacteria	Firmicutes	Clostridia	Lachnospirales	Lachnospiraceae	Eubacterium_hallii_group	unidentified	0.000773206	0	0.000443495	0.00188377	0.00117733	0.0035896	0.000254479	0.000177705	0.00132564	0.000280493	0.00171446	0	0.000487956	0.000649614	0.00135157	0.000438999	0.00093151	0	0.00041978	0.00126716	0.000469263	0.000701566	0.000556222	0	0.00220374	0.000849697	0.00198471	0	0.000657177	0.000504406	0.000315169	0.00200341	0.00209394	0.000796858	0.000283963	0.000484463	0.000319914	0.00287925	0	0.000351656	0.00156215	0.000666427
542	Bacteria	Firmicutes	Clostridia	Lachnospirales	Lachnospiraceae	Eubacterium_hallii_group	uncultured_Eubacterium	0	0	0	0	0	0	0	0	0	0	0	0	0	0	0	0	0	0	0	0	0	0	0	0	0	0	0	0	0	0	0	0	0	0	0	0	0	0	0	0	0	0
543	Bacteria	Firmicutes	Clostridia	Lachnospirales	Lachnospiraceae	Eubacterium_hallii_group	uncultured_bacterium	0	0.000589891	0	0	0	0	0	0	0	0	0	0	0	0	0	0	0	0	0	0	0	0	0	0	0	0	0	0	0	0	0	0	0	0	0	0	0	0	0	0	0	0
544	Bacteria	Firmicutes	Clostridia	Lachnospirales	Lachnospiraceae	Eubacterium_oxidoreducens_group	unidentified	0	0	0	0	0	0	0	0	0	0	0	0	2.21798e-05	0	0	0	0	0	0	0	0	0	0	0	0	0	0	0	0	0	0	0	0	0	0	0	0	0	0	0	0	0
545	Bacteria	Firmicutes	Clostridia	Lachnospirales	Lachnospiraceae	Eubacterium_oxidoreducens_group	uncultured_bacterium	0	0	0	0	0	0	0	0	0	6.47291e-05	0	0	2.21798e-05	4.06009e-05	0	0	0	0	0	0	0	0	0	0	0	0	0	0	0	0	0	0	0	0	4.73272e-05	0	0	0	0	8.7914e-05	0	0
546	Bacteria	Firmicutes	Clostridia	Lachnospirales	Lachnospiraceae	Eubacterium_ruminantium_group	unidentified	0	0	0	0	0	0	0	0	0	0	0	0	0	0	0	0	0	0	0	0	0	0	0	0	0	0	0	0	0	0	0	0	0	0	0	0	0	0	0	0	0	0
547	Bacteria	Firmicutes	Clostridia	Lachnospirales	Lachnospiraceae	Eubacterium_ruminantium_group	gut_metagenome	0	0	0	0	0	0	0	0	0	0	0	0	0	0	0	0	0	0	0	0	0	0	0	0	0	0	0	0	0	0	0	0	0	1.13837e-05	0	0	0	0	0	0	0	0
548	Bacteria	Firmicutes	Clostridia	Lachnospirales	Lachnospiraceae	Eubacterium_ruminantium_group	uncultured_bacterium	0	0	0	0.0115868	0.00182833	0	0.0134874	0	0.00214753	0	0	0.00147456	0.000377057	0	0.000144168	0	0.005491	0	0.00145524	0.0122492	0.020221	0.00161211	0	0	0	0.0253714	0.0033775	0.00905101	0	0.00851556	0.00422327	0	0.00304156	0.0125676	0	0.0328973	0	0.00668826	0	0.00145058	0.00116541	0
549	Bacteria	Firmicutes	Clostridia	Lachnospirales	Lachnospiraceae	Eubacterium_ventriosum_group	unidentified	0	0	0.00157239	0.00548294	0.000124659	0.0089316	0.000271444	0	0.00101411	0.00187714	0.00457886	0.00966658	0	0.00128569	0.00254095	0.000412393	0.000367701	0	0	0	0	0.000164196	0	0.00127972	0.0016066	0.000398295	0.000261147	0.056994	0	0.0060232	0.000157585	0	0.000489095	7.96858e-05	0.00101753	0.000346045	0.000370809	0.00124468	0	0.000373635	0	0.000956921
550	Bacteria	Firmicutes	Clostridia	Lachnospirales	Lachnospiraceae	Eubacterium_ventriosum_group	uncultured_Eubacterium	0	0	0	0	0	0	0	0	0.00284349	0	0	0	0	0	0	0	0	0	0.000130598	0	0	0	0	0	0	0	0	0	0	0	0	0	0	0	0	0	0	0	0	0	0	0
551	Bacteria	Firmicutes	Clostridia	Lachnospirales	Lachnospiraceae	Eubacterium_ventriosum_group	uncultured_Lachnospiraceae	0	0	0	0	0	0	0	0	0	0	0	0	0	0	0	0	0	0	0	0	0	0	0	0	0	0	0	0	0	0	0	0	0	0	0	0	0	0	0	0	0	0
552	Bacteria	Firmicutes	Clostridia	Lachnospirales	Lachnospiraceae	Eubacterium_ventriosum_group	uncultured_bacterium	0	0	0.00188149	0	0	0	0	0.000977378	0.000941201	0	0	0	0.000177439	0	0.0022346	3.9909e-05	0	0	0	0.00439282	0	0	0	0	0	0	0.000609342	0	0	0.000534077	0	0	0	0.000700097	0.000496936	0.00066902	0	0.00145462	0	0.000835183	0	0
553	Bacteria	Firmicutes	Clostridia	Lachnospirales	Lachnospiraceae	Eubacterium_xylanophilum_group	unidentified	0	0	0	0	0	0	0	0.00447817	0.00206799	0.0148661	0.00180855	0	0.000155259	0	0.00252293	0.00770244	0	0	0.00170711	0	0	0	0	0	0.00287197	0	0.00153206	0	0	0	0.00122916	0.000233731	0	0	0	0	0	0	0	0.000197807	0	0
554	Bacteria	Firmicutes	Clostridia	Lachnospirales	Lachnospiraceae	Eubacterium_xylanophilum_group	uncultured_bacterium	0	0	0	0	0	0	0	0	0	0.00280493	0	0	0	0	0.000720838	0	0	0	0	0	0	0	0	0	0	0	0	0	0	0	0	0	0	0.00443964	0	0	0	0	0	0.000549463	0	0
555	Bacteria	Firmicutes	Clostridia	Lachnospirales	Lachnospiraceae	Ruminococcus_gauvreauii_group	unidentified	0	0	0.00130361	0	0.000540189	0	0	0.000266558	7.291e-05	0.00105724	0.000595879	0	0.000576676	0.000230072	0	0.00156975	0.00093151	0	0.000475751	0.000337909	0	0.000164196	0.000365936	0.00074089	0	0	0.000243737	0	0.00110356	0	0	0	0.000275116	0	0	0.000784368	0.000138145	0.000194949	0	0	0.000867862	0
556	Bacteria	Firmicutes	Clostridia	Lachnospirales	Lachnospiraceae	Ruminococcus_gauvreauii_group	uncultured_bacterium	0	0	0	0	0	0	0	0	0	0	0	0	0	0	0	0	0	0	0	0	0	0	0	0	0	0	0	0	0	0	0	0	0	0	0	0	0	0	0	0	0	0
557	Bacteria	Firmicutes	Clostridia	Lachnospirales	Lachnospiraceae	Ruminococcus_gauvreauii_group	uncultured_organism	0	0	0	0	0	0	0	0	0	0	0	0	0	0	0	0	0	0	0	0	0	0	0	0	0	0	0	0	0	0	0	0	0	0	0	0	0	0	0	0	0	0
558	Bacteria	Firmicutes	Clostridia	Lachnospirales	Lachnospiraceae	Ruminococcus_gnavus_group	unidentified	0	0.00131385	0	0.000252573	0	0.0122386	0.000101792	0	0	0	0	0	0	0.000568413	0	0	0	0.0155297	0	0.00031679	0.000298622	0.000179123	0	0.00444534	0.000398095	0.000172595	0	0.00104224	0.00336028	0.000148355	0	0.00126882	0	0.000552109	0	0	0.000683452	0.00061484	0.00497485	0	0	0
559	Bacteria	Firmicutes	Clostridia	Lachnospirales	Lachnospiraceae	Ruminococcus_torques_group	unidentified	0	0	0.00196213	0.00089453	0.00102497	0	0.000305375	0	0.000371178	0.000366798	0	0	0.00102027	0.00613073	0.000288335	0.000478908	0.000882483	0	0	0	0.000853206	0.00164196	0.00117099	0.00518623	0.00105211	0	0.000557113	0.00778936	0.00349668	0	0.00129219	0	0.000718358	0.00253287	0.000638917	0.00184557	0.000218123	0	0	0.00140662	0.00146297	0.00143538
560	Bacteria	Firmicutes	Clostridia	Lachnospirales	Lachnospiraceae	Ruminococcus_torques_group	Ruminococcus_lactaris	0	0	0	0	0.000900314	0	0.00032234	0.000728591	9.27945e-05	0	0.000365891	0.00630786	0	0	0.00383846	0.000226151	0.000416728	0	0	0	0.000298622	0	0.000204924	0	0	0.00188526	0.00132314	0	0	0.000474735	0	0	0.0023232	0	0	0	0	0	0	0.000527484	0	0
561	Bacteria	Firmicutes	Clostridia	Lachnospirales	Lachnospiraceae	Ruminococcus_torques_group	Ruminococcus_sp.	0	0	0.000322542	8.4191e-05	0	0	0	0	0	0	0	0	0	0	0	0	0	0	0	0	0	0	0	0	0	0	0	0	0	0	0	0	0	0	0	0	0	0	0	0	0	0
562	Bacteria	Firmicutes	Clostridia	Lachnospirales	Lachnospiraceae	Ruminococcus_torques_group	Ruminococcus_torques	0	0.000804397	0	0.00018943	0	0	0	0	0	0	0	0	0.011223	0	0.00122542	0	0	0.00105515	0	0.00128828	0	0	0	0	0.0002417	0	0.000191508	0.00405924	9.91965e-05	0.000504406	0	0.00126882	0.00177297	0	0	0	0.000123603	0.000104973	0.000710692	0	0	0
563	Bacteria	Firmicutes	Clostridia	Lachnospirales	Lachnospiraceae	Ruminococcus_torques_group	uncultured_Clostridiales	0	0	0	0	0	0	0	0	0	0	0	0	0.000110899	0	0	0	0	0	0	0	0	0	0	0	0	0	0	0	0	0	0	0	0	0	0	0	0	0	0.000153287	0	0	0
564	Bacteria	Firmicutes	Clostridia	Lachnospirales	Lachnospiraceae	Ruminococcus_torques_group	uncultured_bacterium	0	0	0	0	0	0.00118711	0	0	0	0	0	0	0	0	0	0	0	0.000229969	0	0.00107709	0	0	0	0	0	0	0	0	0.000210793	0	0	0.000534242	0	0	0	0	7.99785e-05	0	0	0	0	0
565	Bacteria	Firmicutes	Clostridia	Lachnospirales	Lachnospiraceae	uncultured	unidentified	0	0	0	7.36672e-05	0.000526338	0.00101752	0	0	0	0	0	0	0	0	0	0	0	0	0	0.0010982	0	0	0	0	0	0.00150025	0	0	0.000161194	0	0	0.000667802	0	0	0	0	0	0	0	0	0	0
566	Bacteria	Firmicutes	Clostridia	Lachnospirales	Lachnospiraceae	uncultured	bacterium_enrichment	0.000488341	0	0.000389738	0	0	0	0.000135722	0.000764132	0.00043746	0.000194187	5.22701e-05	0.0012288	2.21798e-05	0	0	0.000319272	0.000294161	0.0003923	0.000475751	0	0	0.000104489	0.000248836	0	0	0	0.000452654	0	0	0.000534077	0	0	0.000259832	0.000950538	0	0	0	0.0015446	0	0.00043957	7.43882e-05	0.000205055
567	Bacteria	Firmicutes	Clostridia	Lachnospirales	Lachnospiraceae	uncultured	butyrate-producing_bacterium	0	0	0	0	0	0	0	0	0	0	0	0	0	0	0	0	0	0	0	0	0	0	0	0	0	0	0	0	0	0	0	0	0	0	0	0	5.08954e-05	0	0	0	0	0
568	Bacteria	Firmicutes	Clostridia	Lachnospirales	Lachnospiraceae	uncultured	metagenome	0	0	0	0.000347288	0	0	0	0	0.000258499	0.000560986	0.000606333	0	0	0	0	0	0	0	0	0	0	0.000313466	0	0	0	0	0	0	0	0	0	0	0.000978189	0	0	0	0	0	0	0.000703312	0	0
569	Bacteria	Firmicutes	Clostridia	Lachnospirales	Lachnospiraceae	uncultured	uncultured_Clostridium	0	0	0	0	0	0	0	0	0	0	0	0	0	0	0	0	0	0	0	0	0	0	0	0	0	0	0	0	0	0	0	0	0	0	0	0	0	0	0	0	0	0
570	Bacteria	Firmicutes	Clostridia	Lachnospirales	Lachnospiraceae	uncultured	uncultured_Eubacterium	0	0.000214506	0.000228467	0	0	0	0	0.000124394	0.000245243	0	0.000219534	0	0.000421417	0.000135336	7.20838e-05	0	0	0	0.000186569	0.000147835	0	0.000134342	0	0.00101031	0.000170612	0	0.000278556	0.000329128	0	0.000118684	0.000189101	0.000868143	0.000198695	0	0	0	0	0	0	0	0	0.000153791
571	Bacteria	Firmicutes	Clostridia	Lachnospirales	Lachnospiraceae	uncultured	uncultured_organism	0	0	0.000564448	0	0	0	0	0	0	0	0	0	0	0.00193531	0	0	0	0	0	0.00853221	0	0	0	0	0	0.000809867	0	0	0.000235592	0	0.00349838	0.00143577	0.002904	0	0	0	0	0	0.0103817	0.00015385	0.000322349	0
572	Bacteria	Firmicutes	Clostridia	Monoglobales	Monoglobaceae	Monoglobus	unidentified	0.00158711	0	0	0	2.7702e-05	0	0	0	0	0	0.000125448	0	0	0	0.000126147	0	0	0	0	0	0	0	0	0	0.0002417	0	0	0	0	0	0	0	0	6.26103e-05	0	0	0	0	0	0	0	0
573	Bacteria	Firmicutes	Clostridia	Monoglobales	Monoglobaceae	Monoglobus	uncultured_Clostridiaceae	0	0	0	0	6.9255e-05	0	0	0.000124394	0	0	0	0	6.65395e-05	0.000175937	0	0	0	0	0	0	0	0	0	0	0	0	0	0	0	0	0	0	0	0.000176447	0	0	0	0	0	0	0	0
574	Bacteria	Firmicutes	Clostridia	Monoglobales	Monoglobaceae	Monoglobus	uncultured_Clostridiales	0	0	0	0	0	0	0	0.000604197	0	0	0	0	0	0	0	0	0	0	0	0	0	0.000656785	0	0	0	0	0	0	0	0	0	0	0	0	0	0	0	0	0	0	0	0
575	Bacteria	Firmicutes	Clostridia	Monoglobales	Monoglobaceae	Monoglobus	uncultured_Clostridium	0	0	0	0	0	0	0	0	0	0	0	0	0	0	0	0	0	0	0	0	0	0	0	0	0	0	0	0	0	0.000148355	0	0	0	0	0	0	0	0	0	0	0	0
576	Bacteria	Firmicutes	Clostridia	Monoglobales	Monoglobaceae	Monoglobus	uncultured_Firmicutes	0	0	0	0	0	0	0	0	1.98845e-05	0	0	0.00106496	0	0	0	0	0	0	0	0	0	0	0	0	0	0	0	0	0	0	0	0	0	0	0	0	0	0	0	0	0	0
577	Bacteria	Firmicutes	Clostridia	Monoglobales	Monoglobaceae	Monoglobus	uncultured_Ruminococcaceae	0	0	0	0	0	0	0	0	0	0	0	0	0	0	0	0	0	0	0	0	8.53206e-05	0	0	0	0	0	0	0	0	0	0	0	0	0	0	0	0	0	0	0	0	0
578	Bacteria	Firmicutes	Clostridia	Monoglobales	Monoglobaceae	Monoglobus	uncultured_bacterium	0	0	0	0	0.00236852	0	0	0.00126171	0.000258499	0	0	0.00557057	0.000421417	0	0	0.000359181	0	0	0.000251868	0	0	0.000149269	0	0	0	0	0	0.000932529	0	0	0.00230073	0	0	0	0.000236636	0.000553672	0	0	0	0.000923097	0	0
579	Bacteria	Firmicutes	Clostridia	Monoglobales	Monoglobaceae	Monoglobus	uncultured_organism	0.00113946	0.00608661	0.00198901	0.00224159	0.000249318	0.00392877	0.000559853	0.00360741	0.000318153	0.00504887	0.00413979	0.00753666	0	0.000541345	0.000919068	0.00127709	0.000661862	0	0.000690305	0.000253432	0.000597244	5.97077e-05	0.000102462	0	7.10884e-05	0.000464678	0.000835669	0.00126166	0	0.0130849	0.00100854	0.00233731	0.00108518	0.00552109	0.0013015	0.000461393	0.000705265	0.00550357	0.00465434	0.00507703	0.000297553	0.000341758
580	Bacteria	Firmicutes	Clostridia	Monoglobales	Monoglobaceae	Monoglobus	uncultured_rumen	0	0	0	0	0	0	0	0	0	0	0	0	0	0	0	0	0	0	0	0	0	0	0	0	0	0	0	0	0	0	0	0	0	0	0	0	0	0	0	0	0	0
581	Bacteria	Firmicutes	Clostridia	Oscillospirales	unidentified	unidentified	unidentified	0	0	0	0.000178906	0	0	0	0.00033764	0.000914689	0	0	0	0.000643215	0.00014887	7.20838e-05	0.000305969	0	0	0	0	0	5.97077e-05	0.000278111	0	0	6.63825e-05	0.000261147	0	0	0	0	0	0	0	0	0	0	0	0	0	0	0
582	Bacteria	Firmicutes	Clostridia	Oscillospirales	Butyricicoccaceae	unidentified	unidentified	0	0	0	0	0	0	0	0	9.27945e-05	0	0	0	0.00115335	0	0	6.6515e-05	0	0	0	0	0.000341282	7.46347e-05	0	0	0	0	0	0	0	0	0	0	0	0.00140019	0	0	0	0	0	0.000131871	0	0
583	Bacteria	Firmicutes	Clostridia	Oscillospirales	Butyricicoccaceae	Butyricicoccus	unidentified	0	0	0.00149176	0.00697733	0.000609444	0.00440927	0	0.00110177	0.000570023	0.000647291	0.00192354	0	2.21798e-05	0.000324807	0	0.000971119	0.000857969	0	0.000475751	0.000739176	0.00127981	0.000403027	0.000351298	0.00316562	0.00183408	0.00201803	0.00146242	0.000603401	0.000334788	0	0.00179646	0	0.00114632	0.000193523	0.000970208	0.00103813	0.00187586	0.00139464	0.00144926	0	0.00381859	0.000905658
584	Bacteria	Firmicutes	Clostridia	Oscillospirales	Butyricicoccaceae	Butyricicoccus	Agathobaculum_butyriciproducens	0	0	0	0	0	0	0	0	0	0	0	0	0	0	0	0	0	0	0	0	0	0	0	0	0	0	0	0	0	0	0	0	0	0	0	0	2.18123e-05	0	0	0	0.00012398	0
585	Bacteria	Firmicutes	Clostridia	Oscillospirales	Butyricicoccaceae	Butyricicoccus	Butyricicoccus_pullicaecorum	0	0	0	0	0	0.00141323	0	0	0	0	0	0	0	0	0	0	0	0.00896879	0	0	0	0	0	0	0	0	0	0	0.000247991	0	0	0	0	0	0	0	0	0	0	0	0	0
586	Bacteria	Firmicutes	Clostridia	Oscillospirales	Butyricicoccaceae	Butyricicoccus	Butyricicoccus_sp.	0	0	0	0	0	0	0	0	0	0	0	0	0	0	0	0	0	0	0	0	0	0	0	0	0	0	0	0	0	0	0	0	0	0	0	0	0	0	0	0	0	0
587	Bacteria	Firmicutes	Clostridia	Oscillospirales	Butyricicoccaceae	Butyricicoccus	bacterium_NLAE-zl-H60	0	0	0	0	0	0	0	0	0	0	0	0	0	0	0	0	0	0	0	0	0	0	0	0	0	0	0	0	0	0	0	0	0	0	0	0	0	0	0	0	0	0
588	Bacteria	Firmicutes	Clostridia	Oscillospirales	Butyricicoccaceae	Butyricicoccus	uncultured_Firmicutes	0	0	0	0	0	0	0	0	0	0	0	0	0	0	0	0	0	0	0	0	0	0	0	0	0	0	0	0	0	0	0	0	0	0	0	0	0	0	0	0	0	0
589	Bacteria	Firmicutes	Clostridia	Oscillospirales	Butyricicoccaceae	Butyricicoccus	uncultured_bacterium	0.00337769	0.000348572	0	0	0.00124659	0.00062182	0.00113667	0	0.00221381	0.00854424	0.0012963	0.00131072	0	0.000920287	0.000414482	0	0	0	0.00113807	0.000760296	0.00136513	0.000940397	0.00102462	0	0	0.000597443	0.00477028	0	0.00198393	0.00213631	0	0.000868143	0.00269002	0.000273208	0.00336023	0	0	0.000239938	0	0	0.000867862	0.000751867
590	Bacteria	Firmicutes	Clostridia	Oscillospirales	Butyricicoccaceae	Butyricicoccus	uncultured_organism	0	0	0	0	0	0	0	0	0	0	0	0	0	0	0	0	0	0	0	0.000126716	0	0	0	0	0	0	0	0	0	0	0	0	0	0	0	0	0	0	0	0	0	0
591	Bacteria	Firmicutes	Clostridia	Oscillospirales	Butyricicoccaceae	UCG-008	uncultured_bacterium	0	0	0	0	0	0	0	0	0	0	0	0	0	0	0	0	0	0	0	0	0	0	0	0	0	0	0	0	0	0	0	0	0	0	0	0	0	0	0	0	0	0
592	Bacteria	Firmicutes	Clostridia	Oscillospirales	Butyricicoccaceae	UCG-008	uncultured_organism	0	0	0	0	0	0	0	0	0	0	0	0	0	0	0	0	0	0	0	0	0	0	0	0	0	0	0	0	0	0	0	0	0	0	0	0	0	0	0	0	0	0
593	Bacteria	Firmicutes	Clostridia	Oscillospirales	Butyricicoccaceae	UCG-009	unidentified	0	0	0	0.00135758	0.000249318	0	0	0	0	0.000215764	0	0	0.000133079	0	0	9.3121e-05	0	0	0	0	0	0.00019405	0.000292749	0	0	0	0	0	0	0.000296709	0	0	0.000932337	0	0	0.000322975	0	0	0	6.59355e-05	0	0.000256318
594	Bacteria	Firmicutes	Clostridia	Oscillospirales	Butyricicoccaceae	UCG-009	uncultured_bacterium	0	0	0	0	0	0	0	0.000319869	0	0	0	0	0	0	0	0	0	0	0	0	0	0.000238831	0	0	0	9.29356e-05	0	0	0	0	0.000189101	0	0	0.000239057	0	0	0	0	0	0	0	0
595	Bacteria	Firmicutes	Clostridia	Oscillospirales	Butyricicoccaceae	UCG-009	uncultured_organism	0	0	0	0	0	0	0	0	0	0	0	0	0	0	0	0	0	0	0	0	0	0	0	0	0	0	0	0	0	0	0	0	0	0	0	0	0	0	0	0	0	0
596	Bacteria	Firmicutes	Clostridia	Oscillospirales	Butyricicoccaceae	uncultured	uncultured_bacterium	0	0	0	0	0	0	0	0	0	0	0	0	2.21798e-05	0	0	0	0	0	0	0	0	0	0	0	0	0	0	0	0	0	0	0	0	0	0	0	0	0	0	0	0	0
597	Bacteria	Firmicutes	Clostridia	Oscillospirales	Ethanoligenenaceae	Acetanaerobacterium	uncultured_rumen	0	0	0	4.20955e-05	0	0	0	0	0	0	0	0	0	0	0	0	0	0	0	0	0	0	0	0	0	0	0	0	0	0	0	0	0	1.70755e-05	0	0	0	0	0	0	0	0
598	Bacteria	Firmicutes	Clostridia	Oscillospirales	Oscillospiraceae	unidentified	unidentified	0	0	0.000282224	0.00148387	0.00163442	0	0.000135722	0.000142164	0	0	0.000491339	0.00147456	0.00530098	0	0.00104521	0.000186242	0.000294161	0	0.000457094	0.000274551	0	0.00159718	0	0	0.00142177	0	0.00325563	0.000932529	0	0	0.000598821	0	0.00125331	0.00190677	0	0.00170715	0.000181769	0.000134965	0	0.00441768	0	0.00088857
599	Bacteria	Firmicutes	Clostridia	Oscillospirales	Oscillospiraceae	Colidextribacter	unidentified	0.00174989	0	0.000147832	0.00111553	0	0	0	0	0	0	0.000794505	0	0	0.000554879	0	0.000159636	0	0	9.32845e-05	0.00673706	0	0	0.000117099	0	0.000298571	0	0.000226327	0	0.000706775	0	0	0.0110855	0.000657221	0.0022312	0.000402281	0	0.000443517	0.00142463	0.00751104	0	0	0.00023923
600	Bacteria	Firmicutes	Clostridia	Oscillospirales	Oscillospiraceae	Colidextribacter	Anaerostipes_hadrus	0	0	0	0	0	0	0	0	0	0	0.00010454	0	0	0	0	0	0	0	0	0	0	0	0	0	0	0	0	0	0	0	0	0	0	0	0	0	0	0	0	0	0	0
601	Bacteria	Firmicutes	Clostridia	Oscillospirales	Oscillospiraceae	Colidextribacter	Clostridiales_bacterium	0	0	0	0	0	0	0	0	0	0	0	0	0	0	0	0	0	0	0	0	0	0	0	0	0	0	0	0	0	0	0	0	0	0	0	0	0	0	0	0	0	0
602	Bacteria	Firmicutes	Clostridia	Oscillospirales	Oscillospiraceae	Colidextribacter	Colidextribacter_massiliensis	0	0	0	0	0	0	0	0	0	0	0	0	0.000354877	0	0	0	0	0	0	0	0	8.95616e-05	0	0	0	0	0	0	0	0	0	0	0	0	0	0	0	0	0	0	0	0
603	Bacteria	Firmicutes	Clostridia	Oscillospirales	Oscillospiraceae	Colidextribacter	gut_metagenome	0	0	0	0	0	0	0	0	0	0	0	0	0	0	0	0	0	0	0	0.000781415	0	0	0	0	0	0	0	0	0	0	0	0	0	0	0	0	0	0	2.78703e-05	0	0	0
604	Bacteria	Firmicutes	Clostridia	Oscillospirales	Oscillospiraceae	Colidextribacter	uncultured_Clostridia	0	0	0	0	0	0	0	0.000675279	0	0	0	0	0.000354877	0	0	0	0	0	0	0	0	0	0	0	0.000668231	0	0	0	0	0	0.000283652	0	0	0	0	0	0	0	0	0	0	0
605	Bacteria	Firmicutes	Clostridia	Oscillospirales	Oscillospiraceae	Colidextribacter	uncultured_Clostridiales	0	0	0	0	0	0	0	0.000319869	0	0	0	0	0	0	0	0	0	0	0	0	0	0	0	0	0	0	0	0	0	0	0	0	0	0	0	0	0	0	0	0	0	0
606	Bacteria	Firmicutes	Clostridia	Oscillospirales	Oscillospiraceae	Colidextribacter	uncultured_bacterium	0	0	0	0	0	0	0	0.000266558	0	0	0	0	0	0	0	0	0	0.000108221	0	0	0	0	0	0	0	0.000331913	0	0	0	0	0	0	0	0.000905003	0	0	0	0.00133465	0	0	0	0
607	Bacteria	Firmicutes	Clostridia	Oscillospirales	Oscillospiraceae	Colidextribacter	uncultured_organism	0	0	0.00129017	0	0.00182833	0	0.000203583	0	0.000225358	0.000582562	0.00214307	0.00294913	0	0.0016511	0	0.000199545	0.000465755	0	0.00103546	0.000274551	0.000810546	0.000507516	0.000995345	0.00121237	0	7.96591e-05	0	0.00235875	0	0.000296709	0.00040972	0	0.000886484	0	0.00137249	0.00062288	0	0	0	0.00114288	0.00181011	0.000546812
608	Bacteria	Firmicutes	Clostridia	Oscillospirales	Oscillospiraceae	Flavonifractor	unidentified	0.000732511	0.00774903	0.000712279	0.00130496	0.00041553	0.024788	0.000135722	0	9.27945e-05	0.000258916	0.000595879	0	0.00290556	0.000433076	0	0.000252757	0	0.0144339	0	0.0100106	0	0.000283612	0	0	0.00209	0	0.000208917	0	0.000743974	0.000474735	0.0024268	0.0109853	0.00279701	0.00341511	0	0.000438323	0.00125057	0.0019345	0.00482156	0.000219785	0	0.000478461
609	Bacteria	Firmicutes	Clostridia	Oscillospirales	Oscillospiraceae	Flavonifractor	uncultured_bacterium	0	0.000482638	0	0	0	0	0	0	0.000304896	0.000345222	0	0	0	0	0	0	0	0	0	0	0	0	0	0	0	0	0	0	0.000396786	0	0	0	0	0	0.000165645	0	0	0.000629836	0.000278703	0	0	0.000461373
610	Bacteria	Firmicutes	Clostridia	Oscillospirales	Oscillospiraceae	Intestinimonas	unidentified	0	0	0	0	0	0	0	0.000302099	0	0	0	0	0.000155259	0	0	0.00066515	0	0	0	0	0	0	0	0	0	0	0	0	0	0	0	0	0	0	0	0	0	0	0	0	0	0
611	Bacteria	Firmicutes	Clostridia	Oscillospirales	Oscillospiraceae	Intestinimonas	Intestinimonas_butyriciproducens	0.000488341	0	0.000147832	0.00051567	0	0.000282646	0	0.000142164	0.000304896	0	0.000710873	0	0.000266158	0	0	0	0	0	0	0.000211193	0	0	0	0	7.10884e-05	0.000159318	0	0	0	0	0.000252135	0.00183646	0	0.00043258	0	0	0	0	0.000376249	0	0	0.000119615
612	Bacteria	Firmicutes	Clostridia	Oscillospirales	Oscillospiraceae	Intestinimonas	Intestinimonas_timonensis	0	0	0	0	0	0	0	0	0	0	0	0	0	0	0	0	0	0	0	0	0	0	0	0	0	0.000451401	0	0	0	0	0	0	0	0.000796858	0	0	0	0.000464879	0	0	0	0
613	Bacteria	Firmicutes	Clostridia	Oscillospirales	Oscillospiraceae	Intestinimonas	uncultured_Clostridiales	0	0	0	0.000115763	0	0	0	0	0	0	0	0	0.000155259	0	0	0	0	0	0	0	0	0	0.000175649	0	0	9.29356e-05	0	0	0	0	0	0	0	0	0	0	0	0.000239938	0	0	0	0
614	Bacteria	Firmicutes	Clostridia	Oscillospirales	Oscillospiraceae	Intestinimonas	uncultured_bacterium	0	0	0.000779476	0	0	0	0	0	6.62818e-05	0	0	0	0	0	0.000270314	0	0	0	0	0	0	0	0	0	0	0	0	0	0	0	0	0	0	0	0	0	0	0	0	0	0	0
615	Bacteria	Firmicutes	Clostridia	Oscillospirales	Oscillospiraceae	Intestinimonas	uncultured_organism	0	0	0	0	0	0	0	0	0	0	0	0	0	0	0	0	0	0	0	0	0	0	0	0	0	0	0	0	0	0	0	0	0	0	0	0	0	0	0	0	0	0
616	Bacteria	Firmicutes	Clostridia	Oscillospirales	Oscillospiraceae	NK4A214_group	unidentified	0.000732511	0	0	0.00364126	0	0	0	0.00106623	0	0	0	0.00270337	0.000598856	0	0.00182011	0.000771574	0	0	0.00154852	0	0.00183439	0.00189572	0.00102462	0.00356974	0	0	0.00894862	0.000987383	0	0.00124618	0.00406568	0	0	0.0011896	0	0	0	0	0	0.00230774	0	0.000427197
617	Bacteria	Firmicutes	Clostridia	Oscillospirales	Oscillospiraceae	NK4A214_group	gut_metagenome	0.00016278	0	0	0	0	0	0	0.00222131	0	0	0	0	0.000465777	0	0.000234272	0	0	0	0.00017724	0	0.000469263	0	0	0	0	0	0.00078344	0	0	0	0.00516877	0	0	0	0	0	0	0	0	0.00101101	0	0
618	Bacteria	Firmicutes	Clostridia	Oscillospirales	Oscillospiraceae	NK4A214_group	metagenome	0	0	0	0.00399907	0.00295026	0	0.00120453	0.000995149	0.0043746	0.00923469	0	0.00745474	0.000243978	0.00914873	0.00057667	0.0131567	0.000171594	0	0.00029851	0	0.000853206	0.00473184	0.00392283	0	0.00764911	0.00278807	0.000191508	0.000109709	0	0.0110376	0	0	0.00669448	0.00583983	0.00203507	0.00634415	0	0.00170956	0	0.00789028	0.000743882	0.00321252
619	Bacteria	Firmicutes	Clostridia	Oscillospirales	Oscillospiraceae	NK4A214_group	uncultured_Clostridiales	0	0	0	0	0	0	0	0	0	0	0	0	0	0	0	0	0	0	0	0	0	0	0	0	0	0	0	0	0	0	0	0	0	6.83021e-05	0	0	0	0	0	0	0	0
620	Bacteria	Firmicutes	Clostridia	Oscillospirales	Oscillospiraceae	NK4A214_group	uncultured_bacterium	0	0	0	0	0	0	0	0	0	0	0	0	0	0	0	0	0	0	0	0	0	0	0	0	0	0	0	0	0	0	0	0	0	0	0	0	0	0	0	0	0	0
621	Bacteria	Firmicutes	Clostridia	Oscillospirales	Oscillospiraceae	NK4A214_group	uncultured_organism	0	0	0	0	0	0	0	0.00261227	0	0	0	0	0	0	0	0	0	0	0	0	0	0	0	0	0	0.000292083	0	0	0	0	0	0	0	0	0	0	0	0	0	0	0	0
622	Bacteria	Firmicutes	Clostridia	Oscillospirales	Oscillospiraceae	NK4A214_group	uncultured_rumen	0	0	0	0	0.00027702	0	0	0.00303876	0	0	0	0.00180224	0.000310518	0	0.00178407	0	0	0	0.000335824	0	0.000725225	0.00101503	0	0	0	0	0	0	0	0	0.00271045	0	0	0	0	0.000599811	0	7.49805e-05	0	0.00120882	0	0
623	Bacteria	Firmicutes	Clostridia	Oscillospirales	Oscillospiraceae	NK4A214_group	unidentified_rumen	0	0	0	0	0	0	0	0	0	0	0	0	0	0	0	0	0	0	0	0	0	0	0	0	0	0	0	0	0	0	0	0	0	0	0	0	0	0	0	0	0	0
624	Bacteria	Firmicutes	Clostridia	Oscillospirales	Oscillospiraceae	Oscillibacter	unidentified	0.000895292	0.000804397	0.000564448	0.00089453	0.000193914	0.000650085	0	0.000159935	0.000762241	0.00107882	0.000574971	0	0.000399237	0.000960888	0	0.000917907	0	0	0.000578364	0.00209081	0	8.95616e-05	0.000146374	0	0.000682448	0.00053106	0.000383015	0	0	0.000445064	0	0.00210358	0.00123802	0.000836701	0	0	0	0.00236938	0.00582489	0.000197807	0	0.000256318
625	Bacteria	Firmicutes	Clostridia	Oscillospirales	Oscillospiraceae	Oscillibacter	Oscillibacter_sp.	0	0	0	0	0	0	0	0	0	0	0	0	0	0	0	0	0	0	0	0	0	0	0	0	0	0	0	0	0	0	0	0	7.6421e-05	0	0	0	0	0	0	0	0	0
626	Bacteria	Firmicutes	Clostridia	Oscillospirales	Oscillospiraceae	Oscillibacter	gut_metagenome	0	0	0	0	0	0	0	0	0	0	0	0	2.21798e-05	0	0	0	0	0	0.000102613	0	0	0	0	0	0	0	0	0	0	0	0	0	0	0	0	0	0	0	0	0	0	0
627	Bacteria	Firmicutes	Clostridia	Oscillospirales	Oscillospiraceae	Oscillibacter	metagenome	0	0	0	0	0	0	0	0	0	0	0	0	0.000354877	0	0	0	0	0	0	0	0	0.000253758	0.000102462	0	0	0	0	0	0	0	0	0	0	0	0	0	0	0.000149961	0	0.000263742	0	0.000136703
628	Bacteria	Firmicutes	Clostridia	Oscillospirales	Oscillospiraceae	Oscillibacter	uncultured_Clostridiales	0	0	0	0	0	0	0	0	0	0	0	0	0	0	0	0	0	0	0	0	0	0	0	0	0	0	0	0	0	0	0	0	0	0	0	0	0	0.000224942	0	0	0	0
629	Bacteria	Firmicutes	Clostridia	Oscillospirales	Oscillospiraceae	Oscillibacter	uncultured_bacterium	0	0	0	0	0.000429381	0	0	0.00101292	0	0	0	0	0.000110899	0	0	0	0	0	0.000158584	0	0.000682565	0.00053737	0.000336661	0	0	0	0	0.000767965	0	0	0.000441237	0	0	0.000318743	0	0.00177636	0	0	0	0	0	0.000905658
630	Bacteria	Firmicutes	Clostridia	Oscillospirales	Oscillospiraceae	Oscillibacter	uncultured_organism	0.00272657	0.0175359	0.00130361	0.00162068	0.000900314	0.00706614	0.000152687	0.00403391	0.0016703	0.000690444	0.00309439	0.00786434	0.00210708	0.00219245	0	0.00270051	0	0	0.00162315	0.0155227	0.00106651	0.000149269	0.000614772	0.00222267	0.00432217	0.00313326	0.000905308	0.00389468	0	0.00397591	0.00605125	0.00824735	0.00314855	0.00926063	0.00132516	0.000922786	0.000247206	0.0104823	0.0152032	0.000637377	0	0.000580988
631	Bacteria	Firmicutes	Clostridia	Oscillospirales	Oscillospiraceae	Oscillospira	unidentified	0	0	0	0	0	0	0	0	0	0	0	0	0	0	0	0	0	0	0	0	0	0	0	0	0	0	0	0	0	0	0.000567304	0	0	0	0	0	0	0	0	0	0	0
632	Bacteria	Firmicutes	Clostridia	Oscillospirales	Oscillospiraceae	Oscillospira	uncultured_bacterium	0.000366256	0	0.000120953	0.000221001	0.000221616	0.00276993	0	0.000319869	0	0	0.00163083	0	0	0.000230072	0	0.000505514	0	0	0	0.00225977	0.000725225	0	0.000409848	0	5.68707e-05	0	0.000121868	0	0	0	0.000945507	0	6.11368e-05	0.00182139	0	0.000138418	0	0.000569852	0	0.000307699	0	0
633	Bacteria	Firmicutes	Clostridia	Oscillospirales	Oscillospiraceae	Oscillospira	uncultured_organism	0	0	0	0	0	0	0	0.000302099	0	0	0	0	0	0	0	0	0	0	0	0	0	0	0	0	0	0	0	0	0	0	0.000346686	0	0	0	0	0	0	0	0	0.000197807	0	0
634	Bacteria	Firmicutes	Clostridia	Oscillospirales	Oscillospiraceae	Oscillospiraceae	uncultured_rumen	0	0	0	0	0	0	0	0	0	0	0	0	0	0	0	0	0	0	0	0	0	0	0	0	0	0	0	0	0	0	0	0	0	3.41511e-05	0	0	0	0	0	0	0	0
635	Bacteria	Firmicutes	Clostridia	Oscillospirales	Oscillospiraceae	Papillibacter	uncultured_bacterium	0	0	0	0	0	0	0	0	0	0	0	0	4.43597e-05	0	0	0	0	0	0	0	0	0	0	0	0	0	0	0	0	0	0	0	0	7.96858e-05	0	0	0	0	0	0	0	0
636	Bacteria	Firmicutes	Clostridia	Oscillospirales	Oscillospiraceae	Pseudoflavonifractor	uncultured_bacterium	0	0	0	0.000178906	0	0	0	0	0	0	0	0	0	0	0	0	0	0	0	0.000295671	0	0	0	0	0	0	0	0	0	0	0	0.000500851	0	0.000250441	0	0	0.000123603	0	0.000627082	0	0	0
637	Bacteria	Firmicutes	Clostridia	Oscillospirales	Oscillospiraceae	UCG-002	unidentified	0.0205103	0.00927738	0.0238815	0.011029	0.00430766	0	0.000593784	0.0212358	0.00655527	0.000884631	0.00211171	0.00983043	0.0434503	0.00396535	0.012921	0.00482899	0.00149532	0	0.00653924	0	0.00563116	0.0109564	0.0176527	0	0.0262032	0.00586822	0.0278556	0.0083379	0	0.00356051	0.0267263	0.00507529	0.0107295	0.00021629	0.00619986	0.0056982	0	0.00829284	0	0.0239566	0	0.00316126
638	Bacteria	Firmicutes	Clostridia	Oscillospirales	Oscillospiraceae	UCG-002	gut_metagenome	0	0	0	0	0	0	0	0	0	0	0	0	0	0	0	0	0	0	0	0	0	0	0	0	0	0	0	0	0	0	0	0	0	0	0	0	0	0	0	0	0	0
639	Bacteria	Firmicutes	Clostridia	Oscillospirales	Oscillospiraceae	UCG-002	uncultured_Firmicutes	0	0	0	0	0	0	0	0	0	0	0	0	4.43597e-05	0	0	0	0	0	0	0	0	0	0	0	0	0	0	0	0	0	0	0	0	0	0	0	0	0	0	0	0	0
640	Bacteria	Firmicutes	Clostridia	Oscillospirales	Oscillospiraceae	UCG-002	uncultured_bacterium	0	0	0	0	0	0	0	0	0	0	0	0	4.43597e-05	0	0.00138761	0	0	0	0	0	0	0	0	0	0	0	0	0	0	0	0	0	0	0	0	0	0	0	0	0.000109893	0	0
641	Bacteria	Firmicutes	Clostridia	Oscillospirales	Oscillospiraceae	UCG-002	uncultured_marine	0	0	0	0	0	0	0	0	0	0	0	0	0	0	0	0	0	0	0	0	0	0	0	0	0	0	0	0	0	0	6.30338e-05	0	3.05684e-05	0	0	0	0	0	0	0	0	0
642	Bacteria	Firmicutes	Clostridia	Oscillospirales	Oscillospiraceae	UCG-002	uncultured_organism	0.0106214	0	0.0097972	0.00392541	0.00688394	0	0.00398683	0.00758801	0.0100218	0.00869528	0.00915772	0.00516097	0.000998093	0.0115036	0.00897443	0.0136755	0.00590773	0	0.00339555	0	0.00511924	0.0107474	0.00922158	0.031993	0.0112035	0.00241632	0.00637198	0.0189248	0	0.0281874	0	0.012922	0.0348786	0.00142296	0.017866	0.0129421	0	0.0190301	0	0.00793424	0.00109103	0.0346884
643	Bacteria	Firmicutes	Clostridia	Oscillospirales	Oscillospiraceae	UCG-002	uncultured_rumen	0.00720303	0	0.0155761	0.00273621	0.00186988	0	0	0.0036785	0.00554116	0	0.00314666	0.0100762	0.00421417	0	0.000792921	0	0.00227975	0	0.000615677	0	0.00260228	0.00255251	0.00348371	0.000269415	0	0.0223311	0.0058845	0	0	0	0.0255917	0	0	0	0	0.00262994	0	0.00125967	0	0.00967054	0.000198368	0.000871482
644	Bacteria	Firmicutes	Clostridia	Oscillospirales	Oscillospiraceae	UCG-003	unidentified	0.000651121	0.000563078	0.00165303	0	0.00084491	0	0.000458062	0.000462033	0.0017631	0.00558828	0.00373208	0.0149095	0	0.00162404	0	0.000625241	0.00485365	0	0.0051493	0.000337909	0.000341282	0.00277641	0.00185895	0.0134034	0	0	0	0.00186506	0	0.00228466	0.000630338	0	0.00539533	0.0013262	0.00165645	0.00122269	0.000174498	0	0	0.00189015	0.00208287	0.00189676
645	Bacteria	Firmicutes	Clostridia	Oscillospirales	Oscillospiraceae	UCG-003	Marseillibacter_massiliensis	0	0	0	0	0	0	0	0	0	0	0	0	0	0	0	0	0	0	0	0	0	0	0	0	0	0	0	0	0	0	0	0	0	0	0	0	0	0	0	0	0	0
646	Bacteria	Firmicutes	Clostridia	Oscillospirales	Oscillospiraceae	UCG-003	gut_metagenome	0	0	0	0	0	0	0	0	0	0	0	0	0	0	0	0	0	0	0	0	0	0	0	0	0	0	0	0	0	0	0	0	0	0	0	0	0	0	0	0	0	0
647	Bacteria	Firmicutes	Clostridia	Oscillospirales	Oscillospiraceae	UCG-003	metagenome	0	0	0	0	0	0	0	0	0	0	0	0	0	0	0	0	0	0	0	0	0	0	0	0	0	0	0	0	0	0	0	0	0	0	0	0	0	0	0	0	0	0
648	Bacteria	Firmicutes	Clostridia	Oscillospirales	Oscillospiraceae	UCG-003	uncultured_bacterium	0	0	0.000416616	0	0.000900314	0	0	0	0.000311524	0	0.000543609	0	0	0	0	0.000585332	0	0	0.00302242	0.000401267	0.000682565	0	0	0.00505153	0	0	0	0	0	0.000830787	0	0	0.00113103	0.000352894	0.000733572	0	5.08954e-05	0	0	0	0	0.00136703
649	Bacteria	Firmicutes	Clostridia	Oscillospirales	Oscillospiraceae	UCG-003	uncultured_organism	0	0	0	0.0060828	0.00232697	0	0.00105185	0.00136833	0.000961086	0.0127085	0.000972224	0	4.43597e-05	0.00150223	0.000648754	0.00603956	0.00333382	0	0.00346085	0.00285111	0.00251696	0.00316451	0.00327878	0.00532094	0	0	0.0055189	0.00718596	0	0	0.00160736	0.0175966	0.00920109	0	0.00437777	0.00292985	0	8.99766e-05	0	0.00441768	0.00309951	0.00283659
650	Bacteria	Firmicutes	Clostridia	Oscillospirales	Oscillospiraceae	UCG-005	unidentified	0.00227892	0	0.00233843	0	0.00155131	0	0	0.0019903	0.000178961	0.000884631	0.000355437	0.00188416	0.0102693	0	0.0416464	0.00337896	0.000441241	0	0.00150188	0.00337909	0.00383943	0.00715	0.00519629	0	0.000497619	0.00411572	0.00558854	0.00082282	0	0	0.00538939	0.00010017	0.00385162	0.000660254	0.000236636	0.00445244	0	0.00484374	0	0.00589024	0	0.00228978
651	Bacteria	Firmicutes	Clostridia	Oscillospirales	Oscillospiraceae	UCG-005	gut_metagenome	0.000569731	0.00321759	0.000846672	0.000210478	0.000166212	0	0	0	0.000682702	0	0	0	0.00403673	0.00288266	0.0019823	0	0	0	0.000578364	0	0.000170641	0	0.000658684	0	0	0.000238977	0.000870489	0	0	0.00142421	0	0	0	0	0.0018221	0.00138418	0	0	0.00100333	0	0	0.00234104
652	Bacteria	Firmicutes	Clostridia	Oscillospirales	Oscillospiraceae	UCG-005	human_gut	0	0	0	0	0	0	0	0	0	0	0	0	2.21798e-05	0	0	0	0	0	0	0	0	0	0	0	0	0	0	0	0	0	0	0	0	0	0	0	0	0	0	0	0	0
653	Bacteria	Firmicutes	Clostridia	Oscillospirales	Oscillospiraceae	UCG-005	metagenome	0	0	0	0.000799815	0	0	0	0	0	0	5.22701e-05	0	0.000598856	0	0	0	0	0	9.32845e-05	0	0	0	0	0	0	9.29356e-05	0	0	0	0	0	0	0	0	0	0	0	0.000104973	0	0	0	0
654	Bacteria	Firmicutes	Clostridia	Oscillospirales	Oscillospiraceae	UCG-005	uncultured_Clostridiales	0	0	0	0	0	0	0	0	0	0	0	0	0	0	0	0	0	0	0	0	0	0.000268685	0.000131737	0	0	6.63825e-05	0	0	0	0	0	0	0	0	0	0	0	0	0	0	0	0
655	Bacteria	Firmicutes	Clostridia	Oscillospirales	Oscillospiraceae	UCG-005	uncultured_Ruminococcaceae	0	0	0	0	0	0	0	0	0	0	0	0	0	0	0	0	0	0	0.000466422	0	0	0.000552297	0	0	0	0	0	0	0	0	0	0	0	0	0	0	0	0	0	0	0	0
656	Bacteria	Firmicutes	Clostridia	Oscillospirales	Oscillospiraceae	UCG-005	uncultured_bacterium	0	0	0	0	0.000803357	0	0	0	0	0.00131616	0	0	0.000133079	0	0.00371231	0	0.00139726	0	0	0	0	0.000761274	0.00251764	0	0	0	0	0	0	0	0	0	0	0	0	0.000207627	0	0	0	0.000703312	0	0
657	Bacteria	Firmicutes	Clostridia	Oscillospirales	Oscillospiraceae	UCG-005	uncultured_organism	0.00138363	0	0.000255345	0.00254678	0.00326883	0	0.000916124	0.00556217	0.00217404	0.000841478	0.000125448	0.00860162	0.0247749	0.0136284	0.00913662	0.00655838	0.00159337	0	0.00282652	0	0.00255962	0.00303017	0.00538657	0	0.00129381	0.00493886	0.00840892	0.00148108	0	0.000445064	0.0048536	0.000200341	0.0060984	0.00334111	0	0.00309133	0	0	0	0.00283523	0	0.00252901
658	Bacteria	Firmicutes	Clostridia	Oscillospirales	Oscillospiraceae	UCG-005	uncultured_rumen	0	0	0	0.000526194	0	0	0	0.000248787	0	0	0	0	0.00197401	0	0	0	0	0	0	0	0	0	0.000380573	0	0	0	0.000261147	0	0	0	0.000472754	0	0	0	0	0	0	0	0	0.000527484	0	0
659	Bacteria	Firmicutes	Clostridia	Oscillospirales	Oscillospiraceae	UCG-005	wallaby_gut	0	0	0	0	0	0	0	0	0	0	0	0	0	0	0.000144168	0	0	0	0	0	0	0	0	0	0	0	0	0	0	0	0	0	0	0	0	0	0	0	0	0	0	0
660	Bacteria	Firmicutes	Clostridia	Oscillospirales	Oscillospiraceae	UCG-007	unidentified	0	0	0	0	0	0	0	0	0	0	0	0	0	0	0	0	0	0	0	0	0	0	0	0	0	0	0	0	0	0	0	0	0	0	0	0	0	0	0	0	0	0
661	Bacteria	Firmicutes	Clostridia	Oscillospirales	Oscillospiraceae	UCG-007	uncultured_bacterium	0	0	0	0	0	0	0	0.000106623	0	0	0	0	0	0	0	0	0	0	0	0	0	0	0	0	0	0	0	0	0	0	0	0	0	0	0	0	0	0	0	0	0	0
662	Bacteria	Firmicutes	Clostridia	Oscillospirales	Oscillospiraceae	UCG-007	uncultured_rumen	0	0	0	8.4191e-05	0	0	0	0	0	0	0	0	0	0	0	0	0	0	0	0	0	0	0	0	0	0	0	0	0	0	0	0	0	0	0	0	0	0	0	0	0	0
663	Bacteria	Firmicutes	Clostridia	Oscillospirales	Oscillospiraceae	V9D2013_group	uncultured_bacterium	0	0	0	0	0	0	0	0	0	0	0	0	2.21798e-05	0	0	0	0	0	0	0	0	0	0	0	0	0	0	0	0	0	0	0	0	0	0	0	0	0	0	0	0	0
664	Bacteria	Firmicutes	Clostridia	Oscillospirales	Oscillospiraceae	uncultured	unidentified	0.000447646	0.000294946	0.000658522	6.31433e-05	0	0.00101752	0	0.000284328	0.000238614	0	0.000407707	0	6.65395e-05	0.000324807	0.00210845	0.000172939	0	0	0.000223883	0.000908131	0	0.0003881	0.000673322	0	0.000497619	0.000345189	0.000470064	0	0	0	0.000567304	0.000434071	0.000351537	0.000347202	0	0.000299905	0.000574391	0.000179953	0	0	0	0.000410109
665	Bacteria	Firmicutes	Clostridia	Oscillospirales	Oscillospiraceae	uncultured	Clostridium_sp.	0.000447646	0.0134871	0.000201589	0.00122077	0.00103882	0	0	0.000408722	0	8.63055e-05	0.00245669	0	0.000665395	0.000203004	0	0	0	0	0	0.00399155	0	0.000373173	0.000131737	0	0.000213265	0.000995738	0.00118386	0	3.71987e-05	0.00216598	0.000945507	0	0.000366821	0.00618134	0	0.000991995	0.000327185	0.00590846	0	0.000263742	0	0.000939834
666	Bacteria	Firmicutes	Clostridia	Oscillospirales	Oscillospiraceae	uncultured	Intestinimonas_sp.	0	0	0	0	0	0	0	0	0.000125935	0	0	0	0	0	0	0	0	0	0	0	0	0	0	0	0	0	0	0	0	0	0	0	0	0.000187831	0	0	0	0	0	0	0	0
667	Bacteria	Firmicutes	Clostridia	Oscillospirales	Oscillospiraceae	uncultured	uncultured_bacterium	0	0	0	0	0	0	0	0	0	0	7.31781e-05	0	0	0	0	0	0	0	0	0	0	0	0	0	0	0	0	0	0	0	0.000378203	0	0	0.000870852	0	0	0	0.000194949	0	0	0	0
668	Bacteria	Firmicutes	Clostridia	Oscillospirales	Oscillospiraceae	uncultured	uncultured_organism	0	0	0.000107514	0	0.000401679	0	0	0	5.30254e-05	0.000323646	0	0	0	0.00014887	0	0.000239454	0	0	0	0.000823654	0	0	0.000190287	0	0.00042653	0.000159318	0	0.000329128	4.95983e-05	0.000207697	0.000346686	0.00016695	0.000275116	0.0002789	0.000189309	0.000115348	0	0.000254934	0.000961525	0.000197807	0	0.000786043
669	Bacteria	Firmicutes	Clostridia	Oscillospirales	Oscillospiraceae	uncultured	uncultured_rumen	0	0	0	0.000294669	0	0	0	0	0	0	0	0	0	0	0	0	0	0	0	0	0	0	0	0	0	0	0	0	0	0	0	0	0	0	0	0	0	0	0	0	0	0
670	Bacteria	Firmicutes	Clostridia	Oscillospirales	Oscillospiraceae	uncultured	unidentified	0	0	0	0	0	0	0	0	0	0	0	0	0	0	0	0	0	0	0	0	0	0	0	0	0	0	0	0	0	0	0	0	0	0	0	0	0	0	0	0	0	0
671	Bacteria	Firmicutes	Clostridia	Oscillospirales	Oscillospirales	Hydrogenoanaerobacterium	unidentified	0	0	0	0	0	0	0	0	0	0	0	0	0	0	0	0	0	0	0	0	0	0	0	0	0	0	0	0	0	0	0	0	0	0	0	0	0	0	0	0	0	0
672	Bacteria	Firmicutes	Clostridia	Oscillospirales	Oscillospirales	Hydrogenoanaerobacterium	Selenomonadales_bacterium	0	0	0	4.20955e-05	0	0	0	0.00035541	0	0	0	0	0	0	0	0	0	0	4.66422e-05	0	0	0	0	0	0	0	0.00389979	0	0	0	0.000126068	0	9.17053e-05	0	0	0	0	0	0	0.000219785	0	0
673	Bacteria	Firmicutes	Clostridia	Oscillospirales	Ruminococcaceae	unidentified	unidentified	0	0.0095187	0.000255345	0.00571447	0.000110808	0	0	0.0046381	0.000324781	0.000107882	0.00371118	0.00393217	0.00865014	0.000189471	0.00904651	0	0	0	0.000736947	0	0	0.000955324	0.000117099	0	4.2653e-05	5.3106e-05	0.00135796	0.000493692	0	0.00388689	0.000189101	0.00407359	0.000106989	0.00371677	0	0.00242231	0	0.000374903	0.00179763	0.000527484	0	0.000956921
674	Bacteria	Firmicutes	Clostridia	Oscillospirales	Ruminococcaceae	Anaerofilum	uncultured_bacterium	0	0	0	0	0	0	0	0.000213246	0	0	0	0	2.21798e-05	0	5.40628e-05	0	0	0	0	0	0	0	0	0	0	5.3106e-05	0	0	0	0	0.000157585	0	0.000259832	3.98429e-05	0	0	0	4.49883e-05	0	0	0	0
675	Bacteria	Firmicutes	Clostridia	Oscillospirales	Ruminococcaceae	Anaerotruncus	unidentified	0	0	0	0	0	0	0	0	0	0	0	0	0	0	0	0	0	0	0	0	0	0	0	0	0	0	0	0	0	0	0	0	0	3.98429e-05	0	0	0	0	0	0	0	0
676	Bacteria	Firmicutes	Clostridia	Oscillospirales	Ruminococcaceae	Anaerotruncus	Anaerotruncus_colihominis	0.000203475	0.000858024	0.000147832	7.36672e-05	9.69569e-05	0.000197852	0	0	8.61663e-05	0.000129458	3.13621e-05	0	0	0.000108269	0	0.000252757	0	0	0	0.000506864	0	0	0	0	0	0.000185871	0	0	0	0	0.000220618	0.000767972	0.000168126	2.27674e-05	0	0	0	0	0.000222962	0	0	0.000102527
677	Bacteria	Firmicutes	Clostridia	Oscillospirales	Ruminococcaceae	Anaerotruncus	Anaerotruncus_sp.	0	0	9.40746e-05	0	0	0	0	0.000142164	0	0	0.000229988	0	0	0	0	0	0	0	0	0	0	0	0	0	7.10884e-05	9.29356e-05	0.000208917	0	0	0	0.000157585	0	9.17053e-05	0.000113837	0	0	0	0.000134965	0	6.59355e-05	0	0
678	Bacteria	Firmicutes	Clostridia	Oscillospirales	Ruminococcaceae	Angelakisella	Ruminococcus_sp.	0	0	0	0	0	0	0	0	0	0	0	0	0	0	0	0	0	0	0	0.000359029	0	0	0	0	0	0	0	0	0	0	0	0	0	0	0	0	0	8.99766e-05	0	0	0	0
679	Bacteria	Firmicutes	Clostridia	Oscillospirales	Ruminococcaceae	CAG-352	uncultured_bacterium	0	0	0.00213684	0	0	0	0	0	0	0	0	0	0	0	0	0	0	0	0	0	0	0	0	0	0	0	0	0	0	0	0	0	0	0	0	0	0	0.000119969	0	0	0	0
680	Bacteria	Firmicutes	Clostridia	Oscillospirales	Ruminococcaceae	CAG-352	uncultured_organism	0	0	0	0	0	0	0	0	0	0	0	0	0	0	0	0	0	0	0	0	0	0	0	0	0	0	0	0	0	0	0	0	0	0	0	0	0	0	0	0	0	0
681	Bacteria	Firmicutes	Clostridia	Oscillospirales	Ruminococcaceae	Candidatus_Soleaferrea	Ruminococcaceae_bacterium	0	0	0	0	0	0	0	0	0	0	2.0908e-05	0	4.43597e-05	0	0	0	0	0	0	0	0	0	0	0	0	0	0	0	0	0	0	0	0	0	0	0	0	0	8.36109e-05	0	0	0
682	Bacteria	Firmicutes	Clostridia	Oscillospirales	Ruminococcaceae	Candidatus_Soleaferrea	uncultured_Anaerotruncus	0	0	0	0	0	0	0	0	0	0	0	0	0	0	0	0	0	0	0	4.22386e-05	0	0	0	0	0	0	0	0	0	0	0	0	0	0	0	0	0	0	0	0	0	0
683	Bacteria	Firmicutes	Clostridia	Oscillospirales	Ruminococcaceae	Candidatus_Soleaferrea	uncultured_bacterium	0	5.36265e-05	0	6.31433e-05	4.1553e-05	0	0	0.000764132	0	0	0	0	0.000133079	0	0	0	0	0	0	6.3358e-05	0	0	5.85497e-05	0	5.68707e-05	0	0	0	0	0	0	0	6.11368e-05	0.000233366	0	0	0	0	0.000209027	0	0	0
684	Bacteria	Firmicutes	Clostridia	Oscillospirales	Ruminococcaceae	Caproiciproducens	uncultured_bacterium	0	0	0.000107514	0.000221001	0.000207765	0	0	0	0	0	0.000648149	0	0	0.000392475	0	0	0	0	0	0.000380148	0.000170641	0	0	0	0	0	0.000191508	0	0	0.000474735	0.000189101	0.000734582	0.000443242	0	0	0.000253766	0	0	0	0	0	0
685	Bacteria	Firmicutes	Clostridia	Oscillospirales	Ruminococcaceae	DTU089	unidentified	0	0	0	0	0	0	0	0	0	0	0	0	4.43597e-05	0	0	0	0	0	0	0	0	0	0	0	0	0	0	0	0	0	0	0	0	0	0	0	0	0	0	0	0	0
686	Bacteria	Firmicutes	Clostridia	Oscillospirales	Ruminococcaceae	DTU089	uncultured_organism	0	0.00252045	9.40746e-05	0	8.31059e-05	0	0	0	0.000139192	0	5.22701e-05	0	0.00217362	0.000338341	7.20838e-05	0	0	0	0	0.000232313	0	0	0	0	0.000170612	0.000212424	0	0.000219419	0	0.000830787	0.000126068	0	0.000213979	0.000119529	0	0	0	0.000224942	0.000850044	0	0	0.000170879
687	Bacteria	Firmicutes	Clostridia	Oscillospirales	Ruminococcaceae	Faecalibacterium	unidentified	0.120132	0.11712	0.189654	0.0832755	0.123205	0.0290277	0.101418	0.0489755	0.107496	0.110493	0.157762	0.0372737	0.00294992	0.164894	0.0750933	0.188158	0.0261558	0.000108221	0.0443847	0.0647096	0.128663	0.121237	0.125809	0.0765138	0.152229	0.0825932	0.0794234	0.0120132	0.00215752	0.161588	0.126225	0.0440415	0.030706	0.119688	0.169999	0.139802	0.00322822	0.105857	0.122169	0.033715	0.00716606	0.180756
688	Bacteria	Firmicutes	Clostridia	Oscillospirales	Ruminococcaceae	Faecalibacterium	Ruminococcaceae_bacterium	0	0	0	0	0	0	0	0	0	0	0	0	0	0	0	0	0	0	0	0	0	0	0	0	0	0	0	0	0	0	0.000126068	0	0	0	0	0	0	0	0	0	0	0
689	Bacteria	Firmicutes	Clostridia	Oscillospirales	Ruminococcaceae	Faecalibacterium	metagenome	0.00813901	0	0	0	0.00948793	0	0.00420738	0.000177705	0.00428843	0.00241655	0	0	0	0.000879686	0.000792921	0.00192894	0.000980536	0	0.00100747	0	0.00166375	0.00213455	0	0	0	0.00165956	0.00475287	0	0	0	0.000977024	0	0.000259832	0	0.0038335	0.00110734	0	0	0	0.00114288	0	0.00498966
690	Bacteria	Firmicutes	Clostridia	Oscillospirales	Ruminococcaceae	Faecalibacterium	uncultured_Clostridiaceae	0	0	0	0	0	0	0	0	0	0	0	0	0	0	0	0	0	0	0	0	0	0	0	0	0	0	0	0	0	0	0	0	0	0	0	0	0	0	0	0	0	0
691	Bacteria	Firmicutes	Clostridia	Oscillospirales	Ruminococcaceae	Faecalibacterium	uncultured_Ruminococcaceae	0	0	0	0	0	0	0	0	0	0	0	0	0	0	0	0	0	0	0	0	0	0	0	0	0	0	0	0	0	0	0	0	0	0	0	0	0	0	0	0	0	0
692	Bacteria	Firmicutes	Clostridia	Oscillospirales	Ruminococcaceae	Faecalibacterium	uncultured_bacterium	0	0	0	0	0	0	0	0	0	0	0	0	0	0	0	0	0	0	0	0	0	0	0	0	0	0	0	0	0	0	0	0	0	0	0	0	0	0	0	0	7.43882e-05	0
693	Bacteria	Firmicutes	Clostridia	Oscillospirales	Ruminococcaceae	Faecalibacterium	unidentified	0	0	0	0	0	8.47937e-05	0	0	0	0	0	0	0	0	0	0	0	0	0	0	0	0	0	0	2.84353e-05	0	0	0	0	0	0	0	0	0	0	0	0	0	0	0	0	0
694	Bacteria	Firmicutes	Clostridia	Oscillospirales	Ruminococcaceae	Fournierella	unidentified	0	0	0	0	0	0	0	0	0	0	0	0	0	0	0	0	0	0.000297607	0	4.22386e-05	0	0	0	0	0	0	0	0	0	0	0	0	0	0	0	0	0	0	0	0	0	0
695	Bacteria	Firmicutes	Clostridia	Oscillospirales	Ruminococcaceae	Fournierella	uncultured_bacterium	0	0	0	0	0	0	0.000288409	0	0	0	0	0	0	0	0	0	0	0	0	0.00333685	0.00179173	0	0.0021517	0	0	0	0	0	0	0	0	0	0	0	0	0	0	0.000134965	0	0	0	0
696	Bacteria	Firmicutes	Clostridia	Oscillospirales	Ruminococcaceae	Fournierella	uncultured_organism	0	0	0	0	0	0	0	0.000124394	0	0	0	0	2.21798e-05	0	0	0	0	0	0	0	0	0	0	0	0	0	0	0	2.47991e-05	0	0	0	0.000336253	0	0	0	0	0	0	0	0	0
697	Bacteria	Firmicutes	Clostridia	Oscillospirales	Ruminococcaceae	Harryflintia	unidentified	0	0	0	0	0	0	0	0	0	0	0	0	4.43597e-05	0	0	0	0	0	0	0	0	0	0	0	5.68707e-05	0	0	0	0	0	0	0	0	9.10695e-05	0	0	0	0	0	0	0	0
698	Bacteria	Firmicutes	Clostridia	Oscillospirales	Ruminococcaceae	Harryflintia	uncultured_bacterium	0	0	0	0	0	0	0	0	0	0	0	0	0	0	0	0	0	0	0	0	0	0	0	0	0	0	0	0	0	0	0	0	0	5.69184e-05	0	0	0	0	0	0	0	0
699	Bacteria	Firmicutes	Clostridia	Oscillospirales	Ruminococcaceae	Incertae_Sedis	unidentified	0.00337769	0	0.000241906	0	0.000193914	0	0	0.000231017	0.000132564	0.00023734	0.000480885	0	0.0133966	0.000717282	0.000252293	0	0.000416728	0	0.000139927	0	0.000127981	0	0.00150766	0	8.5306e-05	0.000252254	0.00224586	0.00213933	0	0	0.000315169	0	0.00169655	0.000239057	0.000189309	0	0	0.000509867	0.00189518	0.000131871	0	0.000222142
700	Bacteria	Firmicutes	Clostridia	Oscillospirales	Ruminococcaceae	Incertae_Sedis	Clostridium_sp.	0	0	0	0.000547242	0	0	0	0	0	0	0	0	0.000155259	0	0	0	0	0	0	0	0	0	0	0	0	0	0	0	0	0	0	0	0	0	0	0	0	0	0	0	0	0
701	Bacteria	Firmicutes	Clostridia	Oscillospirales	Ruminococcaceae	Incertae_Sedis	Clostridium_leptum	0	0.00171605	0	0.000315716	0	0.00104579	0	7.1082e-05	0	0	0.000125448	0	0.000576676	0.000108269	0	0	0	0	0	0	0	0	0	0	0	0	0.000243737	0.0342293	0	0.000207697	0.000724889	0	7.6421e-05	0.000318743	0	0.000299905	0	0	5.57406e-05	0	0	0
702	Bacteria	Firmicutes	Clostridia	Oscillospirales	Ruminococcaceae	Incertae_Sedis	uncultured_bacterium	0.000122085	0	0	0.000631433	0	0	0	0	0	0	0.000125448	0	0.000177439	0	0	0	0	0	0	0.000464625	0	0	0	0	0	0	0	0	0	0	0	0	3.05684e-05	3.98429e-05	0	0	0	0	0.00429202	0	0	0
703	Bacteria	Firmicutes	Clostridia	Oscillospirales	Ruminococcaceae	Incertae_Sedis	uncultured_organism	0.000406951	0.00144792	0.00017471	0.000399907	0	0.00166761	0	0.000799673	0.000410947	0.000625715	0	0	0.000221798	0.000541345	0	0	0.000882483	0.000554631	0	0	0	0	0.000263474	0.000336768	0.000540272	0	0	0	0.00106636	0.000207697	0	0.00176968	0.00106989	0.000409813	0.000378618	0.000392184	0.00167955	0.000209945	0.00104514	0	0	0.00023923
704	Bacteria	Firmicutes	Clostridia	Oscillospirales	Ruminococcaceae	Negativibacillus	unidentified	0	0	0	0	0	0	0	0	0	0	0	0	4.43597e-05	0	0	0	0	0	0	6.3358e-05	0	0	0	0	0	0	0	0	0	0	0	0	0	0	0	0	0	0	0	0	0	0
705	Bacteria	Firmicutes	Clostridia	Oscillospirales	Ruminococcaceae	Negativibacillus	Ruminococcus_sp.	0	0	0	0	0	0	0	0	0	0	0	0	0	0	0	0	0	0	0	0	0	0	0	0	0	0	0	0	0	0	0	0	0	0	0	0	0	0	0	0	0	0
706	Bacteria	Firmicutes	Clostridia	Oscillospirales	Ruminococcaceae	Negativibacillus	uncultured_bacterium	0	0	0	0	0	0	0	0	0	0	0	0	0.000687575	0	0	0	0	0	0	0.00137276	0	0	0.000278111	0	0	0.000159318	0	0	4.95983e-05	0	0.000535787	0.000767972	0	0.000261825	0	0	0	0.000254934	0	0.00015385	0	0.00205055
707	Bacteria	Firmicutes	Clostridia	Oscillospirales	Ruminococcaceae	Negativibacillus	uncultured_organism	0	0	0	0	0	0	0	0	0	0	0	0	0	0	0	0	0	0	0	0.00821542	0	0	0	0	0.00363972	0	0	0.000603401	0	0	0	0	0	0	0	0.00149953	0	0	0.000654952	0	0.000371941	0
708	Bacteria	Firmicutes	Clostridia	Oscillospirales	Ruminococcaceae	Paludicola	unidentified	0	0	0	0	0	0	0	0	0	0	0	0	0	0	0	0	0	0	0	0	0	0	0	0	0	0	0	0	0	0	0	0	0	0	0	0	0	0	0	0	0	0
709	Bacteria	Firmicutes	Clostridia	Oscillospirales	Ruminococcaceae	Paludicola	Ruminococcaceae_bacterium	0	0	0	0	0	0	0	0	0	0	0	0	0.000133079	0	0	0	0	0	0	0	0	0	0	0	0	0	0	0	0	0	0	0	0	0	0	0	0	0	0	0	0	0
710	Bacteria	Firmicutes	Clostridia	Oscillospirales	Ruminococcaceae	Paludicola	uncultured_bacterium	0	0	0	0	9.69569e-05	0	0	0	0	0	6.27241e-05	0	6.65395e-05	0	0	0	0	0	0	0.000295671	0	0	0	0	0	0	0.000261147	0	0	0	0	0	0	6.83021e-05	0	0	0	0.000209945	8.36109e-05	0	0	0
711	Bacteria	Firmicutes	Clostridia	Oscillospirales	Ruminococcaceae	Phocea	unidentified	0	0.000214506	4.03177e-05	0.000263097	0.000124659	0	0	0	0	0	0	0	0	0.000216538	0	0	0	9.46931e-05	0	0.000443506	0	0.000119415	7.31872e-05	0	9.95237e-05	0	0	0	0	0.000178026	0	0.000701192	0.0002904	7.3994e-05	0	0.000253766	0.000530766	0	0	6.59355e-05	0	0
712	Bacteria	Firmicutes	Clostridia	Oscillospirales	Ruminococcaceae	Phocea	uncultured_bacterium	0	0	0	0	0	0	0	0	0	0	0	0	0	0	0	0	0	0	0	0	0	0	0	0	0	0	0	0	0	0	0	0	0	0	0	0	0	0	0	0	0	0
713	Bacteria	Firmicutes	Clostridia	Oscillospirales	Ruminococcaceae	Pygmaiobacter	uncultured_bacterium	0	0	0	0	0	0	0	0	0	0	0	0	0	0	0	0	0	0	0	0	0	0	0	0	0	0	0	0	0	0	0	0	0	0	0	0	0	0	0	0	0	0
714	Bacteria	Firmicutes	Clostridia	Oscillospirales	Ruminococcaceae	Ruminococcaceae	uncultured_bacterium	0	0	0	0	0	0	0	0	0	0	0	0	0	0	0	0	0	0	0	0	0	0	0	0	0	0	0	0	0	0	0	0	0	0	0	0	0	0	0	0	0	0
715	Bacteria	Firmicutes	Clostridia	Oscillospirales	Ruminococcaceae	Ruminococcus	unidentified	0.00211614	0	0	4.20955e-05	0	0.00638779	0	0	0.00606478	0.00330118	0	0.0016384	0	0	0	0	0	0	0	0	0	0	0	0	0.000199047	7.96591e-05	0.00074862	0	0.00029759	0.000237368	0.0189101	0	0.0207865	0.00266947	0	0.00149953	0	0	0	0.000769248	0	0.000700603
716	Bacteria	Firmicutes	Clostridia	Oscillospirales	Ruminococcaceae	Ruminococcus	Ruminococcus_bicirculans	0	0.00112616	0.030198	0.0647534	0.000304722	0	0.000814332	0.0239013	0.00517661	0.0100977	0	0	0.000621035	0	0.00582076	0.0214444	0.00014708	0	0.0101027	0	0.00183439	0.00298539	0	0	0.150878	0	0.00080085	0.000383982	0	0.032193	0.00665007	0.0481819	0	0.023126	0	0.000553672	0	0.0161958	0	0.000483527	9.91842e-05	0.0298354
717	Bacteria	Firmicutes	Clostridia	Oscillospirales	Ruminococcaceae	Ruminococcus	Ruminococcus_callidus	0	0	0.00108858	0	0.000789506	0	0.000882193	0	0.00268441	0.000258916	0	0.00237569	0.000133079	0.00177291	0.000234272	0	0	0	0.000485079	0.00228089	0.000341282	0.000104489	0.000907521	0.0017512	0.00261605	0	0.00114905	0.0224355	0	0.00154289	0.00104006	0	0.000947621	0.00245318	0	0	0	0.00157459	0	0.00043957	0	0
718	Bacteria	Firmicutes	Clostridia	Oscillospirales	Ruminococcaceae	Ruminococcus	Ruminococcus_champanellensis	0	0	0	0	0	0	0	0	0	0	0	0	0	0	0	0	0	0	0	0	0	0	0	0	0	0	0	0	0	0	0	0	0	0	0	0	0	0	0	0	0	0
719	Bacteria	Firmicutes	Clostridia	Oscillospirales	Ruminococcaceae	Ruminococcus	Ruminococcus_flavefaciens	0	0	0	0	0	0	0	0	0.000125935	0	0	0	0	0	0	0	0	0	0	0	0	0.00398549	0	0	0	0	0	0	0	0	0	0	0	0	0	0	0	0	0	0	0	0
720	Bacteria	Firmicutes	Clostridia	Oscillospirales	Ruminococcaceae	Ruminococcus	Ruminococcus_sp.	0	0	0	0	0	0	0	0	0	0	0	0	0	0	0	0	0	0	0	0	0	0	0	0	0	0	0	0	0	0	0	0	0	0	0	0	0	0	0	0	0	0
721	Bacteria	Firmicutes	Clostridia	Oscillospirales	Ruminococcaceae	Ruminococcus	bacterium_enrichment	0	0	0	0	0	0	0	0	0	0	0	0	0	0	0	0	0	0	0	0	0	0	0	0	0	0	0	0	0	0	0	0	0	0	0	0	0	0	0	0	0	0
722	Bacteria	Firmicutes	Clostridia	Oscillospirales	Ruminococcaceae	Ruminococcus	gut_metagenome	0	0	0	0	0	0	0	0	0.00231986	0	0	0	0	0	0	0	0	0	0	0	0	0	0	0	0	0.0158522	0.000295966	0	0	0	0	0	0	0	0	0	0	0	0	0	0	0
723	Bacteria	Firmicutes	Clostridia	Oscillospirales	Ruminococcaceae	Ruminococcus	metagenome	0	0	0	0.0021574	0.000263169	0	0	0	0	0.00196345	0	0	0.000554496	0	0.000234272	0.00437669	0.00203461	0	0.00351682	0	0.00106651	0.000701566	0	0.00309827	0	0	0	0.00976413	0	0	0	0.00537581	0	0	0	0	0	0	0	0	0.000198368	0.00165752
724	Bacteria	Firmicutes	Clostridia	Oscillospirales	Ruminococcaceae	Ruminococcus	uncultured_Ruminococcaceae	0	0	0	0	0	0	0	0	0	0	0	0	0	0	0	0	0	0	0	0	0	0	0	0	0	0	0	0	0	0	0	0	0	0	0	0	0	0	0	0	0	0
725	Bacteria	Firmicutes	Clostridia	Oscillospirales	Ruminococcaceae	Ruminococcus	uncultured_Ruminococcus	0	0	0	0	0	0	0	0.000852985	0	0	0	0	0	0	7.20838e-05	0	0	0	0	0	0	0	0	0	0	9.29356e-05	0	0	0	0	0	0	0	0	0	0	0	0	0	0	0	0
726	Bacteria	Firmicutes	Clostridia	Oscillospirales	Ruminococcaceae	Ruminococcus	uncultured_bacterium	0	0	0	0	0	0	0	0	0	0	0	0	0	0	0	0	0	0	0	0	0	0	0	0	0	0	0	0	0	0	0	0	0	0	0	0	0	0	0	0	0	0
727	Bacteria	Firmicutes	Clostridia	Oscillospirales	Ruminococcaceae	Ruminococcus	uncultured_organism	0	0.00316396	0	0.00357812	0	0	0	0.0022924	0	0	0	0	0	0	0	0.000864695	0	0	0	0.00642027	0	0	0	0	0	0	0	0	0.000210793	0	0.000157585	0	0	0.0029313	0	0.0018225	0	0	0.00094759	0	0	0
728	Bacteria	Firmicutes	Clostridia	Oscillospirales	Ruminococcaceae	Subdoligranulum	unidentified	0.0121271	0.00378067	0.0101332	0	0.0105406	0	0.00174742	0.0029499	0.00864977	0.00791853	0.00110813	0.00679938	0.00239542	0.0117607	0.00491972	0.0127709	0.00527038	0	0.00455228	0	0.00362613	0.00635887	0.00487426	0.00255944	0.00218952	0.00269513	0.0146416	0.00235875	0	0.00560781	0.00475905	0	0.0119523	0.00401844	0.00821127	0.00498304	0.00232665	0	0	0.00973648	0.00101664	0.0122691
729	Bacteria	Firmicutes	Clostridia	Oscillospirales	Ruminococcaceae	Subdoligranulum	metagenome	0.000122085	0	0	0	0	0	0	0	0	0	0	0	0	0	0	0	0	0	0	0	0	0	0	0	2.84353e-05	0	0	0	0	0	0	0	0	0	0	0	0	0	0	0	0	0
730	Bacteria	Firmicutes	Clostridia	Oscillospirales	Ruminococcaceae	Subdoligranulum	uncultured_Subdoligranulum	0	0	0	0	0	0	0	0	0	0	0	0	0.000487956	0	0	0	0	0	0	0	0	0	0	0	0	0	0	0	0	0	0	0	0	0	0	0	0	0	0	0	0	0
731	Bacteria	Firmicutes	Clostridia	Oscillospirales	Ruminococcaceae	Subdoligranulum	uncultured_bacterium	0.003337	0	0.000282224	0.00128391	0.00378132	0	0.0016626	0.0247899	0.00582617	0.00608454	0.0124507	0.0064717	0.0102027	0.0030586	0.0030996	0.00348539	0.00159337	0	0.00838627	0	0.0031142	0.00058215	0.00187359	0.000808244	0.00823203	0.00126127	0.00818259	0.0133845	0	0	0.00898232	0.00220375	0.0124261	0	0.00442509	0.0134035	0	5.99844e-05	0	0.00465944	0	0.0189163
732	Bacteria	Firmicutes	Clostridia	Oscillospirales	Ruminococcaceae	Subdoligranulum	uncultured_organism	0	0	0	0	0	0	0	0	0	0	0	0	0	0	0	0	0	0	0	0	0	0	0	0	0	0	0	0	0	0	0	0	0	0	0	0	0	0	0	0	0	0
733	Bacteria	Firmicutes	Clostridia	Oscillospirales	Ruminococcaceae	UBA1819	Ruthenibacterium_lactatiformans	0	0	0	0	0	0	0	0	0	0	0	0	0	0	0	0	0	0	0	0	0	0	0	0	0	0	0	0	0	0	0	0.00010017	0	0	0	0	0	0	0	0	0	0
734	Bacteria	Firmicutes	Clostridia	Oscillospirales	Ruminococcaceae	UBA1819	uncultured_organism	0.00024417	0.00099209	0.000295663	0.000799815	0.000180063	0.0017524	0	0	0.000238614	0	0.001704	0	0.00184093	0.000514278	0	0.000172939	0	0	4.66422e-05	0.00403379	0.000127981	0.000164196	0.000219561	0.00074089	0.000440748	0.000185871	0	0.000329128	0	0	0	0.00200341	0.00158956	0.000267517	0	0.000115348	0	0.000224942	0.00477976	0	0	0.00032467
735	Bacteria	Firmicutes	Clostridia	Oscillospirales	Ruminococcaceae	Eubacterium_siraeum_group	unidentified	0	0	0	0	0	0	0	0	0	0	0	0	0	0	0	0	0	0	0	0	0	0	0	0	0	0	0	0	0	0	0	0	0	0	0	0	0	0	0	0	0	0
736	Bacteria	Firmicutes	Clostridia	Oscillospirales	Ruminococcaceae	Eubacterium_siraeum_group	Eubacterium_siraeum	0.018679	0	0.0016799	0	0.00271479	0	0.0020528	0.000817444	0.0224496	0	0	0.00950274	0.00228452	0.0264988	0	7.9818e-05	0	0	0	0.0130729	0.000341282	0.0115236	0	0	0	0	0.000853079	0.00159078	0	0	0.00828895	0.0122542	0.00939979	0	0	0.00380649	0	0	0	0.00560452	7.43882e-05	0
737	Bacteria	Firmicutes	Clostridia	Oscillospirales	Ruminococcaceae	Eubacterium_siraeum_group	gut_metagenome	0	0	0	0	0	0	0	0	0	0	0	0	0	0	3.60419e-05	0	0	0	0	0	0	0	0	0	0	0	0	0	0	0	0	0	0	0	0	0	0	0	0	0	0	0
738	Bacteria	Firmicutes	Clostridia	Oscillospirales	Ruminococcaceae	Eubacterium_siraeum_group	uncultured_bacterium	0	0	0	0	0	0	0	0	0.00222707	0	9.40862e-05	0.00139264	0	0	0.00109928	0	0	0	0.00851687	0	0	0.00389593	0	0	0	0	0.000365605	0	0	0	0.00255287	0	0.00140615	0.00253287	0	0	0	0.00026993	0	0.00213191	0	0.00234104
739	Bacteria	Firmicutes	Clostridia	Oscillospirales	Ruminococcaceae	Eubacterium_siraeum_group	unidentified	0	0	0	0	0	0	0	0	0	0	0	0	2.21798e-05	0	0	0	0	0	0	0.000147835	0	0	0	0	0	0	0	0	0	0	0	0	0	0	0	0	0	0	0	0	0	0
740	Bacteria	Firmicutes	Clostridia	Oscillospirales	Ruminococcaceae	uncultured	unidentified	0.000366256	0	0.000456934	0.000494622	0.000567891	0	6.7861e-05	0.000462033	0	0.000798326	0	0.0012288	0.000133079	0	0.000234272	0	0.00156886	0	2.79853e-05	0.000337909	0	0.000253758	0	0.000673537	0	0.000212424	0.000365605	0.000548546	0	0	0.00217467	0	0.00128387	0.000261825	0	0.000599811	0	0.000104973	0	0.000351656	0	0
741	Bacteria	Firmicutes	Clostridia	Oscillospirales	Ruminococcaceae	uncultured	gut_metagenome	0	0	0.00505315	0.00268359	0	0	0.0011706	0.00238125	0	0	0	0.0199885	0.00115335	0	0.00755077	0	0	0	0.000270525	0	0.000511924	0.00425418	0.00358617	0	0.00481979	0	0.00181062	0.00175535	0	0	0.0106527	0	0	0	0.00127783	0.00456779	0	0	0	0.00450559	0	0
742	Bacteria	Firmicutes	Clostridia	Oscillospirales	Ruminococcaceae	uncultured	human_gut	0.00024417	0.000241319	0	0	0.000775655	0.0027134	0	0.000497574	0	0	0	0.00294913	0.000421417	0.000839085	0.000126147	0.000279363	0	0	0.000186569	0.000485744	0.00127981	0.00150762	0.00111244	0	0.000995237	0.000132765	0.000678981	0.00148108	0	0	0.00160736	0.00327223	0	0.00136035	0.000709908	0.0010612	0	0.00088477	0.00426415	0.0011209	0	0.00088857
743	Bacteria	Firmicutes	Clostridia	Oscillospirales	Ruminococcaceae	uncultured	metagenome	0	0	0	7.36672e-05	0	0	0	0	0	0	0	0	0	0.000568413	0	0	0	0	0	0	0	0	0.000336661	0	0	0	0	0	0	0	0	0	0	0	0	0	0	0	0	0.000197807	0	6.83515e-05
744	Bacteria	Firmicutes	Clostridia	Oscillospirales	Ruminococcaceae	uncultured	uncultured_Clostridiales	0	0	0	0	0	0	0	0	0	0	0	0	0	0	0	0	0	0	0	0	0	0	0	0	0	0	0	0	0	0	0	0	0	9.10695e-05	0	0	0	0	0	0	0	0
745	Bacteria	Firmicutes	Clostridia	Oscillospirales	Ruminococcaceae	uncultured	uncultured_Clostridium	0	0	0	0	0.000720252	0	0	0	0	0	0	0	8.87193e-05	0.000257139	3.60419e-05	0	0	0	0	0	0	8.95616e-05	0	0	0	0	0	0	0	0	0.000126068	0	0	0	0.000236636	0	0	0	0	0	0	0
746	Bacteria	Firmicutes	Clostridia	Oscillospirales	Ruminococcaceae	uncultured	uncultured_Ruminococcus	0	0.000429012	0	6.31433e-05	0	0	0	0	0	0.000129458	0	0	4.43597e-05	0	0	0	0	0	0	0	0	0	0	0	0.000156394	7.96591e-05	0.000139278	0	0	0	0	0.000467461	0	0	0	0	0	0	0	0	0	0
747	Bacteria	Firmicutes	Clostridia	Oscillospirales	Ruminococcaceae	uncultured	uncultured_bacterium	0.000529036	0.000348572	0.000228467	0.00018943	0.000567891	0	0.000101792	0.00271889	0.000212102	0.000560986	0.000428615	0.000327681	0.00479084	0.000920287	0.0007749	0.00026606	0	0	0.000130598	0.000696938	0	0.000253758	0.000585497	0	0	0.000597443	0.00154947	0	0	0	0.00040972	0	0.00258303	0.000774091	0	0.000553672	0	0.000314918	0	0	0	0.00119615
748	Bacteria	Firmicutes	Clostridia	Oscillospirales	Ruminococcaceae	uncultured	uncultured_organism	0	0	0.00135736	0.000589337	4.1553e-05	0.000339175	0	0	0.000888176	0	5.22701e-05	0	0.000243978	6.76682e-05	0	0	0	0	0	0.000485744	0	0	0	0	0	3.98295e-05	8.70489e-05	0.000329128	0	0	0.000157585	0.000267121	0	0.000341511	0	0.000115348	0	0.000329914	0	0	0	0
749	Bacteria	Firmicutes	Clostridia	Oscillospirales	Ruminococcaceae	uncultured	uncultured_rumen	0	0	0	0	0	0	0	0	0	0	0	0	0	0	0	0	0	0	0	0	0	0	0	0	0	0	0	0	0	0	0	0	0	0	0	0	0	0	0	0	0	0
750	Bacteria	Firmicutes	Clostridia	Oscillospirales	UCG-010	UCG-010	unidentified	0	0	0	0	0.000387828	0	0	0.00181259	0.000318153	0.000409951	0	0.00139264	0.00310518	0	0.000144168	0.000997725	0.00296612	0	5.59707e-05	0	0.00123715	0.00114937	0.000292749	0	0	0	0.00365605	0.000164564	0	0	0.000630338	0	0	0.0011896	0.000520599	0.00101506	0	0.000134965	0	0.00208796	0	0.000615164
751	Bacteria	Firmicutes	Clostridia	Oscillospirales	UCG-010	UCG-010	bacterium_enrichment	0	0	0	0	0	0	0	0	0	0	0	0	0	0	0	0	0	0	0	0	0	0	0	0	0	0	0	0	0	0	0.00163888	0	0	0	0	0	0	0	0	0	0	0
752	Bacteria	Firmicutes	Clostridia	Oscillospirales	UCG-010	UCG-010	gut_metagenome	0	0	0	0	0	0	0	0.00156381	0	0	0	0.00491521	0.00288338	0	0.0023247	0.000811483	0	0	0	0	0	0.00092547	0	0	0	0	0	0	0	0	0.000504271	0	0	3.98429e-05	0	0	0	5.99844e-05	0	0.00109893	0	0
753	Bacteria	Firmicutes	Clostridia	Oscillospirales	UCG-010	UCG-010	metagenome	0	0	0	0.000568289	0	0	0	0.000657509	0	0	0	0	6.65395e-05	0	0.00400065	0.00497532	0	0	8.3956e-05	0	0.00170641	0.00137328	8.78246e-05	0	0	0	0.000313376	0	0	0	0.00160736	0	0	0	0	0	0	0	0	0.000703312	0	0
754	Bacteria	Firmicutes	Clostridia	Oscillospirales	UCG-010	UCG-010	uncultured_bacterium	0	0	0	0	0.000180063	0	0	0.00238125	0	0.000496256	0	0	0	0	0.00331585	0.00174269	0.000343188	0	0	0	0	0.0124938	0	0	0	0	0.00212399	0	0	0	0.0393961	0	0	0	0	0.000276836	0	0.000254934	0	0.0227917	0	0
755	Bacteria	Firmicutes	Clostridia	Oscillospirales	UCG-010	UCG-010	uncultured_organism	0	0	0	0	0	0	0	0.000515345	0	0	0	0	0.000155259	0	0.000216251	0	0	0	0	0	0	0	0	0	0	0	0	0	0	0	0.00334079	0	0	0	0	0	0	0	0	0	0	0
756	Bacteria	Firmicutes	Clostridia	Oscillospirales	UCG-010	UCG-010	uncultured_rumen	0	0	0	0	0	0	0	0	0	0	0	0	0	0	0	0	0	0	0	0	0	0	0	0	0	0	0	0	0	0	0	0	0	0	0	0	0	0	0	0	0	0
757	Bacteria	Firmicutes	Clostridia	Oscillospirales	UCG-010	UCG-010	unidentified	0	0	6.71962e-05	0	0	0	0	5.33115e-05	0	0	0	0	0	0.00014887	0	0	0	0	0	0	0	5.97077e-05	0	0	0	0	0.000609342	0	0	0	0	0	0	0.000125221	0	0	0	0	0	0	0	0
758	Bacteria	Firmicutes	Clostridia	Oscillospirales	UCG-011	UCG-011	uncultured_bacterium	0	0	0	0	0	0	0	3.5541e-05	0	0	0	0	2.21798e-05	0	0	0	0	0	0	0	0	0	0	0	0	0	0	0	0	0	0	0	0	0	0	0	0	0	0	0	0	0
759	Bacteria	Firmicutes	Clostridia	Oscillospirales	Clostridium_methylpentosum_group	Clostridium_methylpentosum_group	Ruminococcus_sp.	0	0.000723958	0	0	0	0	0	0	0	0	0	0	8.87193e-05	0	0	0	0	0	0	0	0	0	0	0	0	0	0	0	0	0.000148355	0	0	6.11368e-05	0	0	0	0	0.000134965	0	0	0	0
760	Bacteria	Firmicutes	Clostridia	Oscillospirales	Clostridium_methylpentosum_group	Clostridium_methylpentosum_group	uncultured_bacterium	0	0	0	0	0	0	0	0	0	0	0	0	0	0	0	0	0	0	0	0	0	0	0	0	0	0	0	0	0	0	0	0	0	0	0	0	0	0	0	0	0	0
761	Bacteria	Firmicutes	Clostridia	Oscillospirales	Clostridium_methylpentosum_group	Clostridium_methylpentosum_group	uncultured_organism	0	0	0	0	0	0	0	0	0	0	0	0	0	0	0	0	0	0	0	0	0	0	0	0	0	0	0	0	0	0	0	0	0	0	0	0	0	0	0	0	0	0
762	Bacteria	Firmicutes	Clostridia	Oscillospirales	Eubacterium_coprostanoligenes_group	Eubacterium_coprostanoligenes_group	unidentified	0.00293005	0	0.0104557	0	0.00865687	0	0.00754954	0.00979155	0.000888176	0.00204976	0	0.0521832	0.0142173	0.0179862	0.000324377	0.00111745	0.000269647	0	0.000111941	0	0.00157843	0.014912	0.000585497	0.000808244	2.84353e-05	0.0509818	0.0146764	0.00219419	0	0.00462867	0.0350783	0.0043741	0.00411145	0	0.00319459	0.0145339	3.63539e-05	0.00175454	0.0012681	0.0084837	0	0.00174296
763	Bacteria	Firmicutes	Clostridia	Oscillospirales	Eubacterium_coprostanoligenes_group	Eubacterium_coprostanoligenes_group	Clostridiales_bacterium	0	0	0	0	0	0	0	0	0	0	0.00951316	0	0	0	0.000108126	0	0	0	0	0	0	0	0	0	0	0	0	0	0	0	0	0	0	0	0	0	0	0	0	0	0	0
764	Bacteria	Firmicutes	Clostridia	Oscillospirales	Eubacterium_coprostanoligenes_group	Eubacterium_coprostanoligenes_group	Eubacteriaceae_bacterium	0	0	0	0	0	0	0	0	0	0	0	0	0	0	0	0	0	0	0	6.3358e-05	0	0	0	0	0	0	0	0	0	0	0	0	0.000152842	0	0.00033129	0	0	0	0	0	0	0
765	Bacteria	Firmicutes	Clostridia	Oscillospirales	Eubacterium_coprostanoligenes_group	Eubacterium_coprostanoligenes_group	Eubacterium_coprostanoligenes	0	0	0	0	0	0	0	0	0	0	0	0	0	0	0	0	0	0	0	0	0	0	0	0	0	0	0	0	0	0	0	0	0	0	0	0	0	5.99844e-05	0	0	0	0
766	Bacteria	Firmicutes	Clostridia	Oscillospirales	Eubacterium_coprostanoligenes_group	Eubacterium_coprostanoligenes_group	gut_metagenome	0	0.00332484	0.0281418	0.0222791	0.0138648	0	0	0	0.0168422	0	0	0.00425985	0.0302089	0	0.000252293	0.00246106	0.011938	0	0.00493475	0.00466737	0.00571648	0.00567223	0.01837	0.0236411	0.0490083	0	0.0175839	0.00115195	0	0.00160223	0.0132371	0	0	0	0	0.0411563	0	0	0	0.00514297	0.000471125	0.0541173
767	Bacteria	Firmicutes	Clostridia	Oscillospirales	Eubacterium_coprostanoligenes_group	Eubacterium_coprostanoligenes_group	human_gut	0	0	0	0	0	0	0	0	0	0	0	0.000245761	0.000776294	0	0	0	0	0	0	0	0.00110917	0	0	0	0	0	0	0	0	0	6.30338e-05	0	0	0	0	0	0	0	0	0	0	0
768	Bacteria	Firmicutes	Clostridia	Oscillospirales	Eubacterium_coprostanoligenes_group	Eubacterium_coprostanoligenes_group	uncultured_Clostridiales	0	0	0	0	0	0	0	0	0	0	0	0	0	0	0	0	0	0	0	0	0	0	0	0	0	0	0	0	0	0	0	0	0	8.53777e-05	0	0	0	0.0122968	0	0	0	0
769	Bacteria	Firmicutes	Clostridia	Oscillospirales	Eubacterium_coprostanoligenes_group	Eubacterium_coprostanoligenes_group	uncultured_Clostridium	0	0	0	0	0	0	0	0	0	0	0	0	0	0	0	0	0	0	0	0	0	0	0	0	0	0	0	0	0	0	0	0	0	0	0	0	0	0	0	0	0	0
770	Bacteria	Firmicutes	Clostridia	Oscillospirales	Eubacterium_coprostanoligenes_group	Eubacterium_coprostanoligenes_group	uncultured_bacterium	0	0	0	0	0	0	0	0	0	0	0	0.0115507	4.43597e-05	0	0	0	0	0	0	0	0.000127981	0.000880689	0	0	0	0	0	0	0	0	0.000252135	0	0	0.00110991	0	0	0	0.00485874	0	0.00712104	0	0
771	Bacteria	Firmicutes	Clostridia	Oscillospirales	Eubacterium_coprostanoligenes_group	Eubacterium_coprostanoligenes_group	uncultured_organism	0	0	0	0	0	0	0	0	0	0	0	0	0	0	0	0	0	0	0	0	0	0	0	0	0	0	0	0	0	0	0	0	0	0	0	0	0	0	5.57406e-05	0	0	0
772	Bacteria	Firmicutes	Clostridia	Oscillospirales	Eubacterium_coprostanoligenes_group	Eubacterium_coprostanoligenes_group	uncultured_rumen	0	0	0	0.000147334	0	0	0	0	0	0	0	0	0.00221798	0	0.00019823	0	0	0	0	0	0	0.000223904	0	0	0	0	0	0	0	0	0	0	0.000458526	0	0	0.000161488	0	0.000284926	0	0	0	0
773	Bacteria	Firmicutes	Clostridia	Oscillospirales	uncultured	uncultured	unidentified	0	0	0	3.15716e-05	0	0	0	0.000550886	0	0	0	0	0	0	0	0	0	0	0	4.22386e-05	0.000127981	0	0	0	0	0	0	0	0	0	0.000756406	0	6.11368e-05	0	0	0	0	0	0	0	0	0
774	Bacteria	Firmicutes	Clostridia	Oscillospirales	uncultured	uncultured	metagenome	0	0	0	0	0	0	0	0	0	0	0	0	0	0.000108269	0	0	0	0	0	0	0	0	0	0	0	0	0	0	0	0	0	0	0	0	0	0	0	0	0	0	0	0
775	Bacteria	Firmicutes	Clostridia	Oscillospirales	uncultured	uncultured	uncultured_bacterium	0	0	0	0	0	0	0	0	0	0	0	0	0	0	0	0	0	0	0	0	0	0	0	0	0	0	0	0	0	0	0	0	0	2.27674e-05	0	0	0	0	0	0	0	0
776	Bacteria	Firmicutes	Clostridia	Oscillospirales	uncultured	uncultured	uncultured_rumen	0	0	0	0	0	0	0	0	0	0	0	0	0	0	0	0	0	0	0	0	0	0	0	0	0	0	0	0	0	0	0	0	0	0	0	0	0	0	0	0	0	0
777	Bacteria	Firmicutes	Clostridia	Peptococcales	Peptococcaceae	Peptococcus	unidentified	0	0	0	0	0	0	0.000288409	0	0	0.000388375	0.000742235	0.00212993	0	0	0	0	0.000269647	0	0.000307839	0	0.000511924	0.000238831	0.000219561	0	0	0	0	0	0	0	0	0	0	0	0	0.000346045	0	0	0	0	0	0
778	Bacteria	Firmicutes	Clostridia	Peptococcales	Peptococcaceae	Peptococcus	uncultured_bacterium	0	0	0	0	0	0	0	0	0	0	0	0	0	0	0	0	0	0	0	0	0	0.000164196	0	0	0	0	0	0	0	0	0.00116613	0	0	0.000398429	0	0	0	0	0	0	0	0
779	Bacteria	Firmicutes	Clostridia	Peptococcales	Peptococcaceae	Peptococcus	uncultured_organism	0	0	0	0	0	0	0	0	0	0	0	0	2.21798e-05	0	0	0	0	0	0.000130598	0	0	0	0	0	0	0	0	0	0	0	0.000315169	0	0	0	0	0	0	0	0	0	0	0
780	Bacteria	Firmicutes	Clostridia	Peptococcales	Peptococcaceae	uncultured	unidentified	0	0	0	0	0	0	0	0	0	0	0	0	2.21798e-05	0	0	0	0	0	0	0	0	0	0	0	0	0	0	0	0	0	0	0	0	0	0	0	0	0	0	0	0	6.83515e-05
781	Bacteria	Firmicutes	Clostridia	Peptococcales	Peptococcaceae	uncultured	metagenome	0	0	0	0	0	0	0	0	0	0	0	0	8.87193e-05	0	0	0	0	0	0	0	0	0	0	0	0	0	0	0	0	0	9.45507e-05	0	0	2.27674e-05	0	0	0	0	0	0	0	0
782	Bacteria	Firmicutes	Clostridia	Peptococcales	Peptococcaceae	uncultured	uncultured_Firmicutes	0	0	0	0	0	0	0	0	0	0	0	0	0	0	0	0	0	0	0	0	0	0	0	0	0	0	0	0	0	0	0	0	0	0	0	0	0	0	0	0	0	0
783	Bacteria	Firmicutes	Clostridia	Peptococcales	Peptococcaceae	uncultured	uncultured_bacterium	0	0	0	0.000105239	0	0	0	0.000159935	0	0	0	0.000983043	0.000776294	0.000162404	0	0	0	0	0	0	0	2.98539e-05	0	0	0	0	0	0	0	0	0	0	0	8.53777e-05	0	0	0	0	0	0.000175828	0	0
784	Bacteria	Firmicutes	Clostridia	Peptococcales	Peptococcaceae	uncultured	unidentified	0	0	0	0	0	0	0	0	0	0.00211448	0	0	0	0	0	0	0	0	0	0	0	0	0	0	0	0	0	0	0	0	0.000283652	0	0.000275116	0	0	0	0	0	0	0	0	0
785	Bacteria	Firmicutes	Clostridia	Peptostreptococcales-Tissierellales	Anaerovoracaceae	unidentified	unidentified	0	0	0	0	0	0	0	0	0	0	0	0	0	0	0	0	0	0	0	0	0	0	0	0	0	0	0	0	0	0	0	0	0	0	0	0	0	0	0	0	0	0
786	Bacteria	Firmicutes	Clostridia	Peptostreptococcales-Tissierellales	Anaerovoracaceae	Family_XIII_AD3011_group	unidentified	0	0	0	0	0	0	0	0	0	0	0.000282258	0	2.21798e-05	0	0	0	0	0	0	0	0	0	5.85497e-05	0	0	0	0	0	0	0	0	0	0	0	0	0	0	0	0	0	0	0
787	Bacteria	Firmicutes	Clostridia	Peptostreptococcales-Tissierellales	Anaerovoracaceae	Family_XIII_AD3011_group	gut_metagenome	0	0	0	0.00013681	0	0	0	0	0	0	0	0	0	0	0	0	0	0	0	0	0	0	0	0	0	0	0	0	0	0	0	0	0	0.000233366	0	0	0	0	0	0	0	0
788	Bacteria	Firmicutes	Clostridia	Peptostreptococcales-Tissierellales	Anaerovoracaceae	Family_XIII_AD3011_group	metagenome	0	0	0	0	0	0	0	0	0	0	0	0	0	0	0	0	0	0	0	0	0	0	0	0	0	0	0	0	0	0	0.000189101	0	0	0	0	0	0	0	0	8.7914e-05	0	0
789	Bacteria	Firmicutes	Clostridia	Peptostreptococcales-Tissierellales	Anaerovoracaceae	Family_XIII_AD3011_group	uncultured_Eubacterium	0	0	0	0	0	0	0	0	0	0	0	0	0.000332698	0	0	0	0	0	0	0	0	0	0	0	0	0	0	0	0	0	0	0	0	0	0	0.000115348	0	0	0	0	0	0
790	Bacteria	Firmicutes	Clostridia	Peptostreptococcales-Tissierellales	Anaerovoracaceae	Family_XIII_AD3011_group	uncultured_bacterium	0.000651121	0	0.000430056	0.000347288	0	0	0	0	7.291e-05	0	0	0	0.000465777	0.000419543	0	6.6515e-05	0	0	0	0.000190074	0	0.000492589	0	0	0	0.000132765	0.000383015	0	0	0	0.000346686	0	0	0.000261825	0	0	0	4.49883e-05	0	0.000329678	0	5.12636e-05
791	Bacteria	Firmicutes	Clostridia	Peptostreptococcales-Tissierellales	Anaerovoracaceae	Family_XIII_AD3011_group	uncultured_organism	0	0	0.00111546	0.0011892	0.000443232	0	0.000186618	0.000213246	0	0	0.000428615	0	0.00235106	0.0017323	0.000846984	0.000425696	0	0	4.66422e-05	0.00149947	0.000341282	0.00120908	0.000336661	0	0	0	0.000313376	0.000164564	0	0.000563748	0.00182798	0.000267121	0.00273587	0	0.000567926	0.000530602	0	8.99766e-05	0	0.000901119	0	0.000803131
792	Bacteria	Firmicutes	Clostridia	Peptostreptococcales-Tissierellales	Anaerovoracaceae	Family_XIII_UCG-001	uncultured_Anaerovorax	0	0	0	0	0	0	0	0	0	0	0	0	0	0	0	0	0	0	0	0	0	0	0	0	0	0	0	0	0	0	0	0	0	0	0	0	0	0	0	0	0	0
793	Bacteria	Firmicutes	Clostridia	Peptostreptococcales-Tissierellales	Anaerovoracaceae	Family_XIII_UCG-001	uncultured_bacterium	0	0	0.000241906	0.00032624	0.000166212	0	0	8.88526e-05	0.000178961	0	0	0	2.21798e-05	0	0.000270314	0.000332575	0	0	0	0.000485744	0.000170641	7.46347e-05	7.31872e-05	0	0	0	0.000174098	0.000438837	0	0.00032638	0.000189101	0	0.000213979	0.000250441	0.0002603	0.000484463	0	8.99766e-05	0.000334443	0.000505506	4.95921e-05	0
794	Bacteria	Firmicutes	Clostridia	Peptostreptococcales-Tissierellales	Anaerovoracaceae	Mogibacterium	uncultured_Enterococcus	0	0	0	0	0	0	0	0	0	0	0	0	0	0	0	0	0	0	0	0	0	0	0	0	0	0	0	0	0	0	0	0	0	0	0	0	0	0	0	0	0	0
795	Bacteria	Firmicutes	Clostridia	Peptostreptococcales-Tissierellales	Anaerovoracaceae	Eubacterium_brachy_group	uncultured_bacterium	0	0	0	0	0	0.000282646	0	0	0	0	0	0	0.000243978	0	0	0	0	0	0	0	0	0	0	0	7.10884e-05	0	0	0	0	0	0	0	0	0	0	0	0	0	0	0	0	0
796	Bacteria	Firmicutes	Clostridia	Peptostreptococcales-Tissierellales	Anaerovoracaceae	Eubacterium_nodatum_group	unidentified	0	0	0	0	0	0	0	0	0	0	0	0	0	0	0	0	0	0	0	0	0	0	0	0	0	0	0	0	0	0	0	0	0	0	0	0	0	0	0	0	0	0
797	Bacteria	Firmicutes	Clostridia	Peptostreptococcales-Tissierellales	Anaerovoracaceae	Eubacterium_nodatum_group	Ihubacter_massiliensis	0	0	0	0	0	0	0	0	0	0	0	0	0	0	0	0	0	0	0	0	0	0	0	0	0	9.29356e-05	0	0	0	0	0	0	0	0	0	0	0	0	0	0	0	0
798	Bacteria	Firmicutes	Clostridia	Peptostreptococcales-Tissierellales	Anaerovoracaceae	Eubacterium_nodatum_group	uncultured_organism	0	0	0	0	0	0	0	0	0	0	0	0	0	0	0	0	0	0	0	0	0	0	0	0	0	0	0	0	0	0	0	0	0	0	0	0	0	0	0	0	0	0
799	Bacteria	Firmicutes	Clostridia	Peptostreptococcales-Tissierellales	Anaerovoracaceae	Eubacterium_nodatum_group	unidentified	0	0	0	0	0	0	0	0	0	0	0	0	0	0	0	0	0	0	0	0.000380148	0	0	0	0	0	0	0	0	0	0	0	0	0	8.53777e-05	0	0	0	0	0	0	0	0
800	Bacteria	Firmicutes	Clostridia	Peptostreptococcales-Tissierellales	Peptostreptococcaceae	unidentified	unidentified	0	0	0	0	0	0	0	0	0	0	0	0	2.21798e-05	0	0	0	0	0	0	0	0	0	0	0.000134707	0	0	0	0	0	0	0	0	0	0	0	0	0	0	0	4.3957e-05	0	0
801	Bacteria	Firmicutes	Clostridia	Peptostreptococcales-Tissierellales	Peptostreptococcaceae	Intestinibacter	unidentified	0	0.000160879	0	0	0	0.000339175	0	0	5.96536e-05	0.000107882	0.00010454	0	0.000687575	0	0	0.000172939	0	0.000595214	0	0.00031679	0	0	0	0	0.000255918	0	0	0	0	0	0	0	0	0.000221982	0	0	0	0	0.000139351	0	0	0.000358846
802	Bacteria	Firmicutes	Clostridia	Peptostreptococcales-Tissierellales	Peptostreptococcaceae	Paraclostridium	unidentified	0	0	0	0	0	0	0	0	0	0	0	0	0	0	0	0	0	0	0	0	0	0	0	0	0	0	0	0	0	0	0	0	0	0	0	0	5.08954e-05	0	0	0	0	0
803	Bacteria	Firmicutes	Clostridia	Peptostreptococcales-Tissierellales	Peptostreptococcaceae	Peptoclostridium	uncultured_bacterium	0	0	0	0	0	0	0	0	0	0	0	0	0	0	0	0	0	0	0	0	0	0	0	0	0	0	0	0	0	0	0	0	0	0	0	0	0	0	0	0	0	0
804	Bacteria	Firmicutes	Clostridia	Peptostreptococcales-Tissierellales	Peptostreptococcaceae	Peptostreptococcaceae	uncultured_organism	0	0	0	0	0	0	0	0	0	0	0	0	0	0	0	0	0	0	0	0	0	0	0	0	0	0	0	0	0	0	0	0	0	0	0	0	0	0	0	0	0	0
805	Bacteria	Firmicutes	Clostridia	Peptostreptococcales-Tissierellales	Peptostreptococcaceae	Peptostreptococcus	unidentified	0	0	0	0	0	0	0.000152687	0	0	0	0	0	0	0	0	0	0	0	0	0	0	0	0	0	0	0	0	0	0	0	0	0	0	0	0	0	0	0	0	0	0	0
806	Bacteria	Firmicutes	Clostridia	Peptostreptococcales-Tissierellales	Peptostreptococcaceae	Peptostreptococcus	Peptostreptococcus_anaerobius	0	0	0	0	0	0	0	0	0	0	0	0	0	0	0	0	0	0	0	0	0	0	0	0	0	0	0	0	0	0	0	0	0	0	0	0	0	0	0	0	0	0
807	Bacteria	Firmicutes	Clostridia	Peptostreptococcales-Tissierellales	Peptostreptococcaceae	Romboutsia	unidentified	0	5.36265e-05	0	0.000126287	0.00027702	0	0.000525923	0	0.000192217	0.00023734	0.000324075	0.000655362	0.000709755	0.000406009	0.00019823	0	0.00946218	0.000324662	0	0	0.00162109	0.00117923	0.000380573	0	0.000454966	0	0.000156688	0.0024136	0.000979566	0.000267039	0	0	0.000198695	0.000227674	0	0	0	0	0.000473795	0	0	0.00032467
808	Bacteria	Firmicutes	Clostridia	Peptostreptococcales-Tissierellales	Peptostreptococcaceae	Terrisporobacter	uncultured_bacterium	0	0	0	0	0	0	0	0	0	0	0	0	0	0	0	0	0	0	0	8.44773e-05	0	0	0	0	0	6.63825e-05	0	0	0	0	0	0	0	0.000261825	0	0	0	0	0	0	0	0
809	Bacteria	Firmicutes	Clostridia	Peptostreptococcales-Tissierellales	Peptostreptococcaceae	uncultured	unidentified	0	0	0	0	0	0	0	0	0	0	0	0	0	0	0	0	0.000171594	0	0	0	0	0	0	0	0	0	0	0	0	0	0	0	0	0	0	0	0	0	0	0	0	0
810	Bacteria	Firmicutes	Clostridia	Peptostreptococcales-Tissierellales	Peptostreptococcales-Tissierellales	Anaerococcus	Anaerococcus_vaginalis	0	0	0	0	0	0	0	0	0	0	0	0	0	0	0	0	0	0	0	0	0	0	0	0	0	0	0	0	0	0	0	0	0	0	0	0	0	0	0	0	0	0
811	Bacteria	Firmicutes	Clostridia	Peptostreptococcales-Tissierellales	Peptostreptococcales-Tissierellales	Fenollaria	unidentified	0	0	0	0	0	0	0	0	0	0	0	0	2.21798e-05	2.70673e-05	0	7.9818e-05	0	0	0	0	0	0	0	0	5.68707e-05	0	0	0	0	0	0	0	9.17053e-05	0	0	0	0	0	0	0	0	0
812	Bacteria	Firmicutes	Clostridia	Peptostreptococcales-Tissierellales	Peptostreptococcales-Tissierellales	Fenollaria	uncultured_bacterium	0	0	0	0	0	0	0	0	0	0	0	0	0	0	0	0	0	0	0	0	0	0	0	0	0	0	0	0	0	0	0	0	0	0	0	0	0	0	0	0	0	0
813	Bacteria	Firmicutes	Clostridia	Peptostreptococcales-Tissierellales	Peptostreptococcales-Tissierellales	Finegoldia	unidentified	0	0	0	0	0	0	0	0	0	0	0	0	0	0	0	0	0	0	0	0	0	0	0	0	0	0	0	0	0	0	0	0	0	0	0	0	0	0	0	0	0	0
814	Bacteria	Firmicutes	Clostridia	Peptostreptococcales-Tissierellales	Peptostreptococcales-Tissierellales	Murdochiella	Murdochiella_asaccharolytica	0	0	0	0	0	0	0	0	0	0	0	0	0	0	0	0	0	0	0	0	0	0	0	0	0	0	0	0	0	0	0	0	0	0	0	0	0	0	0	0	0	0
815	Bacteria	Firmicutes	Clostridia	Peptostreptococcales-Tissierellales	Peptostreptococcales-Tissierellales	Peptoniphilus	unidentified	0	0	0	0	0	0	0	0	0	0	0	0	0	0	0	0	0	0	0	0	0	0	0	0	0	0	0	0	0	0	0	0	0	0	0	0	0	0	0	0	0	0
816	Bacteria	Firmicutes	Clostridia	Peptostreptococcales-Tissierellales	Peptostreptococcales-Tissierellales	Peptoniphilus	Peptoniphilus_lacrimalis	0	5.36265e-05	0	0	0	0	0	0	0	0	0	0	0	0	0	0	0	0	0	0	0	0	0	0	0	0	0	0	0	0	0	0	0	0	0	0	0	0	0	0	0	0
817	Bacteria	Firmicutes	Clostridia	uncultured	uncultured	uncultured	uncultured_organism	0	0	0	0	0.000484785	0	0	0.000995149	0	0	0	0	2.21798e-05	0	0	0	0	0	0	0	0	0	0	0	0	0	0	0	0	0	0	0	0	2.27674e-05	0	0	0	0	0	0	0	0
818	Bacteria	Firmicutes	Incertae_Sedis	DTU014	DTU014	DTU014	unidentified	0	0	0	7.36672e-05	0	0	0	0.000231017	0	0	0	0	0.000133079	0	0	0	0	0	0	0.000190074	0	0	0	0	0	0	0	0	0	0	0.000157585	0	0	0.000233366	0	0	0	0.000104973	0	0.000241764	0	0
819	Bacteria	Firmicutes	Negativicutes	Acidaminococcales	Acidaminococcaceae	Acidaminococcus	unidentified	0	0	0	0	0	0	0	0	0	0	0	0	0	0	0	0	0	0	0	0	0	0	0	0	0	0	0	0	0	0	0	0	0	0	0	0	0	0	0	0	0	0.00143538
820	Bacteria	Firmicutes	Negativicutes	Acidaminococcales	Acidaminococcaceae	Acidaminococcus	Acidaminococcus_fermentans	0	0	0	0	0	0	0	0	0	0	0	0	0	0.00392475	0	0	0	0	0	0	0	0	0	0	0	0	0	0	0	0	0	0	0	0	0	0.00272222	0	0	0	0	0	0
821	Bacteria	Firmicutes	Negativicutes	Acidaminococcales	Acidaminococcaceae	Acidaminococcus	uncultured_rumen	0	0	0	0	0	0	0	0	0	0	0	0	0	0	0	0	0	0	0	0	0	0	0	0	0	0	0	0	0	0	0	0	0	0	0	0	0	0	0	0	0	0.00023923
822	Bacteria	Firmicutes	Negativicutes	Acidaminococcales	Acidaminococcaceae	Phascolarctobacterium	unidentified	0	0	2.68785e-05	0	0.000900314	0	0.0036645	0	0	0	0	0	0	0	0	0	0	0	0	0.0110665	0	0.00240324	0	0.125817	0	0	0	0.0746023	0	0	0.00970721	0	0.000137558	0	0	0	0	0.000314918	0	0.0209455	0	0
823	Bacteria	Firmicutes	Negativicutes	Acidaminococcales	Acidaminococcaceae	Phascolarctobacterium	Phascolarctobacterium_faecium	0	0.0637351	0.0230617	0.0391488	0	0.0972866	0	0.0170242	0.000861663	0	0.00228943	0	0	0	0.0227965	0	0.000661862	0	0.024851	0.000422386	0.000255962	0	7.31872e-05	0	0	0	0.00915754	0	0.056046	0.013708	0	0.0840429	0.0238281	0.0280494	0.00106486	0.000138418	0	0	0	0	0.000272757	0.000427197
824	Bacteria	Firmicutes	Negativicutes	Acidaminococcales	Acidaminococcaceae	Phascolarctobacterium	Phascolarctobacterium_succinatutens	0	0	0	0	0	0	0	0	0	0	0	0	0	0	0	0	0	0	0	6.3358e-05	0	0	0	0	0	0	0	0	0	0	0	0	0	0	0	0	0	0	0	6.59355e-05	0	0
825	Bacteria	Firmicutes	Negativicutes	Acidaminococcales	Acidaminococcaceae	Phascolarctobacterium	Ruminococcus_sp.	0	0	0	0	0	0	0	0	0	0	0	0	0	0	0	0	0	0	2.79853e-05	0	0	0	0	0	0	0	0	0	0	0	0	0	0	0	0	0	0	0	0	0	0	0
826	Bacteria	Firmicutes	Negativicutes	Acidaminococcales	Acidaminococcaceae	Phascolarctobacterium	uncultured_Firmicutes	0	0	0	0	0	0	0	0	0	0	0	0	0	0	0.0103801	0	0	0	0	0	0	0	0	0	0	0	0	0	0	0	0.000315169	0	0	0	0	0	0	0	0	0	0	0
827	Bacteria	Firmicutes	Negativicutes	Acidaminococcales	Acidaminococcaceae	Phascolarctobacterium	uncultured_bacterium	0	0	0	0	0.00364281	0	0.00100095	0	0	0	0	0	0	0	0	0	0	0	0	0	0	0.0110011	0	0	0	0	0	0	0	0	0.00208012	0	0	0	0	0	0	0	0	0.00514297	0	0
828	Bacteria	Firmicutes	Negativicutes	Acidaminococcales	Acidaminococcaceae	Succiniclasticum	uncultured_bacterium	0	0	0	0	0	0	0	0	0	0	0	0	0	0	0	0	0	0	0	0	0	0	0	0	0	0	0	0	0	0	0	0	0	0	0	0	0	0	0	0	0	0
829	Bacteria	Firmicutes	Negativicutes	Veillonellales-Selenomonadales	Selenomonadaceae	Megamonas	unidentified	0.00321491	0	0.00788883	0	0.00314417	0	0	0	0	0.000151035	0	0	0	0.00170524	0	5.3212e-05	0	0	0	0.000337909	0	0	0	0	0	0	0	0	0	0.00139453	0.000189101	0	0.00126859	0	0	0.00246845	0	0	0	0	0	0
830	Bacteria	Firmicutes	Negativicutes	Veillonellales-Selenomonadales	Selenomonadaceae	Megamonas	Megamonas_funiformis	0.00305213	0	0.00147832	0	0.00106653	0	0	0	0	0	0	0	0	0	0	0.000891301	0	0	0	0	0	0.00019405	0	0	0.00580081	0	0	0	0	0	0	0	0	0	0	0	0	0	0	0	0	0
831	Bacteria	Firmicutes	Negativicutes	Veillonellales-Selenomonadales	Selenomonadaceae	Megamonas	uncultured_Clostridiales	0	0	0	0	0	0	0	0	0	0	0	0	0	0	0	0	0	0	0	0	0	0	0	0	0	0	0	0	0	0	0	0	0	0	0	0	0	0	0	0	0	0
832	Bacteria	Firmicutes	Negativicutes	Veillonellales-Selenomonadales	Selenomonadaceae	Megamonas	uncultured_organism	0.0102959	0	0.00124985	0	0.00378132	0	0	0	0	0	0	0	0	0.00129923	0	0.00143672	0	0	0	0.00137276	0.000767885	0.0031048	0	0	0.00368238	0.000119489	0	0	0	0	0.00107157	0	0.00244547	0	0	0.00389877	0	0	0	0	0.000892658	0
833	Bacteria	Firmicutes	Negativicutes	Veillonellales-Selenomonadales	Selenomonadaceae	Mitsuokella	unidentified	0	0	0	0	0	0	0	0	0	0	0	0.000245761	0	0	0	0.000212848	0	0	0	0	0	0	0	0	0	0	0	0.0041141	0	0	0	0	0	0	0	0	0	0	0	0.000747269	0	0
834	Bacteria	Firmicutes	Negativicutes	Veillonellales-Selenomonadales	Selenomonadaceae	Mitsuokella	uncultured_bacterium	0	0	0	0	5.5404e-05	0	0	0	0	0	0	0.00589826	0	0.000338341	0	0.000226151	0	0	0	0	0	0	0	0	0.000213265	0	0	0.0115743	0	0	0.000315169	0	0	0	0	0.00198399	0	4.49883e-05	0	0.00325282	0	0
835	Bacteria	Firmicutes	Negativicutes	Veillonellales-Selenomonadales	Selenomonadaceae	Selenomonas	unidentified	0	0	0	0	0	0	0	0	0	0	0	0	0	0	0	0	0	0	0	0	0	0	0	0	0	0	0	0	0	0	0	0	0	0	0	0	0	0	0	0	0	0
836	Bacteria	Firmicutes	Negativicutes	Veillonellales-Selenomonadales	Selenomonadaceae	uncultured	uncultured_organism	0	0	0	0	0	0	0	0	0	0	0	0	0	0	0	0	0	0	0	0	0	0	0	0	0	0	0	0	0	0	0	0	0	0	0	0	0	0	0.00157467	0	0	0
837	Bacteria	Firmicutes	Negativicutes	Veillonellales-Selenomonadales	Veillonellaceae	Allisonella	Allisonella_histaminiformans	0	0	0	0	0	0	0	0	0	0	0	0	0	0	0	0	0	0	0	0	0	0	0	0	0	0	0	0	0	0	0	0	0	0	0	0	0	0	0	0	0	0
838	Bacteria	Firmicutes	Negativicutes	Veillonellales-Selenomonadales	Veillonellaceae	Allisonella	uncultured_bacterium	0	0	0	0	0.000401679	0	0	0	0	0	0.000198626	0	0	6.76682e-05	0	0	0	0	0	0	0.000170641	0	0	0	0	0.000172595	0.000121868	0.000438837	0	0	0	0	0	0	0	0	0	0	0	0	0.000545513	0
839	Bacteria	Firmicutes	Negativicutes	Veillonellales-Selenomonadales	Veillonellaceae	Dialister	unidentified	0.0155862	0	0	0	0	0	0	0	0	0	0	0.00327681	0.00578894	0.00190824	0	0.00246106	0.00330931	0	0	0	0.00499125	0	0	0	0	0.003505	0	0	0	0	0	0	0	0	0.023214	0.0119962	1.45415e-05	0.00980745	0	0	0	0
840	Bacteria	Firmicutes	Negativicutes	Veillonellales-Selenomonadales	Veillonellaceae	Dialister	Dialister_invisus	0	0	0	0	0	0	0	0	0	0.0212743	0	0	0	0	0	0	0	0	0.000149255	0	0	0	0	0	0.00818938	0	0.000365605	0	0	0	0	0	0	0.000221982	0	0	0	0	0.0290408	0	0	0.0131064
841	Bacteria	Firmicutes	Negativicutes	Veillonellales-Selenomonadales	Veillonellaceae	Dialister	Dialister_propionicifaciens	0	0	0	0	0	0	0	0	0	0	0	0	0	0	0	0	0	0	0	0	0	0	0	0	0	0	0	0	0	0	0	0	0	0	0	0	0	0	0	0	0	0
842	Bacteria	Firmicutes	Negativicutes	Veillonellales-Selenomonadales	Veillonellaceae	Dialister	Dialister_sp.	0.0105807	0	0	0	0	0	0	0	0	0	0.0127644	0	0	0	0	0	0.0105653	0	0	0	0	0	0	0	0	0.0129844	0	0	0	0	0	0	0	0	0.0145768	0	0.122883	0	0	0	0	0
843	Bacteria	Firmicutes	Negativicutes	Veillonellales-Selenomonadales	Veillonellaceae	Dialister	Dialister_succinatiphilus	0	0	0	0	0	0	0	0	0	0	0	0	2.21798e-05	0	0	0.00404411	0	0	0	0	0	0	0	0	0	0	0	0	0	0	0	0	0	0	0	0	0	4.49883e-05	0	0	0	0
844	Bacteria	Firmicutes	Negativicutes	Veillonellales-Selenomonadales	Veillonellaceae	Dialister	gut_metagenome	0	0	0	0	0	0	0	0	0	0	7.31781e-05	0	0	0	0	0	0	0	0	0	0	0	0	0	0	0	0	0	0	0	0	0	0	0	0	0	0	0	0	0	0	0
845	Bacteria	Firmicutes	Negativicutes	Veillonellales-Selenomonadales	Veillonellaceae	Dialister	uncultured_bacterium	0	0	0	0	0	0	0	0	0.0048452	0	0	0	0.00144169	0.00549465	0	0	0	0	0	0	0	0	0.00420094	0	0	0	0	0	0	0	0	0	0	0	0	0	0	0	0	0	0.0323341	0
846	Bacteria	Firmicutes	Negativicutes	Veillonellales-Selenomonadales	Veillonellaceae	Megasphaera	unidentified	0	0	0	0	0	0	0	0	0	0	0	0	0	0	0	0	0	0	0	0	0	0	0	0	0	0	0	0	0	0	0	0	0	0	0	0.00159181	0.00148324	0	0	0	0	0
847	Bacteria	Firmicutes	Negativicutes	Veillonellales-Selenomonadales	Veillonellaceae	Megasphaera	Megasphaera_elsdenii	0	0	0	0	0	0	0	0	0	0	0	0	0	0.00969008	0	0	0	0	0	0	0.000511924	0	0	0	0	0	0	0	0	0	0.000378203	0	0	0	0	0.0106351	0.00964104	0	0	0	0	0
848	Bacteria	Firmicutes	Negativicutes	Veillonellales-Selenomonadales	Veillonellaceae	Megasphaera	Megasphaera_hexanoica	0	0	0	0	0	0	0	0	0	0	0	0	0	0.000757883	0	0	0	0	0	0	0	0.000134342	0	0	0	0	0	0	0	0	0	0	0	0	0	0	0	0	0	0	0	0
849	Bacteria	Firmicutes	Negativicutes	Veillonellales-Selenomonadales	Veillonellaceae	Megasphaera	Megasphaera_micronuciformis	0	0	0	0	0	0	0	0	0	0	0	0	0	0	0	0	0	0	0	0	0	0	0	0	0	0	0	0	0	0	0	0	0	0	0	0	0	0	0	0	0	0
850	Bacteria	Firmicutes	Negativicutes	Veillonellales-Selenomonadales	Veillonellaceae	Megasphaera	Megasphaera_stantonii	0	0	0	0	0	0.00166761	0	0	0	0	0	0	0	0	0	0	0	0	0	0	0	0	0	0	0	0	0	0	0	0	0	0	0	0	0	0	0	0	0	0	0	0
851	Bacteria	Firmicutes	Negativicutes	Veillonellales-Selenomonadales	Veillonellaceae	Veillonella	unidentified	0.000529036	0.000536265	0.000241906	4.20955e-05	0	0	0.00307071	0	0.000490485	0.00207133	0.000543609	0	2.21798e-05	0	0.000216251	0.000199545	0	0.00133923	0.000429108	0.000105597	0.000682565	0.000328393	4.39123e-05	0	0	0	0.00163652	0	8.67969e-05	0.0105925	0	0.00013356	0	0.000620411	0	0	0.000443517	0.000314918	0.000320508	0.000109893	0.029061	0.000495549
852	Bacteria	Firmicutes	Negativicutes	Veillonellales-Selenomonadales	Veillonellaceae	Veillonella	Veillonella_atypica	0	0	0	0	0	0	0.00113667	0	0.000238614	0	0	0	0	0	0	0	0	0	0	0	0	0	0	0	0	0	0.000435244	0	0	0	0	0	0	6.83021e-05	0	0	0	0	0	0	0.00694289	0
853	Bacteria	Firmicutes	Negativicutes	Veillonellales-Selenomonadales	Veillonellaceae	Veillonella	Veillonella_parvula	0	0	0	0	0	0	0	0	0	0	0	0	0	0	0	0	0	0	0	0	0	0	0	0	0	0	0	0	0	0.000682432	0	0	0	0	0	0	0	0	0	0	0	0.000205055
854	Bacteria	Firmicutes	Negativicutes	Veillonellales-Selenomonadales	Veillonellaceae	Veillonella	Veillonella_ratti	0	0	0	0	0	0	0	0	0	0	0	0	0	0	0	0	0	0	0	0	0	0	0	0	0	0	0	0	0	0	0	0	0	0	0	0	0	0	0	0	0	0
855	Bacteria	Firmicutes	Negativicutes	Veillonellales-Selenomonadales	Veillonellaceae	Veillonella	Veillonella_seminalis	0	0	0	0	0	0	0	0	0	0	0	0	0	0	0	0	0	0	0	0	0	0	0	0	0	0	0	0	0	0	0	0	0	0	0	0	0	0	0	0	0	0
856	Bacteria	Firmicutes	Negativicutes	Veillonellales-Selenomonadales	Veillonellaceae	Veillonella	uncultured_Firmicutes	0	0	0	0	0	0	0	0	0	0	0	0	0	0	0	0	0	0	0	0	0	0	0	0	0	0	0	0	0	8.90128e-05	0	0	0	0	0	0	0	0	0	0	0	0
857	Bacteria	Firmicutes	Negativicutes	Veillonellales-Selenomonadales	Veillonellaceae	Veillonella	uncultured_methanogenic	0	0	0	0	0	0	0	0	0	0	0	0	0	0	0	0	0	0	0	0	0	0	0	0	0	0	0	0	0	0	0	0	0	0	0	0	0	0	0	0	0.000843066	0
858	Bacteria	Firmicutes	Negativicutes	Veillonellales-Selenomonadales	Veillonellaceae	uncultured	uncultured_bacterium	0	0	0	0	0	0	0	0	0	0	0	0	0	0	0	0	0	0	0	0	0	0	0	0	0.00018483	0	0	0	0	0	0	0	0	0	0	0	0	0	0	0	0	0.000871482
859	Bacteria	Firmicutes	uncultured	uncultured	uncultured	uncultured	unidentified	0	0	0	0	0	0	0	0	0	0	0	0	0	0	0	0	0	0	0	0	0	0	0	0	0	0	0	0	0	0	0	0	0	2.27674e-05	0	0	0	0	0	0	0	0
860	Bacteria	Firmicutes	uncultured	uncultured	uncultured	uncultured	uncultured_Peptococcaceae	0.00024417	0	0	0	0	0	0	0	0	0	0	0	0	0	0	0	0	0	0	0	0	0	0	0	0	0	0	0	0	0	0	0	0	0	0	0	0	0	0	0	0	0
861	Bacteria	Fusobacteriota	Fusobacteriia	Fusobacteriales	Fusobacteriaceae	Fusobacterium	unidentified	0	0	0	0	0	0	0	0	0	0	0	0	0	0	0	0	0	0	0	0	0	0	0	0	0	0	0	0	0	0	0	0	0	0	0	0	5.81662e-05	0	2.78703e-05	0	0	0
862	Bacteria	Fusobacteriota	Fusobacteriia	Fusobacteriales	Fusobacteriaceae	Fusobacterium	Fusobacterium_mortiferum	0	0	0	0	0	0	0	0.000568656	0	0	0	0	0	0	0	0	0	0	0	0	0	0	0	0	0	0	0	0	0.14758	0	0	0	0	0	0	0	0.108487	0	0	8.7914e-05	0	0
863	Bacteria	Fusobacteriota	Fusobacteriia	Fusobacteriales	Fusobacteriaceae	Fusobacterium	Fusobacterium_necrogenes	0	0	0	0	0	0	0	3.5541e-05	0	0	0	0	0	0	0	0	0	0	0	0	0	0	0	0	0	0	0	0	0	0	0	0	0	0	0	0	0	0	0	0	0	0
864	Bacteria	Fusobacteriota	Fusobacteriia	Fusobacteriales	Fusobacteriaceae	Fusobacterium	Fusobacterium_nucleatum	0	0.000107253	0	0	0	0	0	0	0	0	0	0	0	0	0	0	0	0	0	0	0	0	0	0	0	0	0	0	0	0	0	0	0	0	0	0	0	0	0	0	0	0
865	Bacteria	Fusobacteriota	Fusobacteriia	Fusobacteriales	Fusobacteriaceae	Fusobacterium	Fusobacterium_periodonticum	0	0	0	0	0	0	0	0	0	0	0	0	0	0	0	0	0	0	0	0	0	0	0	0	0	0	0	0	0	0	0	0	0	0	0	0	5.81662e-05	0	0	0	0.00101664	0
866	Bacteria	Fusobacteriota	Fusobacteriia	Fusobacteriales	Fusobacteriaceae	Fusobacterium	Fusobacterium_ulcerans	0	0	0	0	0	0.00336348	0	0	0	0	0	0	0	0	0	0	0	0	0	0	0	0	0	0	0	0	0	0	0	0	0	0	0	0	0	0	0	0	0.00540684	0	0	0
867	Bacteria	Fusobacteriota	Fusobacteriia	Fusobacteriales	Fusobacteriaceae	Fusobacterium	Fusobacterium_varium	0	0.00126022	0	0	0	0	0	0	0	0	0	0	0	0	0	0	0	0	0	0	0	0	0	0	0	0	0	0	0	0	0.000126068	0.00500851	0	0	0	0	0	0	0	0	0	0
868	Bacteria	Fusobacteriota	Fusobacteriia	Fusobacteriales	Fusobacteriaceae	Fusobacterium	gut_metagenome	0	0	0	0	0	0	0	0	0	0	0	0	0	0	0	0	0	0	0	0	0	0	0	0	0	0	0	0	0	0	0	0	0	0	0	0	0	0	0	0	0	0
869	Bacteria	Fusobacteriota	Fusobacteriia	Fusobacteriales	Leptotrichiaceae	Leptotrichia	unidentified	0	0	0	0	0	0	0	0	0	0	0	0	0	0	0	0	0	0	0	0	0	0	0	0	0	0	0	0	0	0	0	0	0	0	0	0	0	0	0	0	0.000198368	0
870	Bacteria	Fusobacteriota	Fusobacteriia	Fusobacteriales	Leptotrichiaceae	Leptotrichia	Leptotrichia_sp.	0	0	0	0	0	0	0.000203583	0	0	0	0	0	0	0	0	0	0	0	0	0	0	0	0	0	0	0	0	0	0	0	0	0	0	0	0	0	0.000407163	0	0	0	0.000421533	0
871	Bacteria	Fusobacteriota	Fusobacteriia	Fusobacteriales	Leptotrichiaceae	Sneathia	Sneathia_amnii	0	0	0	0	0	0	0	0	0	0	0	0	0	0	0	0	0	0	0	0	0	0	0	0	0.0002417	0	0	0	0	0	0	0	0	0	0	0	0	0	0	0	0	0
872	Bacteria	Fusobacteriota	Fusobacteriia	Fusobacteriales	Leptotrichiaceae	Sneathia	Sneathia_sanguinegens	0	0	0	3.15716e-05	0	0	0	0	0	0	0	0	0	0	0	0	0	0	0	0.000168955	0	0	0	0	0	0	0	0	0	0	0	0	0	0	0	0	0	0	0	0	0	0
873	Bacteria	Patescibacteria	Saccharimonadia	Saccharimonadales	Saccharimonadaceae	Saccharimonadaceae	uncultured_bacterium	0	0	0	0	0	0	0	0	0	0	0	0	0	0	0	0	0	0	0	0	0	0	0	0	0	0	0	0	0	0	0	0	0	0	0	0	0	0	0	0	0	0
874	Bacteria	Patescibacteria	Saccharimonadia	Saccharimonadales	Saccharimonadaceae	TM7x	uncultured_bacterium	0	0.000160879	0	9.47149e-05	5.5404e-05	0.00031091	0	0	1.98845e-05	0	0	0	0	0	0	0	0	0	0	0	0	0	0	0	5.68707e-05	0	0	0	0	0	0	0	0	0	0	0	5.08954e-05	0	0	0	0	6.83515e-05
875	Bacteria	Patescibacteria	Saccharimonadia	Saccharimonadales	Saccharimonadales	Saccharimonadales	TM7_phylum	0	0	0	0	0	0	0	0	0	0	0	0	0	0	0	0	0	0	0	0	0	0	0	0	0	0	0	0	9.91965e-05	0	0	0	0	0	0	0	0	0	0	0	0	0
876	Bacteria	Planctomycetota	Phycisphaerae	MSBL9	SG8-4	SG8-4	unidentified	0	0	0	0	0	0	0	0	0	0	0	0	0	0	0	0	0	0	0	0	0	0	0	0	0	0	0	0	0	0	0	0	0	0	0	0	0	0	0	0	0	0
877	Bacteria	Proteobacteria	Alphaproteobacteria	Caulobacterales	Caulobacteraceae	Brevundimonas	unidentified	0	0	0	0	0	0	0	0	0	0	0	0	0	0	0	0	0	0	0	0	0	0	0	0	0	0	0	0	0	0	0	0	0	0	0	0	0	0	0	0	0	0
878	Bacteria	Proteobacteria	Alphaproteobacteria	Caulobacterales	Caulobacteraceae	Brevundimonas	Brevundimonas_diminuta	0	0	0	0	0	0	0	0	0	0	0	0	0	0	0	0	0	0	0	0	0	0	0	0	0	0	0	0	0	0	0	0	0	0	0	0	0	0	0	0	0	0
879	Bacteria	Proteobacteria	Alphaproteobacteria	Caulobacterales	Hyphomonadaceae	Hyphobacterium	bacterium_p14	0	0	0	0	0	0	0	0	0	0	0	0	0	0	0	0	0	0	0	0	0	0	0	0	0	0	0	0	0	0	0	0	0	0	0	0	0	0	0	0	0	0
880	Bacteria	Proteobacteria	Alphaproteobacteria	Kiloniellales	Kiloniellaceae	uncultured	uncultured_beta	0	0	0	0	0	0	0	0	0	0	0	0	0	0	0	0	0	0	0	0	0	0	0	0	0	0	0	0	0	0	0	0	0	0	0	0	0	0	0	0	0	0
881	Bacteria	Proteobacteria	Alphaproteobacteria	Rhizobiales	Beijerinckiaceae	Bosea	unidentified	0	0	0	0	0	0	0	0	0	0	0	0	2.21798e-05	0	0	0	0	0	0	0	0	0	0	0	0	0	0	0	0	0	0	0	0	0	0	0	0	0	0	0	0	0
882	Bacteria	Proteobacteria	Alphaproteobacteria	Rhizobiales	Rhizobiaceae	unidentified	unidentified	0	0	0	0	0	0	0	0	0	0	0	0	0	0	0	0	0	0	0	0	0	0	0	0	0	0	0	0	0	0	0	0	0	0	0	0	0	0	0	0	0	0
883	Bacteria	Proteobacteria	Alphaproteobacteria	Rhizobiales	Rhizobiaceae	Ochrobactrum	unidentified	0	0	0	0	0	0	0	0	0	0	0	0	0	0	0	0	0	0	0	0	0	0	0	0	0	0	0	0	0	0	0	0	0	0	0	0	0	0	0	0	0	0
884	Bacteria	Proteobacteria	Alphaproteobacteria	Rhizobiales	Rhizobiaceae	Pseudochrobactrum	unidentified	0	0	0	0	0	0	0	0	0	0	0	0	0	0	0	0	0	0	0	0	0	0	0	0	0	0	0	0	0	0	0	0	0	0	0	0	0	0	0	0	0	0
885	Bacteria	Proteobacteria	Alphaproteobacteria	Rhizobiales	Xanthobacteraceae	unidentified	unidentified	0	0	0	0	0	0	0	0	0	0	0	0	0	0	0	0	0	0	0	0	0	0	0	0	0	0	0	0	0	0	0	0	0	0	0	0	0	0	0	0	0	0
886	Bacteria	Proteobacteria	Alphaproteobacteria	Rhizobiales	Xanthobacteraceae	Rhodopseudomonas	uncultured_bacterium	0	0	0	0	0	0	0	0	0	0	0	0	0	0	0	0	0	0	0	0	0	0	0	0	0	0	0	0	0	0	0	0	0	0	0	0	0	0	0	0	0	0
887	Bacteria	Proteobacteria	Alphaproteobacteria	Rhodobacterales	Rhodobacteraceae	Paracoccus	unidentified	0	0	0	0	0	0	0	0	0	0	0	0	0	0	0	0	0	0	0	0	0	0	0	0	0	0	0	0	0	0	0	0	0	0	0	0	0	0	0	0	0	0
888	Bacteria	Proteobacteria	Alphaproteobacteria	Rhodospirillales	uncultured	uncultured	unidentified	0.0282017	0	0	0	0	0	0	0	0	0	0	0	0	0	0	0	0	0	0	0	0	0	0	0	0	0	0	0	0	0	0.00091399	0.00290494	0	0	0	0	0	0	0	0	0	0
889	Bacteria	Proteobacteria	Alphaproteobacteria	Rhodospirillales	uncultured	uncultured	Azospirillum_sp.	0	0	0	0	0	0	0	0	0	0	0	0	0	0	0	0	0	0	0	0	0	0	8.78246e-05	0	0	0	0	0	0	0	0	0	0	0	0	0	0	0	0	0	0	0
890	Bacteria	Proteobacteria	Alphaproteobacteria	Rhodospirillales	uncultured	uncultured	gut_metagenome	0	0	0	0	0	0	0	0	0	0	0	0	0	0	0	0.0310891	0.063073	0	0	0	0	0	0	0	0	0	0	0	0	0	0	0	0.000366821	0	0	0	0	0	0	0	0	0
891	Bacteria	Proteobacteria	Alphaproteobacteria	Rhodospirillales	uncultured	uncultured	uncultured_bacterium	0	0	0	0	0	0	0	0	0	0	0	0	0	0	0	0	0	0	0	0	0	0	0	0	0	0	0	0	0	0	0	0	0	0	0	0	0	0.00112471	0	0	0	0
892	Bacteria	Proteobacteria	Alphaproteobacteria	Rickettsiales	Mitochondria	Mitochondria	unidentified	0	0	0	0	0	0	0	0	0	0	0	0	2.21798e-05	0	0	0	0	0	0	0	0	0	0	0	0	0	0	0	0	0	0	0	0.000106989	0	0	0	0	0	0	0	0	0
893	Bacteria	Proteobacteria	Alphaproteobacteria	Rickettsiales	Mitochondria	Mitochondria	Fragaria_x	0	0	0	0	0	0	0	0	0	0	0	0	0	0	0	0	0	0	0	0	0	0	0	0	0	0	0	0	0	0	0	0	0	0	0	0	0	0.000179953	0	0	0	0
894	Bacteria	Proteobacteria	Alphaproteobacteria	Rickettsiales	Mitochondria	Mitochondria	Persicaria_minor	0	0	0	0	0	0	0	0	0	0	0	0	0	0	0	0	0	0	0	0	0	0	0	0	0	0	0	0	0	0	0	0	0	0	0	0	0	0	0	0	0	0
895	Bacteria	Proteobacteria	Alphaproteobacteria	Sphingomonadales	Sphingomonadaceae	Sphingobium	Sphingobium_xenophagum	0	0	0	0	0	0	0	0	0	0	0	0	0	0	0	0	0	0	0	0	0	0	0	0	0	0	0	0	0	0	0	0	0	0	0	0	0	0	0	0	0	0
896	Bacteria	Proteobacteria	Gammaproteobacteria	Aeromonadales	Aeromonadaceae	Aeromonas	unidentified	0	0	0	0	0	0	0	0	0	0	0	0	0	0	0	0	0	0	0	0	0	0	0	0	0	0	0	0	0	0	0	0	0	0	0	0	0	0	0	0	0	0
897	Bacteria	Proteobacteria	Gammaproteobacteria	Aeromonadales	Succinivibrionaceae	unidentified	unidentified	0	0	0	0	0	0	0	0	0	0	0	0	0	0	0	0	0	0	0	0	0	0	0	0	0	0	0	0	0	0	0	0	0	0	0	0	0	0	0	0	0	0
898	Bacteria	Proteobacteria	Gammaproteobacteria	Aeromonadales	Succinivibrionaceae	Succinatimonas	Succinatimonas_hippei	0	0	0	0	0	0	0	0	0	0	0	0	0	0	0	0	0	0	0	0	0	0.000223904	0	0	0	0	0	0	0	0	0	0	0	0	0	0	0	0	0	0	0	0
899	Bacteria	Proteobacteria	Gammaproteobacteria	Aeromonadales	Succinivibrionaceae	Succinivibrio	unidentified	0	0	0	0	0	0	0	0	0	0	0	0	0	0	0	0	0	0	0	0	0	0	0	0	0	0	0	0	0	0	0	0	0.001452	0	0	0	0	0	0	0.00169234	0.00265318	0
900	Bacteria	Proteobacteria	Gammaproteobacteria	Aeromonadales	Succinivibrionaceae	Succinivibrio	uncultured_bacterium	0	0	0	0	0	0	0	0.00111954	0	0	0	0	0	0	0	0	0	0	0	0	0	0	0	0	0	0	0	0	0	0	0	0	0	0	0	0	0	0	0	0	0	0
901	Bacteria	Proteobacteria	Gammaproteobacteria	Aeromonadales	Succinivibrionaceae	uncultured	uncultured_bacterium	0	0	0	0	0	0	0	0	0	0	0	0	0	0	0	0	0	0	0	0	0	0	0	0	0	0	0	0	0	0	0	0	0	0	0	0	0	0	0	0	0	0
902	Bacteria	Proteobacteria	Gammaproteobacteria	Burkholderiales	Burkholderiaceae	Ralstonia	unidentified	0	0	0	0	0	0	0	0	0	0	0	0	4.43597e-05	0	0	0	0	0	0	0	0	0	4.39123e-05	0	0	3.98295e-05	0	0	0	0	0	0	0	0	0	0	0	0	0	0	0	0
903	Bacteria	Proteobacteria	Gammaproteobacteria	Burkholderiales	Comamonadaceae	Comamonas	unidentified	0	0	0	0	0	0	0	0	0	0	0	0	0	0	0	0	0	0	0	0	0	0	0	0	0	0	0	0	0	0	0	0	0	0	0	0	0	0	0	0	0	0
904	Bacteria	Proteobacteria	Gammaproteobacteria	Burkholderiales	Comamonadaceae	Comamonas	Comamonas_kerstersii	0.00150572	0	0	0	0	0	0	0	0	0	0	0	0	0	0	0	0	0	0	0	0	0	0	0	0	0	0	0	0	0	0	0	0	0	0	0	0	0	0	0	0	0
905	Bacteria	Proteobacteria	Gammaproteobacteria	Burkholderiales	Comamonadaceae	Delftia	unidentified	0	0	0	0	0	0	0	0	0	0	0	0	0	0	0	0	0	0	0	0	0	0	0	0	0	0	0	0	0	0	0	0	0	0	0	0	0	0	0	0	0	0
906	Bacteria	Proteobacteria	Gammaproteobacteria	Burkholderiales	Comamonadaceae	Variovorax	unidentified	0	0	0	0	4.1553e-05	0	0	0	0	0	0	0	0	0	0	0	0	0	0	0	0	0	2.92749e-05	0	4.2653e-05	0	0	0	0	0	0	0	0	0	0	0	0	0	0	0	0	0
907	Bacteria	Proteobacteria	Gammaproteobacteria	Burkholderiales	Neisseriaceae	Neisseria	unidentified	0	0	0.000120953	0	0	0	0	0	7.95381e-05	0.000129458	0	0	0	0	0	0	0	0	0	0	0	0	0	0	0	0	0	0	0	0	0	0	0	0	0	0	0	0	0	0	0.00012398	0
908	Bacteria	Proteobacteria	Gammaproteobacteria	Burkholderiales	Neisseriaceae	Neisseria	Neisseria_elongata	0	0	0	0	0	0	0	0	0	0	0	0	0	0	0	0	0	0	0	0	0	0	0	0	0	0	0	0	0	0	0	0	0	0	0	0	0	0	0	0	0	0
909	Bacteria	Proteobacteria	Gammaproteobacteria	Burkholderiales	Oxalobacteraceae	unidentified	unidentified	0	0	0	0	0	0	0	5.33115e-05	0	0	0	0	0	0	0	0	0	0	0	0	0	0	0	0	0	0	0.000470064	0	0	0	0	0	0	0	0	0	0	0	0	4.3957e-05	0	0
910	Bacteria	Proteobacteria	Gammaproteobacteria	Burkholderiales	Oxalobacteraceae	Oxalobacter	Oxalobacter_formigenes	0	0	0	0	0	0	0	0.000568656	0	0	0	0	0	0	0.00171199	0.00079818	0	0	0	6.3358e-05	0	0.000179123	0	0	0	0	0	0	0	0	0.00176495	0	0	0.00043258	0	0.000230696	0	5.99844e-05	0	0.0011209	0	0
911	Bacteria	Proteobacteria	Gammaproteobacteria	Burkholderiales	Sutterellaceae	Parasutterella	unidentified	0	0	0	0.00481994	0	0	0	0.00934729	0.00306885	0.000668867	0	0	0.00135297	0.000487211	0	0.00242115	0	0	0	0.00506864	0.000341282	0	0.00502064	0	0.000753537	0.000398295	0.000383015	0.00126166	0	0	0.000504271	0.0149588	0.000687789	0	0.000307627	0.000230696	0.00863768	0.000164957	0.0404816	0.00127475	0	0.00340049
912	Bacteria	Proteobacteria	Gammaproteobacteria	Burkholderiales	Sutterellaceae	Parasutterella	Burkholderiales_bacterium	0	0	0	0	0	0	0	0	0	0	0	0	0	0	0	0	0	0	0	0	0	0	0	0	0	0	0	0	0	0	0	0	0	0	0	0	0	0	0	0	0	0
913	Bacteria	Proteobacteria	Gammaproteobacteria	Burkholderiales	Sutterellaceae	Parasutterella	Parasutterella_excrementihominis	0	0	0	0	0	0	0	0	0	0	0	0	0	0	0	0	0	0	0	0	0	0	0	0	0	0	0	0	0	0	0	0	0	0	0	0	0	0	2.78703e-05	0	0	0
914	Bacteria	Proteobacteria	Gammaproteobacteria	Burkholderiales	Sutterellaceae	Parasutterella	Parasutterella_secunda	0	0	0	0	0	0	0	0	0	0	0	0	0	0	0	0.000957816	0	0	0	0	0	0	0	0	0	0	0	0	0	0	0	0	0	0	0	0	0	0	0	0.0058243	0	0
915	Bacteria	Proteobacteria	Gammaproteobacteria	Burkholderiales	Sutterellaceae	Parasutterella	gut_metagenome	0	0	0	0	0	0	0	0	0	0	0	0	0	0.00170524	0	0	0	0	0	0	0	0	0	0	0	0	0	0	0	0	0	0	0	0	0	0	0	0	0	0	0	0
916	Bacteria	Proteobacteria	Gammaproteobacteria	Burkholderiales	Sutterellaceae	Parasutterella	uncultured_bacterium	0	0	0	0	0.000263169	0	0	0	0	0	0	0	0	0	0	0.00316611	0.000294161	0	0	0.00147835	0	0	0	0	0	0	0.000365605	0	0	0	0.000283652	0.0358944	0.000122274	0.00309067	0	0	0	0.000299922	0	0	0	0
917	Bacteria	Proteobacteria	Gammaproteobacteria	Burkholderiales	Sutterellaceae	Parasutterella	uncultured_organism	0	0	0	0	0	0	0	0	0.00929934	0	0	0	2.21798e-05	0	0	0	0	0	0	0	0	0	0	0	0	0	0	0	0	0	0	0	0	0	0	0	0.011655	0	0	0	0	0
918	Bacteria	Proteobacteria	Gammaproteobacteria	Burkholderiales	Sutterellaceae	Sutterella	unidentified	0.00785415	0	0	0	0.000180063	0	0.0110274	0	0	0	0.0191727	0	2.21798e-05	0	0.00138761	0	0	0	0	0	0.00337016	0.000432881	0	0	0.00102367	0	0	0	0.000334788	0	0	0	0	0	0	0	0	0.0227791	0	0	0.00458727	0.00932998
919	Bacteria	Proteobacteria	Gammaproteobacteria	Burkholderiales	Sutterellaceae	Sutterella	Burkholderia_sp.	0	0	0	0	0	0	0	0	0	0	0	0	2.21798e-05	0	0	0	0	0	4.66422e-05	0	0	0	0	0	4.2653e-05	0	0	0	0	0	0	0	0	0	0	0	0	0	0	0	0	0
920	Bacteria	Proteobacteria	Gammaproteobacteria	Burkholderiales	Sutterellaceae	Sutterella	Sutterella_sp.	0	0	0	0	0	0	0	0	0	0	0	0	0	0	0	0	0	0	0	0	0	0	0	0	0	0	0	0	0	0	0	0	0	0	0	0	0	0	0	0	0	0
921	Bacteria	Proteobacteria	Gammaproteobacteria	Burkholderiales	Sutterellaceae	Sutterella	Sutterella_stercoricanis	0	0	0	0	0	0	0	0	0	0	0	0	0	0	0	0	0	0	0	0	0	0	0	0	0	0	0	0	0	0	0.000283652	0	0	0	0.000141982	0	0	0	0	0	0	0
922	Bacteria	Proteobacteria	Gammaproteobacteria	Burkholderiales	Sutterellaceae	Sutterella	Sutterella_wadsworthensis	0.00313352	0.0329535	0.0210055	0.0147545	0.00409989	0.047654	0	0	0	0.0209938	0	0	0.0047243	0	0.00019823	0.00521478	0	0	0.0204759	0.0245829	0.00260228	0.00144791	0.00651366	0	0.0124547	0.0113912	0	0.0128908	0.00751414	0	0.00318321	0	0.00163541	0	0.00224804	0.00560592	0.0380334	0	0	0.00782435	0.000644697	0
923	Bacteria	Proteobacteria	Gammaproteobacteria	Burkholderiales	Sutterellaceae	Sutterella	Sutterellaceae_bacterium	0	0	0	0	0	0	0.00583605	0	0	0	0	0	0	0	0.0252473	0	0.066799	0	0	0	0	0.00477662	0	0	0	0	0.00546667	0	0	0	0	0	0	0	0	0	0	0.000299922	0	0	0	0
924	Bacteria	Proteobacteria	Gammaproteobacteria	Burkholderiales	Sutterellaceae	Sutterella	gut_metagenome	0.0016278	0	0	0	0.000387828	0	0	0	0.0282559	0	0.00375299	0.0012288	0	0.00143456	0	0.0048689	0	0	0.00066232	0	0.00422337	0	0.0185164	0.00882333	0	0	0	0	0	0	0	0	0	0.0233593	0	0	0.0096774	0.00391398	0	0.00164839	0.00012398	0.00312708
925	Bacteria	Proteobacteria	Gammaproteobacteria	Burkholderiales	Sutterellaceae	Sutterella	metagenome	0	0	0	0	0	0	0	0	0	0	0	0	0	0	0	0	0	0	0	0	0	0	0	0	0	0	0	0	0	0	0	0	0	0	0	0	0	0	0	0.00129673	0	0
[truncated: 58 more rows]
[truncated: 58 more columns]
