# Supplementary material for: A qRT-PCR Method Capable of Quantifying Specific Microorganisms Compared to NGS-Based Metagenome Profiling Data
Source: Microorganisms. 2022 Jan 30;10(2):324. doi: 10.3390/microorganisms10020324 (PMC8875016; doi:10.3390/microorganisms10020324)
Supplement: Supplementary file 1 [file microorganisms-10-00324-s001.zip › Supplementary Table S6.xlsx]

## Sheet: Akkermansia
Supplementary Table S6. Measurement about bacterial proportion data exproted by qRT-PCR and NGS
Samples	Ct value	qPCR frequency	NGS frequency	qPCR proportion	NGS propotion
Candidate 1	25.7358	1.78954e-08	0.00223823	0.12884	0.349279
Candidate 2	31.0315	4.55617e-10	0	0.00328026	0
Candidate 3	28.4833	2.66476e-09	0.000335981	0.0191853	0.0524303
Candidate 4	33.1462	1.05199e-10	0	0.000757392	0
Candidate 5	24.9316	3.12496e-08	0.00103882	0.224985	0.16211
Candidate 6	33.9522	6.01688e-11	0	0.000433192	0
Candidate 7	24.8941	3.20722e-08	0.000814332	0.230908	0.127078
Candidate 8	34.0841	5.49111e-11	0	0.000395339	0
Candidate 9	32.57	1.56841e-10	0	0.00112919	0
Candidate 10	34.1222	5.34816e-11	0	0.000385047	0
Candidate 11	32.9628	1.19454e-10	0	0.00086002	0
Candidate 12	31.1596	4.16906e-10	0	0.00300156	0
Candidate 13	22.7325	1.43494e-07	0.00845052	1.0331	1.31872
Candidate 14	33.3955	8.85001e-11	0	0.000637166	0
Candidate 15	22.7502	1.41743e-07	0.0540989	1.0205	8.44221
Candidate 16	21.3876	3.64489e-07	0.0231206	2.62418	3.60801
Candidate 17	22.6832	1.48484e-07	0.00924156	1.06902	1.44216
Candidate 18	32.993	1.16981e-10	0	0.000842215	0
Candidate 19	20.0274	9.35759e-07	0.0506535	6.7371	7.90455
Candidate 20	34.2245	4.98192e-11	0	0.000358679	0
Candidate 21	29.6933	1.15194e-09	0	0.00829355	0
Candidate 22	35.329	2.31697e-11	0	0.000166813	0
Candidate 23	31.1085	4.31913e-10	0	0.00310961	0
Candidate 24	32.6727	1.46066e-10	0	0.00105162	0
Candidate 25	33.8375	6.51479e-11	0	0.00046904	0
Candidate 26	18.401	2.88909e-06	0.075769	20.8003	11.8239
Candidate 27	22.1552	2.14107e-07	0.00717283	1.54149	1.11933
Candidate 28	33.0275	1.1422e-10	0	0.000822342	0
Candidate 29	32.6789	1.4544e-10	0	0.00104711	0
Candidate 30	30.4518	6.80898e-10	0	0.0049022	0
Candidate 31	28.2103	3.22002e-09	0.000378203	0.0231829	0.0590191
Candidate 32	25.7505	1.77145e-08	0.0013356	0.127537	0.208423
Candidate 33	32.8855	1.26033e-10	0	0.000907386	0
Candidate 34	22.9455	1.23802e-07	0.0194376	0.891328	3.03327
Candidate 35	22.6311	1.5394e-07	0.012589	1.10831	1.96454
Candidate 36	31.8149	2.64705e-10	0	0.00190578	0
Candidate 37	35.8328	1.63403e-11	0	0.000117643	0
Candidate 38	21.725	2.88487e-07	0.0183252	2.07699	2.85968
Candidate 39	34.1747	5.1568e-11	0	0.00037127	0
Candidate 40	20.5539	6.49637e-07	0.0591442	4.67713	9.22953
Candidate 41	32.2172	2.00286e-10	0	0.00144198	0
Candidate 42	21.6512	3.03623e-07	0.00791169	2.18597	1.23463
Candidate 43	34.431	4.31743e-11	0	0.000310838	0
Candidate 44	22.1915	2.08778e-07	0.0122316	1.50312	1.90876
Candidate 45	30.4671	6.73754e-10	0	0.00485077	0
Candidate 46	33.208	1.00782e-10	0	0.00072559	0
Candidate 47	27.2542	6.24676e-09	0.000537842	0.0449743	0.0839311
Candidate 48	32.9301	1.22196e-10	0	0.000879766	0
Candidate 49	27.7922	4.30255e-09	0	0.0309767	0
Candidate 50	32.9614	1.1957e-10	0	0.000860855	0
Candidate 51	23.2991	9.68917e-08	0.00505837	0.697583	0.789367
Candidate 52	32.462	1.69025e-10	0	0.00121691	0
Candidate 53	32.9837	1.17742e-10	0	0.000847698	0
Candidate 54	23.458	8.6786e-08	0.00294563	0.624826	0.459671
Candidate 55	33.2055	1.0096e-10	0	0.000726874	0
Candidate 56	33.4798	8.34789e-11	0	0.000601016	0
Candidate 57	23.9686	6.09172e-08	0.00463223	0.43858	0.722866
Candidate 58	23.0714	1.1345e-07	0.020459	0.816793	3.19266
Candidate 59	28.6514	2.37169e-09	0	0.0170752	0
Candidate 60	32.242	1.96871e-10	0	0.00141739	0
Candidate 61	23.2387	1.01031e-07	0.0129068	0.727385	2.01412
Candidate 62	33.9661	5.95935e-11	0	0.00042905	0
Candidate 63	22.013	2.3628e-07	0.0306617	1.70112	4.78481
Candidate 64	24.9786	3.02473e-08	0.00279765	0.217768	0.436577
Candidate 65	26.4752	1.07195e-08	0.000580452	0.077176	0.0905803
Candidate 66	22.5486	1.63007e-07	0.0198253	1.17358	3.09377
Candidate 67	19.2355	1.62009e-06	0.0388402	11.664	6.06107
Candidate 68	23.8321	6.69591e-08	0.00307704	0.48208	0.480177
Candidate 69	20.9643	4.88798e-07	0.0331452	3.51916	5.17236
Candidate 70	30.1215	8.56098e-10	0.000153952	0.00616357	0.0240244
Candidate 71	23.1096	1.10488e-07	0.0066329	0.795468	1.03507
Candidate 72	34.0823	5.49806e-11	0	0.000395839	0
Candidate 73	20.4094	7.18071e-07	0.0157486	5.16983	2.4576
Candidate 74	32.3916	1.77481e-10	0	0.0012778	0
Candidate 75	32.6505	1.48332e-10	0	0.00106793	0
Candidate 76	24.894	3.20738e-08	0.00418538	0.230919	0.653135
Candidate 77	34.003	5.80885e-11	0	0.000418215	0
Candidate 78	32.6606	1.47297e-10	0	0.00106048	0
Candidate 79	33.9676	5.95301e-11	0	0.000428593	0
Candidate 80	34.1471	5.25652e-11	0	0.000378449	0
Candidate 81	31.0613	4.46287e-10	0.000100911	0.00321309	0.0157473
Candidate 82	32.5355	1.60638e-10	0	0.00115653	0
Candidate 83	32.5566	1.58307e-10	0	0.00113975	0
Candidate 84	30.5669	6.28685e-10	0	0.00452629	0
Candidate 85	32.2895	1.90497e-10	0	0.0013715	0
Candidate 86	19.6877	1.18419e-06	0.00946662	8.52573	1.47728
Candidate 87	33.038	1.13389e-10	0	0.00081636	0
Candidate 88	32.0206	2.29536e-10	0	0.00165257	0
Candidate 89	22.2313	2.03104e-07	0.00857106	1.46227	1.33753
Candidate 90	27.761	4.39646e-09	0	0.0316528	0
Candidate 91	33.9342	6.09231e-11	0	0.000438623	0
Candidate 92	26.7555	8.82674e-09	0.000392526	0.0635491	0.0612543
Candidate 93	27.8971	4.0008e-09	0.00128318	0.0288042	0.200242
Candidate 94	34.7055	3.56955e-11	0	0.000256994	0
Candidate 95	28.1444	3.37053e-09	0.000575146	0.0242665	0.0897525
Candidate 96	25.9378	1.55574e-08	0.00423974	0.112007	0.661617
Candidate 97	27.2249	6.37513e-09	0.000634276	0.0458985	0.0989798
Candidate 98	33.9609	5.98087e-11	0	0.000430599	0
Candidate 99	33.9151	6.1737e-11	0	0.000444482	0
Candidate 100	19.0595	1.83026e-06	0.049075	13.1772	7.65822
Sum		1.38896e-05	0.640814	100	100
*ABS: Absolute value

## Sheet: Bacteroides
Supplementary Table S6. Measurement about bacterial proportion data exproted by qRT-PCR and NGS
Samples	Ct value	qPCR frequency	NGS frequency	qPCR proportion	NGS propotion
Candidate 1	19.5325	1.31864e-06	0.126399	0.851191	0.506802
Candidate 2	17.3854	5.84092e-06	0.430379	3.77035	1.72562
Candidate 3	19.0709	1.81588e-06	0.184373	1.17216	0.739251
Candidate 4	19.2788	1.57224e-06	0.265097	1.01489	1.06292
Candidate 5	20.8567	5.26627e-07	0.2121	0.33994	0.850425
Candidate 6	19.1145	1.7618e-06	0.48013	1.13725	1.9251
Candidate 7	20.2692	7.91332e-07	0.173555	0.510809	0.695874
Candidate 8	20.8919	5.13951e-07	0.347076	0.331758	1.39161
Candidate 9	19.7688	1.11944e-06	0.306474	0.722606	1.22882
Candidate 10	18.4483	2.79587e-06	0.286232	1.80475	1.14766
Candidate 11	18.1437	3.45311e-06	0.247823	2.229	0.993656
Candidate 12	20.9796	4.8364e-07	0.07594	0.312192	0.304485
Candidate 13	19.9081	1.01641e-06	0.232999	0.656097	0.93422
Candidate 14	20.0601	9.14758e-07	0.170754	0.590481	0.684644
Candidate 15	19.0844	1.79891e-06	0.302031	1.16121	1.21101
Candidate 16	22.7377	1.42978e-07	0.279855	0.0922929	1.12209
Candidate 17	21.5992	3.14762e-07	0.102172	0.20318	0.409662
Candidate 18	16.6565	9.68013e-06	0.530674	6.24857	2.12776
Candidate 19	18.7202	2.31561e-06	0.425573	1.49474	1.70635
Candidate 20	19.9907	9.59875e-07	0.291341	0.619604	1.16814
Candidate 21	21.3596	3.71641e-07	0.10968	0.239896	0.439765
Candidate 22	23.4588	8.6733e-08	0.066813	0.0559866	0.267889
Candidate 23	22.0275	2.33918e-07	0.0512456	0.150995	0.205472
Candidate 24	19.755	1.1302e-06	0.102916	0.72955	0.412648
Candidate 25	19.0808	1.8034e-06	0.209	1.16411	0.837993
Candidate 26	19.4872	1.36071e-06	0.308307	0.878344	1.23617
Candidate 27	20.0047	9.50554e-07	0.349188	0.613587	1.40008
Candidate 28	20.0786	9.03127e-07	0.0902359	0.582973	0.361804
Candidate 29	21.448	3.49555e-07	0.553777	0.22564	2.22039
Candidate 30	18.155	3.42612e-06	0.252915	2.21158	1.01407
Candidate 31	21.8173	2.706e-07	0.158499	0.174674	0.635506
Candidate 32	19.621	1.24019e-06	0.274467	0.800548	1.10049
Candidate 33	19.9352	9.97503e-07	0.357406	0.643893	1.43303
Candidate 34	19.7998	1.09566e-06	0.308384	0.707253	1.23648
Candidate 35	19.6642	1.20365e-06	0.145862	0.776959	0.584841
Candidate 36	19.0707	1.81619e-06	0.235518	1.17236	0.944319
Candidate 37	22.4994	1.68658e-07	0.145016	0.10887	0.581446
Candidate 38	20.9521	4.92946e-07	0.163892	0.318199	0.657133
Candidate 39	15.8654	1.67511e-05	0.372417	10.8129	1.49322
Candidate 40	21.1803	4.20814e-07	0.199653	0.271638	0.800516
Candidate 41	23.5873	7.93439e-08	0.0134891	0.0512169	0.0540849
Candidate 42	21.0268	4.68059e-07	0.274824	0.302135	1.10192
Candidate 43	21.868	2.61268e-07	0.560103	0.16865	2.24576
Candidate 44	19.825	1.07667e-06	0.225773	0.694997	0.905248
Candidate 45	20.8604	5.25285e-07	0.282048	0.339074	1.13088
Candidate 46	19.0481	1.84486e-06	0.347211	1.19086	1.39216
Candidate 47	17.7566	4.51577e-06	0.39402	2.91495	1.57984
Candidate 48	22.8036	1.36596e-07	0.226212	0.0881734	0.907007
Candidate 49	19.5063	1.34279e-06	0.286091	0.866777	1.14709
Candidate 50	17.8262	4.3031e-06	0.508287	2.77768	2.038
Candidate 51	19.0847	1.79856e-06	0.273875	1.16098	1.09811
Candidate 52	17.9108	4.05806e-06	0.284154	2.6195	1.13933
Candidate 53	17.6694	4.79714e-06	0.403702	3.09658	1.61866
Candidate 54	18.7644	2.24573e-06	0.409786	1.44963	1.64306
Candidate 55	19.8326	1.07104e-06	0.428081	0.691361	1.71641
Candidate 56	20.8382	5.33436e-07	0.334727	0.344336	1.3421
Candidate 57	21.7382	2.85865e-07	0.079941	0.184527	0.320527
Candidate 58	20.1681	8.4876e-07	0.349961	0.547879	1.40318
Candidate 59	23.4896	8.49024e-08	0.0407538	0.0548049	0.163404
Candidate 60	20.2147	8.21826e-07	0.143064	0.530493	0.573623
Candidate 61	18.6823	2.37728e-06	0.352855	1.53455	1.41479
Candidate 62	18.5833	2.54606e-06	0.550897	1.6435	2.20884
Candidate 63	19.9425	9.92453e-07	0.218614	0.640634	0.876543
Candidate 64	23.7907	6.89129e-08	0.0116786	0.0444836	0.0468258
Candidate 65	21.8499	2.64563e-07	0.122228	0.170776	0.490078
Candidate 66	19.9308	1.00055e-06	0.333589	0.645862	1.33754
Candidate 67	20.923	5.02995e-07	0.111118	0.324686	0.445531
Candidate 68	23.4445	8.76014e-08	0.0567695	0.0565471	0.22762
Candidate 69	20.1055	8.86431e-07	0.298146	0.572196	1.19543
Candidate 70	20.9368	4.98184e-07	0.180216	0.32158	0.722582
Candidate 71	19.9823	9.65471e-07	0.361549	0.623216	1.44964
Candidate 72	21.3662	3.69948e-07	0.131563	0.238804	0.527505
Candidate 73	21.5662	3.22049e-07	0.231772	0.207884	0.929299
Candidate 74	19.9332	9.98884e-07	0.196639	0.644785	0.788434
Candidate 75	23.6712	7.4862e-08	0.109342	0.0483238	0.438411
Candidate 76	18.7547	2.26089e-06	0.401123	1.45942	1.60832
Candidate 77	23.0071	1.18623e-07	0.0812779	0.0765717	0.325887
Candidate 78	16.9352	7.98004e-06	0.384366	5.15115	1.54113
Candidate 79	17.9298	4.00494e-06	0.305123	2.58521	1.2234
Candidate 80	21.4212	3.56107e-07	0.0932484	0.229869	0.373883
Candidate 81	21.885	2.5821e-07	0.251713	0.166676	1.00925
Candidate 82	24.0414	5.79167e-08	0.0111703	0.0373855	0.0447879
Candidate 83	22.1838	2.09906e-07	0.0409472	0.135495	0.16418
Candidate 84	20.5499	6.51424e-07	0.258644	0.420497	1.03704
Candidate 85	21.7888	2.75998e-07	0.548731	0.178158	2.20016
Candidate 86	18.8141	2.16963e-06	0.122831	1.40051	0.492494
Candidate 87	19.4004	1.44505e-06	0.113205	0.932788	0.4539
Candidate 88	18.4821	2.73107e-06	0.181941	1.76292	0.729498
Candidate 89	19.1907	1.67124e-06	0.36206	1.07879	1.45169
Candidate 90	19.9529	9.85357e-07	0.369986	0.636053	1.48347
Candidate 91	21.3822	3.65873e-07	0.163195	0.236173	0.654338
Candidate 92	20.1888	8.36689e-07	0.106479	0.540087	0.426933
Candidate 93	21.4687	3.44559e-07	0.149337	0.222415	0.598772
Candidate 94	18.9055	2.03654e-06	0.515781	1.31459	2.06804
Candidate 95	24.5404	4.09836e-08	0.037061	0.0264551	0.148598
Candidate 96	20.6514	6.07189e-07	0.255457	0.391943	1.02427
Candidate 97	21.2098	4.12302e-07	0.260244	0.266143	1.04346
Candidate 98	17.0207	7.52084e-06	0.570167	4.85474	2.28611
Candidate 99	23.9238	6.28385e-08	0.0869324	0.0405626	0.348559
Candidate 100	21.9446	2.47746e-07	0.210245	0.159921	0.842984
Sum		0.000154917	24.9405	100	100

## Sheet: Bifidobacterium
Supplementary Table S6. Measurement about bacterial proportion data exproted by qRT-PCR and NGS
Samples	Ct value	qPCR frequency	NGS frequency	qPCR proportion	NGS propotion
Candidate 1	23.3472	9.37124e-08	0.00484271	0.408467	0.450351
Candidate 2	23.6094	7.81388e-08	0.0183134	0.340586	1.70307
Candidate 3	24.2148	5.136e-08	0.00158583	0.223864	0.147475
Candidate 4	24.724	3.6086e-08	0.00156806	0.157289	0.145822
Candidate 5	23.3442	9.39056e-08	0.00596978	0.409309	0.555163
Candidate 6	20.2269	8.14861e-07	0.054918	3.55176	5.10713
Candidate 7	23.9502	6.16979e-08	0.00144205	0.268925	0.134104
Candidate 8	21.0234	4.69151e-07	0.0163133	2.0449	1.51707
Candidate 9	22.2146	2.05471e-07	0.0206534	0.895593	1.92068
Candidate 10	23.9149	6.32281e-08	0.00379744	0.275594	0.353145
Candidate 11	23.993	5.98934e-08	0.0124507	0.261059	1.15786
Candidate 12	25.6377	1.91554e-08	0.000327681	0.0834931	0.0304729
Candidate 13	17.9066	4.06984e-06	0.138136	17.7393	12.846
Candidate 14	24.092	5.5923e-08	0.00429016	0.243753	0.398966
Candidate 15	26.6632	9.40958e-09	0.000756879	0.0410138	0.0703865
Candidate 16	23.3359	9.44462e-08	0.0107222	0.411666	0.997119
Candidate 17	25.0295	2.91994e-08	0.00208364	0.127272	0.193769
Candidate 18	26.6644	9.4019e-09	0.00119043	0.0409804	0.110705
Candidate 19	23.8779	6.48691e-08	0.00243472	0.282747	0.226419
Candidate 20	27.7267	4.50234e-09	0.000401267	0.0196245	0.0373161
Candidate 21	27.0014	7.44334e-09	0	0.0324435	0
Candidate 22	25.1568	2.6733e-08	0	0.116522	0
Candidate 23	25.5791	1.99497e-08	0.0043034	0.0869555	0.400198
Candidate 24	24.1276	5.45607e-08	0.00208796	0.237816	0.194171
Candidate 25	21.7214	2.89214e-07	0.0149001	1.26061	1.38565
Candidate 26	21.303	3.86518e-07	0.0502383	1.68473	4.67194
Candidate 27	21.8598	2.62748e-07	0.0107592	1.14525	1.00056
Candidate 28	26.9849	7.52889e-09	0	0.0328164	0
Candidate 29	23.3381	9.43058e-08	0.00889049	0.411054	0.826776
Candidate 30	23.8657	6.54207e-08	0.000741774	0.285151	0.0689817
Candidate 31	25.3059	2.41078e-08	0.000661855	0.105079	0.0615496
Candidate 32	22.1554	2.14067e-07	0.0139905	0.933061	1.30105
Candidate 33	24.1385	5.41501e-08	0.00521192	0.236026	0.484685
Candidate 34	22.0338	2.32897e-07	0.0124367	1.01514	1.15656
Candidate 35	25.6957	1.84006e-08	0.00224804	0.0802031	0.209058
Candidate 36	22.6328	1.53763e-07	0.0102199	0.670212	0.950401
Candidate 37	25.4131	2.23824e-08	0.00320641	0.0975586	0.298182
Candidate 38	21.594	3.1591e-07	0.0165407	1.37696	1.53821
Candidate 39	26.3199	1.19374e-08	0.00319115	0.0520321	0.296763
Candidate 40	23.9722	6.0766e-08	0.00567045	0.264863	0.527327
Candidate 41	25.8858	1.61288e-08	0	0.0703009	0
Candidate 42	21.6144	3.11477e-07	0.00808257	1.35764	0.751643
Candidate 43	20.9098	5.07595e-07	0.0226803	2.21247	2.10917
Candidate 44	19.5235	1.32694e-06	0.0432201	5.78375	4.01928
Candidate 45	23.2535	1.00001e-07	0.00842517	0.435876	0.783504
Candidate 46	23.0756	1.1312e-07	0.0104841	0.493061	0.974978
Candidate 47	21.6467	3.04574e-07	0.0204044	1.32756	1.89752
Candidate 48	27.8731	4.0679e-09	0.000572887	0.0177309	0.053276
Candidate 49	21.4988	3.37451e-07	0.0151554	1.47086	1.40939
Candidate 50	29.1376	1.69319e-09	0.0193893	0.00738015	1.80312
Candidate 51	20.7015	5.86443e-07	0.0274597	2.55615	2.55364
Candidate 52	20.5787	6.38527e-07	0.0111138	2.78317	1.03354
Candidate 53	21.6339	3.07279e-07	0.0135776	1.33935	1.26266
Candidate 54	20.4517	6.97322e-07	0.0151	3.03944	1.40423
Candidate 55	27.5099	5.23216e-09	0.000591964	0.0228056	0.05505
Candidate 56	18.8433	2.12616e-06	0.0453781	9.26737	4.21996
Candidate 57	26.5424	1.02314e-08	0.000263195	0.044596	0.024476
Candidate 58	20.8929	5.13583e-07	0.0438512	2.23857	4.07797
Candidate 59	25.0119	2.95567e-08	0.00135127	0.128829	0.125662
Candidate 60	25.9644	1.52735e-08	0.000441557	0.0665731	0.0410628
Candidate 61	25.4204	2.22683e-08	0.000336332	0.0970616	0.0312774
Candidate 62	21.4787	3.42188e-07	0.0265696	1.49151	2.47085
Candidate 63	21.8358	2.67156e-07	0.0129959	1.16446	1.20857
Candidate 64	22.7606	1.40729e-07	0.00515021	0.613399	0.478947
Candidate 65	26.1215	1.36971e-08	0.00023648	0.0597022	0.0219916
Candidate 66	20.7223	5.78054e-07	0.0342133	2.51958	3.18169
Candidate 67	20.3808	7.32434e-07	0.0232121	3.19248	2.15862
Candidate 68	24.235	5.06456e-08	0.00264859	0.220751	0.246308
Candidate 69	23.2083	1.03184e-07	0.00600023	0.449753	0.557995
Candidate 70	22.7385	1.42903e-07	0.00124701	0.622875	0.115966
Candidate 71	24.3656	4.62618e-08	0.00331645	0.201643	0.308415
Candidate 72	25.996	1.49422e-08	0.000445673	0.065129	0.0414456
Candidate 73	21.9702	2.43396e-07	0.00535238	1.0609	0.497748
Candidate 74	22.12	2.19394e-07	0.00496189	0.956281	0.461433
Candidate 75	22.6094	1.56274e-07	0.0169947	0.681155	1.58043
Candidate 76	22.4105	1.79378e-07	0.00777869	0.781858	0.723383
Candidate 77	28.8045	2.13301e-09	0	0.0092972	0
Candidate 78	20.6871	5.92313e-07	0.040511	2.58173	3.76734
Candidate 79	26.9754	7.57885e-09	0	0.0330342	0
Candidate 80	27.5546	5.07284e-09	0.000494301	0.0221112	0.0459678
Candidate 81	26.1629	1.33097e-08	0.00182649	0.0580133	0.169856
Candidate 82	26.0031	1.48697e-08	0.00219559	0.0648128	0.20418
Candidate 83	28.6579	2.36102e-09	0	0.010291	0
Candidate 84	24.8971	3.20045e-08	0.00188006	0.139499	0.174837
Candidate 85	26.424	1.11064e-08	0.00104175	0.0484098	0.0968779
Candidate 86	20.9716	4.86301e-07	0.00866596	2.11965	0.805896
Candidate 87	25.2748	2.46334e-08	0.000296634	0.10737	0.0275857
Candidate 88	25.9568	1.53538e-08	0.000673087	0.066923	0.0625941
Candidate 89	23.9747	6.06572e-08	0.00174833	0.264389	0.162587
Candidate 90	23.5477	8.15533e-08	0.00106465	0.355469	0.0990073
Candidate 91	22.407	1.79815e-07	0.00467153	0.783766	0.434432
Candidate 92	25.4448	2.18949e-08	0.00125608	0.0954339	0.11681
Candidate 93	25.3781	2.29321e-08	0.0011716	0.0999549	0.108953
Candidate 94	26.2469	1.25573e-08	0	0.054734	0
Candidate 95	23.9593	6.13109e-08	0.000575146	0.267238	0.0534861
Candidate 96	23.5299	8.25675e-08	0.00413658	0.35989	0.384684
Candidate 97	25.5415	2.04755e-08	0.0011417	0.0892471	0.106173
Candidate 98	22.9168	1.26288e-07	0.00454914	0.550453	0.42305
Candidate 99	24.608	3.91061e-08	0.0020439	0.170453	0.190074
Candidate 100	19.7763	1.11366e-06	0.0688774	4.85413	6.4053
Sum		2.29425e-05	1.07532	100	100

## Sheet: Phasclorctobacterium
Supplementary Table S6. Measurement about bacterial proportion data exproted by qRT-PCR and NGS
Samples	Ct value	qPCR frequency	NGS frequency	qPCR proportion	NGS propotion
Candidate 1	0	0	0	0	0
Candidate 2	25.0653	2.84835e-08	0.0637351	2.51453	4.40468
Candidate 3	25.4617	2.16403e-08	0.0230886	1.91042	1.59563
Candidate 4	24.6817	3.71592e-08	0.0391488	3.28044	2.70554
Candidate 5	35.2817	2.39409e-11	0.00454313	0.00211351	0.313971
Candidate 6	23.3581	9.30034e-08	0.0972866	8.21039	6.72339
Candidate 7	0	0	0.00466545	0	0.322425
Candidate 8	25.142	2.70091e-08	0.0170242	2.38438	1.17652
Candidate 9	31.4796	3.33959e-10	0.000861663	0.029482	0.0595488
Candidate 10	0	0	0	0	0
Candidate 11	29.2061	1.61472e-09	0.00228943	0.142548	0.15822
Candidate 12	0	0	0	0	0
Candidate 13	0	0	0	0	0
Candidate 14	38.7689	2.13503e-12	0	0.000188482	0
Candidate 15	26.1918	1.30464e-08	0.0331766	1.15174	2.2928
Candidate 16	0	0	0	0	0
Candidate 17	30.8477	5.17494e-10	0.000661862	0.0456846	0.0457407
Candidate 18	0	0	0	0	0
Candidate 19	24.2635	4.96545e-08	0.024879	4.38352	1.71936
Candidate 20	31.0609	4.46427e-10	0.0115523	0.0394108	0.798367
Candidate 21	32.8071	1.33066e-10	0.000255962	0.0117471	0.0176893
Candidate 22	0	0	0.0134044	0	0.926365
Candidate 23	0	0	7.31872e-05	0	0.0050579
Candidate 24	0	0	0.125817	0	8.69508
Candidate 25	0	0	0	0	0
Candidate 26	0	0	0	0	0
Candidate 27	26.2775	1.22938e-08	0.00915754	1.08531	0.63287
Candidate 28	0	0	0.0746023	0	5.1557
Candidate 29	24.5408	4.09727e-08	0.056046	3.61709	3.87329
Candidate 30	25.1912	2.61023e-08	0.013708	2.30432	0.947346
Candidate 31	36.7159	8.85971e-12	0.0121025	0.000782139	0.836393
Candidate 32	22.7502	1.41743e-07	0.0840429	12.5132	5.80813
Candidate 33	24.8266	3.36089e-08	0.0239656	2.96701	1.65624
Candidate 34	25.1626	2.66258e-08	0.0280494	2.35054	1.93847
Candidate 35	30.1597	8.33703e-10	0.00106486	0.0735997	0.0735917
Candidate 36	31.5542	3.17135e-10	0.000138418	0.0279968	0.00956594
Candidate 37	0	0	0	0	0
Candidate 38	0	0	0.000314918	0	0.0217637
Candidate 39	0	0	0	0	0
Candidate 40	33.3678	9.0217e-11	0.0261544	0.0079644	1.80751
Candidate 41	33.2264	9.95044e-11	0.000272757	0.0087843	0.01885
Candidate 42	29.9825	9.427e-10	0.000427197	0.083222	0.0295232
Candidate 43	0	0	0	0	0
Candidate 44	24.9908	2.99936e-08	0.0139205	2.64784	0.962035
Candidate 45	30.4764	6.69411e-10	0.000548252	0.0590959	0.0378892
Candidate 46	25.6129	1.94865e-08	0.0131052	1.72028	0.905687
Candidate 47	30.2677	7.73612e-10	0.0379851	0.0682948	2.62512
Candidate 48	39.9399	9.48203e-13	0.00979116	8.37078e-05	0.676658
Candidate 49	0	0	0	0	0
Candidate 50	24.3034	4.82995e-08	0.0617709	4.26391	4.26893
Candidate 51	30.1567	8.35478e-10	0.000858117	0.0737564	0.0593037
Candidate 52	24.5879	3.96561e-08	0.0223247	3.50086	1.54284
Candidate 53	0	0	0	0	0
Candidate 54	25.4569	2.1712e-08	0.0088083	1.91675	0.608734
Candidate 55	26.2369	1.26443e-08	0.0105461	1.11624	0.728829
Candidate 56	0	0	0.0261426	0	1.80669
Candidate 57	0	0	0	0	0
Candidate 58	0	0	0	0	0
Candidate 59	36.2306	1.24025e-11	0.0186878	0.00109489	1.2915
Candidate 60	0	0	0	0	0
Candidate 61	0	0	0	0	0
Candidate 62	0	0	0.0469669	0	3.24584
Candidate 63	0	0	0.000108601	0	0.00750533
Candidate 64	0	0	0.0134478	0	0.929364
Candidate 65	33.6013	7.67355e-11	0.0115875	0.00677425	0.800804
Candidate 66	24.8227	3.36994e-08	0.0155831	2.975	1.07694
Candidate 67	0	0	0	0	0
Candidate 68	35.9674	1.4885e-11	0.0154242	0.00131405	1.06595
Candidate 69	25.6452	1.90556e-08	0.015824	1.68223	1.09358
Candidate 70	32.1615	2.08177e-10	0.000100069	0.018378	0.00691565
Candidate 71	25.2798	2.45485e-08	0.0244224	2.16715	1.68781
Candidate 72	24.4329	4.41541e-08	0.0297964	3.89795	2.0592
Candidate 73	28.2565	3.11843e-09	0.00183554	0.275296	0.126853
Candidate 74	0	0	0.0135958	0	0.939594
Candidate 75	29.6624	1.17685e-09	0.000749006	0.103892	0.0517631
Candidate 76	0	0	0	0	0
Candidate 77	0	0	0	0	0
Candidate 78	26.4109	1.12079e-08	0.00589273	0.989435	0.407241
Candidate 79	31.9485	2.41294e-10	0.00851758	0.0213015	0.588642
Candidate 80	0	0	0	0	0
Candidate 81	38.2873	2.98108e-12	0	0.000263171	0
Candidate 82	0	0	0.00165235	0	0.114192
Candidate 83	30.0372	9.07606e-10	0.0021707	0.0801239	0.150015
Candidate 84	32.1076	2.16103e-10	0.000341034	0.0190777	0.0235686
Candidate 85	0	0	0	0	0
Candidate 86	24.2999	4.84172e-08	7.06464e-05	4.2743	0.00488231
Candidate 87	0	0	0	0	0
Candidate 88	0	0	0	0	0
Candidate 89	27.3081	6.01781e-09	0.00541555	0.531255	0.374264
Candidate 90	24.8159	3.3859e-08	0.0258496	2.98909	1.78644
Candidate 91	39.6465	1.16201e-12	0.0010484	0.000102582	0.0724537
Candidate 92	27.5535	5.07647e-09	0.00510284	0.448154	0.352653
Candidate 93	24.3205	4.77305e-08	0.0309357	4.21367	2.13794
Candidate 94	24.364	4.63125e-08	0.0545614	4.08849	3.77069
Candidate 95	0	0	0.0125813	0	0.869485
Candidate 96	0	0	0.0135032	0	0.933194
Candidate 97	31.2724	3.85533e-10	0.0057402	0.034035	0.3967
Candidate 98	24.4589	4.33644e-08	0.0258195	3.82823	1.78436
Candidate 99	24.8901	3.21611e-08	0.0413445	2.8392	2.85728
Candidate 100	36.79	8.4161e-12	0	0.000742977	0
Sum		1.13275e-06	1.44699	100	100

## Sheet: Roseburia
Supplementary Table S6. Measurement about bacterial proportion data exproted by qRT-PCR and NGS
Samples	Ct value	qPCR frequency	NGS frequency	qPCR proportion	NGS propotion
Candidate 1	21.508	3.35317e-07	0.00687747	0.170876	0.726297
Candidate 2	29.2814	1.53253e-09	0.00410243	0.000780971	0.433238
Candidate 3	19.2037	1.65617e-06	0.0189762	0.843975	2.00399
Candidate 4	17.5303	5.28284e-06	0.0408011	2.69211	4.30881
Candidate 5	18.2736	3.15578e-06	0.019516	1.60817	2.061
Candidate 6	29.1594	1.66775e-09	0	0.00084988	0
Candidate 7	18.2673	3.16955e-06	0.0135722	1.61519	1.4333
Candidate 8	18.6891	2.36598e-06	0.0038562	1.20569	0.407235
Candidate 9	26.2777	1.22922e-08	0.0191422	0.00626406	2.02151
Candidate 10	20.7322	5.74091e-07	0.0310484	0.292554	3.27887
Candidate 11	23.408	8.9843e-08	0.00392026	0.0457836	0.414
Candidate 12	18.9706	1.94666e-06	0.00516097	0.99201	0.545026
Candidate 13	26.386	1.1403e-08	0.00153041	0.00581092	0.161619
Candidate 14	23.945	6.19218e-08	0.0113953	0.0315551	1.20341
Candidate 15	20.7876	5.52479e-07	0.00711827	0.281541	0.751727
Candidate 16	17.4487	5.59017e-06	0.0111213	2.84872	1.17447
Candidate 17	30.5827	6.21844e-10	0.00139726	0.000316889	0.147558
Candidate 18	37.2876	5.961e-12	0	3.0377e-06	0
Candidate 19	16.3831	1.17e-05	0.0141326	5.96227	1.49248
Candidate 20	18.5894	2.53528e-06	0.0231257	1.29196	2.44219
Candidate 21	19.9181	1.00941e-06	0.00511924	0.514389	0.540618
Candidate 22	18.0321	3.73077e-06	0.00832923	1.90118	0.87961
Candidate 23	20.3459	7.5035e-07	0.00190287	0.382375	0.200953
Candidate 24	29.4209	1.39131e-09	0.00942951	0.000709005	0.995806
Candidate 25	19.5887	1.26825e-06	0.00636952	0.646296	0.672655
Candidate 26	31.8058	2.66384e-10	0.00620013	0.000135748	0.654766
Candidate 27	21.1221	4.38132e-07	0.00571041	0.22327	0.603049
Candidate 28	22.4742	1.71635e-07	0.00987383	0.0874643	1.04273
Candidate 29	28.6767	2.3305e-09	0.00238072	0.00118761	0.251416
Candidate 30	17.7045	4.68194e-06	0.022906	2.3859	2.41899
Candidate 31	27.9178	3.94358e-09	0.00138674	0.00200963	0.146447
Candidate 32	20.6085	6.25509e-07	0.00410698	0.318756	0.433719
Candidate 33	18.4809	2.73331e-06	0.00544118	1.39288	0.574617
Candidate 34	25.9163	1.57909e-08	0.0103592	0.00804697	1.09398
Candidate 35	24.8851	3.22726e-08	0.00790364	0.016446	0.834666
Candidate 36	20.8179	5.40987e-07	0.00703624	0.275685	0.743064
Candidate 37	27.7163	4.53489e-09	0.000618016	0.00231096	0.0652657
Candidate 38	29.3636	1.44773e-09	0.0022944	0.000737755	0.242301
Candidate 39	16.3782	1.17399e-05	0.0150082	5.9826	1.58494
Candidate 40	26.8103	8.49775e-09	0.0101321	0.00433041	1.07
Candidate 41	30.5639	6.30019e-10	0.000223164	0.000321055	0.0235673
Candidate 42	0	0	0.00579279	0	0.611749
Candidate 43	31.0781	4.41126e-10	0.0114878	0.000224796	1.21317
Candidate 44	27.8924	4.01387e-09	0.0045037	0.00204545	0.475614
Candidate 45	16.6339	9.83293e-06	0.0188196	5.01082	1.98745
Candidate 46	26.6733	9.34419e-09	0.0156002	0.00476176	1.64746
Candidate 47	0	0	0	0	0
Candidate 48	29.1765	1.64821e-09	0.00210927	0.000839919	0.222749
Candidate 49	19.7141	1.16271e-06	0.00450008	0.59251	0.475232
Candidate 50	32.7007	1.43253e-10	0.00220691	7.3001e-05	0.233061
Candidate 51	17.7113	4.65982e-06	0.00688752	2.37462	0.727358
Candidate 52	17.1736	6.7642e-06	0.021985	3.44701	2.32173
Candidate 53	18.4814	2.73236e-06	0.00853373	1.3924	0.901206
Candidate 54	0	0	0.0163583	0	1.72752
Candidate 55	26.8757	8.121e-09	0.0128593	0.00413842	1.35801
Candidate 56	31.2236	3.98811e-10	0.000408223	0.000203232	0.0431105
Candidate 57	21.1532	4.28805e-07	0.00187746	0.218517	0.198269
Candidate 58	18.3934	2.90431e-06	0.0125724	1.48002	1.32771
Candidate 59	16.2001	1.32827e-05	0.00833765	6.76878	0.880499
Candidate 60	15.7877	1.76775e-05	0.0286802	9.00838	3.02878
Candidate 61	20.3846	7.30529e-07	0.0186244	0.372274	1.96683
Candidate 62	27.8192	4.22252e-09	0	0.00215178	0
Candidate 63	27.4965	5.28123e-09	0.00597307	0.00269129	0.630787
Candidate 64	25.7685	1.74953e-08	0.0011127	0.00891555	0.117507
Candidate 65	29.7063	1.14157e-09	0.00907224	0.000581741	0.958077
Candidate 66	21.8855	2.58117e-07	0.00901629	0.131535	0.952167
Candidate 67	21.6428	3.05399e-07	0.00504262	0.15563	0.532527
Candidate 68	26.8609	8.20499e-09	0.00788736	0.00418123	0.832946
Candidate 69	20.1082	8.84745e-07	0.00306346	0.450862	0.323517
Candidate 70	18.5314	2.6393e-06	0.0100607	1.34497	1.06247
Candidate 71	0	0	0.00151252	0	0.15973
Candidate 72	16.8921	8.22174e-06	0.0078693	4.18976	0.83104
Candidate 73	20.711	5.82611e-07	0.00856072	0.296896	0.904057
Candidate 74	16.5443	1.04634e-05	0.0132937	5.33212	1.40388
Candidate 75	20.3902	7.27667e-07	0.00183377	0.370816	0.193656
Candidate 76	25.4897	2.12246e-08	0.00487954	0.0108159	0.515305
Candidate 77	22.9416	1.24135e-07	0.00774075	0.0632589	0.817464
Candidate 78	26.6044	9.80131e-09	0.0148382	0.00499471	1.56699
Candidate 79	29.0334	1.81998e-09	0	0.000927452	0
Candidate 80	17.4887	5.43733e-06	0.0150907	2.77084	1.59366
Candidate 81	15.3528	2.38971e-05	0.015056	12.1779	1.58999
Candidate 82	23.5656	8.05489e-08	0.00289727	0.0410474	0.305967
Candidate 83	24.703	3.66152e-08	0.00350271	0.0186589	0.369905
Candidate 84	18.5687	2.57201e-06	0.0128019	1.31068	1.35195
Candidate 85	24.0713	5.6729e-08	0.0469172	0.0289088	4.9547
Candidate 86	27.8477	4.14011e-09	0.00692335	0.00210978	0.731142
Candidate 87	16.8004	8.76119e-06	0.00971086	4.46466	1.02552
Candidate 88	21.3928	3.63182e-07	0.0433882	0.185076	4.58202
Candidate 89	27.1228	6.8427e-09	0.0133754	0.00348701	1.41251
Candidate 90	22.8581	1.31532e-07	0.00391789	0.0670283	0.41375
Candidate 91	21.9711	2.43234e-07	0.00419358	0.123951	0.442864
Candidate 92	26.302	1.20867e-08	0.00620192	0.00615931	0.654955
Candidate 93	30.7357	5.59291e-10	0.00769907	0.000285012	0.813062
Candidate 94	18.7267	2.30523e-06	0.0154711	1.17473	1.63383
Candidate 95	25.23	2.54108e-08	0.00765664	0.0129493	0.808581
Candidate 96	37.0779	6.89338e-12	0.00179492	3.51283e-06	0.189553
Candidate 97	24.0078	5.92813e-08	0.00361537	0.0302095	0.381803
Candidate 98	20.2156	8.21314e-07	0.0227949	0.418538	2.40726
Candidate 99	22.92	1.26011e-07	0.00635386	0.0642145	0.671001
Candidate 100	26.2524	1.25097e-08	0.00413297	0.0063749	0.436463
Sum		0.000196234	0.946923	100	100
